# Supplementary material
Source: publisher site journal article supplement (https://www.dovepress.com/article/573066)
Supplement: Supplementary file 1 [file Supplementary%20Materials.pdf]

## Supplementary Materials

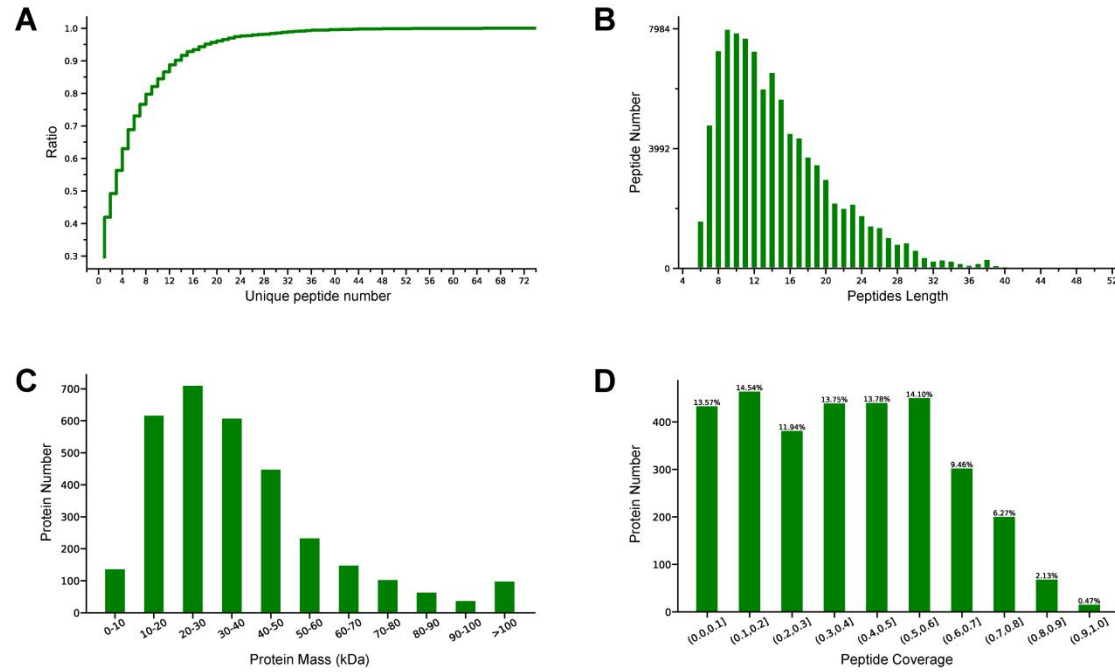

Figure S1. Profiles of the whole-cell-lysate proteins identified in the MDR, XDR, and DS strains. (A) Quantitative distribution of unique peptides identified for individual proteins. (B) Length distribution of the identified peptides. (C) Distribution of molecular mass among all identified proteins. (D) Proportional distribution of the amino acid sequence of each identified protein covered by peptides.

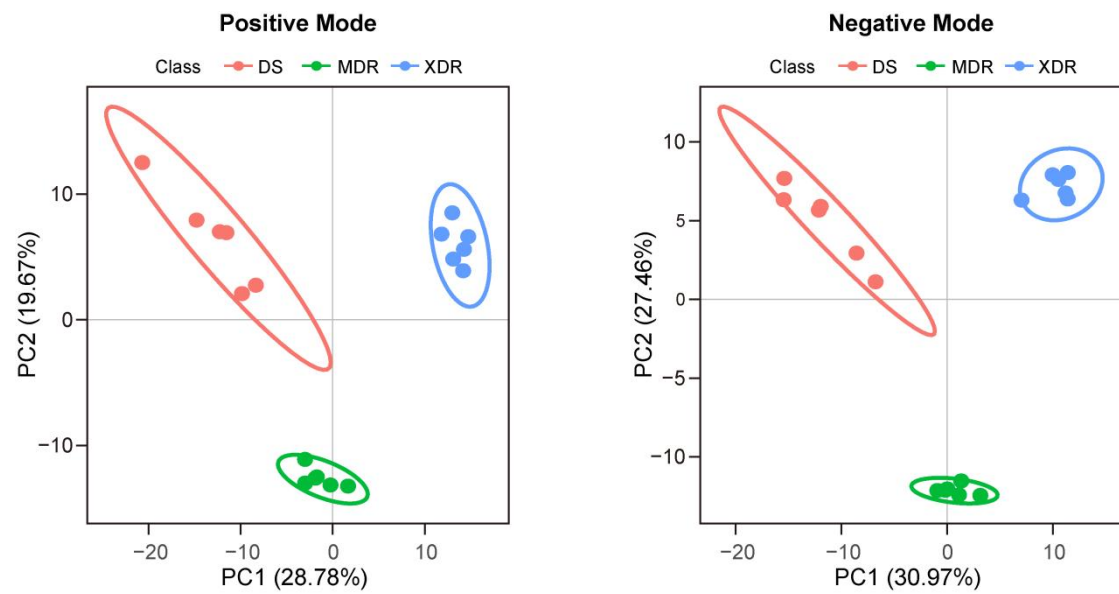

Figure S2. PCA of total metabolic data of the MDR, XDR, and DS strains under the positive (left) and negative (right) ion modes.

**Table S1: TMT labeling information of the DS, MDR and XDR strains.**

| <b>Strains</b> | <b>Sample ID</b> | <b>TMT isotope</b> |
|----------------|------------------|--------------------|
| DS             | DS-1             | 127N               |
|                | DS-2             | 128N               |
|                | DS-3             | 129N               |
| MDR            | MDR-1            | 130N               |
|                | MDR-2            | 131N               |
|                | MDR-3            | 132N               |
| XDR            | XDR-1            | 133N               |
|                | XDR-2            | 134N               |
|                | XDR-3            | 135N               |

**Table S2: DEPs in MDR vs. DS strains.**

| Protein ID | Description                                                                        | Protein Coverage (%) | Peptides | PSMs | Unique Peptide Number | Mass [kDa] | Protein Sequence                                                                                                                                                                                                                                                                                                                                                                                                                                                                                                                                                                                                                                                                                                                                                                                                                                                                                                                                                                                                                                                                                                                                                                                              | FC MDR/DS | P-value MDR/DS | Regulate |
|------------|------------------------------------------------------------------------------------|----------------------|----------|------|-----------------------|------------|---------------------------------------------------------------------------------------------------------------------------------------------------------------------------------------------------------------------------------------------------------------------------------------------------------------------------------------------------------------------------------------------------------------------------------------------------------------------------------------------------------------------------------------------------------------------------------------------------------------------------------------------------------------------------------------------------------------------------------------------------------------------------------------------------------------------------------------------------------------------------------------------------------------------------------------------------------------------------------------------------------------------------------------------------------------------------------------------------------------------------------------------------------------------------------------------------------------|-----------|----------------|----------|
| A0A009G507 | Glycosyltransferase subfamily 4-like, N-terminal domain                            | 48                   | 12       | 21   | 11                    | 42.9       | MQNKKIVLIGTTGSSFYGFRA DLIRSLVANGHQVY AFTSEY TENCLDKIKALGAEPITYQLSRGG L NPFADIASTYQLIRKIKKIKPDI VFSYFAKPVIIYGT LAASF AKVPHIIGMLEGLGYTFTAQPEGQSS KTKLIRNIQVLLYRLAF PRLDDMIFLNPDDEKDLIHTY TLPVKKVHILGGIGLDLKEYSYSVAPVSVSFLFIGRLLKEKGIFEFIDAIRIVKHKYPNTKFTILGGLDTQNMGALS KSQLDELIAEGLFEYPG HVS NVKDWIANS SVFVLP SYREGVPRSTQEAMAIGRPVITTDVPGCRETVINDVNGFIVPCWDA KALAEKMCFFIESPSQINLMGLESMKMAHQKFDAEKVNNRLEFIMG LNSSSYEKIG MSQTSKTEDTIDLKELFFSLIAQWKLVLCILISLVCALIYLRVTPNTYSVDALVQVEDTKSAASA ALLGELSKMVDQKSPAQAEIEVLT SRMV LGQVINNLNLDITIKNHDDTFFNRLLSQDKQNI DYKK DAVTFSNKDSYFSIQQLQIPSYLLDKP LLLSFKDQRHFTFSYKDKVIFSGQLNSNNLVTAREGQW KVRINSTHAPSVEQQFTISKLALPTAVQKLGSTYGVAER GKQTGVISLNYQGTDKEHITEVLNNI LAVYHSQNIERRTLESKQTLDFLDKQLPDLKQQL EESERKFNQFREKYNTVDVTQEAE LYLKQNI ALETTKTELKQKQAE LA AAKY TNDHPLMAEINAQLAAV NKKSAELSDTLKRLPEVQRQYLQLYR DVKVNTELYTSLNSYQQLKIAKAGEIGNVRIIDTA VEPVNP IKPKTLIVLVTIFIGGFIGILIALLR NMLRTGVKDSTQIENDLNLPVYATVPRSPIQETRMN ILK KKKKSIPI LAVKSSDDIAIESLRSIRTAIH FALTTAKNNIIM IAGPSPEVGKSFISTNLATIFAQSNKRVL LIDADMRRGYMHKYFDVDVKPGLS ELLSGQADLSQVLHKTQVANL DVITRGKSP TNPSEMLSSTQFKDLLEK FQTQYDHIIDTPPVLA V TDGHIISQYTG VNLIVARYAKSHMKELELTINRFEQAGVKVNGFILNDIQRSSGGGYGYNYAYAY KAKQED | 3.3776169 | 0.024210395    | up       |
| A0A009G8E9 | Tyrosine-protein kinase wzc-like, C-terminal domain                                | 45                   | 27       | 88   | 18                    | 82.0       | MFNLEQLHIAIIGLGYVGLPLAVEFGKKVPVIGFDIHQKRIDELNNGQDHTLEVSK EEIQQAVKLR YTSSELEDLKDCNFFIVTVP TIDDFKQPD LTPLIKASTSIGQALKKGDVVVYESTVYPGATEEVCIP VLEKISGLNFNQDFAGYSPERINPGDKLHRVTN ILKITSGSTPEVADYVDEVYNLIEAGTHKAPS IKVAEAAKVIENTQRDVNIALINELALIFNKLNI DTEVDLKAAGTKWNFLPFRPGLVGGHCIGVD PYYLTHKAQSIGLHPEIILAARRLNDRMGEYVATQLIKEMVKQRIQVVGARILVMGLSFKENC PD IRNTKIVDFIKALKEYDLDLDIYDPWVDENEVQHE YGLAPIKKLGNGLYDAIVIAVAHNQFKTM RAQEFQALGKEKYVLYDLKYILDKTESDLRL MTDIVIVNGARTAMGGFQGSLSGLTAPELGAVTIKEAIARAGLQPTDVEEVIMGCVLPAGLKQG PARQAMRKAGLPDSTGAVTINKLCGSGMKAVMQAADM IKAGSAEIVVAGGMESMTNAPYVLP KARAGYRMGHGEIKDHMFFDGL EDAETGRLMG SFAQDMANTRGYTREQMDDFAIRSLKRAQT AITEGYFKDEIVPVTVSTRKGDVIVDQDEQPLNAKIDKIPSLKPAFAKDGTTT AANASSISDGASAL VLTSSVAAQRGLQPLAKIIATASN SQHPSEFTIAPVGAIEKVLKKAGWNAQDV DLWEINEAFAMVTMCPIDDFKLDPEKVNIHGGACALGHPVVGSTGSR IILTLIHALKRTGGKKGVAALCIGGGEATAVAIEIL                                                                                                                                                                                                                                                                                                                                       | 3.6946457 | 1.61E-06       | up       |
| A0A009G8K1 | UDP-N-acetyl-D-mannosamine/glucosamine dehydrogenase                               | 53                   | 19       | 40   | 11                    | 47.7       | MTDIVIVNGARTAMGGFQGSLSGLTAPELGAVTIKEAIARAGLQPTDVEEVIMGCVLPAGLKQG PARQAMRKAGLPDSTGAVTINKLCGSGMKAVMQAADM IKAGSAEIVVAGGMESMTNAPYVLP KARAGYRMGHGEIKDHMFFDGL EDAETGRLMG SFAQDMANTRGYTREQMDDFAIRSLKRAQT AITEGYFKDEIVPVTVSTRKGDVIVDQDEQPLNAKIDKIPSLKPAFAKDGTTT AANASSISDGASAL VLTSSVAAQRGLQPLAKIIATASN SQHPSEFTIAPVGAIEKVLKKAGWNAQDV DLWEINEAFAMVTMCPIDDFKLDPEKVNIHGGACALGHPVVGSTGSR IILTLIHALKRTGGKKGVAALCIGGGEATAVAIEIL                                                                                                                                                                                                                                                                                                                                                                                                                                                                                                                                                                                                                                                                                                                                                                                            | 4.7483918 | 0.002389953    | up       |
| A0A009GVM1 | Thiolase                                                                           | 83                   | 21       | 98   | 1                     | 40.8       | MQINNILVVCVGNICRSPMAEYLLKRQFPHLHIESAGISGLIGNADEKAQLCMQRLGINMQAHI AQKLD AEHIK RADLILVMSHNQQKHIEQTWPFAKGKTFRLGHWQKNV PDPYQHDQTFDETC ELIQKCLDDWKNYI                                                                                                                                                                                                                                                                                                                                                                                                                                                                                                                                                                                                                                                                                                                                                                                                                                                                                                                                                                                                                                                              | 0.4729619 | 0.001024408    | down     |
| A0A009H3M3 | Protein-tyrosine phosphatase, low molecular weight                                 | 40                   | 5        | 12   | 2                     | 16.5       | MSLLAFSSYALNGVDAQKFLQGQVTV DTERLAENETRYTAICDLKGR IHFGLWLKKNNAESFDII VTQDQAE EFAKH IKKYGAFSKMTLSEQGA VFPKVVNGHTEFSSTETDISEWQKQAIMTGQAWIA QATEHEFPQELRLHQREGVNYDKGCYLGQEIVARLWFKAKPKHWLHLVQGTGDAPAPATQL HNDVEVVNSTQT TDGYIALVVAKPAALQELGLQVLDLPEALSGDVARPQ                                                                                                                                                                                                                                                                                                                                                                                                                                                                                                                                                                                                                                                                                                                                                                                                                                                                                                                                                      | 4.4741581 | 9.34E-05       | up       |
| A0A009HXJ2 | Aminomethyltransferase folate-binding domain protein                               | 42                   | 8        | 28   | 1                     | 26.7       | MISPTRLASFNDMQDSNFFTQFLNICCEKPVQPSYTEYVSLQH ALYEGDIEMDKVIDWVMQNPK DHRIIFEKILFQGRDELSEPI TELENFFNYIEQKPDWLDQQQIDEAVKFTHRLGINNGFILRDLSL MAGYLYPGFNQPLILTGALKKEAGTR LAETTKWVVDITEPHGLSRLSAGFTSTIYVRFIHALVRR QLKKS DRWDNEVWGIPLNQFDL AMTNLAFSSVLLGIRALGIWPTKQEAKSFLHFWR YVGVWLGIEEKWLIQSEPEGWRLLYWMQFAHPRSDHSSIELGSSLSKEPLERKYLHLRSLQQLAYRQH LELTQFFIGK KRMKLLGLPQQSASWFAYYLIVRNLLLYNGAKLSPKVEKFLSKSGRNIQKLG LTL YQNQGKAKTLASMHHSNGI                                                                                                                                                                                                                                                                                                                                                                                                                                                                                                                                                                                                                                                                                                                                                                              | 2.8378378 | 0.000930438    | up       |
| A0A009PBA1 | ER-bound oxygenase mpaB/mpaB'/Rubber oxygenase catalytic domain-containing protein | 7                    | 3        | 4    | 1                     | 47.3       | MVIDFKQDILAPVATDFAAMDHLIN EGISSKVLVMSVSKHVVEAGGKMRMPIMCLLAARACGL DNMQNAQR LAAIIMLHTATLVHDDVVDESGLRRGRPTANATWNNQTAVLVGDFLIARAFD LLVDLNNM TLLKDFSTGTCEIAEGEV LQLQSQHPDTTEETYLKI IHGKTSR L FELATEGAAILAGQE AYREPLRLFAGHFGNAFQIIDDLDYTSDAEILGKNIGD DLMEGKPTLPLISALAHSTGEEHAIIRR SIATGGVDQLPKVIEIVQKSGALDYCQRR AQEETEALQALSILPDTPYRQALINLTRLALHRIQ                                                                                                                                                                                                                                                                                                                                                                                                                                                                                                                                                                                                                                                                                                                                                                                                                                                                 | 9.7973274 | 0.019807672    | up       |
| A0A009QKJ4 | Polyprenyl synthetase family protein                                               | 61                   | 13       | 51   | 1                     | 35.5       | MVIDFKQDILAPVATDFAAMDHLIN EGISSKVLVMSVSKHVVEAGGKMRMPIMCLLAARACGL DNMQNAQR LAAIIMLHTATLVHDDVVDESGLRRGRPTANATWNNQTAVLVGDFLIARAFD LLVDLNNM TLLKDFSTGTCEIAEGEV LQLQSQHPDTTEETYLKI IHGKTSR L FELATEGAAILAGQE AYREPLRLFAGHFGNAFQIIDDLDYTSDAEILGKNIGD DLMEGKPTLPLISALAHSTGEEHAIIRR SIATGGVDQLPKVIEIVQKSGALDYCQRR AQEETEALQALSILPDTPYRQALINLTRLALHRIQ                                                                                                                                                                                                                                                                                                                                                                                                                                                                                                                                                                                                                                                                                                                                                                                                                                                                 | 0.1309586 | 0.024208892    | down     |

|            |                                                                           |    |    |     |   |       |                                                                                                                                                                                                                                                                                                                                                                                                                                                                                                                                                                                                                                                                                                                                                                                                                                                                                                                                                                                                                                                                                                                                                                                                                                                                                                                                                                                                                                                                                                      |           |             |      |
|------------|---------------------------------------------------------------------------|----|----|-----|---|-------|------------------------------------------------------------------------------------------------------------------------------------------------------------------------------------------------------------------------------------------------------------------------------------------------------------------------------------------------------------------------------------------------------------------------------------------------------------------------------------------------------------------------------------------------------------------------------------------------------------------------------------------------------------------------------------------------------------------------------------------------------------------------------------------------------------------------------------------------------------------------------------------------------------------------------------------------------------------------------------------------------------------------------------------------------------------------------------------------------------------------------------------------------------------------------------------------------------------------------------------------------------------------------------------------------------------------------------------------------------------------------------------------------------------------------------------------------------------------------------------------------|-----------|-------------|------|
| A0A009T164 | DUF4393 domain-containing protein                                         | 30 | 6  | 9   | 6 | 27.2  | MTEKDNLNASFLDHRVATYKAIAGLIPGFGSILSEVVGAIPDQRMRLVKYIKILDTKVQKINS<br>DLLEIAKQNELAIDLIEEGFVQASRSLNERREYIANVVANGISDEEKYADSKYILKLLGELNDQ<br>EVIWLRFFLHPTFDGDDEFRQQHQNVIEPIATYIGADENILEKKDIQESYKSHLERLGLIRSNYRID<br>KNTGLPKFNHQGVPEVSYRFVTPGLKMLKKIGLIDSANT                                                                                                                                                                                                                                                                                                                                                                                                                                                                                                                                                                                                                                                                                                                                                                                                                                                                                                                                                                                                                                                                                                                                                                                                                                                | 3.4554463 | 0.0019882   | up   |
| A0A062I638 | Endoribonuclease L-PSP family protein                                     | 24 | 2  | 2   | 1 | 14.7  | MRTAIFPQDRHALYEQHGYSAAIQSKDLLFVSGQVGSLEDGSPVPDFEKQVIQAFKNLAETLKA<br>AGCTFDDIIDVTTFHTDPERQFKSIMKVKNQIFTQKPPNWTAVGVTWLAGFDFEIKVIARIPHN<br>N<br>MKVQPNDSKIYDLAVIGGGINGVGIANDAAGRGLSVFLCEKDDLASHTSSASSKLIHGGLRYLE<br>HKEFRLVREALAEREVLLAKAPHIIKPMRFIMPHRPHLRPAWLIRAGLFFYDHLGKREKLLGSNLI<br>YFKEDSPLKPAITRGFEYSDCTVDDARLVVLNALQAKEKGAKEVVTTRTSCVKAYRQOELWHELEL<br>QSRAEFYQIRAKAIVNAAGPWWVEIISKNLGLSSPYQIRLIQGSHTVVPKLYDCHKAFIMQNEARRI<br>VFAIPYLEKEYTLIGTTDQEYTGDPQKVEITDVEIDYLLVTNSHFKKQLTRADIVSQYSGVRALC<br>DDESDNPSAITRDYTLALQAEDKTTPLLSVFGGKITYRKLAEAALEHLAPFFNDMAEEWTADE<br>ALPGAENWTTLEDLINQIKTRVSGISDSLNRWAHAYGTRVWNMLKERNIAEQLGQHFHGHDLF<br>ECEVRYLCEYEAHTAEDILWRRSKLGLAFDEKQVKVLEAYLAERRLKDDAA                                                                                                                                                                                                                                                                                                                                                                                                                                                                                                                                                                                                                                                                                                                                                                                                   | 2.9206882 | 0.015092862 | up   |
| A0A062IDU6 | Glycerol-3-phosphate dehydrogenase                                        | 40 | 17 | 27  | 1 | 57.4  | MQKVWSISGRSIAVSALALALAACQSMRGPPEPVVKTDPQSYAYNSASGTSIAEQGYKQFFADPR<br>LLEVIDLALANNRDLRTATLNIERAQQYQITQNNQLPTIGASGSAIRQVQSQRDPNPNPYSTYQV<br>GLGVTAYELDFWGRVRSKDAALDSYLATQSARDSTQISLISQVAQAWLNYSFATANLRLAEQT<br>LKAQLDSYNLNKRRFDVGDSEVPLRQAQISVETARNVDVANYKTQIAQAQNLNLLVGPVPQN<br>LLTPQVPVKRIAQQNVFTAGLPSDLLNRPDVKAEEYNLSAAGANIGAAKARLFPTISLTGSAGYA<br>STDLSDLFKSGGFVWSVGPSLDLPIFDWGTTRRANVKISETDQKIALSDYEKSVQSAFREVNDALA<br>TRANIGERLTAQQLVEATNRNYTLNARFRAGIDSYLTVLDAQRSSYAAEQGLLLLQANLNN<br>QIELYKTLGGGLKANTSDTVVHQPSTAELKKQ                                                                                                                                                                                                                                                                                                                                                                                                                                                                                                                                                                                                                                                                                                                                                                                                                                                                                                                                                                          | 6.3592133 | 0.004022169 | up   |
| A0A062IH37 | Efflux transporter, outer membrane factor (OMF) lipo, NodT family protein | 75 | 25 | 134 | 1 | 52.8  | MTDAQTAQNIATTYDPTIEIEKKWYKTWEEQGYFKPSGHGESFCIMIPPPNVTGSLHMGHGFFN<br>AIMDALTRYNRMGMKNTLWQPGTDHAGIATQMVVERQLGLQGITRHDLGREKFKIEKVVWEWKE<br>QSGGTITKQIRRLGSSVDWSRERFTMDEGLSNAVKEVFRVRLHEDGLIYRGKRLVNWDPKLTAL<br>SDLEVESKEEKGSLWHFKYFEDKSVKTQDGKDYLVVATTRPETLLGDTAVAVHPEDERYAHL<br>VGKNIVLPITGRLLPIVADDYVEKDFGTGCVKITPAHDFNDYELGKRNSLPIINIFNKNAEVLGEFE<br>YIAKAGEQISKTITAPADYAGLERFEARKKLVAQAEAEGLDQIQPYDLKAPRGDRSGVIEPPL<br>TDQWYVKIAPLAEPALAEAVQDGRIFVPEQYSNMYMAWMRDIQDWICISRQLWWGHRIPAWYD<br>ADGNIYVGRSEEEVRAKNNAADIELKQDEVDLDTWFSSALWTFSTLWPEQTPELKTFHPTDV<br>LVTGFDIIFWVARMIMMTMHFMKNEDGSSQIPFKTVYVHGLVRDGEQKMSKSKGNVLDPLD<br>LIDGIDLESVAKRRTTGLMNPKDAKIEKSTRKEFPDGINAYGTDAVRFTFALANTGRDIKFDL<br>KRVEGYRNFCKIWNATRFVLMNVEGQTVGTDARPDWELPEQWISRLQKAEAAVHQAFATY<br>RLDLAAQAIYDFIWNEYCDWYVELTKPVLNDAEVSEERKAEVRRVLLAVMEASRLAHPLMPY<br>LTEEIWQTLAPMLGQGGPTIMTAQYPIPEQAKINEQAEADMQWLQGLIGAVRNIRGEMGLGNA<br>RLLPVLLQNISNAEREQITRIEALFKALAKVESIEFLGKDQEPPLSSSSVVGHASVFPMPKGLIDPK<br>AELARLQKDLDKIQKQHDQIANKLANEGFVSKAPAAVVEGEKAKLAEFAAQLDKVKANMEQIA<br>AL<br>MKTHKSLMVSVLSITLQVHAQAAAAFDPNGSWMLGDWNGQRTALQAQGYDFSFGYTGE<br>YAGILDSKQSTHGSAYTGQALGSHLDLKGILGWQDTEAQITLTYRDGQSLSEHSPALAGHQSS<br>VQEVWGREQTWRLTDLWIKKFLDQKLDVKVGRFGEDEFNSFDCDFQNLALCGSQVGNVW<br>GDQWYNWPVQSWAMRVKYNLQPDLYTQVGVYIENPENLERGKGFNLSTDGSHGAIIPAEV<br>WSPKLGVSMPGEYRLGYYYSTADAKEIADSTKTSHKQGVVWTAQKQLFQPADQTDRLTGF<br>VNLTFHSDTNKVDNMQNIQLVYKGLLNQRPQDELALGVARIHINDDWSVQAKEYDTEYNT<br>L YYGIHATNWL TIRPNVQYVRHV GALKNGDNTWVGGIKFSTAF | 4.7510868 | 0.014454606 | up   |
| A0A062IRH0 | Valine--tRNA ligase                                                       | 53 | 42 | 188 | 1 | 108.5 | MKTHKSLMVSVLSITLQVHAQAAAAFDPNGSWMLGDWNGQRTALQAQGYDFSFGYTGE<br>YAGILDSKQSTHGSAYTGQALGSHLDLKGILGWQDTEAQITLTYRDGQSLSEHSPALAGHQSS<br>VQEVWGREQTWRLTDLWIKKFLDQKLDVKVGRFGEDEFNSFDCDFQNLALCGSQVGNVW<br>GDQWYNWPVQSWAMRVKYNLQPDLYTQVGVYIENPENLERGKGFNLSTDGSHGAIIPAEV<br>WSPKLGVSMPGEYRLGYYYSTADAKEIADSTKTSHKQGVVWTAQKQLFQPADQTDRLTGF<br>VNLTFHSDTNKVDNMQNIQLVYKGLLNQRPQDELALGVARIHINDDWSVQAKEYDTEYNT<br>L YYGIHATNWL TIRPNVQYVRHV GALKNGDNTWVGGIKFSTAF                                                                                                                                                                                                                                                                                                                                                                                                                                                                                                                                                                                                                                                                                                                                                                                                                                                                                                                                                                                                                                                       | 5.5260299 | 0.000178912 | up   |
| A0A062IS18 | Porin B                                                                   | 50 | 15 | 78  | 1 | 46.8  | MKTHKSLMVSVLSITLQVHAQAAAAFDPNGSWMLGDWNGQRTALQAQGYDFSFGYTGE<br>YAGILDSKQSTHGSAYTGQALGSHLDLKGILGWQDTEAQITLTYRDGQSLSEHSPALAGHQSS<br>VQEVWGREQTWRLTDLWIKKFLDQKLDVKVGRFGEDEFNSFDCDFQNLALCGSQVGNVW<br>GDQWYNWPVQSWAMRVKYNLQPDLYTQVGVYIENPENLERGKGFNLSTDGSHGAIIPAEV<br>WSPKLGVSMPGEYRLGYYYSTADAKEIADSTKTSHKQGVVWTAQKQLFQPADQTDRLTGF<br>VNLTFHSDTNKVDNMQNIQLVYKGLLNQRPQDELALGVARIHINDDWSVQAKEYDTEYNT<br>L YYGIHATNWL TIRPNVQYVRHV GALKNGDNTWVGGIKFSTAF                                                                                                                                                                                                                                                                                                                                                                                                                                                                                                                                                                                                                                                                                                                                                                                                                                                                                                                                                                                                                                                       | 2.4314241 | 0.001234418 | up   |
| A0A097I5C2 | FnlC                                                                      | 40 | 10 | 44  | 2 | 42.8  | AGATGAETIGNVIAVDKILDEVKPEALLVLGDTNSCMAVLPKRKRKIPTFHMEAGNRCFDMRV<br>PEEINRRIVDHTADINLTYSTIARDYLLAEGLPADLVIKSGSPMFEVLHHYKAKIEASDVLERLNL<br>KEHEYFIVSAHREENINSDQNFLDLVEMLNAVAEKYKYPVIVSTHPRTRKRIEELNVEFHPLIQLL<br>KPLGFSYDYNKQLSAAALSDSGTINEESSILNFPALNLRQAHERPEGMEEAAMVMVGLKAERIL<br>QGLAILEGQTRGEDRLLRLVEDYSMPNVSEKVVRIIMS YTDYVNRVIWKQF                                                                                                                                                                                                                                                                                                                                                                                                                                                                                                                                                                                                                                                                                                                                                                                                                                                                                                                                                                                                                                                                                                                                                              | 0.2078959 | 0.014078591 | down |

|            |                                                            |    |    |     |    |      |                                                                                                                                                                                                                                                                                                                                                                                                                                                                                                                                                                                                                                                                                                                                                                                                                                                                                                                                                                                                                                                                                                                                                                                                                                                                                                                                                                                                                                                                                                                                                                                                                                                                                                                                                                                                                                                                                                                                                                                                                                                                                                                                                                                                                                                                                                                                                                                                                                                                                                                                                                                                                                                                                                                                                                                                                                                                                                                                                                                                                                                                                                                                                                                                                                                                                                                                                                                                                                                            |           |             |      |
|------------|------------------------------------------------------------|----|----|-----|----|------|------------------------------------------------------------------------------------------------------------------------------------------------------------------------------------------------------------------------------------------------------------------------------------------------------------------------------------------------------------------------------------------------------------------------------------------------------------------------------------------------------------------------------------------------------------------------------------------------------------------------------------------------------------------------------------------------------------------------------------------------------------------------------------------------------------------------------------------------------------------------------------------------------------------------------------------------------------------------------------------------------------------------------------------------------------------------------------------------------------------------------------------------------------------------------------------------------------------------------------------------------------------------------------------------------------------------------------------------------------------------------------------------------------------------------------------------------------------------------------------------------------------------------------------------------------------------------------------------------------------------------------------------------------------------------------------------------------------------------------------------------------------------------------------------------------------------------------------------------------------------------------------------------------------------------------------------------------------------------------------------------------------------------------------------------------------------------------------------------------------------------------------------------------------------------------------------------------------------------------------------------------------------------------------------------------------------------------------------------------------------------------------------------------------------------------------------------------------------------------------------------------------------------------------------------------------------------------------------------------------------------------------------------------------------------------------------------------------------------------------------------------------------------------------------------------------------------------------------------------------------------------------------------------------------------------------------------------------------------------------------------------------------------------------------------------------------------------------------------------------------------------------------------------------------------------------------------------------------------------------------------------------------------------------------------------------------------------------------------------------------------------------------------------------------------------------------------------|-----------|-------------|------|
| A0A0E1FL10 | Glucose-6-phosphate isomerase                              | 26 | 13 | 20  | 9  | 62.9 | MKSISIEQFPKDLSSPLIQLKSSVEKNSKHLHIKELFALEPERFQNYSVKFDQLFFDYSKQRITKNILE<br>QLVALANNKQLTQWINRFLFSQDKINCTEQREAMHWALRLPSEYSKFPPELAKQVHIQLQRMYTL<br>VEKIHAGQYRGATGEVIQDVVNIGVGGSDLGPHMVTHALADFKVKAKPLNVHFVSTMDGSQ<br>SDDLHLQLRPETTLFISSKSFGTIDTLSNAQTVRQWLEKALGKHDRVVKSHFIGVSTKAEMKTEW<br>GIAPDNQLLLWDVWVGGRYSLWSCIGFPALITIGIDGFQQLLAGAHAVDEHFQNTSFERNIPVLM<br>LLGIWNNNFLNIQTHAVLPYDGRLLYFAAYLQQLEMESNGKSVQRDQKVELDTCPIVWGEV<br>PNAQHAFYQLLHQGTQAVSCDFIAPVQRYNADHFTYVENAEALIEQHHLALSNCCLAQSRLAFG<br>NEALDAAELKNLPYKQYEGNQPSSTLLDELNPYNLGMGLIALYEHKVFVQSVIWNINPFQDWG<br>VEKKGQIADQLLPILNGVQNDFSKLDASTRGLIKILLGKVDG<br>MRYKNTIVRITVDMSEFVPQIKIPATYMRGGTSKGVFFKLDLPEKAQVAGQARDQLLLRVIGSP<br>DPYGKQIDGMGGATSSSTKTVILAKSTQPDHDVDYLFQGVSIDQAFVDWWSGNCGNLTAAVGSF<br>AISNGLVDADRIPEGLCTVRIWQKNIQKTIIAHVPIINGQVQETGDFELDGVTFPAAEVQIEFLDP<br>ADDGEEGGDMFPTGNVVDQLDVPEIGSFQATFINAGIPTIFLNAEDLGVEGTELDQDHINGDAAAL<br>ARFEKIRAYGAVQMGLIKDISEAAARQHTPKIAFVSKPKNYTASSGKNVSENDADLLVRALSMG<br>KLHHAMMGTAAVAIGTAAAIPTLVNLAAGGGEREAVRFHGPHSGTLRVAQAELTNQWVVK<br>KAIMRSARVLMEGWVRVPGDSF<br>MKFKERLKMKLKHLSTAMILATLPATGVFAAALDRSGQSMAFFQPGNYFEAGISVLDPDVAG<br>KEAGSSATRRDIGDMANDYYPFSAALKLQINDQFSFGLLYDQPFQADAEYSGNNVFSNPGSDTI<br>LSQKALGDLASSIQKLVQASGSAFTPALIEVTKVTGGDPTKPTQTEILGALQVVAAGGNTTVGA<br>GLTALQKTQAAINAANNYLGTGGTKVKVDTONLSFVGYQPTKNFNFYAGPVLQTVKGNVSLR<br>GQAYSLYNGYDANIKETTGAAGWLAGAAYQIPEIALRASVTYRSEIDHKVNIDENLSILNFPGLTS<br>VLAGLDVPASKLQAINSSGKTTITTPQSVNLDFTGTGIMADTVAFANVRWVNWKDFSIQPKYKFGK<br>VSEAVGGLVGRPNGFNLVEYSDDQWSVNAGVGRKLNKWAAGNVSVGWDSGAGNPTTLGPT<br>EGYWNVGLGVQYSPTPTQFIAGGVKYFWLGDAAKQGAQAGSDEYVADFSDNNAIAYGLKLG<br>YKF<br>MMDLFLNRKSFVVKSLAITVTALMMSGANAATSDKEIRKLRQEVEALKALVQEQRVQVQQQ<br>QQVQQQQVQLAEVKAQPQVAAAPVPLAGFKSKAGADVNLVYGFVRGDANYIIEGADNDFGD<br>VSKSDGKTHDKLRATAKTTRLGLDFNTPVGGDKVGGKIEVDFAGSTTDSNGSLRIRHAYLTYNN<br>WLFQGTTSNFLANHAPEMIDFSTNIGGGTKRVPQVRYNYKLGPTTQLFVSAEKGDSTTSVTGDSI<br>KYSLPALTAKITQGYAEGRGSASARVLENYKSQLADDDKTGWGVAVGTDFKVSPLKLFADA<br>SYVVDNSYL YGSNSPYAVDGNISIEQNEFVAVVGGTYKILPNLRSTLAYGAQFSDGDYARL<br>NASANEKVQA WINFIYTPVKPIDLGEVYVNGKRDTFDGGKSYKDNRVGLMAKYSF<br>MPRPITAVIHRQALQNNLAVVRKAMPNSKVFAVVKANAYGHGIERVYEAFAKADGFALLDIEE<br>AKRIRALGWTGPILLLEGVFSPODLFCVQYQLSFTIHSQAQIEWVEQHPYPAQFDVFLKMNSGM<br>NRLGFKPQHYVQAWERLNNLANVAKITHMMHFSADGDRFGQGGIDYQITAFEEIVKDLPGER<br>SVSNSAAILRYQDQLKSDYVRSIMLYGSSPDYPTHSIADWGLQPTMSLRSEIISVQHLEPNESVG<br>YGSNFVAEQPMTIGIVACGYADGYQRISPTGTPVLVDSVTRTRTVGRVSMMLAVDLTGIESAKV<br>GSEVVLWQSSSTGVILPIDDAVSSGTVGYELMCAVTARVQFINQV<br>MSDFIQLEYLQEKLQQLLAESLFAIYLYGSAVDGGLGPESDLVLLVVTQPLTSALREQLAQELL<br>KISQPVGELQRPLEVITILLKDEIQSGNPLSYEMQFGEWLREELKEGGTSSQKDPDISILLRKARF<br>HHAVLFGPALDQW APEISDQELWQAMSDTYEIVAHWDEDADERNQILALCRIYFSLVMKDIAS<br>KDNAARVWKSQLPPEQKFLVLRLIQYRGEIGKQNWQEEHYALQPIVNFSSKIEEQFEQKRNL<br>MKNYFTCYVVASLFLSGCTVQHNLINEPQIVQGHNVQVIHQYFDEKNTSGVLVIQTDKKNINLY<br>GNALSRANTEYVPASTFKMLNALIGLENQKTDINEIFKWKGEKRSFTAWEKDMTLGEAMKLSA<br>VPVYQELARRIGLDLMQKEVKRIGFGNAEIQGVDFNLVGLPKVTPIQEVEFVSQLAHTQLPFS<br>EKVQANVKMMLLLEESNGYKIFGKTGWAMDIKQVGVLTGWVVEQPDGKIVAVALNMEMRSE<br>MPASIRNELLMKSLKQLNII<br>MNLPTTMKIVEITVPGGPEVLKQLQSDSNVVPQADEVLIEVKAAGINRPDVLQRMGLYPMPKGV<br>QIPGLEVAGVVAVGEVQVQKFGDKVCALTNNGGYAEYCAVATQVLPDENLSTQAAAPE<br>TFFT VWANLFDIGRLKDEALIHGGASGIGTTALAICHALGIKTFATVGSSEKVEALSDLTTAIN<br>YKTQDFEQEILNHTQEQQVDVILDVIGGSYFQKLNLLKRDGRLVIIGFMGGRIAKEFDLQKLILK<br>RATITGSTMARNRSQEKAQIAQSLHEHVWPLLAQGGKCLPQIYKTYAFSDVQSAHACMEQGDHIG<br>KIVLEMNA | 0.2436056 | 0.000153685 | down |
| A0A0E1PN17 | Uncharacterized protein                                    | 21 | 9  | 23  | 1  | 43.5 | ADDGEEGGDMFPTGNVVDQLDVPEIGSFQATFINAGIPTIFLNAEDLGVEGTELDQDHINGDAAAL<br>ARFEKIRAYGAVQMGLIKDISEAAARQHTPKIAFVSKPKNYTASSGKNVSENDADLLVRALSMG<br>KLHHAMMGTAAVAIGTAAAIPTLVNLAAGGGEREAVRFHGPHSGTLRVAQAELTNQWVVK<br>KAIMRSARVLMEGWVRVPGDSF<br>MKFKERLKMKLKHLSTAMILATLPATGVFAAALDRSGQSMAFFQPGNYFEAGISVLDPDVAG<br>KEAGSSATRRDIGDMANDYYPFSAALKLQINDQFSFGLLYDQPFQADAEYSGNNVFSNPGSDTI<br>LSQKALGDLASSIQKLVQASGSAFTPALIEVTKVTGGDPTKPTQTEILGALQVVAAGGNTTVGA<br>GLTALQKTQAAINAANNYLGTGGTKVKVDTONLSFVGYQPTKNFNFYAGPVLQTVKGNVSLR<br>GQAYSLYNGYDANIKETTGAAGWLAGAAYQIPEIALRASVTYRSEIDHKVNIDENLSILNFPGLTS<br>VLAGLDVPASKLQAINSSGKTTITTPQSVNLDFTGTGIMADTVAFANVRWVNWKDFSIQPKYKFGK<br>VSEAVGGLVGRPNGFNLVEYSDDQWSVNAGVGRKLNKWAAGNVSVGWDSGAGNPTTLGPT<br>EGYWNVGLGVQYSPTPTQFIAGGVKYFWLGDAAKQGAQAGSDEYVADFSDNNAIAYGLKLG<br>YKF<br>MMDLFLNRKSFVVKSLAITVTALMMSGANAATSDKEIRKLRQEVEALKALVQEQRVQVQQQ<br>QQVQQQQVQLAEVKAQPQVAAAPVPLAGFKSKAGADVNLVYGFVRGDANYIIEGADNDFGD<br>VSKSDGKTHDKLRATAKTTRLGLDFNTPVGGDKVGGKIEVDFAGSTTDSNGSLRIRHAYLTYNN<br>WLFQGTTSNFLANHAPEMIDFSTNIGGGTKRVPQVRYNYKLGPTTQLFVSAEKGDSTTSVTGDSI<br>KYSLPALTAKITQGYAEGRGSASARVLENYKSQLADDDKTGWGVAVGTDFKVSPLKLFADA<br>SYVVDNSYL YGSNSPYAVDGNISIEQNEFVAVVGGTYKILPNLRSTLAYGAQFSDGDYARL<br>NASANEKVQA WINFIYTPVKPIDLGEVYVNGKRDTFDGGKSYKDNRVGLMAKYSF<br>MPRPITAVIHRQALQNNLAVVRKAMPNSKVFAVVKANAYGHGIERVYEAFAKADGFALLDIEE<br>AKRIRALGWTGPILLLEGVFSPODLFCVQYQLSFTIHSQAQIEWVEQHPYPAQFDVFLKMNSGM<br>NRLGFKPQHYVQAWERLNNLANVAKITHMMHFSADGDRFGQGGIDYQITAFEEIVKDLPGER<br>SVSNSAAILRYQDQLKSDYVRSIMLYGSSPDYPTHSIADWGLQPTMSLRSEIISVQHLEPNESVG<br>YGSNFVAEQPMTIGIVACGYADGYQRISPTGTPVLVDSVTRTRTVGRVSMMLAVDLTGIESAKV<br>GSEVVLWQSSSTGVILPIDDAVSSGTVGYELMCAVTARVQFINQV<br>MSDFIQLEYLQEKLQQLLAESLFAIYLYGSAVDGGLGPESDLVLLVVTQPLTSALREQLAQELL<br>KISQPVGELQRPLEVITILLKDEIQSGNPLSYEMQFGEWLREELKEGGTSSQKDPDISILLRKARF<br>HHAVLFGPALDQW APEISDQELWQAMSDTYEIVAHWDEDADERNQILALCRIYFSLVMKDIAS<br>KDNAARVWKSQLPPEQKFLVLRLIQYRGEIGKQNWQEEHYALQPIVNFSSKIEEQFEQKRNL<br>MKNYFTCYVVASLFLSGCTVQHNLINEPQIVQGHNVQVIHQYFDEKNTSGVLVIQTDKKNINLY<br>GNALSRANTEYVPASTFKMLNALIGLENQKTDINEIFKWKGEKRSFTAWEKDMTLGEAMKLSA<br>VPVYQELARRIGLDLMQKEVKRIGFGNAEIQGVDFNLVGLPKVTPIQEVEFVSQLAHTQLPFS<br>EKVQANVKMMLLLEESNGYKIFGKTGWAMDIKQVGVLTGWVVEQPDGKIVAVALNMEMRSE<br>MPASIRNELLMKSLKQLNII<br>MNLPTTMKIVEITVPGGPEVLKQLQSDSNVVPQADEVLIEVKAAGINRPDVLQRMGLYPMPKGV<br>QIPGLEVAGVVAVGEVQVQKFGDKVCALTNNGGYAEYCAVATQVLPDENLSTQAAAPE<br>TFFT VWANLFDIGRLKDEALIHGGASGIGTTALAICHALGIKTFATVGSSEKVEALSDLTTAIN<br>YKTQDFEQEILNHTQEQQVDVILDVIGGSYFQKLNLLKRDGRLVIIGFMGGRIAKEFDLQKLILK<br>RATITGSTMARNRSQEKAQIAQSLHEHVWPLLAQGGKCLPQIYKTYAFSDVQSAHACMEQGDHIG<br>KIVLEMNA                                                                                                                                                                                                                                                                                                                                                                                                                                                                                                                                                                                                                                                                                                                                                                                                                              | 0.4011239 | 0.000110633 | down |
| A0A0E1PNX1 | Outer membrane protein transport protein (OMPP1/FadL/TodX) | 61 | 17 | 118 | 15 | 54.2 | ADDGEEGGDMFPTGNVVDQLDVPEIGSFQATFINAGIPTIFLNAEDLGVEGTELDQDHINGDAAAL<br>ARFEKIRAYGAVQMGLIKDISEAAARQHTPKIAFVSKPKNYTASSGKNVSENDADLLVRALSMG<br>KLHHAMMGTAAVAIGTAAAIPTLVNLAAGGGEREAVRFHGPHSGTLRVAQAELTNQWVVK<br>KAIMRSARVLMEGWVRVPGDSF<br>MKFKERLKMKLKHLSTAMILATLPATGVFAAALDRSGQSMAFFQPGNYFEAGISVLDPDVAG<br>KEAGSSATRRDIGDMANDYYPFSAALKLQINDQFSFGLLYDQPFQADAEYSGNNVFSNPGSDTI<br>LSQKALGDLASSIQKLVQASGSAFTPALIEVTKVTGGDPTKPTQTEILGALQVVAAGGNTTVGA<br>GLTALQKTQAAINAANNYLGTGGTKVKVDTONLSFVGYQPTKNFNFYAGPVLQTVKGNVSLR<br>GQAYSLYNGYDANIKETTGAAGWLAGAAYQIPEIALRASVTYRSEIDHKVNIDENLSILNFPGLTS<br>VLAGLDVPASKLQAINSSGKTTITTPQSVNLDFTGTGIMADTVAFANVRWVNWKDFSIQPKYKFGK<br>VSEAVGGLVGRPNGFNLVEYSDDQWSVNAGVGRKLNKWAAGNVSVGWDSGAGNPTTLGPT<br>EGYWNVGLGVQYSPTPTQFIAGGVKYFWLGDAAKQGAQAGSDEYVADFSDNNAIAYGLKLG<br>YKF<br>MMDLFLNRKSFVVKSLAITVTALMMSGANAATSDKEIRKLRQEVEALKALVQEQRVQVQQQ<br>QQVQQQQVQLAEVKAQPQVAAAPVPLAGFKSKAGADVNLVYGFVRGDANYIIEGADNDFGD<br>VSKSDGKTHDKLRATAKTTRLGLDFNTPVGGDKVGGKIEVDFAGSTTDSNGSLRIRHAYLTYNN<br>WLFQGTTSNFLANHAPEMIDFSTNIGGGTKRVPQVRYNYKLGPTTQLFVSAEKGDSTTSVTGDSI<br>KYSLPALTAKITQGYAEGRGSASARVLENYKSQLADDDKTGWGVAVGTDFKVSPLKLFADA<br>SYVVDNSYL YGSNSPYAVDGNISIEQNEFVAVVGGTYKILPNLRSTLAYGAQFSDGDYARL<br>NASANEKVQA WINFIYTPVKPIDLGEVYVNGKRDTFDGGKSYKDNRVGLMAKYSF<br>MPRPITAVIHRQALQNNLAVVRKAMPNSKVFAVVKANAYGHGIERVYEAFAKADGFALLDIEE<br>AKRIRALGWTGPILLLEGVFSPODLFCVQYQLSFTIHSQAQIEWVEQHPYPAQFDVFLKMNSGM<br>NRLGFKPQHYVQAWERLNNLANVAKITHMMHFSADGDRFGQGGIDYQITAFEEIVKDLPGER<br>SVSNSAAILRYQDQLKSDYVRSIMLYGSSPDYPTHSIADWGLQPTMSLRSEIISVQHLEPNESVG<br>YGSNFVAEQPMTIGIVACGYADGYQRISPTGTPVLVDSVTRTRTVGRVSMMLAVDLTGIESAKV<br>GSEVVLWQSSSTGVILPIDDAVSSGTVGYELMCAVTARVQFINQV<br>MSDFIQLEYLQEKLQQLLAESLFAIYLYGSAVDGGLGPESDLVLLVVTQPLTSALREQLAQELL<br>KISQPVGELQRPLEVITILLKDEIQSGNPLSYEMQFGEWLREELKEGGTSSQKDPDISILLRKARF<br>HHAVLFGPALDQW APEISDQELWQAMSDTYEIVAHWDEDADERNQILALCRIYFSLVMKDIAS<br>KDNAARVWKSQLPPEQKFLVLRLIQYRGEIGKQNWQEEHYALQPIVNFSSKIEEQFEQKRNL<br>MKNYFTCYVVASLFLSGCTVQHNLINEPQIVQGHNVQVIHQYFDEKNTSGVLVIQTDKKNINLY<br>GNALSRANTEYVPASTFKMLNALIGLENQKTDINEIFKWKGEKRSFTAWEKDMTLGEAMKLSA<br>VPVYQELARRIGLDLMQKEVKRIGFGNAEIQGVDFNLVGLPKVTPIQEVEFVSQLAHTQLPFS<br>EKVQANVKMMLLLEESNGYKIFGKTGWAMDIKQVGVLTGWVVEQPDGKIVAVALNMEMRSE<br>MPASIRNELLMKSLKQLNII<br>MNLPTTMKIVEITVPGGPEVLKQLQSDSNVVPQADEVLIEVKAAGINRPDVLQRMGLYPMPKGV<br>QIPGLEVAGVVAVGEVQVQKFGDKVCALTNNGGYAEYCAVATQVLPDENLSTQAAAPE<br>TFFT VWANLFDIGRLKDEALIHGGASGIGTTALAICHALGIKTFATVGSSEKVEALSDLTTAIN<br>YKTQDFEQEILNHTQEQQVDVILDVIGGSYFQKLNLLKRDGRLVIIGFMGGRIAKEFDLQKLILK<br>RATITGSTMARNRSQEKAQIAQSLHEHVWPLLAQGGKCLPQIYKTYAFSDVQSAHACMEQGDHIG<br>KIVLEMNA                                                                                                                                                                                                                                                                                                                                                                                                                                                                                                                                                                                                                                                                                                                                                                                                                              | 0.3490728 | 0.021088184 | down |
| A0A0E1PQH3 | DcaP outer membrane protein                                | 51 | 20 | 102 | 10 | 47.4 | WLFQGTTSNFLANHAPEMIDFSTNIGGGTKRVPQVRYNYKLGPTTQLFVSAEKGDSTTSVTGDSI<br>KYSLPALTAKITQGYAEGRGSASARVLENYKSQLADDDKTGWGVAVGTDFKVSPLKLFADA<br>SYVVDNSYL YGSNSPYAVDGNISIEQNEFVAVVGGTYKILPNLRSTLAYGAQFSDGDYARL<br>NASANEKVQA WINFIYTPVKPIDLGEVYVNGKRDTFDGGKSYKDNRVGLMAKYSF<br>MPRPITAVIHRQALQNNLAVVRKAMPNSKVFAVVKANAYGHGIERVYEAFAKADGFALLDIEE<br>AKRIRALGWTGPILLLEGVFSPODLFCVQYQLSFTIHSQAQIEWVEQHPYPAQFDVFLKMNSGM<br>NRLGFKPQHYVQAWERLNNLANVAKITHMMHFSADGDRFGQGGIDYQITAFEEIVKDLPGER<br>SVSNSAAILRYQDQLKSDYVRSIMLYGSSPDYPTHSIADWGLQPTMSLRSEIISVQHLEPNESVG<br>YGSNFVAEQPMTIGIVACGYADGYQRISPTGTPVLVDSVTRTRTVGRVSMMLAVDLTGIESAKV<br>GSEVVLWQSSSTGVILPIDDAVSSGTVGYELMCAVTARVQFINQV<br>MSDFIQLEYLQEKLQQLLAESLFAIYLYGSAVDGGLGPESDLVLLVVTQPLTSALREQLAQELL<br>KISQPVGELQRPLEVITILLKDEIQSGNPLSYEMQFGEWLREELKEGGTSSQKDPDISILLRKARF<br>HHAVLFGPALDQW APEISDQELWQAMSDTYEIVAHWDEDADERNQILALCRIYFSLVMKDIAS<br>KDNAARVWKSQLPPEQKFLVLRLIQYRGEIGKQNWQEEHYALQPIVNFSSKIEEQFEQKRNL<br>MKNYFTCYVVASLFLSGCTVQHNLINEPQIVQGHNVQVIHQYFDEKNTSGVLVIQTDKKNINLY<br>GNALSRANTEYVPASTFKMLNALIGLENQKTDINEIFKWKGEKRSFTAWEKDMTLGEAMKLSA<br>VPVYQELARRIGLDLMQKEVKRIGFGNAEIQGVDFNLVGLPKVTPIQEVEFVSQLAHTQLPFS<br>EKVQANVKMMLLLEESNGYKIFGKTGWAMDIKQVGVLTGWVVEQPDGKIVAVALNMEMRSE<br>MPASIRNELLMKSLKQLNII<br>MNLPTTMKIVEITVPGGPEVLKQLQSDSNVVPQADEVLIEVKAAGINRPDVLQRMGLYPMPKGV<br>QIPGLEVAGVVAVGEVQVQKFGDKVCALTNNGGYAEYCAVATQVLPDENLSTQAAAPE<br>TFFT VWANLFDIGRLKDEALIHGGASGIGTTALAICHALGIKTFATVGSSEKVEALSDLTTAIN<br>YKTQDFEQEILNHTQEQQVDVILDVIGGSYFQKLNLLKRDGRLVIIGFMGGRIAKEFDLQKLILK<br>RATITGSTMARNRSQEKAQIAQSLHEHVWPLLAQGGKCLPQIYKTYAFSDVQSAHACMEQGDHIG<br>KIVLEMNA                                                                                                                                                                                                                                                                                                                                                                                                                                                                                                                                                                                                                                                                                                                                                                                                                                                                                                                                                                                                                                                                                                                                                                                                                                                                                                                                                                                                                                                                                                                                                                                                                                                                                                                                                                                                                                        | 0.2056725 | 0.033611545 | down |
| A0A0E1PVE2 | Alanine racemase                                           | 30 | 10 | 34  | 3  | 40.5 | MPRPITAVIHRQALQNNLAVVRKAMPNSKVFAVVKANAYGHGIERVYEAFAKADGFALLDIEE<br>AKRIRALGWTGPILLLEGVFSPODLFCVQYQLSFTIHSQAQIEWVEQHPYPAQFDVFLKMNSGM<br>NRLGFKPQHYVQAWERLNNLANVAKITHMMHFSADGDRFGQGGIDYQITAFEEIVKDLPGER<br>SVSNSAAILRYQDQLKSDYVRSIMLYGSSPDYPTHSIADWGLQPTMSLRSEIISVQHLEPNESVG<br>YGSNFVAEQPMTIGIVACGYADGYQRISPTGTPVLVDSVTRTRTVGRVSMMLAVDLTGIESAKV<br>GSEVVLWQSSSTGVILPIDDAVSSGTVGYELMCAVTARVQFINQV<br>MSDFIQLEYLQEKLQQLLAESLFAIYLYGSAVDGGLGPESDLVLLVVTQPLTSALREQLAQELL<br>KISQPVGELQRPLEVITILLKDEIQSGNPLSYEMQFGEWLREELKEGGTSSQKDPDISILLRKARF<br>HHAVLFGPALDQW APEISDQELWQAMSDTYEIVAHWDEDADERNQILALCRIYFSLVMKDIAS<br>KDNAARVWKSQLPPEQKFLVLRLIQYRGEIGKQNWQEEHYALQPIVNFSSKIEEQFEQKRNL<br>MKNYFTCYVVASLFLSGCTVQHNLINEPQIVQGHNVQVIHQYFDEKNTSGVLVIQTDKKNINLY<br>GNALSRANTEYVPASTFKMLNALIGLENQKTDINEIFKWKGEKRSFTAWEKDMTLGEAMKLSA<br>VPVYQELARRIGLDLMQKEVKRIGFGNAEIQGVDFNLVGLPKVTPIQEVEFVSQLAHTQLPFS<br>EKVQANVKMMLLLEESNGYKIFGKTGWAMDIKQVGVLTGWVVEQPDGKIVAVALNMEMRSE<br>MPASIRNELLMKSLKQLNII<br>MNLPTTMKIVEITVPGGPEVLKQLQSDSNVVPQADEVLIEVKAAGINRPDVLQRMGLYPMPKGV<br>QIPGLEVAGVVAVGEVQVQKFGDKVCALTNNGGYAEYCAVATQVLPDENLSTQAAAPE<br>TFFT VWANLFDIGRLKDEALIHGGASGIGTTALAICHALGIKTFATVGSSEKVEALSDLTTAIN<br>YKTQDFEQEILNHTQEQQVDVILDVIGGSYFQKLNLLKRDGRLVIIGFMGGRIAKEFDLQKLILK<br>RATITGSTMARNRSQEKAQIAQSLHEHVWPLLAQGGKCLPQIYKTYAFSDVQSAHACMEQGDHIG<br>KIVLEMNA                                                                                                                                                                                                                                                                                                                                                                                                                                                                                                                                                                                                                                                                                                                                                                                                                                                                                                                                                                                                                                                                                                                                                                                                                                                                                                                                                                                                                                                                                                                                                                                                                                                                                                                                                                                                                                                                                                                                                                                                                                                                                                            | 0.4001897 | 0.001655058 | down |
| A0A0E1PVE6 | Nucleotidyltransferase superfamily                         | 33 | 6  | 15  | 1  | 30.2 | MSDFIQLEYLQEKLQQLLAESLFAIYLYGSAVDGGLGPESDLVLLVVTQPLTSALREQLAQELL<br>KISQPVGELQRPLEVITILLKDEIQSGNPLSYEMQFGEWLREELKEGGTSSQKDPDISILLRKARF<br>HHAVLFGPALDQW APEISDQELWQAMSDTYEIVAHWDEDADERNQILALCRIYFSLVMKDIAS<br>KDNAARVWKSQLPPEQKFLVLRLIQYRGEIGKQNWQEEHYALQPIVNFSSKIEEQFEQKRNL<br>MKNYFTCYVVASLFLSGCTVQHNLINEPQIVQGHNVQVIHQYFDEKNTSGVLVIQTDKKNINLY<br>GNALSRANTEYVPASTFKMLNALIGLENQKTDINEIFKWKGEKRSFTAWEKDMTLGEAMKLSA<br>VPVYQELARRIGLDLMQKEVKRIGFGNAEIQGVDFNLVGLPKVTPIQEVEFVSQLAHTQLPFS<br>EKVQANVKMMLLLEESNGYKIFGKTGWAMDIKQVGVLTGWVVEQPDGKIVAVALNMEMRSE<br>MPASIRNELLMKSLKQLNII<br>MNLPTTMKIVEITVPGGPEVLKQLQSDSNVVPQADEVLIEVKAAGINRPDVLQRMGLYPMPKGV<br>QIPGLEVAGVVAVGEVQVQKFGDKVCALTNNGGYAEYCAVATQVLPDENLSTQAAAPE<br>TFFT VWANLFDIGRLKDEALIHGGASGIGTTALAICHALGIKTFATVGSSEKVEALSDLTTAIN<br>YKTQDFEQEILNHTQEQQVDVILDVIGGSYFQKLNLLKRDGRLVIIGFMGGRIAKEFDLQKLILK<br>RATITGSTMARNRSQEKAQIAQSLHEHVWPLLAQGGKCLPQIYKTYAFSDVQSAHACMEQGDHIG<br>KIVLEMNA                                                                                                                                                                                                                                                                                                                                                                                                                                                                                                                                                                                                                                                                                                                                                                                                                                                                                                                                                                                                                                                                                                                                                                                                                                                                                                                                                                                                                                                                                                                                                                                                                                                                                                                                                                                                                                                                                                                                                                                                                                                                                                                                                                                                                                                                                                                                                                                                                                                                                                               | 0.2788376 | 0.000837326 | down |
| A0A0F6SYM7 | beta-lactamase                                             | 75 | 19 | 427 | 1  | 30.9 | VPVYQELARRIGLDLMQKEVKRIGFGNAEIQGVDFNLVGLPKVTPIQEVEFVSQLAHTQLPFS<br>EKVQANVKMMLLLEESNGYKIFGKTGWAMDIKQVGVLTGWVVEQPDGKIVAVALNMEMRSE<br>MPASIRNELLMKSLKQLNII<br>MNLPTTMKIVEITVPGGPEVLKQLQSDSNVVPQADEVLIEVKAAGINRPDVLQRMGLYPMPKGV<br>QIPGLEVAGVVAVGEVQVQKFGDKVCALTNNGGYAEYCAVATQVLPDENLSTQAAAPE<br>TFFT VWANLFDIGRLKDEALIHGGASGIGTTALAICHALGIKTFATVGSSEKVEALSDLTTAIN<br>YKTQDFEQEILNHTQEQQVDVILDVIGGSYFQKLNLLKRDGRLVIIGFMGGRIAKEFDLQKLILK<br>RATITGSTMARNRSQEKAQIAQSLHEHVWPLLAQGGKCLPQIYKTYAFSDVQSAHACMEQGDHIG<br>KIVLEMNA                                                                                                                                                                                                                                                                                                                                                                                                                                                                                                                                                                                                                                                                                                                                                                                                                                                                                                                                                                                                                                                                                                                                                                                                                                                                                                                                                                                                                                                                                                                                                                                                                                                                                                                                                                                                                                                                                                                                                                                                                                                                                                                                                                                                                                                                                                                                                                                                                                                                                                                                                                                                                                                                                                                                                                                                                                                                                                                                      | 0.3504038 | 0.029209816 | down |
| A0A0G4QU89 | NAD(P)H quinone oxidoreductase, PIG3 family protein        | 51 | 14 | 50  | 1  | 35.9 | MNLPTTMKIVEITVPGGPEVLKQLQSDSNVVPQADEVLIEVKAAGINRPDVLQRMGLYPMPKGV<br>QIPGLEVAGVVAVGEVQVQKFGDKVCALTNNGGYAEYCAVATQVLPDENLSTQAAAPE<br>TFFT VWANLFDIGRLKDEALIHGGASGIGTTALAICHALGIKTFATVGSSEKVEALSDLTTAIN<br>YKTQDFEQEILNHTQEQQVDVILDVIGGSYFQKLNLLKRDGRLVIIGFMGGRIAKEFDLQKLILK<br>RATITGSTMARNRSQEKAQIAQSLHEHVWPLLAQGGKCLPQIYKTYAFSDVQSAHACMEQGDHIG<br>KIVLEMNA                                                                                                                                                                                                                                                                                                                                                                                                                                                                                                                                                                                                                                                                                                                                                                                                                                                                                                                                                                                                                                                                                                                                                                                                                                                                                                                                                                                                                                                                                                                                                                                                                                                                                                                                                                                                                                                                                                                                                                                                                                                                                                                                                                                                                                                                                                                                                                                                                                                                                                                                                                                                                                                                                                                                                                                                                                                                                                                                                                                                                                                                                                  | 2.2629758 | 0.000559363 | up   |

|            |                                                            |    |    |     |    |       |                                                                                                                                                                                                                                                                                                                                                                                                                                                                                                                                                                                                                                                                                                                                                                                                                                                                                                                                                                                                 |           |             |      |
|------------|------------------------------------------------------------|----|----|-----|----|-------|-------------------------------------------------------------------------------------------------------------------------------------------------------------------------------------------------------------------------------------------------------------------------------------------------------------------------------------------------------------------------------------------------------------------------------------------------------------------------------------------------------------------------------------------------------------------------------------------------------------------------------------------------------------------------------------------------------------------------------------------------------------------------------------------------------------------------------------------------------------------------------------------------------------------------------------------------------------------------------------------------|-----------|-------------|------|
| A0A0H4UME6 | Outer membrane protein transport protein (OMPP1/FadL/TodX) | 57 | 14 | 74  | 11 | 46.5  | MKLKHLSTAMILATLPATGVFAAALDRSGQSMSAFFQPGNYFEAGISVLDPPDVSGKDTSGNATGDMANDYYFPSAALKLQLTDKFSFGLLYDQPFQSDSEYSGKNNFVANPNDRLLPSPASPTLQGAGLGNTITGGTSVEVDTQNLALVFGFQPTVNWNIYGGGVYQTIKGNVHLRGSAYSLYNGYDADIKETGGAGWLAGVAYQIPEIALKASLYRSEIDHDVNIKENIPIVNLVAANPALLFGALGITDPATQA AIGKQLASLQSDGKTTITTPQSVNLDQFTGIMANTVAFANVRVWNWKFVAVQPYKFGIVSKAA GQLLPQLGKPNGFNLYDYSDQWVSVTAGVGRKLNKDWAGNVSVGWSDGAGNPVTTLGPTEG YWNVGLGVQYSPTPQTFIAGGVKYFWLGDADAVTGAHSAAGTFDDNNAIAYGLKLGKYP                                                                                                                                                                                                                                                                                                                                                                                                                                                                                                                                     | 6.7126771 | 0.004824438 | up   |
| A0A125S0J9 | Dihydropteroate synthase                                   | 80 | 15 | 70  | 2  | 30.3  | MSYFLSCTEIIIEAPMNKSLIIFGIVNITSDSFSDDGGRYLAPDAAIAQARKLMAEGADVIDLGPASS NPDAAPVSSDTEIARIAPVLDALKADGIPVSLDSYQPATQAYALSRGVAYLNDIRGFPDAADFYPQ LAKSSAKLVVMHSVQDGGADRREAPAGDIMDHIAAFFDARIAALTGAGIKRNRLLVDPGMGFFL GAAPETSLSVLARFDELRLRFDLPVLLSVSRKSFRLRALTRGRPGDVGAATLAAELAAAAGGADFI RTHEPRLRDGLAVLAALKETARIR                                                                                                                                                                                                                                                                                                                                                                                                                                                                                                                                                                                                                                                                                            | 2.6269742 | 0.000331783 | up   |
| A0A1B1LW15 | histidine kinase                                           | 12 | 1  | 1   | 1  | 15.6  | SHGDLSARAYDNRIHSAEMSELLYNFNMDMAQKLEVSVKNAQVWNAIAAHELRTPTILQGRLLQG IIDGVFKPDEVLFKSLLNQVEGLSHLVEDLRTLSLVENQQLRLNYELFDLKAVVEKVLKAFEDRL DQAKLVPE                                                                                                                                                                                                                                                                                                                                                                                                                                                                                                                                                                                                                                                                                                                                                                                                                                                    | 0.2990488 | 0.000392103 | down |
| A0A1E3M652 | Isocitrate dehydrogenase [NADP]                            | 69 | 23 | 138 | 2  | 45.6  | MGYQKIVVPADGDKITVKADLSLNVNPHIIPFIEGDGIGVDITPTMKKVVDAAAILKAYGGKRSIE WMEVYCGEKANKIYGYMPEETFEALREFVVSIIKGPLTTPVGGGIRSLNVALRQELDLYVVCVRP VRFWFQGVPSPVQHPQLTDMVIFRESEDIYAGIEWKADSEEAKKVIKFLQEEEMGVTKIRFPEGCG IGIKPVSKEGTQRLVRKAIQFAIDNDKPSVTLVHKGNIMKYTEGAFKEWGYELALDRFGGELIDG GPWWKIKNPKNKGDIHKDVIADAFLLQQLMRPADYSVIATLNLNGDYISDALAAEVGGIGIAPGA NIGGAIAYVEATHGTAPKYAGQDKVNPGSIIISAEMMLRDMGWIEAADLIKIGSIAIAAKTVTY DFERLMPGATLLRCSEFGDAIHQHMED                                                                                                                                                                                                                                                                                                                                                                                                                                                                                                                                                        | 8.6604865 | 0.039514455 | up   |
| A0A1E3MB56 | Neutral zinc metallopeptidase                              | 57 | 10 | 28  | 2  | 33.0  | MRWKGRRVSTNVEDRRGGGGVRAGGISIIGLVVAFVAWKFFGVDPQQAQYQATQQVTSQSQSN ATAPESLTAEQKEASDFIRTIADTEDTWTPIFKQLGKTYTPPKLVLFVSGMIQSGCGTAQSAMGPF YCPADQKVYIDTEFFKDMREQMGISGEQNQTELSRQDQAGDFAQAYVVAHEVGHVQTLLGIS SQVQARAQVSQREGNQLSVRQELQADCLAGIWANHNQRTQFLEQGDVEEAMDAAQKIGDD YLQKRATGQVVVPSFTHGSSEQRMHWFQVGLKTDGDISQCDTFNNSI                                                                                                                                                                                                                                                                                                                                                                                                                                                                                                                                                                                                                                                                                  | 9.7628866 | 0.003294874 | up   |
| A0A1E3MBC2 | Geranylgeranyl diphosphate synthase                        | 61 | 13 | 54  | 1  | 35.6  | MVIDFKQDILAPVATDFAAMDHLINELGSSKVLVMSVSKHVVEAGGKMRPIMCLLAARACDL DNMQNAQRLAIIEMLHTATLVHDDVVDESGLRRGRPTANATWNNQTAVLVGDFLIARAFDILL VDLNNMTLLKDFSTGTCEIAEAGEVLQQLSQSQHPDTEETLYLKIHGKTSRFLFELATEGAAILAGQE AYREPLRLFAGHFGNAFQIIDDILDYTSDAETLGNIGDDLMGKPTLPLISALAHSTGEEHAIRR SIATGGVDQLPKVIEIVQKSGALDYCQRRAQEETEAALQALSILPDTPYRQALINLTRLALHRIQ MQLYDKKIIFILPMLAAMVAVSGCQPKSTAKDEQLASSASVKEQKQAEVPIQAKVVPVKLPKP KVCLEDGCTEYDFQTVQTNQK WINDYFTNRIKADPNAFANLADKPVVEPEGEPSSSQAIVR YLGGQYNLATAFQTYSSAGA AHGMSHQEFVNFLLNKKHITVEELKPDVEKQLVDALFDA NTNWLQEHNISREKLQLSDNFYYGANGIVFVYPIYELASYAEGMSELTLPYFEAAKYIKPEYLP                                                                                                                                                                                                                                                                                                                                                                                             | 5.7546712 | 9.66E-07    | up   |
| A0A1E3MBE0 | DUF3298 domain-containing protein                          | 45 | 7  | 24  | 1  | 29.6  | MRVIVLGGSGVIGVASAYLARQGAEVTVLDRQSGPAEETSFGNAGQISPGYSTPWAAPGIPFKA VKWMFQHHAPLAINLDGSMWQLQWMAQMLKNCNPQSYAVNKERMMRVAEYSRDCLRELK DTDGHIYENRAKGTLLQFRKEAQMEAVQRDISVLEECGVSYELLNGNELGRVPEPALANAQDKLV GGLHLPNDETGDCYLFTNALAQIAKELGVNFQFNQNVKELIVEGDEIKGVQVNGKVLTDADRYV LAFGSYSRDFLKLPLDLQPVYYPVKGYSLTIPIVDPAFAPQSTVLDETYKIAITRFQIRIRVGGMAE LSGFNLGLNEDRRATLQMVTDLFPFGDMEQASFWTGLRPMPDSTPIIGATRFKNLFLNTGHG TLGWTMACGSGKLISDIVLNHKTDISTDGLSIQRYSHAHAA                                                                                                                                                                                                                                                                                                                                                                                                                                                                                                                                                    | 4.0746296 | 0.017079326 | up   |
| A0A1S2FL61 | D-amino acid dehydrogenase                                 | 73 | 21 | 145 | 1  | 46.5  | MTDAQTAQNIATTYDPTIEKKWYKTWEEOGYFKPSGHGESFCMIPPPNVTGSLHMGHGFNN AIMDALTRYNRMMGKNTLWQPGTDHAGIATQMVVERQLGLQGITRHDLGREKFIKVVWEWKE QSGGTITKQIRRLGSSVDWSRERFTMDEGLSNAVKEVVRHLHEDGLIYRGKRLVNWDPKLTAL SDLEVESKEEKGSLWHFKYFFEDKSVKTDQDGKDYLVVATRPETLLGDTAVAVHPEDERYAHL VGNIVLPITGRIPVADDYVEKDFGTGCVKITPAHDFNDYELGKRNSLPIINIFNKNAEVLGFEFE YIATAGEQISKTTAPADYAGLERFEARKKLVAAQAEAGWLDQIQPYDLKAPRGDRSGVIEPLLT DQWYVKIVPLAEPALAEVVDGRIKVFPEQYSNMMAWMRDIQDWCISRQLWWGHRIPAWYDA NGNIYVGRSEEEVRAKNIAADVELKQDEDVLDTWFSALWTFSTLWPEQTPELKTFHPTDVL VTGFDIIFVWARMIMMTMHFMKNEDGSSQIPFKTVYVHGLVRDGEQKMSKSKGNVLDPLDL IDGIDLESVAKRTTGLMNPKDAKIEKSTRKEFPEGINAYGTDVAVRFTFCALANTGRDIKFDLK RVEGYRNFCKIWNATRFVLMNVEGQTVGQEARPDLWELPEQWIIISRLQKAEAAVHQAFATYR LDLAAQAIYDFIWNEYCDWYVELTKPVLNDAEVSEERKAEVRRVLLAVMEASRLRAHPLMPYL TEEIWQTLAPMLGQGGPTIMTAQYPIPEQAKINEQAEADMQWLQGLIGAVRNIRGEMGLGNAR LLPVLLQNISDAEREQITRIEALFKALAKVESIEFLGKQDEPPLSSSSVVGHASVFPVMPKGLIDPKA ELGRLQKDLDKIQKHQDIANKLANEGFVSKAPAAVVEGEKAKLAFAAQLDKVKANMEQIAA L | 0.1655451 | 0.016840737 | down |
| A0A1S2GAH7 | Valine--tRNA ligase                                        | 53 | 41 | 173 | 1  | 108.6 |                                                                                                                                                                                                                                                                                                                                                                                                                                                                                                                                                                                                                                                                                                                                                                                                                                                                                                                                                                                                 | 2.7973084 | 0.000989203 | up   |

|            |                                         |    |    |     |    |      |                                                                                                                                                                                                                                                                                                                                                                                                                                                                                                                                                                                                                                                                                                                                                                                                                                                                                                                                                                                                                                                                                                                                                                                       |           |             |      |
|------------|-----------------------------------------|----|----|-----|----|------|---------------------------------------------------------------------------------------------------------------------------------------------------------------------------------------------------------------------------------------------------------------------------------------------------------------------------------------------------------------------------------------------------------------------------------------------------------------------------------------------------------------------------------------------------------------------------------------------------------------------------------------------------------------------------------------------------------------------------------------------------------------------------------------------------------------------------------------------------------------------------------------------------------------------------------------------------------------------------------------------------------------------------------------------------------------------------------------------------------------------------------------------------------------------------------------|-----------|-------------|------|
| A0A1S8V5S4 | Long-chain fatty acid transport protein | 13 | 6  | 27  | 1  | 53.2 | MKLKHLSTAMILATLPATGVFAAALDRSGQSMSAFLQPNNYFEAGISVLDPDVAGKEAGVSATR<br>RDISDMGNDYYFPNAALKLQLTDKFSFGLLYDQPFGADA EYSGQNVFVSDPSNTILAPAALDAIR<br>TSTIDTTFNNLTADQRVGAALQAQGVNLSTPEGKAQFAATLTAYNSNPATKA AIDAGVKQGV<br>AKVDAGIKQINGLLGTGNTKVKVDTQNL SFVFGFQPTQNWNIYAGGVYQTVKGNVSLRGQAYS<br>IYNGYDADIKETGGAGWLAGVAYQIPEIALKASLTYRSEIDHDVNIREKIPTLPALLGQDAAA<br>AAIANSSADTTTTTPQSVNFDFTGIMANTVAFANVRWVNWKDFSIQPYKFGQLSKVVGPLADP<br>RRPNGFNLVEYSDDQWSVNAGVGRKLN DKWAGNVSVGWSDGAGNPVTTLGPTEGYWNVGL<br>GVQYSPTPQTFIAGGVKYFWLGD AKAQTGAQAGSDQYVADFSDNDAIAYGLKLGYKF                                                                                                                                                                                                                                                                                                                                                                                                                                                                                                                                                                                                                                    | 0.3513625 | 0.001805428 | down |
| A0A1T0DRB8 | TetR family transcriptional regulator   | 21 | 4  | 8   | 1  | 24.2 | MTNRHETDLVNEEDTLKKKRGRPKCFDEQQVLEKAMLLFWEHGYEATSISDLTHALEITAPSLYS<br>AFGDKAGLFYKSIDYLAHEACPIETIFLEAKTAKIAFELYLDNVKRLVQPNKPAGCMLVVAA<br>MNCSDATQEVQQNLLDKRIKTKELLLKRLEQGV EQGDLPTNAPLQEMTDFYATVIQGLTIQARD<br>GANTEQLHKVVEHAMKAWTLF                                                                                                                                                                                                                                                                                                                                                                                                                                                                                                                                                                                                                                                                                                                                                                                                                                                                                                                                                     | 2.9054455 | 0.000158422 | up   |
| A0A241ZE65 | 5-oxoprolinase subunit A                | 43 | 7  | 22  | 7  | 26.9 | MFVDLNSDLGESFGSWKMGNDQILPVVTSANACGFHAGDPLGILKTVRKA VELGVTIGAHVS<br>YDDL VGFGRRNMDLSRDELIADVLYQISALDGLAKVAGSKVQYVVKPHGALYNTIAHDQAAAA<br>VIDAIKMYNP ELLVALAGSNLVEQARAAGLKVVSEAFADRAYNSDGLSVSRRELEGAVLHDSGF<br>VASRVVSMKNGGVESIDGVFTPIQADTICLHGDTDGALEM SAAIKAELVKNNIEIRPFV NKA<br>MDLFLNRKSFVVKSLAITVTALMMSGANAATSDKEIRKLRQEVEALKALVQEQRQVQQQQQ<br>VQQQQVQLAEVKAQPQVVAAPV SPLAGFKSKAGADVNL YGfVRGDANYIIEGADNDFGKVA<br>ESKGEATDKIRATAKTTRLGLDFTAPVNDAKVGGKLEVDFA GSTTDSNGSLRVRHAYVTYNNW<br>LFGQTTSNFLANHAPEMIDFSTNIGGGTTRVPQVRYNYKLGPTTQLFVAEKGDSTGLTGTKDK<br>DNNWVNDSIKYSPLVLTAKITQGYADGKGSASARALVENYKSKAGGDNQTGWGVAVGTDFKV<br>SDPLKLFADASYVVGNSNYLYGSNKAYTVVDGDIEQNK FVAVQVGGTYKILPNLRSTLAYGAQ<br>FADDGTDYATAYKDGNEK VQAWINFIYTPVKPIDLGV EYVNGKRDTFDGKSYKDNRVGLMA<br>KYSF<br>MTVVGTRPEIHRLSRVMAACDEYFDHILVHTGQNYDYELNEIFFTDLGIRKPDHFLNAAGATGAE<br>TIGNVIIAVDKILEEVQPEALLVLGDTNSCMAVLP AKRRKIPTFHMEAGNRCFDMRVPEEINRRIV<br>DHTADINLTYSTIARDYLLAEGLPADLVIKTGSPMFEVLH HYKAKIEASDVLRLNLKEHEFYIVS<br>AHREENINSDQNFLDLVEMLNAVADKYKYPVIVSTHPRTRKRIEELNVEFHPLIQLL KPLGFSDY<br>NKLQLSAKAALSDSGTINEESSILNFPALNLRQAHERPEGMEEAAVMMVGLKAERILQGLAILEG<br>QTRGENRLLRLVEDYSMPNVSEKVVRIIMS YTDYVNRVIWKQF | 2.0656034 | 0.044210776 | up   |
| A0A241ZJ54 | DcaP-like protein                       | 61 | 23 | 121 | 13 | 48.1 | MQKQVWSISGHSIAVSALALALAACQSMRGPEPVKTDIPQSYAYNSASGTSIAEQGYKQFFADP<br>RLEVIDLALANNRDLRTATLNIERAQQYQITQNNQLPTIGASGSAIRQVSQSRDPNPNYSTYQ<br>VGLGVTAYELDFWGRVRSLKDAALDSYLA TQSARDSTQISLISQVAQAWLNYSFATANLRLAEQ<br>TLKAQLDSYNLNKKRFVDVGDSEVPLRQAQISVETARNDVANYKTQIAQAQNLNLLVGPVPQ<br>NLLPTQPVKRIAQQNVFTAGLPSDLLNRPDVKA AEYNLSAAGANIGAAKARLFPITSLTGSAGY<br>ASTDLSDLFKSGGFVWSVGPLDLPIFDWGT RRANVKISETDQKIALSDYEKSVQSAFREVNDAL<br>ATRANIGERLTAQQLVEATNRNYT LSNARFRAGIDSYLTVLDAQRSSYAAEQGLLLLQANLN<br>NQIELYKTLGGGLKANTS DTVVHQPSAELKKQ                                                                                                                                                                                                                                                                                                                                                                                                                                                                                                                                                                                                                                                          | 5.6146577 | 0.029855992 | up   |
| A0A2U9QFX2 | FnlC                                    | 47 | 11 | 52  | 3  | 42.1 | MLDREILLKWLDEYLLANKSNETIYTLKNSLNLFF EYTNLAL EEEIASDIRTFIAYRAQNGVGV S<br>TLKKNISAIRFFFHYLTKEK LINFPAEDIKIKSSKVL PKFHEVTVINEVLDSNKNLEFERPSTVI<br>FKRD LALIEIAYSCGLRLEEIHS LQIENVEVKRKQVRVTGKGNKTRIPLGSKAIEAYLEWLP LREE<br>IMNKDTNQKHNYVFVTTTGAQLSRVQINKRIKNAFKLAGYPIQSNPHMLRHSFATHLINSVGIR<br>EIQEMLGHSNLNTTQIYTDLDHTSMTNVYMDTHPRAVKNTEGEN                                                                                                                                                                                                                                                                                                                                                                                                                                                                                                                                                                                                                                                                                                                                                                                                                                              | 0.213308  | 0.009596458 | down |
| A0A380V1V9 | Outer membrane efflux protein           | 75 | 25 | 137 | 1  | 52.8 | MNTEKLLIANRGEIAVRIIHACRDMG IASVALYADDDINSMHVELADEAWGLAGATASETYLNI<br>PAIIEVAKKSKATMVHPGYGFLSERA EFAQAVIDAGLKWVGPSPSAIEKLGDKIEARKIAASVGA<br>PLVQGTQDPLNNAEEALEFAKQYGLPIA IKA AFGGGGRGLKVAWKLEEVKELYESAVREAKAA<br>FGRGECFVEQYLDKPRHVEAQVIADQHGNIVVLGTRDCSLQR RNQKLVEEAPPFISDEIYQIL<br>SSAKNICQAANYVGAGTVEYLLSRDGLKSLFLEVNTRLQVEHPVTEETSKVDLVVEQIRVAQGEV<br>LSIKETPKAQGHAIEFRINAEDPARGFIPAFGVLSLFEAPFGHGVRVDTGVRTGSLVSSHFDSLMA<br>KLVSGPTREVAIARAKRALKQFKIEGVASV LDFHRAVLNPEGFTDEFNVHTRWIENDFKQELKP<br>TKRGIPNHQQPMLLSYIEIDGK LHLRGLPAGMFAQGPATAVQAQIAEPEVSAEHL LAPIINGVISA<br>WKVENGEQVTEGQVVAIMEAMKMEVQVLAHRSGVIQIGA EKGTTC HAETVIASIH                                                                                                                                                                                                                                                                                                                                                                                                                                                                                                                                                 | 0.3613512 | 0.007524025 | down |
| A0A385ER43 | Int                                     | 20 | 5  | 9   | 5  | 35.8 | MRPSLLPGTPMTVIPTIDIVDALAAEYAAKSPREILELALSQQGEIAISFSGAEDVVLDIASRLGKP<br>FRVFSLDTGRLHPETYQFIETVRKHYNINIEICFPDAEAVQSMVNEKGLFSFFKDGHQECCGIRKV<br>QPLRKKLATLDGWITGQRKDQSPGTRTEIPVLQADAGFSGPGKQLIKYNPLANWSSADVWSYIR<br>MMEIPYNPLHERGFV SIGEPCPTRPVLPNQHEREGRWWWEEATQKECGLHAGNLKK                                                                                                                                                                                                                                                                                                                                                                                                                                                                                                                                                                                                                                                                                                                                                                                                                                                                                                            | 2.9185192 | 0.026565133 | up   |
| A0A385EU35 | Biotin carboxylase                      | 43 | 20 | 61  | 3  | 62.0 |                                                                                                                                                                                                                                                                                                                                                                                                                                                                                                                                                                                                                                                                                                                                                                                                                                                                                                                                                                                                                                                                                                                                                                                       | 2.2215249 | 0.02693144  | up   |
| A0A3F3MQT9 | Adenosine 5'-phosphosulfate reductase   | 63 | 12 | 38  | 1  | 28.5 |                                                                                                                                                                                                                                                                                                                                                                                                                                                                                                                                                                                                                                                                                                                                                                                                                                                                                                                                                                                                                                                                                                                                                                                       | 5.0298294 | 0.025259277 | up   |



|            |                                                                |    |    |     |    |       |                                                                                                                                                                                                                                                                                                                                                                                                                                                                                                                                                                                                                                                                                                                                                                                                                                                                                                                                                                                                                                                                                                                                                                                                                                                                                                                                                                                                                                                                                                                                                                                                                                                                                                                                                                                                           |           |             |      |
|------------|----------------------------------------------------------------|----|----|-----|----|-------|-----------------------------------------------------------------------------------------------------------------------------------------------------------------------------------------------------------------------------------------------------------------------------------------------------------------------------------------------------------------------------------------------------------------------------------------------------------------------------------------------------------------------------------------------------------------------------------------------------------------------------------------------------------------------------------------------------------------------------------------------------------------------------------------------------------------------------------------------------------------------------------------------------------------------------------------------------------------------------------------------------------------------------------------------------------------------------------------------------------------------------------------------------------------------------------------------------------------------------------------------------------------------------------------------------------------------------------------------------------------------------------------------------------------------------------------------------------------------------------------------------------------------------------------------------------------------------------------------------------------------------------------------------------------------------------------------------------------------------------------------------------------------------------------------------------|-----------|-------------|------|
| A0A5K1MHI6 | Uncharacterised protein family, zinc metallopeptidase putative | 57 | 9  | 27  | 1  | 33.0  | MRWRDRRVSTNVEDRRGGGGVRAGGSIIGLVVAVFAWVKFFGVDPQQAYQATQQVTASQQSN<br>ATAPESLTAEQKEASDFVGTVLADTEDTWTPIFKQLGKTYTPPKLVLFSGMIQSGCGTAQSAMG<br>PFYCPADQKVYIDTEFFKDMREQMGISGEQNTQLSRQDQAGDFAQAYVVAHEVGHVQTLTG<br>ISSVQVQARAQVVSQREGNQLSVRQELQADCLAGIWANHNNQRTQFLEQGDVEEAMDAQAQKIGD<br>DYLQKRATGQVVLDSFTHGSSEQRMHWFQVGLKTGDISQCDFNNSI                                                                                                                                                                                                                                                                                                                                                                                                                                                                                                                                                                                                                                                                                                                                                                                                                                                                                                                                                                                                                                                                                                                                                                                                                                                                                                                                                                                                                                                                                | 0.1788883 | 0.000985786 | down |
| A0A5K1MJJ7 | Outer membrane protein<br>Omp38                                | 46 | 17 | 358 | 2  | 38.5  | MKLSRIALATMLVAAPLAAANAGVTVTPLLGYTFQDSQHNNGGKDGNLTNAPELQDDLFGA<br>ALGIELTPWLGFEAEYNQVKGDVDGASAGAEYKQKQINGNFYVTSDLITKNYDSKIKPYVLLGA<br>GHYKYDFDGVNRGRTRGNEEGTLGNAGVGAFAWRLNDALSLRTEARATYNADEEFWNYTALAG<br>LNVVLGGHLKPAAPVVEVAPVEPTPVAPQPQLTEDLNMELRVFFDTNKSNIKDQYKPEIAKVA<br>EKLSEYPNATARIEGHTDNTGPRKLNRLSLARANSVKSALVNEYNVDASRLSTQGFQAWDQPIA<br>DNKTKEGRAMNRRVFATITGSRTVVVQPGQEAATPAAAQ                                                                                                                                                                                                                                                                                                                                                                                                                                                                                                                                                                                                                                                                                                                                                                                                                                                                                                                                                                                                                                                                                                                                                                                                                                                                                                                                                                                                                    | 5.8857718 | 4.39E-07    | up   |
| A0A5K1MJT9 | Flavoprotein-like superfamily                                  | 53 | 5  | 9   | 1  | 20.1  | MSNSNIAVVYFSGYGHTKVVAETAFANEINAQLIQIDQEGNITDQDWETLNNAKGIVFGAPTYMG<br>TAPWQFKKFADATSKVWFTRGWQDKVAFGFTNSASLNGDKQVTLIQLQTLASQHGGIWVSLGL<br>LPANTKDATREDVNNLGGVGLLVQSPSDASVDEVPTGDLETAKVYAKRVQAIVNKIYG<br>MNNTQSAAMPLVENEVNLDSIVEQSQRIARNEEHSRAKSLIGELAKEVMAGTITVSENMTLSI<br>DKRIAIDALISKQLSQIMHNEQFQKIESTWRGLYYFCQETPSNPLIKIRMLNNTTKKELVKDFQGA<br>TDFDQSTLFFKIIYEEYGSFGGAPYSALIGDFEDRTPSDMYLLEQISHVSAHAHAPFISAASPSIL<br>GLESFTDIDRPRDVKIFETAEYVQWRFRDSEDSRYVALTLPHVLGRLPYHPKEGTATEGFNFI<br>DVSGENHNEYLWMNAAYAFGTRLTNAFDMHGWCAAIRGVEGGGLVEGLPVHTFKTQDGEVV<br>FKCPTAIAITDRREKELSDLGFIPLVHCKNTDYAAFFGAQSTQPKKYDNDTANANSALSSQIYI<br>MAVSRIAHYLKAMMRDKVGSFASAGNVEAFLNEWLSQYVLLDDGASQEAQAQYPLREASVKV<br>VEDPAQPGHYKSVVFLRPHFQLDELVSRLRVTELPQSSN                                                                                                                                                                                                                                                                                                                                                                                                                                                                                                                                                                                                                                                                                                                                                                                                                                                                                                                                                                                                                                                                    | 4.1133094 | 0.006925691 | up   |
| A0A5P1UJC1 | EvpB family type VI secretion<br>protein                       | 33 | 13 | 23  | 13 | 55.3  | MSSKICIGTTADSITGFRSDLIKQLIVGYEVFAFTCEYNDKQLVEISALGAKPVTYKMSRGGLN<br>PFSDIKALFNLKSEIEKIKPDLVLSYFTKPVVYVYGLASKFSKVPKIIEMIEGLGTPPTEHNSGQSLKV<br>KFIKFFQITLYRLVFPFIDKIIFLNKDDPQDLIYKNKIKHKNNSVNLGPIGLNLDYPPYMKWQESS<br>TISFIFVARLIAEKGIFEFVAAKIVKQKYKDVRFIVIGLDTENPFGLSRTQLDDLIASGLIEYPGF<br>VTDVAKRIQDSAVFVLPSSYREGVPRSTQEAMAIGRPVITTDVPGCRETVENGVNGFLVPKWDP<br>EALAEKMCYFIENPEQVNMGLKSYEIAQEKFDAEKVNAKLIDIMGLKDLNEKTS<br>MAEIDMNTMDTFHQMDKSHQGYITEFNDKSEFEQRINTAWRRAEPEAVEELLQAAAASVDDLDH<br>KIYDLAFNLAHNLRERKTSKGAGIVQGLLQEFSLSSQEGVALMCLAEALLRIPDTATRDLRIRDK<br>INQGNWKEHVGQSSLMFVNAAAWGLMLTGKLMETPKQTSLSVLTGLLARSGRGIIRKAVDVA<br>MRMMGEQFVTGETIEEAVDHAKVLEDKGFYSYDMLGEEAALTDHDAERYFYNDYTAIHAIGK<br>ASNGKGVYDGPGISIKLSALHPRYQRAQIERVHKELYGKVFELARLAKQYNIGLNIDAEESEERLEI<br>SLELLERLCFEPELANWKGIGFVIQAYQKRCFFVVDYIIDLAKRSQKRLMIRLVKAYWDSEIKK<br>AQIEGMDDYPVFRKVTDLVSYIACAKKLLAAPEFIYPQFATHNAQTLATIYHLADPSKYAYAGQ<br>YEFQCLHGMGEPLYEQVVGPREQNKLGVPCRIYAPVGNHETLLAYLVRRLLENGANTSFVNRIA<br>DKTLKVEDLIQSPIYDIRNAAKLEGSVGLKHPSIPLDLMYGTLRKNSKGYDLANDTPLAALDST<br>AQELRNRIWQSHPLLANADSLQGHVSAITNPAQNDEIVGYVQEAADLKHVEIALTAAEQTQSEW<br>SNTPKDQRAQYLKHAADLMESRIQELMVLCCRESGKTYANAIAEVREAVDFLRYATQVENLP<br>ANTVIQPLGTVLCISPNWFLAIFSGQIAAALVSGNCVIAKPAEQTPLIAAQAVQILWEAGIPHGA<br>VQLLPGRGETVGAQLSQDSRINGIMFTGSTEVAKILQKTVAKRLSENGQSIPLIAETGGQNAMIV<br>DSSALTEQVVLVDVSSAFDSAGQRCALRILCVQEDSAATVIKMLKGAMQQLIVGNPAIKLTDIG<br>PVIDDEAKQTIDQHIQKMKSKGYPVHQLMFGATSQTELDKGTFFVPTAIELPNLDDLQREVFPG<br>VLHIITYKYGELEQLISRINAKGYGLTMGLHTRIDEITQTVIQHAEVGNLYINRNIVGAVVGVQPF<br>GGEGLSGTGPKAGGPLYMYRLMQHCSNKVLAATPFAVKNEQTIFEGFNREYVQSLQNWAKQHLP<br>QANREIEPFGVGKFYELQGPTGESNQYIILPRHRVLSIADTEQDQLHQLLAIFA VGSQAAMVMPNSP<br>LLAKHKQTLPKDVLDAITTIKNITDDDFDAVLHHGNREEIFSLQEQEIASRSGAIVGITHVEPNESIP<br>LERLVIERAISVNTAAAGGNASLMTMSE | 2.4499686 | 0.023928486 | up   |
| A0A5P3MF62 | Glycosyltransferase subfamily<br>4-like, N-terminal domain     | 8  | 2  | 2   | 1  | 43.6  | MSSKICIGTTADSITGFRSDLIKQLIVGYEVFAFTCEYNDKQLVEISALGAKPVTYKMSRGGLN<br>PFSDIKALFNLKSEIEKIKPDLVLSYFTKPVVYVYGLASKFSKVPKIIEMIEGLGTPPTEHNSGQSLKV<br>KFIKFFQITLYRLVFPFIDKIIFLNKDDPQDLIYKNKIKHKNNSVNLGPIGLNLDYPPYMKWQESS<br>TISFIFVARLIAEKGIFEFVAAKIVKQKYKDVRFIVIGLDTENPFGLSRTQLDDLIASGLIEYPGF<br>VTDVAKRIQDSAVFVLPSSYREGVPRSTQEAMAIGRPVITTDVPGCRETVENGVNGFLVPKWDP<br>EALAEKMCYFIENPEQVNMGLKSYEIAQEKFDAEKVNAKLIDIMGLKDLNEKTS<br>MAEIDMNTMDTFHQMDKSHQGYITEFNDKSEFEQRINTAWRRAEPEAVEELLQAAAASVDDLDH<br>KIYDLAFNLAHNLRERKTSKGAGIVQGLLQEFSLSSQEGVALMCLAEALLRIPDTATRDLRIRDK<br>INQGNWKEHVGQSSLMFVNAAAWGLMLTGKLMETPKQTSLSVLTGLLARSGRGIIRKAVDVA<br>MRMMGEQFVTGETIEEAVDHAKVLEDKGFYSYDMLGEEAALTDHDAERYFYNDYTAIHAIGK<br>ASNGKGVYDGPGISIKLSALHPRYQRAQIERVHKELYGKVFELARLAKQYNIGLNIDAEESEERLEI<br>SLELLERLCFEPELANWKGIGFVIQAYQKRCFFVVDYIIDLAKRSQKRLMIRLVKAYWDSEIKK<br>AQIEGMDDYPVFRKVTDLVSYIACAKKLLAAPEFIYPQFATHNAQTLATIYHLADPSKYAYAGQ<br>YEFQCLHGMGEPLYEQVVGPREQNKLGVPCRIYAPVGNHETLLAYLVRRLLENGANTSFVNRIA<br>DKTLKVEDLIQSPIYDIRNAAKLEGSVGLKHPSIPLDLMYGTLRKNSKGYDLANDTPLAALDST<br>AQELRNRIWQSHPLLANADSLQGHVSAITNPAQNDEIVGYVQEAADLKHVEIALTAAEQTQSEW<br>SNTPKDQRAQYLKHAADLMESRIQELMVLCCRESGKTYANAIAEVREAVDFLRYATQVENLP<br>ANTVIQPLGTVLCISPNWFLAIFSGQIAAALVSGNCVIAKPAEQTPLIAAQAVQILWEAGIPHGA<br>VQLLPGRGETVGAQLSQDSRINGIMFTGSTEVAKILQKTVAKRLSENGQSIPLIAETGGQNAMIV<br>DSSALTEQVVLVDVSSAFDSAGQRCALRILCVQEDSAATVIKMLKGAMQQLIVGNPAIKLTDIG<br>PVIDDEAKQTIDQHIQKMKSKGYPVHQLMFGATSQTELDKGTFFVPTAIELPNLDDLQREVFPG<br>VLHIITYKYGELEQLISRINAKGYGLTMGLHTRIDEITQTVIQHAEVGNLYINRNIVGAVVGVQPF<br>GGEGLSGTGPKAGGPLYMYRLMQHCSNKVLAATPFAVKNEQTIFEGFNREYVQSLQNWAKQHLP<br>QANREIEPFGVGKFYELQGPTGESNQYIILPRHRVLSIADTEQDQLHQLLAIFA VGSQAAMVMPNSP<br>LLAKHKQTLPKDVLDAITTIKNITDDDFDAVLHHGNREEIFSLQEQEIASRSGAIVGITHVEPNESIP<br>LERLVIERAISVNTAAAGGNASLMTMSE | 3.7225275 | 0.02816838  | up   |
| A0A5P6FNN8 | Bifunctional protein PutA                                      | 64 | 57 | 370 | 1  | 138.7 | MAEIDMNTMDTFHQMDKSHQGYITEFNDKSEFEQRINTAWRRAEPEAVEELLQAAAASVDDLDH<br>KIYDLAFNLAHNLRERKTSKGAGIVQGLLQEFSLSSQEGVALMCLAEALLRIPDTATRDLRIRDK<br>INQGNWKEHVGQSSLMFVNAAAWGLMLTGKLMETPKQTSLSVLTGLLARSGRGIIRKAVDVA<br>MRMMGEQFVTGETIEEAVDHAKVLEDKGFYSYDMLGEEAALTDHDAERYFYNDYTAIHAIGK<br>ASNGKGVYDGPGISIKLSALHPRYQRAQIERVHKELYGKVFELARLAKQYNIGLNIDAEESEERLEI<br>SLELLERLCFEPELANWKGIGFVIQAYQKRCFFVVDYIIDLAKRSQKRLMIRLVKAYWDSEIKK<br>AQIEGMDDYPVFRKVTDLVSYIACAKKLLAAPEFIYPQFATHNAQTLATIYHLADPSKYAYAGQ<br>YEFQCLHGMGEPLYEQVVGPREQNKLGVPCRIYAPVGNHETLLAYLVRRLLENGANTSFVNRIA<br>DKTLKVEDLIQSPIYDIRNAAKLEGSVGLKHPSIPLDLMYGTLRKNSKGYDLANDTPLAALDST<br>AQELRNRIWQSHPLLANADSLQGHVSAITNPAQNDEIVGYVQEAADLKHVEIALTAAEQTQSEW<br>SNTPKDQRAQYLKHAADLMESRIQELMVLCCRESGKTYANAIAEVREAVDFLRYATQVENLP<br>ANTVIQPLGTVLCISPNWFLAIFSGQIAAALVSGNCVIAKPAEQTPLIAAQAVQILWEAGIPHGA<br>VQLLPGRGETVGAQLSQDSRINGIMFTGSTEVAKILQKTVAKRLSENGQSIPLIAETGGQNAMIV<br>DSSALTEQVVLVDVSSAFDSAGQRCALRILCVQEDSAATVIKMLKGAMQQLIVGNPAIKLTDIG<br>PVIDDEAKQTIDQHIQKMKSKGYPVHQLMFGATSQTELDKGTFFVPTAIELPNLDDLQREVFPG<br>VLHIITYKYGELEQLISRINAKGYGLTMGLHTRIDEITQTVIQHAEVGNLYINRNIVGAVVGVQPF<br>GGEGLSGTGPKAGGPLYMYRLMQHCSNKVLAATPFAVKNEQTIFEGFNREYVQSLQNWAKQHLP<br>QANREIEPFGVGKFYELQGPTGESNQYIILPRHRVLSIADTEQDQLHQLLAIFA VGSQAAMVMPNSP<br>LLAKHKQTLPKDVLDAITTIKNITDDDFDAVLHHGNREEIFSLQEQEIASRSGAIVGITHVEPNESIP<br>LERLVIERAISVNTAAAGGNASLMTMSE                                                                                                                                                                                                                                                                                                                                                                                                                        | 2.0089836 | 0.024671946 | up   |
| A0A654L2G6 | Uncharacterized protein                                        | 16 | 1  | 4   | 1  | 14.8  | MGWEIPHFHFRVNGEPRVLAYLKPHASEAYTEELSYVYDLVNDDELNEYFNDEFTYNSNELRLF<br>YLQRPAEAFILWHPDQVHNQEIQFVYGVGIPNANRLTTIDIPEIPESFPHIFWDKTEDQ                                                                                                                                                                                                                                                                                                                                                                                                                                                                                                                                                                                                                                                                                                                                                                                                                                                                                                                                                                                                                                                                                                                                                                                                                                                                                                                                                                                                                                                                                                                                                                                                                                                                           | 3.9262415 | 0.000390981 | up   |
| A0A654L2Q2 | Uncharacterized protein                                        | 12 | 2  | 2   | 2  | 33.4  | MAGQIVLKSQNAIDNLADLPDINYYINRVKADGGVIYNNMALLDVFAFIYSKNITDSEVFSAINP<br>AWGVKDPATGNISKLYSLFDPAGDLNAFGGSLPIKLQNDLGVPSAYLGGSQNTYLKAAAGTVSG<br>VETIGYATAAVIPQLSNGAGAGTNPLGLLWSREAHDAADPVGSVTPYVAASWYVGRPDTSNI<br>TLSQWTEYFVSFSTGSAGSNALTYENAKPLSAFADTGGLRVYKNGLQVLFSDSTVTQTPPIHKD<br>KLELLIGATVTGTGAPATTYFLGHFIENWVLVNTASEKMIEISKRINDKYYAVIPH                                                                                                                                                                                                                                                                                                                                                                                                                                                                                                                                                                                                                                                                                                                                                                                                                                                                                                                                                                                                                                                                                                                                                                                                                                                                                                                                                                                                                                                                   | 2.3409555 | 2.46E-05    | up   |

|            |                                               |    |    |    |    |      |                                                                                                                                                                                                                                                                                                                                                                                                                                                                                               |           |             |      |
|------------|-----------------------------------------------|----|----|----|----|------|-----------------------------------------------------------------------------------------------------------------------------------------------------------------------------------------------------------------------------------------------------------------------------------------------------------------------------------------------------------------------------------------------------------------------------------------------------------------------------------------------|-----------|-------------|------|
| A0A654L3J1 | Carbohydrate porin                            | 51 | 15 | 80 | 1  | 46.0 | MVSVCLSVLITLQVQHAQAAAAFDPNQSWMLGDWNGQRTALQAQGYDFSGYTGEGYAGILDSK<br>QTSTHGSAYTGQALGSHLDLQKILGWQDTEAQITLTYRDGQSLSEHSPALAGHQSSVQEVWGR<br>EQTWRLTDLWIKKKFLDQKLDVKVGRFGEDEDFNSFDCDFQNLALCGSQVGNWVGDQWYNW<br>PVSQWAMRVKYNLQPDLYTQVGVVEYNPENLERGKGFNLSTDGSHGAIIPAEVWSPKLGVQS<br>MPGEYRLGYYYSTADAKEIADSTKTSHKQGVVWVTAQKQLFPADQTDRLTGFVNLTFHSDST<br>NKVDNMQNIQLVYKGLLNQRPQDELALGVARIHINDDWNQVQKEYDTEYNTELYYGIHATN<br>WLTIRPNVQYVRHVGVGALKNQDNTWVGGIKFSTAF                                              | 0.4709959 | 0.002939558 | down |
| A0A654L9F1 | Lipoprotein                                   | 49 | 8  | 11 | 8  | 20.5 | MKNLITAGFLLLAGCSTQKQPQSEPPYVKQNYSESDPAAKLSVSQFAGVVKSIYPAYQISHSND<br>GSEVKFLPNDVKADTKFMPNPNWYSIKIIKEPNTENWKGLIVEVFNKGSFGEKAVAAKDCQKI<br>FGNIDNRVPAVLYDLENRLNQSPNASISNRQYGYTFHLDASHYNQGYPVTCMVSN                                                                                                                                                                                                                                                                                                | 4.5513487 | 0.004238978 | up   |
| A0A6B9KPL0 | Gtr89                                         | 60 | 14 | 37 | 14 | 30.8 | MISLITATYNREKLLKLYESLCVQTVKKFEWIVIDGSDIKTDELINSFKLDNIIDITYLKKTNNGG<br>KHTAMNIGVELAKYAYVFFIDSDFLPNDISIEKIINYIDKVSAREDYSEISGVCGLIADFQGNLIGT<br>KYSENLCSSYIDYRYKYHIKGDKAEIFKREVLEVKFPVIEKEKFCPEALVWNRISDKYKMYFFN<br>EVIYYREYLEGGLSDRSVEIRKKAPISTLLYYKELYLNKLNWYYRIRAYINYMRFKFI                                                                                                                                                                                                                   | 5.1772935 | 0.015439332 | up   |
| A0A6B9KQE9 | Gtr93                                         | 19 | 7  | 9  | 7  | 41.4 | MRILYVITGLGGGAEKVVCDLADEMCSRGHIVKIAYLKGEIVVFPKNKEIELVYLGLSILNALS<br>FFRNYRDLIISFTPDVVHSHMVHANIFTRISRKFYSIPKLICTAHSSNEGSKFRMLAYNFTHNLADL<br>TTNVSLEASRNFEIRKGVPKGGIRTIYNGIDLKSKFIKSPLNKDKIKNNLGIENGIPIFIAGVGRFHEAK<br>DYPNLINAFRIFKTKIIHNSQDNNLPILLIVGDGELKSEVELLIESFNLDKNIKLGRNRNDIPDLLNIA<br>DYFILSSKYEGLPTVIMEAMACETFVISTNCSGVEEIMNDTGIMVPICDSEALAEGLIKAYNLSPK<br>EIELNLSARRRIEKIFSLEKSIETWLEIYES                                                                                           | 4.342712  | 0.021518432 | up   |
| A0A6F8TC76 | Oxidoreductase                                | 60 | 7  | 21 | 2  | 17.5 | MLNTALPVLYKDGTIADNTYQIIAEDGVIPRGDVVLTTAQLDQLANIQGGKALYVTVNDSPEDH<br>TFPLSELDAIFIEFAGFDGGRGYSFAALLRRQGFQGELRATGDVFKDVLNLYLKRSGDFSVIKEGK<br>DVQEAAGLQDFTHPYQASTAVPKASYQTGA                                                                                                                                                                                                                                                                                                                      | 4.547818  | 0.029208884 | up   |
| A0A6H3SGL6 | RNA-binding protein Hfq                       | 39 | 6  | 64 | 1  | 19.0 | MSKGGTLQDPFLNSLRKERIPVSIFLVNGIKLQGHIESFDQYVLLKNTVSQMVMYKHAISTVVPA<br>RNP RPAGAQQAGFPAQGGSGGGGAGFGNTTFNLQTIYDVFSHDLASSTNLEGILNIADE<br>YVLETEEGLLPLISSHSINLKNHVSLEFSPKALTSLLSGRSLVNPkaa                                                                                                                                                                                                                                                                                                         | 8.1162791 | 0.048396398 | up   |
| A0A6H3SV37 | Glutathione peroxidase                        | 83 | 12 | 98 | 1  | 20.2 | MTQSVYHIPVKAISGETVDLDQYKGVLLIVNTASKCGLTPQYEGLEKLYQAKKDQGLEILGFP<br>ANNFKEQEPGSDEEIQFCSLNYDVHFLPFSKISVAGEDKHPLYQVLTTAQPERIGEGPFRERLEG<br>LGIPTNPAPEVLWNFEKFLINKNGEVVARFAPNLADDEQIVKAVEAELAK                                                                                                                                                                                                                                                                                                    | 4.6800884 | 0.000595684 | up   |
| A0A6H3T3L2 | Tetrahydrofolate dehydrogenase/cyclohydrolase | 73 | 14 | 69 | 2  | 29.7 | MALVLDGRALAKQIEENLLVRVEALKAKTGRTPILATILVGDDGASATYVRMKGNAACRRVGM<br>SLKIELLQETTTEQLLAEIEKLNANPDVHGILLQHPVPAQIDERACFDAISLAKDVGVTCLGFR<br>MAMGEAAYSATPAGIMTILKENNIEIAGKHAVVVGSRSAI LGKPMAMMLLQANATVTICHSR<br>QNLPELVKQADIIVAVGKAELIQKDWIKQGA VVVADAGFHPDRGGVVDIQLQGIEEIASAYTP<br>VPGGVGPMITTLLIRQTVEAAEKALG                                                                                                                                                                                      | 2.1575    | 0.000316412 | up   |
| A0A6H3UE57 | Winged helix DNA-binding domain superfamily   | 16 | 4  | 8  | 4  | 36.1 | MKKDLVVKDNALINASYNLDLAEQRLILLAILEARESNTSPDRDLTIHAESYINHFVHRNTAYK<br>VLKDACKNLFERRFSYQKLTAKGNLENVMSRWVQRVSYVENEALVRIRFSDDVAPLITNLEKHF<br>TSYELEQVSSLTSAYAIRLYELLIAWRSTGKVSMLTEKELSRGLVSDTEHQRMESFKRRVLEPAI<br>QQINDHTDIKAIEYEQHKRGRSIVGFSFSFKQKSKPKTINHERDPSTVDMFCNLSDSQINTYSSILSK<br>VHSISDLAGNKDYQAFAIWIANILRDPTSREETA KRIFKALRTETDFKG                                                                                                                                                       | 4.7371684 | 0.004133757 | up   |
| A0A6I4HT95 | Uncharacterized protein                       | 46 | 5  | 9  | 5  | 16.5 | MKNYILIFIGALIAACSDKGTDKNQHNSNHKLDVVQTE TNKSQSVVGENQENTDKMVKTKEAD<br>QVAQFSCSNPNITQWYGFNENIAEPKCEVVKNFQLTAYKCDISKNAFGASKDAILLENQDKRIFV<br>YSTSKDCNEMLEVRNANAP                                                                                                                                                                                                                                                                                                                                  | 0.3126067 | 0.026249203 | down |
| A0A7S8F867 | phosphomannomutase                            | 46 | 19 | 57 | 2  | 51.0 | MTTLTCFKAYDIRGKLGTELNEEIAKIGRAYGQIYKPKTVVVGCDIRLSSEALKQATIRGLNDA<br>GVNVLDLGMTGTEEVYFAAFHLDVQGGIEVTASHNPMDYNGMKLVRENARPISADTGLKEIQ<br>LAETNNFEEVSQKGTQSYNLPFVVDHLLTYIEPTKIRPLKLVVNAGNAGAAGHVIDAIEEKFAL<br>NVPVEFIKIHHEADGTFPNGIPNPIENRDSTRNAVLEHKADMGIAWDGFDRCLFDFDEKGGQFIE<br>GYYIVGLLAQAFLIKQSSEKIVHDPRLVWNTFDIVDEYKGVAVQSKSGHAFIKDVMREHNAVY<br>GGEMSAHHYFRDFAYCDSGMIPWLLTVALLSETGQSLSTLVENMITKFPSCGEINFKVADTQITI<br>QKIFDFYAAQNPEIDRTDGVSLDFGAWRFNVRASNTPEPLRLNIESRADRQAQPMQYVDELTS<br>RGS | 7.6025923 | 0.000544816 | up   |
| A0A7S8ZW19 | Replication initiation protein                | 15 | 3  | 5  | 3  | 36.3 | MKKELVVKDNALINASYNLDLSEQRLLILLAILEARQSNTPNDKDLTIHAESYINHFVHRNTAYK<br>VLKDACKSLFDRRFYSYQKLTQKGNIEVISRWVQRISYVENEALVRIKFSDDVAPLITNLEKHFTS<br>YELEQVSSLTSVYAIRLYELLIAWRSTGKVTMVELEELRLKLGIEPNEYKRMGQFKEKVLHLAID<br>QINKYTDIKAIEYEQHKRGRSIIIGFSFKFKQKQPKKLDKSRDPNTPDFIRMTDAQRHLFGNKLA<br>HDARVQSEYSHLIGTGSYEDFAKLLADMLAEQHFHFMFYPLLVHEHGYKA                                                                                                                                                       | 2.866637  | 0.001459985 | up   |

|            |                                                              |    |    |     |   |       |                                                                                                                                                                                                                                                                                                                                                                                                                                                                                                                                                                                                                                                                                                                                                                                                                                                                                                                                                                                                                                                                                                                                                                          |           |             |      |
|------------|--------------------------------------------------------------|----|----|-----|---|-------|--------------------------------------------------------------------------------------------------------------------------------------------------------------------------------------------------------------------------------------------------------------------------------------------------------------------------------------------------------------------------------------------------------------------------------------------------------------------------------------------------------------------------------------------------------------------------------------------------------------------------------------------------------------------------------------------------------------------------------------------------------------------------------------------------------------------------------------------------------------------------------------------------------------------------------------------------------------------------------------------------------------------------------------------------------------------------------------------------------------------------------------------------------------------------|-----------|-------------|------|
| A0A7U3Y2S3 | Uncharacterized protein                                      | 60 | 6  | 21  | 1 | 17.4  | MLNTALPVLKDGTIADNTYQIIAEDGVIPQGDVLTAAQLDQLANTQGKKALYVTVNDSPEDHTFPLSELDAIFIEFAGFGDGRGYSFAALLRRQFGQFQGELRATGDVFKDVLNLYLKRSGFDSFVKEGKDVQEAAAAGLQDFTHPYQASTAVPKASYQTGA                                                                                                                                                                                                                                                                                                                                                                                                                                                                                                                                                                                                                                                                                                                                                                                                                                                                                                                                                                                                       | 0.2595185 | 0.012055299 | down |
| A0A7U4BQ44 | Uncharacterized protein                                      | 71 | 4  | 23  | 3 | 8.7   | MNSKFSVDQSNKISLKAILEDLGDQMFEANKCPDTHPVYDQLRERLRKDRQLLDALDAQDENA NTEERSRLDIN                                                                                                                                                                                                                                                                                                                                                                                                                                                                                                                                                                                                                                                                                                                                                                                                                                                                                                                                                                                                                                                                                              | 2.1256345 | 1.52E-05    | up   |
| A0A7X5C6N3 | Uncharacterized protein                                      | 57 | 3  | 9   | 1 | 7.4   | MDNSKLPINQIARINDAAKHGEALVLTAEVVKILSKDIGDKVFPVLTNEQVVQLVKEGKLGQKI K                                                                                                                                                                                                                                                                                                                                                                                                                                                                                                                                                                                                                                                                                                                                                                                                                                                                                                                                                                                                                                                                                                       | 2.5141939 | 0.022932107 | up   |
| A0A7Z1WNT5 | Metallo-beta-lactamase superfamily lactonases                | 49 | 12 | 52  | 1 | 35.4  | MKKLFFVALGLIMGSLHISYAEPASAAQVPGYYHHQFGNYRITSLLDGTIYLDPKLFKNLSPA EKT KILT KYAAVNEKGIQTSVNAFLVDDGKSLTLVDSGAASC FGPQLGSI AKNLELAGYQLANVKTV LLTHLHPDHVCGIAQNGKAVFPNATIY AHEREADY WLN PAN EKTVPEDKKENY LGTVKNVKA ALAPYQAKKAFKTFKDG DVIQGF E VINTQGH TPGHHSFRLKSKGQQIVFVGDIVHSHSLQFDAPK TGVD FDNSEQA INTRLKMF AEISNKQQWVAAPHLFPFGIGHVYK VSAEQYQWIPLYFNNSLDK                                                                                                                                                                                                                                                                                                                                                                                                                                                                                                                                                                                                                                                                                                                                                                                                                    | 2.6041452 | 0.042582489 | up   |
| A0A829K710 | Aspartyl/glutamyl-tRNA(Asn/Gln) amidotransferase subunit B   | 81 | 29 | 148 | 1 | 53.7  | MAEAQKLLKIDGWEVVIGIEIHTQLATNSKIFSGSSTFEFGDPNTQASLVDLAMPGVLPVLNEKV VELAIRFGLGIDAYIDQASVFARKNYFYPDSPKGYQISQMDNPIVGLGHIDIQLEDGTTKRIGVTR AHLEEDAGKSVHDQFEGMSGIDLNRAGTPLLEIVSEPD MRSVEEAVAYIKAIHTLVRWLGISDGN MAEGSFRADCNVSLRRPGQPFGRCELKNLSFRFIEQAINVEIERQMEILEWGG EIDQETRLFDPNKMETRSMRSKEEANDYRYFPDPDLLVPIIPDEQIEAIKATMPELPAARRARFIADFGVTEYDAH VLTLSREMADFYEA VVAAGGAKQGKIAANWVMGEFSGALNKAGLELTDSPVSAEQLGGMIA RIIDNTISGKIAKQVFGFMWESEGKSADDIIAEKGLKQETD TGAIEAIIKEVLAANEK MVEEYKSG KEKAFNGLVGQVMKASKGKANPAQVNELMKKLG                                                                                                                                                                                                                                                                                                                                                                                                                                                                                                                                                                                                                                                         | 0.4560349 | 0.000884237 | down |
| A0A829RFQ7 | Alanine racemase                                             | 30 | 9  | 33  | 2 | 40.5  | MPRPITAVIHRQALQNNLAVVRKAMPNSKVFAVVKANAYGHGIERVYEA FKAADGFALLDLDE AKRIRALGWTGPILLLEGIFSPQDLFDCVQYQLSFTIHSEAQIEWVEQHYPYPAQFDVFLKMNSGM NRLGFKPQHVVQAWERLNLNLANVAKITHMMHFSADGDRFGQQGIDYQITAFEEVVKDLPGER SVSNSAAILRYQDQLKSDYVRS GIMLYGSSPDYPTHSIADWGLQPTMSLRSEHSVQHLEPNESVGYGSNFVAEQPMTIGIVACGYADGYQRISPTGTPVLVDSVRTRTVGRVSM DMLAVDLTGIESAKV GSEVVLWGQSSTGVVLPIDDVAVSSGT VGYELMCAV TARVQFINQV                                                                                                                                                                                                                                                                                                                                                                                                                                                                                                                                                                                                                                                                                                                                                                                 | 5.6266962 | 0.020238648 | up   |
| A0A837Q8N8 | Type VI secretion system, RhsGE-associated Vgr family subset | 2  | 2  | 4   | 1 | 122.6 | MQMSVSSILERLGLVSQNR AVHIQFSNQSLNQQVFLQRIEGEHTLNQGSVAELLCLSTNAHIALK QFIGCQVAVDQVTD TGQFFRTTGIITEASQGGSDGSLTIYNLTLKDPTALWHKRRNSRVFMNKS VRDISEILFKEWQEKSP LFASSITLDT SGLTKDYDVRPFVMQSNESDYDFLTRLRWRSEGINWLVD ESQ LFIADPNASIQPQVLR LIDDNQNYQALERRSIRYQRSSATEQFDITITQVKAERRLQPTSVHVQ RWQADALQQEEGSGSVQGTQKHSEHYDNASLNLEDAWHVSPA WMQDLNGEDQATASGNSQI EQLNQHINAYHHLSSKQFTVAGNVRDAQVGYWFELNDHPELDQHDSADKEFLILSKHYNQNN LPKELQQQLERLLPQGKLLAAQLDSQNPEQRHFAELNVVRRNIKAVPEYNPLEHRPAAHPQRAR VVGLEGESIHVDQWGRIKVRFLFTRADHSHDGGAGSNDNDTSAWVDVLTWPAGAGYGARF LPRVGEIVVIDFFDGNIDRPFVVGRIHEAERHPTQFDQKGGQLPDTK KLSGRSEEVDGKGFNQLRF DDTTGGQISAQLQSSHAASQLNLGNLSHPKDKAESDGRGEGFELRTDQWG AIRAGSGLLVSTHKQ DQAQGVHLDA SEAKQQIEGGLNNAKALSEVAKNQQT DPLDML ENIQTFLEVLKQEDPKKAAEF QSAVMLLASPKSIAVSSNEDIHLSANGQLTQSAGDSINISTQKNIVSHASQKISLFAAQEGARLFA GQKVEIQAQGDGLDVIARKGVQITSIEDTVYITSPTEINLTANGS QVKLNGSGIFPVTGGKLEVK AGQHLMGGGKVDVKVPK LKELNITKKYSNKLDVYEIFPTNKFTDLTMSVKGSDGVVEEHKID KYGRSPRISDAEPKELEVLVGGDVWNYFIKNIGGTKDDPFYFKFLDYVGKPIVGM ECYLLDNSL NIVKKEVTDGNGEVEFVYTD EYLPIMGVMKFDDNTVKPICYVNHHCREYIFISPKVKANLALL EEGQKGEYLRAGYRVKEGESLQNIADKYSITTD EHS LNTGMENIDVNTKLVEGAYIKLPNYINRE EWKNG | 0.4041687 | 0.009226782 | down |
| A0A8I0F482 | D-amino acid dehydrogenase                                   | 72 | 21 | 150 | 1 | 47.2  | MREGMEMRVIVLGSVIGVASAYYLARQGA E VTVLDRQSGPAEETSFGNAGQISPGYSTPWAA PGIPFKA VKWMFQHHAPLAINLDGSMWQLQWMAQMLKNCNPQSYAVNKERM MRVAEYSRD CLRELKDTGIHYENRAKGT LQFRKEAQMEAVQRDISVLEECGVS YELLNANELGRV EPALAN AQDKLVGGHLHPNDETGD CYLFTNALAQIAKELGVN FQFNQNV EKLIVEGDQIKGVQVNGKVL TADRYVLAFGSYSRDFL KPLDLQLPVYPVKGYSLTIPIVDPAFAPQSTVLD ETYKIAITRFDQRIRV GGMAELSGFN LGLNEDRRATLQMV TQDLFPGGDMEQASFWTGLRPMTPDSTPIIGATRFKNLFL NTGHGT LGWTMACGSGKLISDIVLNHKTDISTDGLSIQRYSHAHAA                                                                                                                                                                                                                                                                                                                                                                                                                                                                                                                                                                                                                                                                                                            | 0.2780168 | 0.017199038 | down |
| A0A9P2P5S8 | MmcQ/YjbR family DNA-binding protein                         | 29 | 3  | 3   | 1 | 14.4  | MNGVQLHLQAIEAARNLPFSEQTHPFGPEYEVFKILEKMFMLTVEVSGVKMINVKCDPYKSQEY QELYPFIIPGYHMNKKHWISIKPHKNLTSDFLRDLIRDSYDLVVKKLPLKDQKRLNMQ                                                                                                                                                                                                                                                                                                                                                                                                                                                                                                                                                                                                                                                                                                                                                                                                                                                                                                                                                                                                                                              | 3.7316764 | 0.00041903  | up   |

|            |                                                     |    |    |     |   |      |                                                                                                                                                                                                                                                                                                                                                                                                                                                                                                                                                                                                                                                                                                                                                                                                                                                                                                                                                                                                                                                                                                                                                                                                                                                    |           |             |      |
|------------|-----------------------------------------------------|----|----|-----|---|------|----------------------------------------------------------------------------------------------------------------------------------------------------------------------------------------------------------------------------------------------------------------------------------------------------------------------------------------------------------------------------------------------------------------------------------------------------------------------------------------------------------------------------------------------------------------------------------------------------------------------------------------------------------------------------------------------------------------------------------------------------------------------------------------------------------------------------------------------------------------------------------------------------------------------------------------------------------------------------------------------------------------------------------------------------------------------------------------------------------------------------------------------------------------------------------------------------------------------------------------------------|-----------|-------------|------|
| A0A9P2QG90 | Aspartate/other aminotransferase                    | 68 | 17 | 115 | 1 | 44.9 | MFQHIPPYAGDPILSLMEQFNADTRSEKVNLSIGLYYNEDSIVPQLETIEEAQKRIEPKNGKTKLYL<br>PMEGFKPYREAIQALLFGANSPAVKAGRAVTIQTLLGGSGALKVGDADFLKTYFPSSDVVWSQPTW<br>DNHVAIFNGAGIKTHFYYPYFDAETRGVDFDGMSTLKTLPESIVLLHPCCHNPTGADLNPAQW<br>DQVI AVLKDRNLPIPLFDIAYQGFGDMEEDAYAIRALDQAGLNFI VNSNSFKISLYGERVGGTLF<br>VCDDAEAAQCTFGQLKATVRRYISSPPTTGAWLVDEVLNDAELNQQWQGEVKEMRERIIKMRS<br>ILKDELTKALPDRDFS YLVNQG MFSYTGLTAEQVDILREYAIYLVRSGRICVAGLNMNNVYT<br>VAKAMAEVLAKSVEAA                                                                                                                                                                                                                                                                                                                                                                                                                                                                                                                                                                                                                                                                                                                                                                                                     | 3.7415104 | 0.00511352  | up   |
| A0A9P2UCI4 | Uncharacterized protein                             | 32 | 4  | 7   | 3 | 17.9 | MPQYLFLAETIYKMKNEKLSKDVLENMYILMKVIRKEIKGTEYKLYNFIDFNEVLSKSKND<br>CKVKIDVSLIPSYNLREEYILWLAGFIQKITEGGPKPPPIKEYIPEFINLESELDLFTLNLEKNQNN<br>GEEIVNYFNSKHYKATFKK<br>MNEIYPVPEEFKKTARTVEADYFKRYQHSIENPDEFWAEQAKIVDWIKPFTQVKNTSFDKDNFKI<br>EWFADGELNVSANCLDRHLKEHPHKPAIIWEGDHP SRHKIVSYKELHDEVCRFANVLKKGIGK<br>GDRVVLYMPMVTEAAIAMLACARIGAVHCVVFGGFPDLSASRIEDSQA KL VITADSSLRAGLK<br>LPLKENVDLALALPGTECVENVIVYRNANPIEMKPGRDLYWHLIIMEVDANCPPEPMKAEDPL<br>FILYTSGSTGKPKGV LH TTGGYL VYVASTFKEVFDLQDDVYWCTADV GWITGHSYLIYGPLA<br>NGTTTLMFEGVPQYPTWARLGHVVDKHKVSIYLTAPT AIRAMMREGDSYVRESNRSSLRLGSG<br>VGEPI NPEAWNWYNNVVGEGRCPIVDTWWTETGGILIAPLPGAT ALKPGSATRPLFGIQAIVD<br>GEGNELEGA AEGNLVIKDSWPGQMRTIWGDPDRFIEAYFSTFKNTYFTGDGARRDEDGYYWIT<br>GRVDDVLNVSGHRLGTAEIESALVSHEAVAEAAVVGMPHDIKGGQICTFVTLQAGVPESEELRK<br>ELISWVRKVLGPV ASPDALHWAPALPKTRSGKIMRRILRKIAANELDSLGDSTLAEPAVVDQLI<br>TTVYPDRQK                                                                                                                                                                                                                                                                                                                                                              | 2.1691094 | 0.000570068 | up   |
| A0A9P2UE60 | Acetate-CoA ligase                                  | 41 | 17 | 31  | 1 | 72.2 | MNSDIQKINTNEVMSAVTVFNKV VYLSGQVPKNTEQDVAGQ TREILATIEELLALANTDKSRL<br>LSAQLYLK NLSDFSTVNAI WVDWLKGCVAPSRATIQA DLVNPDWLIEIAV TAAQK<br>MSSESQSASQTEQTNEKAYDSSSIK VLRGLDAVRKRPGMYIGD TDDGTGLHHMVFEVDNAIDE<br>ALAGHCDEIIVTIHEDESVSVDNGRGIPTDIHP EEGVSAAEVIL TILHAGGKFD DNSYKVSQGLH<br>GVGVSVVNALSSKLHLTIYRAGQIHEQEYHHGDPQYPLRVIGETDNTGTTVRFWPSAETFSTIF<br>NVEILARRLRELSFLNAGVRIVLRDERINLEHVYDYEGGLSEFVKYINEGKNHLNEIFHTADADN<br>GIAVEVALQWNDSYQENVRCFTNNIPQKDGTHLAGFRAALTRGLNQYLENENILKKEKVNVT<br>GDDAREGLTAIISVKVPDPKFSSQTKELV SSEVKPAVEQAMNKEFSAYLLENPQA AKSIAGKIID<br>AARARDAARKAREMTRRKSALDIAGLPGKLADQC EKDPALSELYLVEGDSAGGSAKQGRNRK<br>MQAILPLK GKILNVERARFDKMISSQDVGTLIT ALGCGIGREEYNPDKLR YHKIIIMTDADVDGS<br>HIRTLLL TFFFRQMP ELVERGHIYIAQPPLYK LKKGKQEYIKDNDAL ETYLISNAIDELALHISAD<br>APAITGEALAKVIQDYQVSQKSLQRLTLRYPASLLDALLEVD AFKADQNH DQAYVQQWADQVR<br>EAVQRLQPSLRPEITLET FERENAQGEKSAHYWPRVTVYVHNLPHAYLLDAGLLNSAEYARLLK<br>NSKSWFKLIEDGAYLQK GDRRIQVANFHQVWQHILQDSRRGMMIQR YKGLGEMNAEQ LWETT<br>MDPENRNLQVTTIDDAIEADRMFSCLMGDDVEPRRAFIEENALNADIDA                                                                                                                                                                                           | 4.5325444 | 0.019459766 | up   |
| A0A9P2UFA0 | RutC-like superfamily                               | 86 | 7  | 50  | 2 | 13.1 | MNSDIQKINTNEVMSAVTVFNKV VYLSGQVPKNTEQDVAGQ TREILATIEELLALANTDKSRL<br>LSAQLYLK NLSDFSTVNAI WVDWLKGCVAPSRATIQA DLVNPDWLIEIAV TAAQK<br>MSSESQSASQTEQTNEKAYDSSSIK VLRGLDAVRKRPGMYIGD TDDGTGLHHMVFEVDNAIDE<br>ALAGHCDEIIVTIHEDESVSVDNGRGIPTDIHP EEGVSAAEVIL TILHAGGKFD DNSYKVSQGLH<br>GVGVSVVNALSSKLHLTIYRAGQIHEQEYHHGDPQYPLRVIGETDNTGTTVRFWPSAETFSTIF<br>NVEILARRLRELSFLNAGVRIVLRDERINLEHVYDYEGGLSEFVKYINEGKNHLNEIFHTADADN<br>GIAVEVALQWNDSYQENVRCFTNNIPQKDGTHLAGFRAALTRGLNQYLENENILKKEKVNVT<br>GDDAREGLTAIISVKVPDPKFSSQTKELV SSEVKPAVEQAMNKEFSAYLLENPQA AKSIAGKIID<br>AARARDAARKAREMTRRKSALDIAGLPGKLADQC EKDPALSELYLVEGDSAGGSAKQGRNRK<br>MQAILPLK GKILNVERARFDKMISSQDVGTLIT ALGCGIGREEYNPDKLR YHKIIIMTDADVDGS<br>HIRTLLL TFFFRQMP ELVERGHIYIAQPPLYK LKKGKQEYIKDNDAL ETYLISNAIDELALHISAD<br>APAITGEALAKVIQDYQVSQKSLQRLTLRYPASLLDALLEVD AFKADQNH DQAYVQQWADQVR<br>EAVQRLQPSLRPEITLET FERENAQGEKSAHYWPRVTVYVHNLPHAYLLDAGLLNSAEYARLLK<br>NSKSWFKLIEDGAYLQK GDRRIQVANFHQVWQHILQDSRRGMMIQR YKGLGEMNAEQ LWETT<br>MDPENRNLQVTTIDDAIEADRMFSCLMGDDVEPRRAFIEENALNADIDA                                                                                                                                                                                           | 0.4951441 | 0.004996274 | down |
| A0A9P2XJK2 | DNA gyrase subunit B                                | 61 | 40 | 149 | 3 | 92.1 | MNFQTLSSFKNQSTGTD AFKNLKSACEHHLKHSSDLNEKAVIYLIYGFARSYVILYEGEAVTTEF<br>AQASKEMLVNYMNRLEALR TQDNHII LNTLNQVSN DYMQGSRIF<br>MSLDKPTLIIRQWNDLQDYQSKFESMKNLTNQRDENTADELWLLQHHEVLTQGGQAGKPEHILIP<br>SNIPVVQTD RGGQV TWHGPGQLVAYFMFDLNR LKWNVRTLV SFAEQFMIDVLKKNIEAYAKP<br>DAPGVYVDGRKIGSLGFKIRRGRSYHGLALNLDCA LTGFQ TINPCGYAGLEMVRIQDLVTPYPLF<br>EQLCQDFIEYIKGTGYFNDPEVKIE<br>MNTKYRKPLAGTQLEYYDVRQAVEDIQPGAYEKL PYTSKVLAEQLVRRADAENLTA YLTQLIE<br>RRQDLDFPWYPARVVC HDILGQTALVDLAGLRDAIAEKGGDP SKVNPVPTQLIVDHS LAVEYG<br>GADPDAFAKNRAVEDRRNEDRFHFIEWTKTAFKNVDVIPAGNGIMHQINLEKMSPV IQARDGV<br>AFPDT CVGTDSHTPHTDALGVISVGVGGLEAENVMLGRASWMRLPDIIGVELV GQRQAGITADT<br>IVLALTEFLRKERVVGAYLEFFGEGADSMSVGD RATISNMTPEYGATAAMFYIDQNTIDYLRLT<br>GREDAQVALVEQYAKEIGLWASEMTKAEYPRVLRFDLSTVTRNIAGPSNPHARVSTSDLKEKGI<br>AGVVENRSDGLMPDGAIIIAITSCNTNSPRNTVAAGLLARKANELGLVRKPWVKSSFAPGSKA<br>AALYLEEAGVLKDLEKLGFGIVAYACTTCNGMSGALDPAIQQEIIDRDLYATAVLSGNNRNF DGRI<br>HPYAKQAFLASPLLVAYAIAGTIRFDIEKDALGYDKEGNPIYLKDIWPSDAEIDALVKQAVKPE<br>QFRKVYIPMFDLGEVEQAKSPLYDWRPQSTYIRRPY WEGALAAPRTL ANMRPLAILGDNITTD<br>HLSPSNAILMDSAAGEYLHKMGVPEEDFNSYATHRGDHLTAQRATFANPKLYNEMVRRSDGTI<br>KQGSKARVEPEGEVMRMWEAIETYMNRKQPLIIIAGADYQGSSRDWAAGVRLAGVEAIVAE<br>GFERIHRTNLVGMGVLPLEFK | 2.0927906 | 0.014651926 | up   |
| A0A9Q1N8I6 | Uncharacterized protein                             | 66 | 5  | 10  | 5 | 12.7 | MNFQTLSSFKNQSTGTD AFKNLKSACEHHLKHSSDLNEKAVIYLIYGFARSYVILYEGEAVTTEF<br>AQASKEMLVNYMNRLEALR TQDNHII LNTLNQVSN DYMQGSRIF<br>MSLDKPTLIIRQWNDLQDYQSKFESMKNLTNQRDENTADELWLLQHHEVLTQGGQAGKPEHILIP<br>SNIPVVQTD RGGQV TWHGPGQLVAYFMFDLNR LKWNVRTLV SFAEQFMIDVLKKNIEAYAKP<br>DAPGVYVDGRKIGSLGFKIRRGRSYHGLALNLDCA LTGFQ TINPCGYAGLEMVRIQDLVTPYPLF<br>EQLCQDFIEYIKGTGYFNDPEVKIE<br>MNTKYRKPLAGTQLEYYDVRQAVEDIQPGAYEKL PYTSKVLAEQLVRRADAENLTA YLTQLIE<br>RRQDLDFPWYPARVVC HDILGQTALVDLAGLRDAIAEKGGDP SKVNPVPTQLIVDHS LAVEYG<br>GADPDAFAKNRAVEDRRNEDRFHFIEWTKTAFKNVDVIPAGNGIMHQINLEKMSPV IQARDGV<br>AFPDT CVGTDSHTPHTDALGVISVGVGGLEAENVMLGRASWMRLPDIIGVELV GQRQAGITADT<br>IVLALTEFLRKERVVGAYLEFFGEGADSMSVGD RATISNMTPEYGATAAMFYIDQNTIDYLRLT<br>GREDAQVALVEQYAKEIGLWASEMTKAEYPRVLRFDLSTVTRNIAGPSNPHARVSTSDLKEKGI<br>AGVVENRSDGLMPDGAIIIAITSCNTNSPRNTVAAGLLARKANELGLVRKPWVKSSFAPGSKA<br>AALYLEEAGVLKDLEKLGFGIVAYACTTCNGMSGALDPAIQQEIIDRDLYATAVLSGNNRNF DGRI<br>HPYAKQAFLASPLLVAYAIAGTIRFDIEKDALGYDKEGNPIYLKDIWPSDAEIDALVKQAVKPE<br>QFRKVYIPMFDLGEVEQAKSPLYDWRPQSTYIRRPY WEGALAAPRTL ANMRPLAILGDNITTD<br>HLSPSNAILMDSAAGEYLHKMGVPEEDFNSYATHRGDHLTAQRATFANPKLYNEMVRRSDGTI<br>KQGSKARVEPEGEVMRMWEAIETYMNRKQPLIIIAGADYQGSSRDWAAGVRLAGVEAIVAE<br>GFERIHRTNLVGMGVLPLEFK | 2.2548089 | 0.005192214 | up   |
| A0A9Q1RYZ7 | Octanoyltransferase                                 | 29 | 5  | 8   | 1 | 24.9 | MNFQTLSSFKNQSTGTD AFKNLKSACEHHLKHSSDLNEKAVIYLIYGFARSYVILYEGEAVTTEF<br>AQASKEMLVNYMNRLEALR TQDNHII LNTLNQVSN DYMQGSRIF<br>MSLDKPTLIIRQWNDLQDYQSKFESMKNLTNQRDENTADELWLLQHHEVLTQGGQAGKPEHILIP<br>SNIPVVQTD RGGQV TWHGPGQLVAYFMFDLNR LKWNVRTLV SFAEQFMIDVLKKNIEAYAKP<br>DAPGVYVDGRKIGSLGFKIRRGRSYHGLALNLDCA LTGFQ TINPCGYAGLEMVRIQDLVTPYPLF<br>EQLCQDFIEYIKGTGYFNDPEVKIE<br>MNTKYRKPLAGTQLEYYDVRQAVEDIQPGAYEKL PYTSKVLAEQLVRRADAENLTA YLTQLIE<br>RRQDLDFPWYPARVVC HDILGQTALVDLAGLRDAIAEKGGDP SKVNPVPTQLIVDHS LAVEYG<br>GADPDAFAKNRAVEDRRNEDRFHFIEWTKTAFKNVDVIPAGNGIMHQINLEKMSPV IQARDGV<br>AFPDT CVGTDSHTPHTDALGVISVGVGGLEAENVMLGRASWMRLPDIIGVELV GQRQAGITADT<br>IVLALTEFLRKERVVGAYLEFFGEGADSMSVGD RATISNMTPEYGATAAMFYIDQNTIDYLRLT<br>GREDAQVALVEQYAKEIGLWASEMTKAEYPRVLRFDLSTVTRNIAGPSNPHARVSTSDLKEKGI<br>AGVVENRSDGLMPDGAIIIAITSCNTNSPRNTVAAGLLARKANELGLVRKPWVKSSFAPGSKA<br>AALYLEEAGVLKDLEKLGFGIVAYACTTCNGMSGALDPAIQQEIIDRDLYATAVLSGNNRNF DGRI<br>HPYAKQAFLASPLLVAYAIAGTIRFDIEKDALGYDKEGNPIYLKDIWPSDAEIDALVKQAVKPE<br>QFRKVYIPMFDLGEVEQAKSPLYDWRPQSTYIRRPY WEGALAAPRTL ANMRPLAILGDNITTD<br>HLSPSNAILMDSAAGEYLHKMGVPEEDFNSYATHRGDHLTAQRATFANPKLYNEMVRRSDGTI<br>KQGSKARVEPEGEVMRMWEAIETYMNRKQPLIIIAGADYQGSSRDWAAGVRLAGVEAIVAE<br>GFERIHRTNLVGMGVLPLEFK | 0.4660374 | 6.33E-05    | down |
| A0A9Q1RZT3 | 2-methylisocitrate dehydratase AcnD, Fe/S-dependent | 59 | 35 | 98  | 5 | 86.6 | MNFQTLSSFKNQSTGTD AFKNLKSACEHHLKHSSDLNEKAVIYLIYGFARSYVILYEGEAVTTEF<br>AQASKEMLVNYMNRLEALR TQDNHII LNTLNQVSN DYMQGSRIF<br>MSLDKPTLIIRQWNDLQDYQSKFESMKNLTNQRDENTADELWLLQHHEVLTQGGQAGKPEHILIP<br>SNIPVVQTD RGGQV TWHGPGQLVAYFMFDLNR LKWNVRTLV SFAEQFMIDVLKKNIEAYAKP<br>DAPGVYVDGRKIGSLGFKIRRGRSYHGLALNLDCA LTGFQ TINPCGYAGLEMVRIQDLVTPYPLF<br>EQLCQDFIEYIKGTGYFNDPEVKIE<br>MNTKYRKPLAGTQLEYYDVRQAVEDIQPGAYEKL PYTSKVLAEQLVRRADAENLTA YLTQLIE<br>RRQDLDFPWYPARVVC HDILGQTALVDLAGLRDAIAEKGGDP SKVNPVPTQLIVDHS LAVEYG<br>GADPDAFAKNRAVEDRRNEDRFHFIEWTKTAFKNVDVIPAGNGIMHQINLEKMSPV IQARDGV<br>AFPDT CVGTDSHTPHTDALGVISVGVGGLEAENVMLGRASWMRLPDIIGVELV GQRQAGITADT<br>IVLALTEFLRKERVVGAYLEFFGEGADSMSVGD RATISNMTPEYGATAAMFYIDQNTIDYLRLT<br>GREDAQVALVEQYAKEIGLWASEMTKAEYPRVLRFDLSTVTRNIAGPSNPHARVSTSDLKEKGI<br>AGVVENRSDGLMPDGAIIIAITSCNTNSPRNTVAAGLLARKANELGLVRKPWVKSSFAPGSKA<br>AALYLEEAGVLKDLEKLGFGIVAYACTTCNGMSGALDPAIQQEIIDRDLYATAVLSGNNRNF DGRI<br>HPYAKQAFLASPLLVAYAIAGTIRFDIEKDALGYDKEGNPIYLKDIWPSDAEIDALVKQAVKPE<br>QFRKVYIPMFDLGEVEQAKSPLYDWRPQSTYIRRPY WEGALAAPRTL ANMRPLAILGDNITTD<br>HLSPSNAILMDSAAGEYLHKMGVPEEDFNSYATHRGDHLTAQRATFANPKLYNEMVRRSDGTI<br>KQGSKARVEPEGEVMRMWEAIETYMNRKQPLIIIAGADYQGSSRDWAAGVRLAGVEAIVAE<br>GFERIHRTNLVGMGVLPLEFK | 2.5504691 | 0.046897123 | up   |

|            |                                                                             |    |    |     |   |      |                                                                                                                                                                                                                                                                                                                                                                                                                                                                                                                                                                                                                                                                                                                                                                                                                                                                                                                                                                                                                                                                                                                                                                                                                                                                                                                                                                                                           |           |             |      |
|------------|-----------------------------------------------------------------------------|----|----|-----|---|------|-----------------------------------------------------------------------------------------------------------------------------------------------------------------------------------------------------------------------------------------------------------------------------------------------------------------------------------------------------------------------------------------------------------------------------------------------------------------------------------------------------------------------------------------------------------------------------------------------------------------------------------------------------------------------------------------------------------------------------------------------------------------------------------------------------------------------------------------------------------------------------------------------------------------------------------------------------------------------------------------------------------------------------------------------------------------------------------------------------------------------------------------------------------------------------------------------------------------------------------------------------------------------------------------------------------------------------------------------------------------------------------------------------------|-----------|-------------|------|
| A0A9Q1S3Z9 | Isocitrate dehydrogenase<br>NADP-dependent, dimeric,<br>prokaryotic         | 69 | 23 | 150 | 1 | 45.6 | MGYQKIVVPADGDKITVKADLSLNVQNHPIIPFIEGDGIGVDITPAMKKVVDAAAILKAYGGKRSI<br>EWMEVYCGEKANKIYGTYPPEETFEALREFVVSIGKPLTPPVGGGIRSLNVALRQELDLVYCVR<br>PVRWFQGVPSVPVQHPQLTDMVIFRENSEDIYAGIEWKADSEEAKKVIKFLQEEMGVTKIRFPEGC<br>GIGIKPVSKEGTQRLVRKAIQFAIDNDKPSVTLVHKGNIMKYTEGAFKEWGYELALDRFGGELID<br>GGPWVKIKNPKNGKDIHKDVIADAFLLQQLMRPADYSVIATLNLNGDYISDALAAEVGGIGIAPG<br>ANIGGAIAYVEATHGTAPKYAGQDKVNPGSILSAEMMLRDMGWTEAADLIKGISGAIAAKT<br>TYDFERLMPGATLLRCSEFGDAIIQHMED                                                                                                                                                                                                                                                                                                                                                                                                                                                                                                                                                                                                                                                                                                                                                                                                                                                                                                                                                  | 4.9176527 | 0.026406369 | up   |
| A0A9Q1ZY45 | Methylated DNA-protein<br>cysteine methyltransferase,<br>DNA binding domain | 27 | 3  | 4   | 3 | 12.9 | MSTFMSILTTQYELHRQILEVALIPYGVVATYGGVARMAGLPKHARLVGVYVLLKHLADHQVP<br>WYRVINSQGKISLSKFNEKGENIQQLKLEAEGIYLLNGKVNLEKEFAWQP                                                                                                                                                                                                                                                                                                                                                                                                                                                                                                                                                                                                                                                                                                                                                                                                                                                                                                                                                                                                                                                                                                                                                                                                                                                                                     | 0.4716612 | 0.043913993 | down |
| A0A9Q4SJB7 | Bacterial solute-binding protein<br>3                                       | 56 | 14 | 31  | 1 | 31.7 | MTTLTFQNVKHLAASLLSLGLVACDKGTQSTEKSAADTTQTTSSIEQIKKNGVVRIGVFSDDKPPFG<br>YLDAQGKNQGFVDEIAKHVAKDLLGDEIKVEFVLTEAANRVEYLKANKVDIIFANFTVTPERKE<br>VVDFAKPYLKV ALGVVSPKSHPTDVAQLKDKTLLVNGKTTADSFFTKTHPEIKLQKYEQNTET<br>FDALKDGRGVALAHNLLVLA WAKENPNYTVGITNLGEQDLIAPAVKKGDKELLDWLNQDLE<br>KLAKEGVIIHQAYEKTLPVYGDITNPKDLLVE<br>MFKKFLFQIHWFLGISAGLILSIMGVTGAIYSYDQQLKWVNTDSYVVQVQSSPKLTPAQLYQH<br>TTIQPEIKINSITIAKDPTASSVVNIEKEGERRGNMNVNPTAQLVPEVQGRKLLLLIQIHRNLT<br>AGEFGKQITGACALMLIYFVLSGLYLRWPKKHSARQWLAVKPKLGRNFIWDLHAVVGTWVIV<br>FYLLFACTGLYWSYDWWRSGMFKVLGVEQPKMQGHSGSRNKDQLPKIQLDNAQLITALNQT<br>WSGFNNQIGRDYSTLTVNLPKKDDGKIELSFVDATPQHERARNQAVYNYKTANIEKMELYEDK<br>KLNQKIMSSMLPVHRGSFFGPVYQFVAMLASLAMPLFFVTGWMLYLKRRKQKKLTAARQSL<br>AGHYIDQNAKPLWITYATQTGVAEQLAWSTATSLQEAHQPQVKSQVQLTEADLQHQHEQILFVI<br>STYGTGEAPDLASNF AKLLKTNLELQHVKYAVLALGSKEYPDTYCSFGHTVDEWLKNNGAKA<br>LFDIIEVDNANPADIQWNQALVKA TKLDLHAVNIEKVFDNWTLQQRDLLNPNLSLGGPAYNIEL<br>TASHEAVWQAGDIAEIQPGNSPERINKFLQHHHILKNAVVDLSLQVSIKALWNKDLTGEIEPFAN<br>LDHLLQLPTLPTREYSIASIPSQVLRLLVVRQQYDESGDLGLGSGWLTQHTTEINQNVALRIRNE<br>SFHLIDDNRPIICNGTGIAGLMSLLHTRTRHNYTENWLIIFGERQRAHDFFYASTIEAWQTMGM<br>LKRLDLAFSRDQEQRYVYVQDIIRQNAEELINWIERGAVLYVCGSIDGMASGVDQALIHILGEEQV<br>DELROOGRYRRDVY                                                                                                                                                         | 6.4986295 | 0.000369088 | up   |
| A0A9Q4SK06 | Flavoprotein-like superfamily                                               | 23 | 14 | 19  | 1 | 96.5 | MASTAAERKAKQRQEMLKKGFTRKDLWLSKESLEVIEKFKSEHKLSSNDEAINLLKTIVVIEKF<br>KSEHKFNTIDE                                                                                                                                                                                                                                                                                                                                                                                                                                                                                                                                                                                                                                                                                                                                                                                                                                                                                                                                                                                                                                                                                                                                                                                                                                                                                                                           | 7.7372727 | 7.40E-05    | up   |
| A0A9Q7I520 | Uncharacterized protein                                                     | 45 | 4  | 11  | 4 | 8.9  | MSTAAERKAKQRQEMLKKGFTRKDLWLSKESLEVIEKFKSEHKLSSNDEAINLLKTIVVIEKF<br>KSEHKFNTIDE                                                                                                                                                                                                                                                                                                                                                                                                                                                                                                                                                                                                                                                                                                                                                                                                                                                                                                                                                                                                                                                                                                                                                                                                                                                                                                                            | 2.1172617 | 0.001905203 | up   |
| B0VRV5     | TonB-dependent receptor<br>protein                                          | 31 | 16 | 25  | 7 | 78.7 | MSELLRDLRLHYCILMSMGCISSPLVWAEDLNSDVAKLPTLHVEATRDTGTGYPASVFRIEAPQ<br>VDSSSQVNLTEVVKGIPSLQIRNRENYAQDLQLSMRGGFARSTFGVIRGIRLYVDGIPATMPDGG<br>GQTSNIDLSSLDHVEVLTPGFSSLYGNSSGGTILTSTKEGQGGKDSIELSYSGGSHDKSRAGLVQ<br>GAKGANEPSYIISSEYFDTTDGYREHSGAEKVLNNAKLSWNLDDGSKINWVTNYVKINADDPGGL<br>TRADWQNNPKQVVQNVLDYNARKEIEQTQTGLTWSKPINDQHELYAMTYMGQRQVYQYQSP<br>DTVQKNPNTPYQAGGVIDFKRNYGADFRWTGKELLPNTLSIGVALDAMKEDRQGYQNFND<br>TGDKGVK GALRRDEDNTLWNIDPYVQASWQFLPTWRLDTGVRYSNVHYKSKDYIYVGLNGDN<br>SGKTSYEEVLPVSV ALSWQITPEVLAYASYAKGFETPTFTEMAPAQGGASTLDLKPSTSDTYETG<br>LKSQNLGDFTLAVFQTKTKNDIVSAESFGGRSTFRNADKTLREGVEFAWNKKLWRDLIAIASY<br>TYLDATFDSTVPAAGKISEIPEGNAIPGIAKNQAYVSLAWQPSHGLYGGVDVQYMDKYVYVNDT<br>NSDAAPSYSVTSANVGYAWVMGDWVNSFARVDNLFDRNYAGSVIVNDSTQPVGRYFEPADG<br>RNWSAGLRVIKOF<br>MFKILRYKNSPRHFKEMTMLNMWQQLYDPLNNIWLSSAVALIPIIFFLALAVFRLKGSIAGTGT<br>VIALLIALLFFYQMPGQMAFASIIYGFYGLWPISWIIIGAVFLYKISVKTGQFEVIRSSILSITEDQRL<br>QMLLVGF AFGTFLEGAAGFGAPVAITAALLVGLGFKPLYAAGLCLIVNTAPVAFGAMGPIIVAG<br>QVSGVDTMEISQMVGRQLPFLTIIVLFWIMAIMDGWRGVKETWPAVLVGGGAFIAIAYLTSNFI<br>GPELPDITAAIASLVSLTLLFRVWPKPHIFRFEPEAGQTLAQPTTVQRYSIGKIAKAWSPFAILTV<br>MVTIWSVKPFKALFAKDGALEHWIFKLEVPYLHLKVEKMPPIVSEMPPYEAIYKFDWFSATGTA<br>IFIAAITVIFLKMKASEAVTTFGETLNLKTPYISIGMVLAFAFIANYSGLSATLALALSHTGHAF<br>FFSPFLGWLGVFLTGSDTSSNALFSALQATTAQQIGIPEVLLVAANTSGGVTGKMISPQSIACIA<br>AVGLVGKESDLFRFTVKHSIIFTVFVGHITVQAYLVPWMIP | 3.7724832 | 0.002244576 | up   |
| N0A436     | L-lactate permease                                                          | 13 | 6  | 10  | 1 | 62.3 | MNLEQVRLVDEAITSRHSVRAFLSTPIEPEIHKDILRVASRAPSGTNTQPWKVYVVTGYKRDEM<br>ERVCAAQIEVSKNP ELAEQYKETFAYYPEKVVSPFIDRRRENGWGLYGLLDIKKGEKEKMAAQ<br>QLRNFKLFDAPVGIFFTVNKA MGIGSKMDIAMMIQNVMVAAKARGLDTCQAAWNHHPFLVL<br>DILGAADDEELVCAIALGHADPEHIVNTFITPREPVENFAVFLD                                                                                                                                                                                                                                                                                                                                                                                                                                                                                                                                                                                                                                                                                                                                                                                                                                                                                                                                                                                                                                                                                                                                                    | 0.1862711 | 0.048143237 | down |
| N9JQM5     | Nitroreductase domain-<br>containing protein                                | 56 | 13 | 26  | 2 | 26.4 | MNLEQVRLVDEAITSRHSVRAFLSTPIEPEIHKDILRVASRAPSGTNTQPWKVYVVTGYKRDEM<br>ERVCAAQIEVSKNP ELAEQYKETFAYYPEKVVSPFIDRRRENGWGLYGLLDIKKGEKEKMAAQ<br>QLRNFKLFDAPVGIFFTVNKA MGIGSKMDIAMMIQNVMVAAKARGLDTCQAAWNHHPFLVL<br>DILGAADDEELVCAIALGHADPEHIVNTFITPREPVENFAVFLD                                                                                                                                                                                                                                                                                                                                                                                                                                                                                                                                                                                                                                                                                                                                                                                                                                                                                                                                                                                                                                                                                                                                                    | 9.1143973 | 0.001574766 | up   |

|        |                                                            |    |    |     |   |      |                                                                                                                                                                                                                                                                                                                                                                                                                                                                                                                                                                                                                                                                                                                                                                                                                                                                                                                                                                                                                                                                                                                                                                                                                                                                                                                                                                                                                                                                                                                                                                                                                                                                                                                   |           |             |    |
|--------|------------------------------------------------------------|----|----|-----|---|------|-------------------------------------------------------------------------------------------------------------------------------------------------------------------------------------------------------------------------------------------------------------------------------------------------------------------------------------------------------------------------------------------------------------------------------------------------------------------------------------------------------------------------------------------------------------------------------------------------------------------------------------------------------------------------------------------------------------------------------------------------------------------------------------------------------------------------------------------------------------------------------------------------------------------------------------------------------------------------------------------------------------------------------------------------------------------------------------------------------------------------------------------------------------------------------------------------------------------------------------------------------------------------------------------------------------------------------------------------------------------------------------------------------------------------------------------------------------------------------------------------------------------------------------------------------------------------------------------------------------------------------------------------------------------------------------------------------------------|-----------|-------------|----|
| N9JQN7 | Aspartyl/glutamyl-tRNA(Asn/Gln) amidotransferase subunit B | 81 | 29 | 147 | 1 | 53.7 | MAEAQKLKLDGWVEVIGIEIHTQLATNSKIFSGSSTEFQDPNTQASLVDLAMPGVLPVLNEKV<br>VELAIRFGLGIDAYIDQASVFARKNYFYPDSPKGYQISQMDNPVGLGHIDIQLEDGTTKRIGVTR<br>AHLEEDAGKSVHDQFEGMSGIDLNRAGTPLLEIVSEPDMSVVEEAVAYIKAIHTLVRWLGISDGN<br>MAEGSFRADCNVSLRRPGQPFGRCELKNLNSFRFIEQAINVEIERQMEILEWGGGEIDQETRLFD<br>NKMETRSMRSKEEANDYRYFPDPLLPVIIPDEQIEAIKATMPPELPAARRARFIADFGVTEYDAH<br>VLTLSREMAADFYEAVVAAAGGAKQGKIAANWVMGEFSGALNKAGLELTDSPVSAEQLGGMIA<br>RIVDNTISGKIAKQVFGFMWESEGKSADDIIAEKGLKQETDTGAIEAIIKEVLAANEKMVEEYKS<br>GKEKAFNGLVGQVMKASKGKANPAQVNELMKKLLIG<br>MTDIVIVNGARTAMGGFQGSLSGLTAPELGAVTIKEAARAGLQPTDVEEVIMGCVLPAGLKQG<br>PARQAMRKAGLPDSTGAVTINKLCGSGMKAVMQAADMIKAGSAEIVVAGGMESMTNAPYVLP<br>KARAGYRMGHGEIKDHMFFDGLDAETGRLMGSFAQDMANTRGYTREQMDDFAIRSLKRAQT<br>AITEGYFKDEIVPVTVSTRKGDVIVDQDEQPLNAKIDKIPSLKPAFAKDGTTITANASSISDGASAL<br>VLTSSVAAQRGLQSLAKIIATASNSQHPSEFTIAPVGAIEKVLKAGWNAQDVLDWEINEAFAM<br>VTMCPIDDFKLDPEKVNIIHGGACALGHPVVGSTGSRIILTLIHALKRTGGKKGVAAALCIGGGEATA<br>MNFTLNSQNSLPDDATQGCCLIGRAWIPSQISGSPSPILRGNQVFDISEKFHTISELLESADPLKALSE<br>IEGRPVSIDELFANTVAEPDTNKAYFLAPIDLQVIKAAGVTFAASMLERVIEEQAGGDAQKAQSI<br>REVVQGVIGDNLKTIPEGSEKALQLKEYLIEQKMWSQYLEVGIGTDAEIFTKAPVLAAVGTGQNI<br>GIHPKSEWNNPEPEVVLVANSQGGKILGATLGNVNLRFDFEGRSALLLSKAKDNNASCAIGPFIRL<br>FDHTFTLNDIRTCDELVIQIGTDNFVNLGVSSMSQISRPEDLIQOTLNENHQYPDGFVFLGTFLF<br>APTQDREQAGAGFTHKVGDVVRIHSPKLGTLTYNTVMTSDKATPWNFGINALMRNLKQRELL<br>MIKKAILPVAGLGSRFLPASKSIPKEMVTVVDRPAIEYVVHEAIKAGIEQIILVTHSSKSSIENYFDR<br>NFELETILEEKKKFDLLAEIRQIIPAYVSVVSIRQPPLGLGHAVLCAKSVVQDDFAVLLPDVVLV<br>KDNSSQNDLARMISRYNKNRAAQIMVESVPDHLVDQYGIVDVAKSPNIGESVAVQGIVEKPAVG<br>TAPSNLSVVGRIYILPAKIMQLEKTPRGAGNEIQLTDAIALLQIETVEAYRMQGGQTFDCGSKLG<br>YLKAVLHYGVEHPKLGNDFKQLIQELKL | 3.2201135 | 6.15E-05    | up |
| N9KZS5 | Acetyl-CoA C-acetyltransferase                             | 83 | 21 | 102 | 1 | 40.8 | MAEAQKLKLDGWVEVIGIEIHTQLATNSKIFSGSSTEFQDPNTQASLVDLAMPGVLPVLNEKV<br>VELAIRFGLGIDAYIDQASVFARKNYFYPDSPKGYQISQMDNPVGLGHIDIQLEDGTTKRIGVTR<br>AHLEEDAGKSVHDQFEGMSGIDLNRAGTPLLEIVSEPDMSVVEEAVAYIKAIHTLVRWLGISDGN<br>MAEGSFRADCNVSLRRPGQPFGRCELKNLNSFRFIEQAINVEIERQMEILEWGGGEIDQETRLFD<br>NKMETRSMRSKEEANDYRYFPDPLLPVIIPDEQIEAIKATMPPELPAARRARFIADFGVTEYDAH<br>VLTLSREMAADFYEAVVAAAGGAKQGKIAANWVMGEFSGALNKAGLELTDSPVSAEQLGGMIA<br>RIVDNTISGKIAKQVFGFMWESEGKSADDIIAEKGLKQETDTGAIEAIIKEVLAANEKMVEEYKS<br>GKEKAFNGLVGQVMKASKGKANPAQVNELMKKLLIG<br>MTDIVIVNGARTAMGGFQGSLSGLTAPELGAVTIKEAARAGLQPTDVEEVIMGCVLPAGLKQG<br>PARQAMRKAGLPDSTGAVTINKLCGSGMKAVMQAADMIKAGSAEIVVAGGMESMTNAPYVLP<br>KARAGYRMGHGEIKDHMFFDGLDAETGRLMGSFAQDMANTRGYTREQMDDFAIRSLKRAQT<br>AITEGYFKDEIVPVTVSTRKGDVIVDQDEQPLNAKIDKIPSLKPAFAKDGTTITANASSISDGASAL<br>VLTSSVAAQRGLQSLAKIIATASNSQHPSEFTIAPVGAIEKVLKAGWNAQDVLDWEINEAFAM<br>VTMCPIDDFKLDPEKVNIIHGGACALGHPVVGSTGSRIILTLIHALKRTGGKKGVAAALCIGGGEATA<br>MNFTLNSQNSLPDDATQGCCLIGRAWIPSQISGSPSPILRGNQVFDISEKFHTISELLESADPLKALSE<br>IEGRPVSIDELFANTVAEPDTNKAYFLAPIDLQVIKAAGVTFAASMLERVIEEQAGGDAQKAQSI<br>REVVQGVIGDNLKTIPEGSEKALQLKEYLIEQKMWSQYLEVGIGTDAEIFTKAPVLAAVGTGQNI<br>GIHPKSEWNNPEPEVVLVANSQGGKILGATLGNVNLRFDFEGRSALLLSKAKDNNASCAIGPFIRL<br>FDHTFTLNDIRTCDELVIQIGTDNFVNLGVSSMSQISRPEDLIQOTLNENHQYPDGFVFLGTFLF<br>APTQDREQAGAGFTHKVGDVVRIHSPKLGTLTYNTVMTSDKATPWNFGINALMRNLKQRELL<br>MIKKAILPVAGLGSRFLPASKSIPKEMVTVVDRPAIEYVVHEAIKAGIEQIILVTHSSKSSIENYFDR<br>NFELETILEEKKKFDLLAEIRQIIPAYVSVVSIRQPPLGLGHAVLCAKSVVQDDFAVLLPDVVLV<br>KDNSSQNDLARMISRYNKNRAAQIMVESVPDHLVDQYGIVDVAKSPNIGESVAVQGIVEKPAVG<br>TAPSNLSVVGRIYILPAKIMQLEKTPRGAGNEIQLTDAIALLQIETVEAYRMQGGQTFDCGSKLG<br>YLKAVLHYGVEHPKLGNDFKQLIQELKL | 4.6551086 | 9.37E-06    | up |
| S3TD50 | Fumarylacetoacetase-like, C-terminal domain superfamily    | 3  | 1  | 2   | 1 | 42.7 | MAEAQKLKLDGWVEVIGIEIHTQLATNSKIFSGSSTEFQDPNTQASLVDLAMPGVLPVLNEKV<br>VELAIRFGLGIDAYIDQASVFARKNYFYPDSPKGYQISQMDNPVGLGHIDIQLEDGTTKRIGVTR<br>AHLEEDAGKSVHDQFEGMSGIDLNRAGTPLLEIVSEPDMSVVEEAVAYIKAIHTLVRWLGISDGN<br>MAEGSFRADCNVSLRRPGQPFGRCELKNLNSFRFIEQAINVEIERQMEILEWGGGEIDQETRLFD<br>NKMETRSMRSKEEANDYRYFPDPLLPVIIPDEQIEAIKATMPPELPAARRARFIADFGVTEYDAH<br>VLTLSREMAADFYEAVVAAAGGAKQGKIAANWVMGEFSGALNKAGLELTDSPVSAEQLGGMIA<br>RIVDNTISGKIAKQVFGFMWESEGKSADDIIAEKGLKQETDTGAIEAIIKEVLAANEKMVEEYKS<br>GKEKAFNGLVGQVMKASKGKANPAQVNELMKKLLIG<br>MTDIVIVNGARTAMGGFQGSLSGLTAPELGAVTIKEAARAGLQPTDVEEVIMGCVLPAGLKQG<br>PARQAMRKAGLPDSTGAVTINKLCGSGMKAVMQAADMIKAGSAEIVVAGGMESMTNAPYVLP<br>KARAGYRMGHGEIKDHMFFDGLDAETGRLMGSFAQDMANTRGYTREQMDDFAIRSLKRAQT<br>AITEGYFKDEIVPVTVSTRKGDVIVDQDEQPLNAKIDKIPSLKPAFAKDGTTITANASSISDGASAL<br>VLTSSVAAQRGLQSLAKIIATASNSQHPSEFTIAPVGAIEKVLKAGWNAQDVLDWEINEAFAM<br>VTMCPIDDFKLDPEKVNIIHGGACALGHPVVGSTGSRIILTLIHALKRTGGKKGVAAALCIGGGEATA<br>MNFTLNSQNSLPDDATQGCCLIGRAWIPSQISGSPSPILRGNQVFDISEKFHTISELLESADPLKALSE<br>IEGRPVSIDELFANTVAEPDTNKAYFLAPIDLQVIKAAGVTFAASMLERVIEEQAGGDAQKAQSI<br>REVVQGVIGDNLKTIPEGSEKALQLKEYLIEQKMWSQYLEVGIGTDAEIFTKAPVLAAVGTGQNI<br>GIHPKSEWNNPEPEVVLVANSQGGKILGATLGNVNLRFDFEGRSALLLSKAKDNNASCAIGPFIRL<br>FDHTFTLNDIRTCDELVIQIGTDNFVNLGVSSMSQISRPEDLIQOTLNENHQYPDGFVFLGTFLF<br>APTQDREQAGAGFTHKVGDVVRIHSPKLGTLTYNTVMTSDKATPWNFGINALMRNLKQRELL<br>MIKKAILPVAGLGSRFLPASKSIPKEMVTVVDRPAIEYVVHEAIKAGIEQIILVTHSSKSSIENYFDR<br>NFELETILEEKKKFDLLAEIRQIIPAYVSVVSIRQPPLGLGHAVLCAKSVVQDDFAVLLPDVVLV<br>KDNSSQNDLARMISRYNKNRAAQIMVESVPDHLVDQYGIVDVAKSPNIGESVAVQGIVEKPAVG<br>TAPSNLSVVGRIYILPAKIMQLEKTPRGAGNEIQLTDAIALLQIETVEAYRMQGGQTFDCGSKLG<br>YLKAVLHYGVEHPKLGNDFKQLIQELKL | 2.6185843 | 0.015338542 | up |
| V5RCJ8 | UTP--glucose-1-phosphate uridylyltransferase               | 24 | 7  | 23  | 1 | 31.9 | MAEAQKLKLDGWVEVIGIEIHTQLATNSKIFSGSSTEFQDPNTQASLVDLAMPGVLPVLNEKV<br>VELAIRFGLGIDAYIDQASVFARKNYFYPDSPKGYQISQMDNPVGLGHIDIQLEDGTTKRIGVTR<br>AHLEEDAGKSVHDQFEGMSGIDLNRAGTPLLEIVSEPDMSVVEEAVAYIKAIHTLVRWLGISDGN<br>MAEGSFRADCNVSLRRPGQPFGRCELKNLNSFRFIEQAINVEIERQMEILEWGGGEIDQETRLFD<br>NKMETRSMRSKEEANDYRYFPDPLLPVIIPDEQIEAIKATMPPELPAARRARFIADFGVTEYDAH<br>VLTLSREMAADFYEAVVAAAGGAKQGKIAANWVMGEFSGALNKAGLELTDSPVSAEQLGGMIA<br>RIVDNTISGKIAKQVFGFMWESEGKSADDIIAEKGLKQETDTGAIEAIIKEVLAANEKMVEEYKS<br>GKEKAFNGLVGQVMKASKGKANPAQVNELMKKLLIG<br>MTDIVIVNGARTAMGGFQGSLSGLTAPELGAVTIKEAARAGLQPTDVEEVIMGCVLPAGLKQG<br>PARQAMRKAGLPDSTGAVTINKLCGSGMKAVMQAADMIKAGSAEIVVAGGMESMTNAPYVLP<br>KARAGYRMGHGEIKDHMFFDGLDAETGRLMGSFAQDMANTRGYTREQMDDFAIRSLKRAQT<br>AITEGYFKDEIVPVTVSTRKGDVIVDQDEQPLNAKIDKIPSLKPAFAKDGTTITANASSISDGASAL<br>VLTSSVAAQRGLQSLAKIIATASNSQHPSEFTIAPVGAIEKVLKAGWNAQDVLDWEINEAFAM<br>VTMCPIDDFKLDPEKVNIIHGGACALGHPVVGSTGSRIILTLIHALKRTGGKKGVAAALCIGGGEATA<br>MNFTLNSQNSLPDDATQGCCLIGRAWIPSQISGSPSPILRGNQVFDISEKFHTISELLESADPLKALSE<br>IEGRPVSIDELFANTVAEPDTNKAYFLAPIDLQVIKAAGVTFAASMLERVIEEQAGGDAQKAQSI<br>REVVQGVIGDNLKTIPEGSEKALQLKEYLIEQKMWSQYLEVGIGTDAEIFTKAPVLAAVGTGQNI<br>GIHPKSEWNNPEPEVVLVANSQGGKILGATLGNVNLRFDFEGRSALLLSKAKDNNASCAIGPFIRL<br>FDHTFTLNDIRTCDELVIQIGTDNFVNLGVSSMSQISRPEDLIQOTLNENHQYPDGFVFLGTFLF<br>APTQDREQAGAGFTHKVGDVVRIHSPKLGTLTYNTVMTSDKATPWNFGINALMRNLKQRELL<br>MIKKAILPVAGLGSRFLPASKSIPKEMVTVVDRPAIEYVVHEAIKAGIEQIILVTHSSKSSIENYFDR<br>NFELETILEEKKKFDLLAEIRQIIPAYVSVVSIRQPPLGLGHAVLCAKSVVQDDFAVLLPDVVLV<br>KDNSSQNDLARMISRYNKNRAAQIMVESVPDHLVDQYGIVDVAKSPNIGESVAVQGIVEKPAVG<br>TAPSNLSVVGRIYILPAKIMQLEKTPRGAGNEIQLTDAIALLQIETVEAYRMQGGQTFDCGSKLG<br>YLKAVLHYGVEHPKLGNDFKQLIQELKL | 3.1981094 | 0.000413844 | up |

**Table S3: DEPs in XDR vs. DS strains.**

| Protein ID | Description                                           | Protein Coverage (%) | Peptides | PSMs | Unique Peptide Number | Mass [kDa] | Protein Sequence                                                                                                                                                                                                                                                                                                                                                                                                                                                                                                                                                                                                     | FC XDR/DS | P-value XDR/DS | Regulate |
|------------|-------------------------------------------------------|----------------------|----------|------|-----------------------|------------|----------------------------------------------------------------------------------------------------------------------------------------------------------------------------------------------------------------------------------------------------------------------------------------------------------------------------------------------------------------------------------------------------------------------------------------------------------------------------------------------------------------------------------------------------------------------------------------------------------------------|-----------|----------------|----------|
| A0A009GAT0 | Short-chain dehydrogenase/reductase SDR               | 23                   | 4        | 7    | 4                     | 27.0       | MKIQGKHFVITGGGSLGAATAEYLVKQGASVTLVDMNVEAGEQQAKQLGPKADFVKLDVTD<br>EVAAEQFFKDLVKHSHLHGLVNCAGIGPSAKVVGREGVHDLGLFAKTLNINVTGTFNMLRFA<br>ADAMSKNTVEAGEEDRGVIVNTASVAAFDQGIQAAYSASKGAIVAMTLPIARELARHAIRIMTI<br>APGIMETPMLKGMPQNVQDALGQMVPYPYPSRLGKPEEFARLVAHIAENSYLNGEVIRLDGAIRM                                                                                                                                                                                                                                                                                                                                             | 2.0835149 | 0.002310928    | up       |
| A0A009GKU9 | UDP-glucose 6-dehydrogenase, bacterial type           | 40                   | 12       | 27   | 1                     | 47.2       | MKIALFGTTLYAGVMAALLAEYGNQIYWCTSVTCEENISILSYDQDEVNHYLNKQRKAGFLKES<br>PFSEIPLDIEVYLCFSPQTQIELALKTVEKLSERPIVHPRLMINGSTFGLHGTDQLKQHLPKDEWVY<br>FPDVIQEGNAINSVLNVKHVIVGVESY AQDTMQELLRPFRRFSYQYLFMPILDAEFTKLSISGML<br>ATRISYMNDLAMVAEKLGDIANVKHGIAADTRIGAAAYLSAGVGFGENFSDILTLSSTVSGTG<br>AKSRLLEQVWAINEQQKEILFRKLVNYYHCDLSGKTVAIWGASFKENTSSHTNSPIHILLAALW<br>AQQVKVRLHDPQALDEIATTYGDREDLVLCADQYEAQAQGAHALCLVTAWKQYWSPDFKQLQ<br>QLMQHPLILDGRNIYDPA YVKS GFAYEGVGR L                                                                                                                                                        | 3.5105708 | 2.43E-05       | up       |
| A0A009GY40 | Flavoprotein pyridine nucleotide cytochrome reductase | 69                   | 17       | 57   | 17                    | 39.8       | MSQFVPLKVKSSITPQTDEAICIAFDVVPPEQQEQFQFQPGQHLTIRHLTEAGEIRRCYSICSYAGKE<br>DISIAVKKIDQGQFSNWANDHLKVGDVLEVMPQGQVFFQKAAKMGQQNYLGVAAAGSITPILSI<br>IKQVLFEGPEANFTLLYGNRSWKQTMFAEQIMDLKDDQFKERFQLINIFSRFNDSSELMNGRIDAE<br>KLKQLFDYEVLETNFDHVFACGPDEMNAVENTLPNFGIAKERIHTERFHTGQARKRSVEADA<br>NRKEEKVNILDGRELIVSVAQDDESILDAALRAGADLPYACKGGVCATCRCKVLSGEVDMFLN<br>YSLEEDEVEKGYVLSCQTLPGKSNVRLSFDE                                                                                                                                                                                                                               | 3.8748642 | 0.011906512    | up       |
| A0A009HBN0 | AMP-binding enzyme, C-terminal domain superfamily     | 27                   | 10       | 12   | 10                    | 63.4       | MQQERLSYASGPSTQPLLGMTIGE QFDQACQQYAEKEAIVSFHQNRRLTYKALQDEVNAFACSL<br>LKLGLKKGDR LAIWS PNCV EWTITQFAAFKAGIILVNLTAYKSHELEYVLNKV SCKGLIASQF<br>KTTDYQELLTKIAPELTTCTDKVLSSERLPHLKFVVIKIDDQHTGIYRFSDDLTTPTSEQLFKLQL<br>ARQLQFDEINIQFTSGTTGNPKGTMLTHHNILNNGYFVGE GIRLTPQDKVCISVPLFHCFGMVM<br>GNLACVTHGATMVYPSAVFNPLETLKAIHQERCTAAYGVPTMFATLEHEQFNDFDLSLRTGI<br>MAGSPCPREIMQRVIDRMHMSEITICYGMTETSPVSVQSSVNSIDKRVSTVGHVHPHVEIKIVD<br>LEGQIVPQGT LGELCVRGYSVMAGYWGEEKTREVIDAAGWMHTG DIAEMDQDGFIKIKGR IK<br>DVVIRGGENLFPKEIEDFLYTHPDVSDVQVIGLPDAKYGEELCACILHEHHQVDEDSIRQFCKEH<br>ISHNKVPRYVRRFNEFPMTASGKAQKFKLQEIMRAELNLMGNVFD | 2.0331583 | 0.011389836    | up       |
| A0A009QD14 | Enoyl-CoA hydratase/isomerase family protein          | 43                   | 6        | 16   | 6                     | 27.9       | MQELIKASTAADGVLLLTLNRPEKRNALNNATLQCLCELLEEAEHNAQVKAVVLTGNAQCFAA<br>GADLSELAAMD AVSLQLDIRPKLWQKIDAFSKPLISAVNGYALGAGFELVLHSDMVICGENARF<br>ALPEI GLM LPGA GTQRLARLVGQQLTMRWAMTGMISAKQAEQHGCISQVVPTELTVEYAV<br>QLAAKIAKQAPLAIRVIKQSIKSIHETTLSQGLKFERQNFVWLAATKDRNEGINAFFEKRPVFRG<br>E                                                                                                                                                                                                                                                                                                                                    | 3.5824164 | 0.001466599    | up       |
| A0A009S9H1 | DMT family protein                                    | 11                   | 1        | 2    | 1                     | 13.4       | MSPTVLA FVLLIISNCFM TLAWYGH LKFLHHPFWQAILFGWAIALLEYSFMIPATRLLS DQGWT<br>LGEMKITQEVVTLIVFVPMVLLFKQPFKLDYVWAMLCLFGCVYFVFRSQ                                                                                                                                                                                                                                                                                                                                                                                                                                                                                            | 2.1481773 | 2.08E-05       | up       |
| A0A062IHP7 | Ribosome hibernation promoting factor                 | 54                   | 5        | 14   | 5                     | 12.8       | MQITIRGHHLAITPAIEENIKAKFNQLTKHLDQVNSMQIKLTKDHQIDKRSNKGSSNHVAEAI VRL<br>PGIELFAQATADDMYTSIKKLEKLKQLLKYRKMQC TYSQVAVSI                                                                                                                                                                                                                                                                                                                                                                                                                                                                                                 | 2.0372474 | 0.000109003    | up       |
| A0A090B7C1 | NirD/YgiW/YdeI family stress tolerance protein        | 6                    | 1        | 1    | 1                     | 12.8       | MKMLKVILMTAGMATAGVVVANTPVNQAAIAPATVTTVKQALASKDNTPVKLHGQVVKSLG<br>DEKYQFRDKSGSITIDVDELWQGRAVSANTNVTLIGEVDIDYKPLKRVEIDVDQVQF                                                                                                                                                                                                                                                                                                                                                                                                                                                                                           | 3.6694291 | 0.007846562    | up       |
| A0A090B850 | FinQ                                                  | 35                   | 13       | 30   | 13                    | 44.5       | MASLNSEFQIPLKVVTTTRLNHMKINLPQLVKKIEKRAIENLKRKDKKKEQIDLLITWDDWIYAAL<br>DADHERIHGSADPHPLPTFKNNM VSGVYEKALKNVMGHFGVKATVPAWAANIKVGEHIPKEL<br>LDRLPVTTGELVTLGNWMLTKNIYRFEDIVINELIKTFGNGVIPNHILNLPDL CVYIQTDNAKGLT<br>FENRQVVGVLFCVTELCGDRLLVSTMYLDDGMPRTIAIMLNEDQDIEASLTNFVDQFQQDYDPE<br>TMASDLKERLKIQKLNINLVWFSQSKPEVTP LTPDATNKPVQFVEVKKEKRLFEAGKYKTFKIG<br>SETARKLTKLYEEIEVAKAEGKVS GREPHLRKSHWHLYWYGKKGRYERYDFLLIPVTIVGGVSK<br>_                                                                                                                                                                                      | 3.7584108 | 0.017189116    | up       |
| A0A097I5C2 | FnIC                                                  | 40                   | 10       | 44   | 2                     | 42.8       | MKKLKLMTVVGTRPEIIRLSRVMAACDEYFDHVIVHTGQNYDYELNEIFFTDLGIRKPDHFLNA<br>AGATGAETIGNVIIAVDKILDEVKPEALLVLGDTNSCMAVLP AKRRKIPTFHMEAGNRCFDMRV<br>PEINRRIVDHTADINLTYSTIARDYLLAEGLPADLVIKSGSPMF EVLHHYKAKIEASDVLERLNL<br>KEHEYFIVSAHREENINSQNF LDLVEMLNAVAEKYKYPVIVSTHPRTRKRIEELNV EFHPLIQLL<br>KPLGFSYDYNKQLS AKAALSDSGTINEESSILNFPALNLRQAHERPEGMEEA VMVGLK AERIL<br>QGLAILEGQTRGEDRLLRLVEDYSMPNVSEKVVRIHMSYTDYVNRVIWKQF                                                                                                                                                                                                      | 0.1666574 | 0.013408089    | down     |

|            |                                         |    |    |    |    |      |                                                                                                                                                                                                                                                                                                                                                                                                                                                                                                                                                                                                           |           |             |      |
|------------|-----------------------------------------|----|----|----|----|------|-----------------------------------------------------------------------------------------------------------------------------------------------------------------------------------------------------------------------------------------------------------------------------------------------------------------------------------------------------------------------------------------------------------------------------------------------------------------------------------------------------------------------------------------------------------------------------------------------------------|-----------|-------------|------|
| A0A0E1FIC9 | Carbohydrate deacetylase YdjC-like      | 8  | 2  | 2  | 2  | 30.2 | MAKVCYCADDFAMNAEISDAIIQLIEQGALQATSCMTQSDLWETAAAALKPFSDRVDIHLHLNLTHAFASGNLVFPLPMLIVRAWSASLNRELITQCIEEQWDLFVSVLGGKQPDFIDGHQHIHQFPFIRDI<br>LLQLLKEKFTGWIRNLQPINPPYRFKTRMLSALGSNSLAKACQTYHFNQNGQFAGIYDFKLT<br>NYGQLNQYWLANKDHLIMCHPALAQSKDQDPIQHARIQEYQYFSSDQFQLDCQQYGIQLTR<br>LGAMQ                                                                                                                                                                                                                                                                                                                          | 2.8036745 | 0.000572588 | up   |
| A0A0E1FL10 | Glucose-6-phosphate isomerase           | 26 | 13 | 20 | 9  | 62.9 | MSKSIEQFPKDLSSPLIQLKSSVEKNSKLHIKELFALEPERFQNYSVKFDQLFFDYSKRITKNILE<br>QLVALANNKQLTQWINRFLSQDKINCTEQREAMHWALRLPSEYSKFPELAKQVHIQLQRMVTL<br>VEKIHAGQYRGATGEVIQDVVNIQVGGSDLGPHMVTHALADFKVKTAKPLNVHFVSTMDGSQL<br>SDLLHQLRPETTLFISSKSFGTIDTLSNAQTVRWLEKALGKHDRVVKSHFIGVSTKAIEKMTFTEW<br>GIAPDNQLLLWDVWGGRYSLWSCIGFPALITIGIDGFOQLLAGAHAVDEHFQNTSFERNIPVLM<br>LLGIWNNFNLIQTHAVLPYDGRLLYFAAYLQQLLEMESNGKSVQRDGGQKVELDTCPVWVGEV<br>PNAQHAFYQLLHQGTQAVSCDFIAPVQRYNADHFTYVENAEALIEQHHLALSNCCLAQSRLAFG<br>NEALDAAELKNLPIYKQYEGNQPSSTLLLDELNPYNLGMIALIEHKKVQSVIWNINPFDQWG<br>VEKKGQIADQLLPILNGVQNDFSKLDASTRGLIKILLGKVDG | 0.2123071 | 0.004067271 | down |
| A0A0E1PTG5 | Outer membrane efflux protein           | 51 | 22 | 51 | 19 | 51.5 | MENTMSKSTIVSRGLILSTLSIALVACVNMQAPQPAITSHIPQNFQSNHSGKMAIEKSYKEFISDPK<br>LLQVIEISLNNRDLRTATLNIERVQOEYQITKNSQLPTIGVTGNVAVRQVSPSINPNPVSTFQVG<br>LGMTAYELDFWGRVQNLKDAALNNYLATQSAKEAVQIGLISNITQVWLVNYAFAQANLNLAEQT<br>LKAQVDAYNLNKRRFDVGDSEVPLKQAQISVETARNVDVATYKTIQIQAKNLLDLLAGHPVPQ<br>NLLPDHAIQNTIFEKNFAAGLPSDLLNHRPDLKAAEYELRVAGANIGAAKARMPFTISLTGSTGY<br>ASSELKDLFKTGNFAWSIGPNIDLPIFDWGTTRKTNKIAETDQKIALAKYEKAIQSAFREVDALA<br>THAHIGERLDAQRRLVSATAATYKLSMARYKAGVDSYFTVLDAQRSAYAAQQGLLALEQIKLN<br>NQIEIYKVLGGGISKV                                                                                          | 2.2015614 | 0.005500687 | up   |
| A0A0E1PV91 | Lipoprotein                             | 49 | 10 | 18 | 10 | 27.8 | MHQTNKRSIAIALLFIVYSKCCSFATIPYFYIFYAYSTYLLQLVLFVVMKKVLQGAFFPFVIFASGM<br>LLGCDQTDHAKESQESVQTNQISDQADDSQEQEITATQNKTELKNGNVFYIVRDAANLQKKA<br>GDYIEKLDKTDQLDVEQAIQDKDQHELKTTVTTLKAQLEGLNQAALLGLDIRSQEVENIRQSLQA<br>NQQALSMPLLNKLEQINFQDQIEKQLNTIQMDMVKLAAMIMAGDEKSDSKTDS<br>MKKFLLTFAVAISSYSIAYADV AEDIKSNIQKNYPATTVTQVKNKPLTGIYEVVMGRNVAYTDK<br>DGRYFIFGNLFDMKQTDLTTPTSSNKVEVGFNPADRLKDAIKTVKGNKGRKLVVFSDDPCPY<br>CQQLERNLQSIDNVTIYTFLYPLESIHPTAKTTAVSIWCSKNPGKAFQDYMIENIKPSSKNCAHPID<br>RNIEFASSMNIQGTPLIFEDGSMVPGAVGVSELERLLNSSQKSK                                                                         | 2.8707707 | 0.001192664 | up   |
| A0A0E3KX17 | Thiol:disulfide interchange protein     | 45 | 7  | 11 | 7  | 26.6 | DGRYFIFGNLFDMKQTDLTTPTSSNKVEVGFNPADRLKDAIKTVKGNKGRKLVVFSDDPCPY<br>CQQLERNLQSIDNVTIYTFLYPLESIHPTAKTTAVSIWCSKNPGKAFQDYMIENIKPSSKNCAHPID<br>RNIEFASSMNIQGTPLIFEDGSMVPGAVGVSELERLLNSSQKSK                                                                                                                                                                                                                                                                                                                                                                                                                     | 0.4990737 | 0.03425805  | down |
| A0A0J1ACY0 | Gp49-like PF05973 family protein        | 17 | 2  | 2  | 2  | 13.7 | MAWDVETTELFDWSLAEQDENAQDKILASLLVSELGPNLGRPHVDTIKESKYPNMKEIRVQVK<br>GHPIRGFFAFDPERKAIIVLCAGDKKGLNEKAFYKEMIKIADEQYEQYLDRDNYGDK                                                                                                                                                                                                                                                                                                                                                                                                                                                                              | 0.3100382 | 0.014124653 | down |
| A0A0Q1HCL9 | L-alanine-DL-glutamate epimerase        | 52 | 12 | 20 | 4  | 40.2 | MYRTIETILVDIPTIRPHQLSVTTMRTQTLVLVKITTTDQIGVWGEATTIGGLNYGEESPEVSKAN<br>IDTYFAPLLTSVKDLNVAQTLKLRKLNINGNRFAKCAIQTALLDIQAKRLGVPLSEVLGGRLRNSL<br>PVLWTLASGDTEKDIAEARKMIELKRHNTFKLIGARPLQDDVDHVIAIKKALGADVSVRVDVN<br>RAWSELECIHQIQQLDQGGIDLIEQPCAIQNTALRHLRFDVAIMADEALTGPDSAYRIAKNH<br>GADVFAVKIEQSGGLIEACEVGIAGLAGIDLYGGTMLEGPVGSIASAHVFATFETLAFGTFLFGP<br>LLLTEEILKEPLRYENFELHLPTAPGLGIEIDEDKIEKLRR                                                                                                                                                                                                           | 2.0594246 | 0.000305644 | up   |
| A0A125S0J9 | Dihydropteroate synthase                | 80 | 15 | 70 | 2  | 30.3 | MSYFLSCTEIIIIEAPMNKSLIIFGIVNITSDSFSDDGGRYLAPDAAIAQARKLMAEGADVIDLGPASS<br>NPDAAPVSSDTEIARIAPVLDALKADGIPVSLDSYQPATQAYALS RGVAYLNDIRGFPDAAFYQP<br>LAKSSAKLVVMHSVQDGGADRREAPAGDIMDHIAAFFDARIAALTGAGIKRNLVLDPGMGFFL<br>GAAPETLSVLRARFDELRLRFDLPVLLSVSRKSFLRALTGRGPGDVGAATLAAELAAAAGGADFI<br>RTHPRPLRDGLAVLAALKETARIR                                                                                                                                                                                                                                                                                           | 7.3373026 | 0.009361366 | up   |
| A0A126W935 | Nicotinate-nucleotide pyrophosphorylase | 44 | 9  | 22 | 1  | 30.5 | MSIPQSLEQSIQINIQQALQEDIGDGDITAMLTPEDEQATATIISREDMVLGQPWVNALISAYD<br>NTVQVTWLKHEGDRVAANEAFKLKLAGSARSLLTVERPALNFIQTLASAVATKTAEYVQHLEGLN<br>TKLLDTRKTLPLGLRIAQKYAVTVGGGKNHRLGLFDALFIKENHIMAAGGIAQAIKAHQIAPGKP<br>VEVEVETWDELNQALEAGADIVMLDNFSQQMIDAVKHVAGRCKLEASGNITIEENLREVATTG<br>VDYISMVGLTKDVKAVDLSMRFNA                                                                                                                                                                                                                                                                                                 | 7.1278649 | 0.001170788 | up   |
| A0A158LWX7 | Thiosulphate/Sulfate-binding protein    | 46 | 13 | 28 | 13 | 37.1 | MRFSQLKVGVI AALLSVSSFAAEFLNVSYPDPTRELYTDFNKQFGTYWKQRTGQDIEFKQSHGG<br>SGKQARAVIDGLNADVVTLALAADIDEIAEKAKLLPTDWQKKLPQNSTPYTSTIVFLVRKGNPK<br>QIKDWGDLIKPGVEIHTPNPKTSGGARWNYLAAWAWAKHQVGGNDAKAQEIVRQIYKHTKVL<br>DSGARGATTTFAERGIGDVLAWENEAHLAIREQPQKFEIVTSLILAEPPVAIVEKNAAKKGNL<br>TIAGYLNLYLSPAGQEIAARNFYRPRNAAVLKKYSNVFKPLKLV TIDKEFGGWTKVQKQHF<br>DNGGVFDQIVKINSAEK                                                                                                                                                                                                                                         | 3.0946621 | 0.046670866 | up   |

|            |                                                         |    |    |     |   |      |                                                                                                                                                                                                                                                                                                                                                                                                                                                                                                                                                                                                                                                                                                                       |           |             |      |
|------------|---------------------------------------------------------|----|----|-----|---|------|-----------------------------------------------------------------------------------------------------------------------------------------------------------------------------------------------------------------------------------------------------------------------------------------------------------------------------------------------------------------------------------------------------------------------------------------------------------------------------------------------------------------------------------------------------------------------------------------------------------------------------------------------------------------------------------------------------------------------|-----------|-------------|------|
| A0A158LX87 | Phosphoethanolamine transferase                         | 14 | 6  | 26  | 1 | 60.2 | MFNLIIAIWLGAAILNIGFYHQVHTLTPYFGVKAILFLAATLILVATYYAVLQILNWKWTAKIFAILLIFIGGFSSYFVNTLGVIIISPDQIQNMVQTDVSEVTDLISLRFVLTWVFFVILPIFLITQVFKFQKEKVSRLLLKKVFSLVASFVAVGVLLFTYYVDFAAIFREHRDLKGMISPOQNSISLMSYHKKAPKKNLPLVIYQGDAAHQVQRVQKNLPLKMLLVVGETARAESFSLNGYAKNTNPELSKQDIFNFSQVSSCGTATAVSVPCMFSGMPPRADYDEQLASHREGLLDIAKRAGYQVTWIDNNSGCKGACDRVEQYQIPEDLKQKWCKDGECLDDILIDSLKQYLASIPKDDKRPRLLVVLHQMGSHGPAYYKRAPEGYQPFKPTCDTNAIQGCSPAELINSYDNTIVYTDHVLVSMINTLKEVSNYQTFGWYLSDHGESTGEHGMYLHGSPYSIAPSQQTHIPMIMWFSDGWKQNNLAQVNCNQQTKQKLSQDNLFPSLLSMLDVKTVQVINPQLDMLHSCANVN                                                                                                                                                             | 10.622329 | 3.50E-06    | up   |
| A0A1E3M2G1 | Phenylacetic acid degradation bifunctional protein PaaZ | 53 | 28 | 106 | 2 | 76.7 | MLEQAHLEGTSTDTDFQSSGLQLPHLASVYVGTWSSDEELRTVYHAITGESIYAVSSHGIDMKRVVQYAKQIGSELANWTFHQANALKQIAQHLLERKEDFYKLAYATGATRDKAWIDIEGGIQTLFAYSSLVRRELNDEKIITEDSWIQLSKNGTFGAKHILSPKAGVAVHINAFNFIWGMLEKIAPTLLAGVPCIVKPATDGAQLTQAVVKAIEETHVLPKGSLLQICGQTYDLLEQLGPQDCVFTTGSAYTGQKLRNHPHLNKYSIPFSMEADSVNSAILSPPDANEETVDFVREVREMTTKAGQKCTAIRRAFVPEENLATVQEKLTAKLAKVVGDPQKEETTMGALASIKQKHDVAEKVAELSKDAKIVFGGNDSTFTNADHPEKGAFFAPTLLVCEQPLQATNVHTTEAFGPVCTLMPYQNIIEELADLVSRGEGSLVASVVKNNDENIEQIJKIAPWHGRVHVLDAESAKESTGHGSPPLPHLVHGGPGRAGGGELGGIRAVKHVMQRTAIQGSPLSLTQITHSWTAGSKVNERDVRVHPFKKSFDELVIGERLLTARRTVTEADIVNFACLSGDYFYAHTDKIAAAESFFGERVAHGYPVSAAGLFDAAQGPVIANYGMDNLRVFEVVKIGDSIQVELTCKQKTPKPKDPSQPAHGVVVWDIKVKNQRGELVATYDILTLVAREA | 2.1042205 | 0.000119866 | up   |
| A0A1E3M9X9 | MFS transporter                                         | 10 | 4  | 5   | 4 | 49.2 | MNNALEERRSTFALSIFALRMLGLFMIIPVFSVVGQSYQYATPALIGLAVGVYGLSQAILQIPFSLADRFRSRKPLVVFGLLLFAIGGAIAGLSDTIYGVIIGRAIAGAGAVSAVVMALLADVTRREEQRTKAMAAMGMSIGLSFVAVSLGPWLTSLVGISGLFVTTIMGLIAIAMLVLPKPTRHHRNYQQGYMAQLKQVIQMGDLNRLHVSFVALHLLLTAMFIYVPSQLIEFAHIPLASHGLVYLPPLVISLFFAFPSIIAEKYRKMRFGLTAITGIAGLGLLIFGYQSKYVLLAGLGIFFIAFNVMEALLPSWLSKSAPIQSKATAMGVNASSQFLGAFFGGTLGGQLMLHNTAIGWSVLAGIAIHWLLISFGLAQPRYLSIVLPLPQVQQVNEWTTQLLAIRGIEEVVVMPPDQQVAYIKVDKQSLDDASRRDLTQLFGKEVAI                                                                                                                                                                                                                                                      | 2.1273575 | 6.07E-05    | up   |
| A0A2U8NGD1 | Wza                                                     | 33 | 11 | 28  | 1 | 41.3 | MHKGSRVKYCQFFSVLALSLSAASCAVTSGLQTYDIPSEGVYKTDLGTTVNVVKISQETLPAIQPAQIDYQRDYASLFGKQTIYRLSPGDVLSIQLWAYPEITPPVNNISNEQSIQANGYPIDQSGYIQFPLVGRYKAAGKTLAQVNRELHNQLARFLKNPDIIVRVVLSYEGQRFSVQGSVLKGGQFYLSDDQPIIYAALGLAGGVSDKGDNTYIQLIRNGRTYNLNTIDLERAGYSLHKLLVQPNDTIYVSTRENQKIYVMGESGKNQALPMRDQGMTLSDALGESLGLNPLSASASRIYVLRNPNDRTTELYHNLMSIGDFGLANQFRMRSNDIVYVDATGLTRWQRVNVNQHIFSSALYNIDRLGQ                                                                                                                                                                                                                                                                                                                                    | 6.0208426 | 0.009272748 | up   |
| A0A2U9QFX2 | FnlC                                                    | 47 | 11 | 52  | 3 | 42.1 | MTVVGTRPEIHRLSRVMAACDEYFDHILVHTGQNYDYELNEIFFTDLGIRKPDHFLNAAGATGAETIGNVIIAVDKILEEVQPEALLVLGDTNSCMAVLPKRRKIPTFHMEAGNRCFDMRVPEEINRRIVDHTADINLTYSTIARDYLLAEGLPADLVKGTGSPMFEVLHHYKAKIEASDVLERLNLKEHEFYFIVSAHREENINSQDNFLDLVEMLNAVADKYKYPVIVSTHPRTRKRIEELNVEFHPLIQLLKLPGFSDYNKLQLSAKAALSDSGTINEESSILNFPALNLRQAHERPEGMEEAAVMMVGLKAERILQGLAILEGQTRGENRLLRLVEDYSMPNVSEKVVRIIMSYPDYVNRVIVWKQF                                                                                                                                                                                                                                                                                                                                   | 0.232939  | 0.009243759 | down |
| A0A333V6L2 | Thioesterase family protein                             | 30 | 6  | 10  | 6 | 29.9 | MNAYYQLLNRTIGPQGEVIAHYCSTVHAQGANPHEQHMAMPASGVIAVELEQFSPRQDMRIGRISFDIFGLLAFGEFTIKTHVIRAGKTIELIEAELQAQKTCIVARAWRMCTQDSSEIAGLEDQPIHHPDTFTEWSGMKRWPGGFIQTLVTKTNDQHRAGKGVWLNNDKEMVEGQSTTDFAHLIGMVDAA                                                                                                                                                                                                                                                                                                                                                                                                                                                                                                                       | 2.1827376 | 0.001638443 | up   |
| A0A335J3M4 | Thiolase                                                | 60 | 17 | 57  | 1 | 43.1 | EQILTLRKMTK<br>MEDVLCDFIRTPIGRYAGALSAVRADDLAALPIKYLKDKHPNLPWNTVDEVFLGCANQAGEDNRNVARMATLLAGLPDTPAMTVNRLCASGLDAVGLAARSIKAGEAQFVLAGGVESMSRAPFVQAKLTEAFSRTPEIYDTTIGWRFVVKQLKAQYGTDSMPETAENVAEKYQISREDQDAFALRSQOKTAAAQQNGFFNDEILPVEITDRKKNVVVNDRDEHPRETTLEALAKLKAPFKKEGGSVTAGNASGVNDGAACVLITNREFADTHGLKPLARVIGIASAGVEPKYMGIGPVPVAVQKILKQTLGLTLDQMDVIELNEAFAAQSLACMRELGLKDDDERVNPNGGAIALGHPLGMSGTRLVITATRELKRRGGRYALCTMCVGVGGQVALILENLN                                                                                                                                                                                                                                                                                     | 5.6399191 | 3.46E-05    | up   |
| A0A385EQQ7 | SnoaL-like domain-containing protein                    | 64 | 5  | 10  | 1 | 14.2 | MSLSQKEIAVRFLELAAAGEVDEAYGNYTAPNFKHHNPPYAGDKISLKEGMRESAIEPTPNKVLVEQHVIEDGALVAVHSKLEMQMNNKLTILAVVHICRFENEKIAEFWDIGIQPDPVLNENGMF                                                                                                                                                                                                                                                                                                                                                                                                                                                                                                                                                                                        | 2.0106519 | 0.02521531  | up   |
| A0A385ET64 | Uncharacterized protein                                 | 64 | 2  | 10  | 2 | 6.6  | MKLAKTLLATTLALTAASTFAASKHDQAHNTAGEEKVVVSTQEANTANAASDAVGSASEAAPATR                                                                                                                                                                                                                                                                                                                                                                                                                                                                                                                                                                                                                                                     | 2.4323265 | 0.021655299 | up   |

|            |                                             |    |    |     |    |      |                                                                                                                                                                                                                                                                                                                                                                                                                                                                                                                                                               |           |             |      |
|------------|---------------------------------------------|----|----|-----|----|------|---------------------------------------------------------------------------------------------------------------------------------------------------------------------------------------------------------------------------------------------------------------------------------------------------------------------------------------------------------------------------------------------------------------------------------------------------------------------------------------------------------------------------------------------------------------|-----------|-------------|------|
| A0A385EUA0 | 1,2-epoxyphenylacetyl-CoA isomerase         | 58 | 12 | 47  | 3  | 28.9 | MDYQNIIEEKNVGYLTFNRPKALNSFNVDMHREVAEVLSQLWTKNPDVRCVVISGEGRGFCA<br>GQDLGDRVVDPAEAPDLGYSIETYNPLIKTIVNMPKPVICAVNGVAAGAGANIALACDLVIA<br>AKSANFVQAFRLGLVDPDSAGTWFLPRAVGHARAMGLTLLGDKLPAAETAKIEWGMIWDVVEDA<br>ELKTKVTELAERLAKQPTFGLSLIKKAIHQSSNNTFDEQMLLERDLQRIAGRSEDYREGVQAFMN<br>KREP NFKGR                                                                                                                                                                                                                                                                       | 4.6632177 | 2.86E-05    | up   |
| A0A385EUT6 | 3-hydroxyadipyl-CoA dehydrogenase           | 38 | 17 | 35  | 17 | 57.1 | MTDLDSRARIIVIGSGTMGIGIAQLAIVNGHTTVLYDLDAQKAQAVQGLGQTFKKLVEKSKL<br>TEQQADEALARLTVVNQIEALRDADLVIEAVVEKKEVKQSLFKQLAEICSAQTIFASNTSSISVTA<br>ISAGITHPERVVLHFFNPAPVMKLV EIVQGLKTPNSLCLALKNLMLNWKKIPVLTKSTPGFIVN<br>RIARPFYAEGFRALQEQVTSYDQLDYALKQCGGFAMGPCELTDLIGQDVNFVSVTQSVYQEFFYE<br>PRYRPSLVQKELVDAGAWGRKSKQGFYTYNEKNQYQTFQPQAVVAKPVD AHIQLKGTWSQLP<br>AFLTRLGLKSGSASDDNILQIDDIDLRLSQGESANIH YLSRKVV LMDWHHDFEQAEALVLSHNEL<br>CETNDLAKVEAYFAQFGMSVMWIKDHPALLTLRTIALLINEACEASLHGVASLEDIDNAMKYGV<br>NYPKGPYQWLTQMGGAYVLQTLNLYALYGEEKYRASIYLKQYVAKTQNIATQYSRDMTEFA | 4.6983635 | 2.48E-05    | up   |
| A0A385F0B4 | Phosphatidylglycerophosphatase A            | 5  | 1  | 1   | 1  | 19.2 | MDTNTLHKPPIHFKDMSWFNRCIVFCGVGFGSGLAPKAPGTFGSAFALLFVPIWLSLGFLLSLIAI<br>LIMSVVGIYICQGTAKILDVHDDGRIVWDEFAGQSITFLPLLQLQINWIWVITGFILFRIFDVWKP<br>WPIRVIDRQVHGGFGIMLDDIAGVWAALCTLIHHS                                                                                                                                                                                                                                                                                                                                                                               | 2.3384263 | 0.025399419 | up   |
| A0A385F1H2 | Uncharacterized protein                     | 30 | 2  | 3   | 2  | 12.1 | MHSKIIGLTVIMGISSMAFAEPAIQGETLESLSKARITTNVNTQAATPTAQTSDATTEVKVEDID<br>PIIEKTEETVKAAIQPAQATAEAVVTPLIASSQLNVSVDIDVAHPT E                                                                                                                                                                                                                                                                                                                                                                                                                                         | 3.5949194 | 0.031256102 | up   |
| A0A3R9RP79 | Uncharacterized protein                     | 62 | 4  | 6   | 4  | 10.9 | PVSNSGYWTGQFDRLVGT LILESDGTGVICQDHLGTARVMSVKLLNDRLYSQDGTYWKISNFTP<br>TSLELNYALGGGYKMIRDNGLKFASPACKDKLNTK                                                                                                                                                                                                                                                                                                                                                                                                                                                      | 2.0059312 | 0.000802109 | up   |
| A0A3S0KUX5 | Domain of unknown function DUF306, Meta/HsJ | 60 | 16 | 115 | 1  | 41.1 | MKIKYLILALLPFSLMACQTVSNTQAPIVSEQQN LATTSEYAWTYQNVKASKPLILNFNADG<br>KLAINTGCNGQGGTGWKVEGNQLVTSPLASTMMACQDDLMKQEQLSNSIFSEAKLPIESNNNGQ<br>AILSVTDKAGQKHIFQGEKATHQTALTDYSWSYQ PENTKKPIVLNFTNDRLSIDTGCNRQGTTW<br>KVENNTIVTTDVMSTMACEPALMKQE QFSSSLFQKRAIPFELNTTNVDQPTLTVTDAQQGKY<br>TFTGKMTPEAKYQSEGKTVFLEVAPETKSC TGVAPQTCLOVREVKYDDKGVKTYADKNWSLY<br>YGQIEGFEHNPQRVILRVKRFVKNPAADQSSQADVLDVMVVEQELVKKPKK                                                                                                                                                         | 0.4813625 | 0.001105413 | down |
| A0A411MUY4 | Patatin-like phospholipase domain           | 41 | 18 | 36  | 6  | 57.7 | MFEKIRSDMNP HQAYRIKKLQRQLDMAESYEEWKS FALKLDEETGAQEWKFDNSSPYFDAELIS<br>YRYTLLKRYRQQHRTL DLIYLLKEGLTYDIANIGHPMLFAATHVGTKKLIEDYIEEVSQSLAYIAS<br>SECITFORKKKIEFFENCEKAYGQPALMFSGGATLGLFHTGVCKALIEQDLM PKVLSGSSAGAIM<br>TGMLGISASEDIQNLLNGEQFFSDAFHFRKRLRELKGNNGIADVHYLKKFLIENLGDLT FEEAFKK<br>SGLNINVAVAPYDATENPRIMNAIMTPNVLVWSAVLASCAPVLPFPVRLT SKRYDGEHTPYMA<br>NTKWVDGVSRSDFPQERMARLYNLNYT IASQVNPHVVPFMQDDARRFRKDVLSWPERILRRQG<br>KVL SMLMDFTRQRLGAISPVRRLLDHGYGVV GQRYYGDVNIIAKYSLKHAYTLQNRPHLF<br>KRLQREGERATWPKISSIETHARIGKTIQH CLEVLRFEEKKQPESYYAEA       | 2.3507761 | 9.44E-05    | up   |
| A0A429MK36 | catechol 1,2-dioxygenase                    | 64 | 13 | 34  | 13 | 33.2 | RQQIDALVKQMNVDTAKGEVDARVQQIVVRL LGDLFQAIEDLDIQPSEVWKGLEYFTDAGQAN<br>ELGLLAAGLLEHYLDLRADEADAKAGITGGTPRTIEGPLYVAGAPESVGFARMDDGTETGKID<br>TLIIEGTVTDTDGNIIENAKVEVWHANSLGNYSFFDKS QSDFNLRRTIFTDADGKYVALTTMPVG<br>YGCPEGTTQALLNKLGRHGNRPSHVHYFVSAPG YRKLTTQFNIEGDEYLWDDFAFATRDLV<br>ATAVDVTDPAEIQRRGLDHAFKHITFNIELVKEAAA PSTEVERRASA                                                                                                                                                                                                                               | 2.6308623 | 0.014646065 | up   |
| A0A4P8VDY7 | Universal stress protein A family           | 47 | 10 | 15  | 7  | 31.2 | MSKIIACIDGSLVTNTVCDYAAWFSDKLN SPIKLLHVIDKPKAKAPQDLSGAIGLSRETLKELV<br>ELEERKKGKIELEHGQILLREAKNYLVEKFSID AQSFQRHGSVLETIMGMEDDIRVLMGKHGNET<br>EHDSSKIGTHIENVVRALHHPVLITSAPFSPPKS FLIAFDGSQTARKCVERIASSPLKGLAVHLVY<br>VGNNPSEMQNQLSWAKEQLESQGFNITSNTLDGEVDKAIINYAEQH QIDLIVVGAYGHSKIRQFF<br>IGSTTTKVITSANKPVLLLR                                                                                                                                                                                                                                                  | 2.745513  | 0.004392489 | up   |
| A0A4Q4GN90 | Uncharacterized protein                     | 36 | 5  | 12  | 5  | 16.1 | MMQPIHSTLQYIHISVPEILLSNIEIKNSWQDYNQEW S YRLDPPHSHFPQRDLYIISKNIETE<br>DIKLLDNIVVKNSKNKDDLKNIVEAETVIKEILDLSNYIPIENWLNDTGNRSIVESMIDKNVKVL<br>LDII                                                                                                                                                                                                                                                                                                                                                                                                                | 0.3730088 | 9.96E-06    | down |
| A0A4Q4H670 | Enoyl-CoA hydratase/isomerase               | 40 | 8  | 17  | 8  | 28.9 | MSYQFLQLEQQQVAYIWLNRPELHNAFN TTVIEELHACFKQINTRDDIRVVVLAGRKGSFSAG<br>ADLNWMKQAGQASSAENEADALKLAQMLDALATL KQPTIARVHGIAFGGGMGLASACDICIAS<br>TDAKFATSEVRLGLAPSTISPYVIRAIGARQASRYFLT AERISAREAKQIGLAHEVAEDAEDLKKV<br>QEIVDALLGGPHAQAASKQLIQMVSNTM SNDLLQQT AHHIAQVVRQGSSEAKEGLSAFLNKQQ<br>PAWVSNNSNNNN                                                                                                                                                                                                                                                              | 2.2411993 | 0.004437908 | up   |
| A0A505MKS4 | 1,2-phenylacetyl-CoA epoxidase subunit A    | 29 | 7  | 16  | 1  | 35.5 | MENNYQKFEQNIANEITIEAKDQMPDAYRKT LIRIQIGHSEIVGMLPEGNWITRAPTLKRKA<br>VLLAKVQDEAGHGLYLYSAAETLGADRDDMMEKLIDGKMKYSSIFNYPTLTWADVA AIGWLV<br>DGAIVNQVALCRTSYGPYARAMVRICKEESFHQRQGF EAMMALAGGTPEQKQMAQDAVNRY<br>WWPALMMFGPSDEHSPNSAQM AWKIKRFSNDEL RQKFVDNTVPQILQLGLEVPDPDLKNEE<br>TGHYEFGEIDWHEFNEVIAGRPCNHERIEARRKAWEN GKWVRDAVVYAKKQQL EANKVA                                                                                                                                                                                                                      | 2.7650739 | 0.042392874 | up   |

|            |                                               |    |    |     |    |       |                                                                                                                                                                                                                                                                                                                                                                                                                                                                                                                                                                                                                                                                                                                                                                                                                                                                                                                                                                                                                                                                                                                                                                                                                                                                                                                                                                                                                                                                                                                                                                                                                                                                |           |             |    |
|------------|-----------------------------------------------|----|----|-----|----|-------|----------------------------------------------------------------------------------------------------------------------------------------------------------------------------------------------------------------------------------------------------------------------------------------------------------------------------------------------------------------------------------------------------------------------------------------------------------------------------------------------------------------------------------------------------------------------------------------------------------------------------------------------------------------------------------------------------------------------------------------------------------------------------------------------------------------------------------------------------------------------------------------------------------------------------------------------------------------------------------------------------------------------------------------------------------------------------------------------------------------------------------------------------------------------------------------------------------------------------------------------------------------------------------------------------------------------------------------------------------------------------------------------------------------------------------------------------------------------------------------------------------------------------------------------------------------------------------------------------------------------------------------------------------------|-----------|-------------|----|
| A0A505ZPT1 | Glucose-6-phosphate isomerase                 | 35 | 13 | 26  | 9  | 62.6  | MKSIEKFPKELVSPIAQLHSLVEKNSKLIHKLFAAEQDRFQNYSVKFDQLVFDYSKHRITKSVL<br>EQLFALAKTKQLTHWIERLFSQDKVNCTEQRAAMHWALRLPSEYSKFPPELTKQVHTQLQRMYA<br>LVEKIHAGQYRGATGEVIQDVVNIQVGGSDLGPMVTHALCDFKVKTAKPLNVHVFVSTMDGSQ<br>LSDLLHQLRPETTLFISSKSGFTIDTLSNAQTVRQWLEKALGKHERVVKSHFIGVSTKADKMT<br>WGIAPENQLLLWEWVGGYRSLWSCIGLPIALSVGIDGFQQLLAGAHAHVEHFNQTSFEQNPV<br>MALLGVWNNNFLNIQTHAVLPYDGRLLKYFAAYLQQLLEMESNGKSVQRDGGQKVELDTCPIVW<br>EVGPNAQHAFYQLLHQGTQAVTCDFIAPIKRYNADHFTYVENAEALVEQHHLALSNCCLAQSRL<br>AFGNEALDSAEKLNLPYKQYEGNQPSSTLLKELNPNYSLGMLLALYEHKVFVQSVIWNINPFQ<br>WGVEKQKQIADQLLPILNGAQNLDLSTLDASTRGLIKILLGKVDG                                                                                                                                                                                                                                                                                                                                                                                                                                                                                                                                                                                                                                                                                                                                                                                                                                                                                                                                                                                                                                                       | 2.950822  | 0.00369683  | up |
| A0A517D2C4 | Two-component system response regulator PmrA  | 37 | 5  | 28  | 5  | 25.5  | MTKILMIEDDFMIAESTITLLQYHQFEVEWVNNGLDGLAQLAKTKFDLILLDLGLPMMMDGMQV<br>LKQIRQRAATPVLIIASARDLQNRVDGLNGLGADDYLIKPYEFDLARIHALLRRSGVEAQLASQ<br>DQLLESGLVNLVEQHIAATFKGQRIDLNSREWAILPLMTHPNKIFSKANLEDKLYDFDSDVTSN<br>TIEVYVHHLRAKLGKDFILTIRGLGYRLGQS<br>MFELSCKAQDFAERTKKFIQEEIEPVEAKFWEEVHELNPDGNWKKWQWPELLETLSKAKQAG<br>LWNMFLPDEKLGAGLSVQYEAHIAELTGRSLLAPTVFNCNAPDTGNMEVLWRYGSEQKQKW<br>LEPLLDGKIRSVFCMTEPDVASSDATNMQATALIDGNEIVLNGKKWSSGLGDPNAKVIIFMAH<br>TPDETKDRHHQHSMVLVPIDTAGVEIQRMLPVFGDYDAPHGHGVEHFNVRVPIENFIGGAGQG<br>FEIAQGRLLGPGRIHHCRCIGAAEKALELMIDRGMRSRTAFGKEILKLGGNLERVADARVAIDQA<br>RLLTLYAAYKMDTLGNMAALTEISAIVVAPSVLEKVVDMAIQLHGGAGVSRDPTLTFGAQA<br>RSLRLADGPDEVHKGMIAKLELAKRGYFGRHKKV                                                                                                                                                                                                                                                                                                                                                                                                                                                                                                                                                                                                                                                                                                                                                                                                                                                                                                                                                               | 6.3911739 | 6.10E-05    | up |
| A0A5K6CRD2 | (R)-benzylsuccinyl-CoA dehydrogenase          | 59 | 19 | 43  | 19 | 45.9  | MHMPSPNTVAPAQGLYQPDEFKDNCGFLIAHMKGESSHHLVETAIHSLSCMTHRGGIAADGK<br>TGDGCGLLLAMPKQFFRDEAKKLSDITLSEIFAVGTVFLNIDPALAQHSKNILTKEIESEGLRVLA<br>WRIVPTNNDALGEIALQSLPAFEQVIVNCPMGVTEVEFNKRLFLARRRAEQQLKNDPLFYVTTL<br>STVISYKGLMMPAAIAEFYTDLADERLKSIIVVFHQRFSTNTLPRWPLAQPFYLAHNGEINTITA<br>NRNWALARTPKFENPLPLGTELNPVNRGTSDSSSLDNMLEILVGGGMDLFRALRMLVPPAWQ<br>NVETLDADLRAFYEFSKHMEA WDGPAGLVIQDGRHAICMLDRNGLRPARWVITKNDYITLAS<br>EIGVWGYEPEDVVSXGRVGPQQLVVDTLTGKVLDTKDVS NHLKNMRPYREWLRDHAI RLNA<br>NPELEEQLV DKG L TGDALKA AQKMFMTFEERDQLLRPIAESGQEA VGSMDGDDTPMAVLSRQV<br>RHVTDYFRQQAQVNTNPPIDPLRESIVMSLETCLGREQNVFEQGEHADRIIISPPVLSNSKMQQIR<br>SIERAGYEAVDIDLNYAETEGLQAAITRICEESAQAVRDGKTLIVLTDKNIRQGYLPANAALATG<br>AVHHHLIKTGLRDTANIMVETGFARDPHQFAVLLGFGATAIYPPYLA YDVINDLIAK GELLGDPH<br>AQANFRKGIEKGLLKVLSKMGISTVAS YRGGQLFEAVGLSSEVVDQCFLGVPSRIQGATFVDLEN<br>DQKCLAATAWSNRKPIDQGGLLKFVFGKEYHAFNPDVINSLHKA VRSKGYEDFKEYAELVNNR<br>PIATIRDLFKLKTNPVPIVQVESVEAILPRFDSAGMSL GAL SPEAHEAIAI AMNTIGRSNSGEGG<br>EDPARYGTIRNSKIKQIASGRFGVTPAYL TSAEVLQIKVAQ GAKPGEQQLPGGKVNGLIARLRY<br>SVPGVTLISPPPHHDYI SIEDLSQLIFDLKQVNPKAMVSVKLVSEPGVGTIAAGVAKAYADFITISG<br>YDGGTAA SPLSSIH HAGSPWELGLSEAHQALRVNDRGKVRVQTDGGLKTGLDVIKAAILGAES<br>FGFGSTPMIALGCKYLRIHLNNCATGVATQDHLRQEHYIGEPQMLINFFHFIAEETREWLAAL<br>GVASLKD LIGRVDLLEVLPGETEKHAHLDSLALLTSHPA AEGKAQYCEVEGNAPFDKGVLAER<br>MVEEMPLPAIESSAGGQFNFNVNCDRSIGARVSGE IARRYG N LGMEAH PVMNLTGTAGQSLG<br>VWNAGGLHIRLEGDANDYVYKGMAGGRISIFPPKGS PFQTQNTAIIGNTCLY GATGGKLF AAGT<br>AGERFAVRNSGAFAVIEGAGDHCCEYMTGGVVTVLGKVGHNF GAGMTGGFAYVLDLNDNFV<br>DYYNHELIDLTRISTESMEDHKEFLLRIDEHIKETGS AWAYKIRNEFDYSRKFWLVKPKAANL<br>QSLKTTQADPQ | 2.4459057 | 0.003548222 | up |
| A0A5N0FZ32 | Glutamine amidotransferase type 2 domain      | 52 | 53 | 149 | 1  | 162.9 | MLNFFSTLRNKQISLFMFNLIHAIWLGAILNIGFYHQVHTLTPYFGVKAILFLAATLILVATYYAV<br>LQILNWKWTAKIFAILLIFIGGFSSYFVNTLGVII SPDQIQNMVQTDVSEVTDLISLRFVLWITFFVI<br>LPIFLITQVKFKQEKVSRLLKKVSLVASLAVVGVLLFTYYVDFAAIFREHRDLKGMISPPNSISS<br>LMSYYHKKAPKKNLPLVIYQGD AHQVQVQK NLPKLMILV VGETARAESFSLNGYAKNTNPEL<br>SKQDIFNFSQVSSCGTATAVSVPCMFSGM PRVDYDEQLASHREGLLDIAK RAGYQVTWIDNNSG<br>CKGACDRVEQYQIPENLKKK WCKDGE CYDDILIDSLKQYLS TIAKDDDRPRLIVLHQVGSHPA<br>YYKRAPEAYQPFKPTCDTNAIQGCSQTELLNSYDNTIVYTDHVL SQMINTLKEISKYQTGLWYLS<br>DHGESTGEHGLYLHGSPYAIAPSQQT HVP MIMWFSESWKQHNL AQVNCLSQQTKQLS QDNLF<br>PSLLSLLDVTTQVINPQLDMLHSCAHVN                                                                                                                                                                                                                                                                                                                                                                                                                                                                                                                                                                                                                                                                                                                                                                                                                                                                                                                                                                                                                                                  | 2.9123303 | 0.00043383  | up |
| A0A6B2QRH5 | Phosphoethanolamine--lipid A transferase PmrC | 23 | 11 | 47  | 1  | 62.2  | MDYETGQILASKNENEKLAPASMTKMMTSYIIEQKLLKGELTENEQVRMNESA WCKGSSSESC<br>MYVPLNGTATVLEMLRGIISQGN DASKAMAEHIAGNEGTF AHMMNQEAKRIGMTNTQFINSTG<br>MPAEGHYSTAKDMAVLAQHIIKDSSKYYPYSEKLEFTNGIKQGNRNALLYTDPVSDGLKTGHT<br>DEAGYCLTSSKRGPMRLISVIFGTPSMSERADQTRALLAWGFANFETANVQPANQVLAKAKV<br>WFGKENEVQVGLAENFNVTMPK GKADGIKTQLVVQPNL NAPLQKGGVVGKLVASLDGKVIAE<br>KPLVALKPV EEA GFFARLIDHIKQFFSNLF                                                                                                                                                                                                                                                                                                                                                                                                                                                                                                                                                                                                                                                                                                                                                                                                                                                                                                                                                                                                                                                                                                                                                                                                                                                                             | 5.6355987 | 1.86E-05    | up |
| A0A6F8TCX5 | serine-type D-Ala-D-Ala carboxypeptidase      | 74 | 19 | 110 | 1  | 37.9  |                                                                                                                                                                                                                                                                                                                                                                                                                                                                                                                                                                                                                                                                                                                                                                                                                                                                                                                                                                                                                                                                                                                                                                                                                                                                                                                                                                                                                                                                                                                                                                                                                                                                | 3.029423  | 0.015825741 | up |

|            |                                                                          |    |    |     |    |       |                                                                                                                                                                                                                                                                                                                                                                                                                                                                                                                                                                                                                                                                                                                                                                                                                                                                                                                                                                                                                                                                                                                                                                                                                                                                                                                                                                                                                                                                                                                                                                                                                                                                                                                                                                                                                                                                                                                                                                                                                                                                                                                                                                                                                                                                                                                                                                                                                                                                                                                                                                                                                                                                                                                                                                                                                                                                                                                                                                                                                                                                                                                                                                                                                                                                                                                                                                                                                                                                                                                                                                                                                                                                                                                                                                                                                           |           |             |      |
|------------|--------------------------------------------------------------------------|----|----|-----|----|-------|---------------------------------------------------------------------------------------------------------------------------------------------------------------------------------------------------------------------------------------------------------------------------------------------------------------------------------------------------------------------------------------------------------------------------------------------------------------------------------------------------------------------------------------------------------------------------------------------------------------------------------------------------------------------------------------------------------------------------------------------------------------------------------------------------------------------------------------------------------------------------------------------------------------------------------------------------------------------------------------------------------------------------------------------------------------------------------------------------------------------------------------------------------------------------------------------------------------------------------------------------------------------------------------------------------------------------------------------------------------------------------------------------------------------------------------------------------------------------------------------------------------------------------------------------------------------------------------------------------------------------------------------------------------------------------------------------------------------------------------------------------------------------------------------------------------------------------------------------------------------------------------------------------------------------------------------------------------------------------------------------------------------------------------------------------------------------------------------------------------------------------------------------------------------------------------------------------------------------------------------------------------------------------------------------------------------------------------------------------------------------------------------------------------------------------------------------------------------------------------------------------------------------------------------------------------------------------------------------------------------------------------------------------------------------------------------------------------------------------------------------------------------------------------------------------------------------------------------------------------------------------------------------------------------------------------------------------------------------------------------------------------------------------------------------------------------------------------------------------------------------------------------------------------------------------------------------------------------------------------------------------------------------------------------------------------------------------------------------------------------------------------------------------------------------------------------------------------------------------------------------------------------------------------------------------------------------------------------------------------------------------------------------------------------------------------------------------------------------------------------------------------------------------------------------------------------------|-----------|-------------|------|
| A0A6H3EK80 | Pyruvate flavodoxin/ferredoxin oxidoreductase, pyrimidine binding domain | 52 | 46 | 90  | 46 | 127.9 | MNIATKVTPIIATKDVSLKDYVSDNGTAFMGTGIQALVRLPLAQTRRDAINGYHTAGFISGYRG<br>SPIGNYDNFLWQVEGLLKSHNVVFPQGVNEDLAATAIWGTQQANLSGQGGYDGVSSWWYGGK<br>PGVDRSGDVLRHANLAGTSSERGGVVALFGDDHSCSSSTVPHQSEHVMIGCGIPIFYPTSVQQILD<br>FGVHAIASRFSGLWTSMKLVSEIVETSASVHVDLDRVTPVIPEDVNFPEGGVNIRWPDHGIQQE<br>ERLYKYRPLAVLAYARANKINTVTPCENARIGIAASGKGYLDTIEALRILGIEDETAQQLGLRV<br>YQVGLIWPLEPQGIREFAKGLEELVIEEKRPILETQIKDELYSLPDDQRPVIGKATDGGKGEWSTS<br>IEEAPLIGHYEQPEPIAKMLAARFLKLDIPESLKVQIQGRIDLLKAEQESKRVIDLAERKPYFCS<br>GCPHNSSTVPEGSRALGGIGCHYIAVSLDRGTETFSQMGEGVSWVGASPFTEKHIFANLGD<br>GTYFHSGYLAIHQSAAKTNITYKILYNDAVAMTGGQHVDGHLVAQLTRQLDAEGIKKQVIVT<br>DEIKLLNEEDGIAPGVEIRHRNELDAVQRELREISGVTALIVYVQTCASEKRRRRKRDAYPDPAERL<br>FINTDICEGCGDCSKKSNCLSIETALGTQRQINQSSCNKDFCAEGFCPSFVTVHTRDMKRPA<br>KFEGISAGWPTSPHQPQLYDVPSRIMVGGIGGTGVVITIGALLGMAAHLEGKATRVMDMAGLAQK<br>GGTVYSYVQLAASDEQISSTKIPAGQCELLIGADAVVAGSAAALSRLKEDALVIVNEDSTPTSEFI<br>KSRDWYAPITDLIDRLRGRVRRQGLVSLPAARIATLLGDSIYTNQLLLGMAWQSGRIPLLRESIE<br>KAIRLNGTAVEKNIEAFRVGCHLASDPTLAARLLAAMPKTKTPQTLAELVEDRSARLTDYWNEA<br>YAAKYRTLVELAAKKLPEELTGTIATQLYRVMAYKDEYEVARLLTGKSFKESIETQFGKGLRLT<br>YHLAPPALLGGLKNVRKRAFGYWMRFPMMMLARLQWLRETFDLPFARQEERQHEQAWRDRYI<br>AFVEALVEAPDNHNLVAEQIAKLPAEVRGYGHIKMKAMDAKQRWDELTPTLKVRN<br><br>MNQFVTNTKNVIRGKYHPEFLQNEVLSDFIHTAQTLPDKTALIEADKTLVSYGELYQQALIMAO<br>HLALKGVKPGHIVGLWLPRIELKLAQLAICLSGAAWLPFDMPTADRIAUCLEDAEAVGMITT<br>DEWYEHLEAEPQTKWTNTELQKTLSESVSLAKTTPDQPAYIITYTSGTGKPKGIVITQKNICHFLR<br>SENSILGIQEODKVVYQGFVAFDMSFEEIWSYLVGATLWIAPKSLVSDPERLCQTLKQEITVLH<br>AVPTLLALFPEDVPLNRIINLGGEMCPDSLVDWRWALPHHQMFNTYGTETTVSASLELLERKPKV<br>TIGKPLPNYGMLVINSERELLEQGETGELCIFGPSVAQGYLGRPDLTADKFIENPWAMSVEEELL<br>YRTGDLAKIDEFGQVHCLGRADDQVKIRGFRVELGEIAALCDIDGITAIVILRPEDGIDQAFI<br>APEIDAKQAEIKELRHNLSQLRPPYMPVNRFEIIEVPRLLSGKIDRKALKARPLTSVDRSESDQ<br>PQNPAAEILFEILNRLFPNPIKLDSDFFDDLGGHSLAAVLISNREHAEYSHLTIQNLYQARRVG<br>AIAALMLEQPEPTLFDISQIQDNPRNQTYKWLCCGIAQLVTIPVLISINLQWLAPFFTYHYFTGGT<br>RDSIPYAIASLLVYVSVIMSSFVLSITVLRLLMLGIGAGRYPLWGLTYFRWWLADRISNISPVVL<br>LSGSTLLNLYLKGAKIGHDVTSSVHIRMPSLLTIEDGVSIGSQVNLNENAKVEHGHVVLGSIHL<br>KQDSYVGSYAVLEENTVLEKQAHVNALTSIEYDVTVPGEIWDGTPAQKIGHIDEQAKLPRPK<br>LSFIRKIAEYGYGVSAIIACLFPIFPSFLLVDWLDVNVFNINPNHNLQIALYFILAIPASAMM<br>MMITAVISGLRKIALPRLETGTAVHGSTYRKFWFAAQILETSLQTLHGLFATIYAPTWFRLMG<br>AKVGNTEISTATGVIPMLTLGEEFSIADAVMLGDEEIKGGWMSLKATKIGNRSFVGNISAYIAD<br>GTVLPDNVLIGVQSKTPDNREMYDGTWFGSPALLLPAREAEEKYDPDHLTFKPSIKRRLMRGI<br>EGLRIVLPAALGIVGYMIVLDVIDVINNYNIETGLVALTLAGLLYGVGCFILVALLKWILIGRYQ<br>PRSAPMWTMFVWVWSEGITSLYESVAIPNFLNYLRGTPMLPFFLRILGVRIGKDVYMDTADITEFD<br>CVSIGDRAEFNSFGPQTHLFEDRIMKIGQVNVGNDVVVNARSILYNANVNNHNAVGLPLTLVM<br>KGENIPAKSAWIGSPAVPWVHK<br>MTFQYQVLANQLAHRIYQDELKPHQKLSLISLDFARQHGISLSTAKSCYELLEARGLIYVVKPKSGY<br>FVVARTPSSPIPDPDFLSLPRHVSNLELHNQIQEAALQSHLVPLGSIQLTPHFIPVEGLRRSIQRAL<br>KNCQPQDFLYCNKQGHEQLRKALSDHWREDGIYIAPEDIFITNGCMPALSLVIQKLTVEVGDILIP<br>TPTYNGHLQLLASLRKQIVEIPADHRGIDLERLESMLQQGLAKVCLMTANYQNPLGYCFSNTEK<br>QKIVELAACYQCFIIEDIFGECGYSSERPLPIRYWDREGYVWICGSVSKSLSSAYRVGWFCLTTK<br>LEHLKLELLVSNIGVNTPLQLGLADFIYSRAYREHLEQLRPNLMRQVEEYRSCILRAFEGIPLASQ<br>PEGGYALWIQLPKSVDSLALYYTAQAQGITVVPGHVFGEDERYRHFIRLNAGHELADVRQAIM<br>SLADWSRQQMQTVS<br><br>MGKVDYSKYAKLSPFELKDNLIELAQSKTDRIMLNAGRGNPNFLATIPRRAFFQLGLFSATESEFS<br>FSYMPPEGLGGFPRTVGLQSRFDNFILNRDKPGVVFLGKAVSYVVDQLGLDPLDPLLEMVEGILG<br>CNYVPDRMLRVSETIIEKEYVLRMGVQGMQKRDLDLFAVEGGTAAMAYIFNSLKENKIIKNGD<br>RIAIGSIFTPYLEIPKLDYVLEEVLEADPKLWQYPESELRKLEDPSIKAFFLVNPSNPSVKMS<br>DEGLAILADIVKRPDLIILTDVYGTAFDNFKLSLFAICPDNTILVYSFSKYFGATGWRLGVIALSN<br>NNVLDKQIANLSKKEKKELEDYSSLTTPASIKFIDRLVADSRNVALNHTAGLSTPQQVQMVLF<br>ALFNMMDSRQSYKKA VKSVVRERDAALYRQLGV DVPTDPNAV DYYTLVNLENTSRTLYGDEF<br>ADWVMKNKNPTELLFRVADETGVVLLPGSGFGVQHP SARASLANLNEYQYAAIGESLRRAFE<br>AYA EYTKKKIK | 2.837405  | 0.017862637 | up   |
| A0A6H3T0T0 | Trimeric LpxA-like superfamily                                           | 18 | 15 | 23  | 2  | 147.9 | RDSIPYAIASLLVYVSVIMSSFVLSITVLRLLMLGIGAGRYPLWGLTYFRWWLADRISNISPVVL<br>LSGSTLLNLYLKGAKIGHDVTSSVHIRMPSLLTIEDGVSIGSQVNLNENAKVEHGHVVLGSIHL<br>KQDSYVGSYAVLEENTVLEKQAHVNALTSIEYDVTVPGEIWDGTPAQKIGHIDEQAKLPRPK<br>LSFIRKIAEYGYGVSAIIACLFPIFPSFLLVDWLDVNVFNINPNHNLQIALYFILAIPASAMM<br>MMITAVISGLRKIALPRLETGTAVHGSTYRKFWFAAQILETSLQTLHGLFATIYAPTWFRLMG<br>AKVGNTEISTATGVIPMLTLGEEFSIADAVMLGDEEIKGGWMSLKATKIGNRSFVGNISAYIAD<br>GTVLPDNVLIGVQSKTPDNREMYDGTWFGSPALLLPAREAEEKYDPDHLTFKPSIKRRLMRGI<br>EGLRIVLPAALGIVGYMIVLDVIDVINNYNIETGLVALTLAGLLYGVGCFILVALLKWILIGRYQ<br>PRSAPMWTMFVWVWSEGITSLYESVAIPNFLNYLRGTPMLPFFLRILGVRIGKDVYMDTADITEFD<br>CVSIGDRAEFNSFGPQTHLFEDRIMKIGQVNVGNDVVVNARSILYNANVNNHNAVGLPLTLVM<br>KGENIPAKSAWIGSPAVPWVHK<br>MTFQYQVLANQLAHRIYQDELKPHQKLSLISLDFARQHGISLSTAKSCYELLEARGLIYVVKPKSGY<br>FVVARTPSSPIPDPDFLSLPRHVSNLELHNQIQEAALQSHLVPLGSIQLTPHFIPVEGLRRSIQRAL<br>KNCQPQDFLYCNKQGHEQLRKALSDHWREDGIYIAPEDIFITNGCMPALSLVIQKLTVEVGDILIP<br>TPTYNGHLQLLASLRKQIVEIPADHRGIDLERLESMLQQGLAKVCLMTANYQNPLGYCFSNTEK<br>QKIVELAACYQCFIIEDIFGECGYSSERPLPIRYWDREGYVWICGSVSKSLSSAYRVGWFCLTTK<br>LEHLKLELLVSNIGVNTPLQLGLADFIYSRAYREHLEQLRPNLMRQVEEYRSCILRAFEGIPLASQ<br>PEGGYALWIQLPKSVDSLALYYTAQAQGITVVPGHVFGEDERYRHFIRLNAGHELADVRQAIM<br>SLADWSRQQMQTVS<br><br>MGKVDYSKYAKLSPFELKDNLIELAQSKTDRIMLNAGRGNPNFLATIPRRAFFQLGLFSATESEFS<br>FSYMPPEGLGGFPRTVGLQSRFDNFILNRDKPGVVFLGKAVSYVVDQLGLDPLDPLLEMVEGILG<br>CNYVPDRMLRVSETIIEKEYVLRMGVQGMQKRDLDLFAVEGGTAAMAYIFNSLKENKIIKNGD<br>RIAIGSIFTPYLEIPKLDYVLEEVLEADPKLWQYPESELRKLEDPSIKAFFLVNPSNPSVKMS<br>DEGLAILADIVKRPDLIILTDVYGTAFDNFKLSLFAICPDNTILVYSFSKYFGATGWRLGVIALSN<br>NNVLDKQIANLSKKEKKELEDYSSLTTPASIKFIDRLVADSRNVALNHTAGLSTPQQVQMVLF<br>ALFNMMDSRQSYKKA VKSVVRERDAALYRQLGV DVPTDPNAV DYYTLVNLENTSRTLYGDEF<br>ADWVMKNKNPTELLFRVADETGVVLLPGSGFGVQHP SARASLANLNEYQYAAIGESLRRAFE<br>AYA EYTKKKIK                                                                                                                                                                                                                                                                                                                                                                                                                                                                                                                                                                                                                                                                                                                                                                                                                                                                                                                                                                                                                                                                                                                                                                                                                                                                                                                                                                                                                                                                                                                                                                                                                                                                                                                                                                                                                                                                                                                                                                                | 2.792456  | 0.000221419 | up   |
| A0A6H3T2F1 | HTH-type transcriptional regulator with aminotransferase domain          | 4  | 2  | 3   | 1  | 54.0  | RDSIPYAIASLLVYVSVIMSSFVLSITVLRLLMLGIGAGRYPLWGLTYFRWWLADRISNISPVVL<br>LSGSTLLNLYLKGAKIGHDVTSSVHIRMPSLLTIEDGVSIGSQVNLNENAKVEHGHVVLGSIHL<br>KQDSYVGSYAVLEENTVLEKQAHVNALTSIEYDVTVPGEIWDGTPAQKIGHIDEQAKLPRPK<br>LSFIRKIAEYGYGVSAIIACLFPIFPSFLLVDWLDVNVFNINPNHNLQIALYFILAIPASAMM<br>MMITAVISGLRKIALPRLETGTAVHGSTYRKFWFAAQILETSLQTLHGLFATIYAPTWFRLMG<br>AKVGNTEISTATGVIPMLTLGEEFSIADAVMLGDEEIKGGWMSLKATKIGNRSFVGNISAYIAD<br>GTVLPDNVLIGVQSKTPDNREMYDGTWFGSPALLLPAREAEEKYDPDHLTFKPSIKRRLMRGI<br>EGLRIVLPAALGIVGYMIVLDVIDVINNYNIETGLVALTLAGLLYGVGCFILVALLKWILIGRYQ<br>PRSAPMWTMFVWVWSEGITSLYESVAIPNFLNYLRGTPMLPFFLRILGVRIGKDVYMDTADITEFD<br>CVSIGDRAEFNSFGPQTHLFEDRIMKIGQVNVGNDVVVNARSILYNANVNNHNAVGLPLTLVM<br>KGENIPAKSAWIGSPAVPWVHK<br>MTFQYQVLANQLAHRIYQDELKPHQKLSLISLDFARQHGISLSTAKSCYELLEARGLIYVVKPKSGY<br>FVVARTPSSPIPDPDFLSLPRHVSNLELHNQIQEAALQSHLVPLGSIQLTPHFIPVEGLRRSIQRAL<br>KNCQPQDFLYCNKQGHEQLRKALSDHWREDGIYIAPEDIFITNGCMPALSLVIQKLTVEVGDILIP<br>TPTYNGHLQLLASLRKQIVEIPADHRGIDLERLESMLQQGLAKVCLMTANYQNPLGYCFSNTEK<br>QKIVELAACYQCFIIEDIFGECGYSSERPLPIRYWDREGYVWICGSVSKSLSSAYRVGWFCLTTK<br>LEHLKLELLVSNIGVNTPLQLGLADFIYSRAYREHLEQLRPNLMRQVEEYRSCILRAFEGIPLASQ<br>PEGGYALWIQLPKSVDSLALYYTAQAQGITVVPGHVFGEDERYRHFIRLNAGHELADVRQAIM<br>SLADWSRQQMQTVS<br><br>MGKVDYSKYAKLSPFELKDNLIELAQSKTDRIMLNAGRGNPNFLATIPRRAFFQLGLFSATESEFS<br>FSYMPPEGLGGFPRTVGLQSRFDNFILNRDKPGVVFLGKAVSYVVDQLGLDPLDPLLEMVEGILG<br>CNYVPDRMLRVSETIIEKEYVLRMGVQGMQKRDLDLFAVEGGTAAMAYIFNSLKENKIIKNGD<br>RIAIGSIFTPYLEIPKLDYVLEEVLEADPKLWQYPESELRKLEDPSIKAFFLVNPSNPSVKMS<br>DEGLAILADIVKRPDLIILTDVYGTAFDNFKLSLFAICPDNTILVYSFSKYFGATGWRLGVIALSN<br>NNVLDKQIANLSKKEKKELEDYSSLTTPASIKFIDRLVADSRNVALNHTAGLSTPQQVQMVLF<br>ALFNMMDSRQSYKKA VKSVVRERDAALYRQLGV DVPTDPNAV DYYTLVNLENTSRTLYGDEF<br>ADWVMKNKNPTELLFRVADETGVVLLPGSGFGVQHP SARASLANLNEYQYAAIGESLRRAFE<br>AYA EYTKKKIK                                                                                                                                                                                                                                                                                                                                                                                                                                                                                                                                                                                                                                                                                                                                                                                                                                                                                                                                                                                                                                                                                                                                                                                                                                                                                                                                                                                                                                                                                                                                                                                                                                                                                                                                                                                                                                                                                                                                                                                | 2.1373708 | 0.02105281  | up   |
| A0A6I4HS79 | Aminotransferase                                                         | 70 | 30 | 213 | 1  | 59.7  | RDSIPYAIASLLVYVSVIMSSFVLSITVLRLLMLGIGAGRYPLWGLTYFRWWLADRISNISPVVL<br>LSGSTLLNLYLKGAKIGHDVTSSVHIRMPSLLTIEDGVSIGSQVNLNENAKVEHGHVVLGSIHL<br>KQDSYVGSYAVLEENTVLEKQAHVNALTSIEYDVTVPGEIWDGTPAQKIGHIDEQAKLPRPK<br>LSFIRKIAEYGYGVSAIIACLFPIFPSFLLVDWLDVNVFNINPNHNLQIALYFILAIPASAMM<br>MMITAVISGLRKIALPRLETGTAVHGSTYRKFWFAAQILETSLQTLHGLFATIYAPTWFRLMG<br>AKVGNTEISTATGVIPMLTLGEEFSIADAVMLGDEEIKGGWMSLKATKIGNRSFVGNISAYIAD<br>GTVLPDNVLIGVQSKTPDNREMYDGTWFGSPALLLPAREAEEKYDPDHLTFKPSIKRRLMRGI<br>EGLRIVLPAALGIVGYMIVLDVIDVINNYNIETGLVALTLAGLLYGVGCFILVALLKWILIGRYQ<br>PRSAPMWTMFVWVWSEGITSLYESVAIPNFLNYLRGTPMLPFFLRILGVRIGKDVYMDTADITEFD<br>CVSIGDRAEFNSFGPQTHLFEDRIMKIGQVNVGNDVVVNARSILYNANVNNHNAVGLPLTLVM<br>KGENIPAKSAWIGSPAVPWVHK<br>MTFQYQVLANQLAHRIYQDELKPHQKLSLISLDFARQHGISLSTAKSCYELLEARGLIYVVKPKSGY<br>FVVARTPSSPIPDPDFLSLPRHVSNLELHNQIQEAALQSHLVPLGSIQLTPHFIPVEGLRRSIQRAL<br>KNCQPQDFLYCNKQGHEQLRKALSDHWREDGIYIAPEDIFITNGCMPALSLVIQKLTVEVGDILIP<br>TPTYNGHLQLLASLRKQIVEIPADHRGIDLERLESMLQQGLAKVCLMTANYQNPLGYCFSNTEK<br>QKIVELAACYQCFIIEDIFGECGYSSERPLPIRYWDREGYVWICGSVSKSLSSAYRVGWFCLTTK<br>LEHLKLELLVSNIGVNTPLQLGLADFIYSRAYREHLEQLRPNLMRQVEEYRSCILRAFEGIPLASQ<br>PEGGYALWIQLPKSVDSLALYYTAQAQGITVVPGHVFGEDERYRHFIRLNAGHELADVRQAIM<br>SLADWSRQQMQTVS<br><br>MGKVDYSKYAKLSPFELKDNLIELAQSKTDRIMLNAGRGNPNFLATIPRRAFFQLGLFSATESEFS<br>FSYMPPEGLGGFPRTVGLQSRFDNFILNRDKPGVVFLGKAVSYVVDQLGLDPLDPLLEMVEGILG<br>CNYVPDRMLRVSETIIEKEYVLRMGVQGMQKRDLDLFAVEGGTAAMAYIFNSLKENKIIKNGD<br>RIAIGSIFTPYLEIPKLDYVLEEVLEADPKLWQYPESELRKLEDPSIKAFFLVNPSNPSVKMS<br>DEGLAILADIVKRPDLIILTDVYGTAFDNFKLSLFAICPDNTILVYSFSKYFGATGWRLGVIALSN<br>NNVLDKQIANLSKKEKKELEDYSSLTTPASIKFIDRLVADSRNVALNHTAGLSTPQQVQMVLF<br>ALFNMMDSRQSYKKA VKSVVRERDAALYRQLGV DVPTDPNAV DYYTLVNLENTSRTLYGDEF<br>ADWVMKNKNPTELLFRVADETGVVLLPGSGFGVQHP SARASLANLNEYQYAAIGESLRRAFE<br>AYA EYTKKKIK                                                                                                                                                                                                                                                                                                                                                                                                                                                                                                                                                                                                                                                                                                                                                                                                                                                                                                                                                                                                                                                                                                                                                                                                                                                                                                                                                                                                                                                                                                                                                                                                                                                                                                                                                                                                                                                                                                                                                                                | 0.2942293 | 0.003361679 | down |

|            |                                                                                             |    |    |    |    |      |                                                                                                                                                                                                                                                                                                                                                                                                                                                                                                                                                                                              |           |             |      |
|------------|---------------------------------------------------------------------------------------------|----|----|----|----|------|----------------------------------------------------------------------------------------------------------------------------------------------------------------------------------------------------------------------------------------------------------------------------------------------------------------------------------------------------------------------------------------------------------------------------------------------------------------------------------------------------------------------------------------------------------------------------------------------|-----------|-------------|------|
| A0A7U3Y047 | Uncharacterized protein                                                                     | 33 | 12 | 17 | 6  | 60.7 | MELKRVNQDFYVAGQITANDIVKIDQGIKTLICNRPDGEADQPNVIEIEEAQRHGLNVIYQP<br>VISGKISDQQVTEFKQLYQNAQKPVLAYCRSGMRAISLWALAEVAPQDAALLVESGNKLGFNLK<br>GLVPRILKRDHEPATIPCYSVVIVGAGAAGISVASSLLCREPHLDVIIDPADTHYYQPGWTMVG<br>GIFKPQVTARSMTSVIPSKVKWMAAVAGFDPEHNQVILEGCQPIQYKALVVCPLKLNWHGIE<br>GLVETLGKNGVTSNYRYDLAPYTWELVQQLNSGKAIFTQPPMPIKAGAPQKAMYLSADYWL<br>KQGKLDISIHFYNTGAVLFGVKEYVPALMQYVEKYGTSLHFNHQLVKVDGPAKKAWFKVNV<br>DENAALVETDFDMLHVPPQQAPDFIRASTLTDEAGWVSVNPNQTLQHTQHANIFALGDMVNAP<br>NAKTAARTQAPIVAVNVIAQLKGEKNFCEYNGYGSCLPTVERGKIVLAEFGYGGKLLPSPFK<br>WVIDGQKPSRLAWLLKERILPPIYWQGMKKGREWMVKPEQG | 0.4212515 | 0.005422655 | down |
| A0A7U4BKB8 | Atypical kinase ADCK                                                                        | 51 | 17 | 61 | 17 | 48.8 | MAKNASSPGKRFMFLAGMTASIAKTVSNIRNLTADEEQKLAAKTKLFDIGLQIADTLGEMK<br>GAVMKVGGQIASQYKDIFPPEVAKAISLQRQAPAMPFAAIQQQVERELGKPLNVAFKSFEQEPFA<br>AASIGQVHKAVLPSGEQVVVKVQYPGVDEACESDLKQVRLALRLMGVVKIDKKLQDQLFAEIQ<br>DLSLAELNYEIEAQNLVFKTFHSHKLDKIIPTVYKDYSSRRILTLSLEQGDSIETASSWPIEIRNTI<br>GRRLIRALGQEMFFLKRHFCDPHGNFAFRQDGSVIHYDYGSKVTLSEIVYSFKRLVNAARHEDI<br>DLIETELLEHLSLAEKGFPSDLYKLWIEVLLRPLTTTYDFAENSSHHDGMLLVKKSLEYWDVF<br>KPSPDTLMVNRTISGHYWNLIHLKVHDNLNLDLFEELVPPSN                                                                                                                            | 2.4948709 | 8.43E-06    | up   |
| A0A7U4BQ44 | Uncharacterized protein                                                                     | 71 | 4  | 23 | 3  | 8.7  | MNSKFSVDQSNKISLKAILEDLGDQMFANKCPDTHPVYDQLRERLRKDRQLLDALDAQDENA<br>NTEERSRSLDIN                                                                                                                                                                                                                                                                                                                                                                                                                                                                                                               | 4.9091896 | 0.043382292 | up   |
| A0A7U4DEJ2 | Acid shock protein                                                                          | 37 | 4  | 10 | 4  | 13.9 | MKMTAKIALFSAIIVTMGSLAACQSTTQPPKPEHGMMQDGPDRDGHHRMKHREFTPEQKAAW<br>EQHRAERKARFEQIQKACEGKAVGQTVNVVQVGDKTLEGTCLNRFEPKRPQPPVNAAPVASQA<br>K                                                                                                                                                                                                                                                                                                                                                                                                                                                       | 2.2344161 | 0.001327044 | up   |
| A0A7U4F8B0 | Ribosomal RNA<br>aminoglycoside-resistance<br>methyltransferase, Gram-<br>negative bacteria | 45 | 10 | 33 | 10 | 30.1 | MDKNDVVKKILESKKYENLDSDIVEKVVSISEKKYKLKEVENYSKKKLHQIWGSYYSAYPNWD<br>KLLKKYNQGGQLSIEDLLKIHSS'TNERVATLNDFYTYVFGNIKHVSSILDFGCGFNPLALYQW<br>NEN<br>EKIYHAYDIDRAEIAFLSSIIGKLTITIKYRFLNKESDVYKGTVDVFLKMLPVLKQDQVNLDF<br>LQLFHTQNFVISFPIKLSGKEKGEENYQLWFESFTKGWIKILDSKVIGNELVYITSGFQK                                                                                                                                                                                                                                                                                                                | 2.0225283 | 0.012510744 | up   |
| A0A7U5XU67 | Peptidyl-prolyl cis-trans<br>isomerase                                                      | 70 | 12 | 49 | 1  | 25.2 | MKKISLVIAASTMSLSVFAATPITNKSPAKDQFSYSYGYLMGRNNTDALTDLNLDFYQGLQEGA<br>QNKTARLTDEEMAKAINDYKKTLEAKQLVEFQKGGQNAQAGAFLAENAKKSGVITTKSGL<br>QYQVLKEGTGKTPKATSRVKVNYEGRLLDGTVPDSSIARNHPVDFQLNQVIAGWTEGLQTMKE<br>GGKTRFFIPANLAYGEVAGDGTIGPNSTLIFDIELLQVLPK                                                                                                                                                                                                                                                                                                                                             | 4.3474903 | 4.95E-05    | up   |
| A0A7U5XUN1 | Uncharacterized protein                                                                     | 67 | 5  | 11 | 5  | 9.7  | MSVIDRAVEKNANLSYVALKVIECFKADAGLDLNYIDDKISEFSDLSNYAALHQAIRLDDKNINR<br>LADKLGVSISDLETTFLVNLKI                                                                                                                                                                                                                                                                                                                                                                                                                                                                                                  | 0.4389467 | 0.02882993  | down |
| A0A7Z1WKR3 | FAD/NAD(P)-binding domain<br>superfamily                                                    | 21 | 8  | 13 | 1  | 45.4 | MSEVLDVVIVGGGLVGGTLALLAQGGVQPTVLDAAAPVLDVEKTL SVMNPRVLALSQATIHL<br>L<br>KTVNVWDDLARQMPYTGMQVWNLNGYGEINFGHESVQRPMPEQALGSMVEPVLNVIAIQK<br>MLEQLTDYRTQVRVTRIEQGVGCWHLQLADGTTLTKLLIGADGANSFVREQAFIDLVDLYK<br>QAAISCAIKTSKPHHYVARQIFLPTGPLAYLPMASLEESENGYQSIWVTLPPDYADEYSALSDA<br>EFMQLLTRESQHMLGEVLDVRSRAQFPLKARAAKQYVKDGLALIGDAAHVHPLAGQGVNIGC<br>LDAAVLCDALLHDLGRGVWAHEQTLMRYEHRKGNQDAMMHMSAIGWLESSELPFLIWARN<br>VGLKQVEQISFLKERFMQQANGLRALQNTQYSR                                                                                                                                             | 2.7927749 | 0.0363443   | up   |
| A0A7Z2CM08 | Uncharacterized protein                                                                     | 6  | 1  | 1  | 1  | 28.7 | MILDDYLGHAANSKKLAQIAIKERRFDDAWKHLNHQKDYYLKHASRMGFSKTETLVIDSSPHE<br>DMANVLRLEGKHKNALSSISYTYKAAAYTANRPIITLEKKLEAYNRAYKKQPFKFLSLLKALP<br>NSDYISVRDLVEIYFPLSPNDDEVAPKERNLSEQEIKNVNDNFLKQRSTARSKHEGIPPLSNKPV<br>KAVKPSYPEPKYPTKVIQNDNLLILGYPASEWIIGLMVGVALLIGLIWLLSVSVR                                                                                                                                                                                                                                                                                                                           | 2.4253152 | 0.003240562 | up   |
| A0A828SQM8 | Muconolactone Delta-<br>isomerase                                                           | 23 | 2  | 2  | 2  | 10.5 | MDVHIPLDMPADKANEIKAVEKAYSQDLQRQGGKWRHIWRITGQYSNISIFDVESNEELHNILQG<br>LPLYPYMDIEVMALNRHPSSVRDDDS                                                                                                                                                                                                                                                                                                                                                                                                                                                                                              | 2.4350006 | 0.020024063 | up   |
| A0A828STC4 | Phenylacetate-CoA oxygenase,<br>PaaJ subunit                                                | 52 | 6  | 13 | 6  | 18.6 | MQMIRHCIDQCWDLVLTQVSDPEIPVLSVVDLGMIRGVEINDQQEIIIVRLTPTYSGCPATDMLKAQ<br>IVEAFTAALTPVKVMVDLSEAWTTDWMSEAGKKLQVYGIAPPEGLAHQCPTHVHLTNGVE<br>CPRCKSRHTRLLTEFSSTACKALYKQCDCLEPFDFYKCI                                                                                                                                                                                                                                                                                                                                                                                                               | 4.5638832 | 1.46E-06    | up   |
| A0A829K6I4 | DAHPh synthase, class 1                                                                     | 7  | 2  | 2  | 2  | 38.8 | MNALNLLTQSNTKETPVSLPVQLKAKYPLVQTFARQIAEHRQIIQNILAGKDQRLMIVITGPCSI<br>HDPVAVLEYADRLQKLQEKVKDQIFIVMRAIYIEKPRTTVGVKGFMYDPNLDGSSNLQLGLEKS<br>RELYLQIIEKGLPIASEILSPMATGYFDDLLAWGAIGARTSESQIHREISSHPYSIGFKNGTDGSIQ<br>IALDAIQSAQNEHQFLGMNQGLPSVIQSSGNPLPHLILRGANHGPNYDLASIQAIREKHKNLPA<br>LVIDCSHGNSGKDPRLRQPEVLQQIVAEERLKTQVKGVMIESHVLDGNQKISCEMYGQSVTDGCL<br>GWDKTEQLLLNVAKQLKASELAHSA                                                                                                                                                                                                           | 0.4931359 | 0.008049031 | down |

|            |                                                                    |    |    |    |   |       |                                                                                                                                                                                                                                                                                                                                                                                                                                                                                                                                                                                                                                                                                                                                                                                                                                                                                                                                                                                                                                                                                                                                                                                                                                                                                                                                                                                    |           |             |      |
|------------|--------------------------------------------------------------------|----|----|----|---|-------|------------------------------------------------------------------------------------------------------------------------------------------------------------------------------------------------------------------------------------------------------------------------------------------------------------------------------------------------------------------------------------------------------------------------------------------------------------------------------------------------------------------------------------------------------------------------------------------------------------------------------------------------------------------------------------------------------------------------------------------------------------------------------------------------------------------------------------------------------------------------------------------------------------------------------------------------------------------------------------------------------------------------------------------------------------------------------------------------------------------------------------------------------------------------------------------------------------------------------------------------------------------------------------------------------------------------------------------------------------------------------------|-----------|-------------|------|
| A0A829KCA3 | Condensation domain                                                | 1  | 1  | 1  | 1 | 112.3 | MQLVHIFCLYDAETRLICQPSYRSMCELTSMQAACWFGRSGNATLGGVAAHLYAEFDGGQFIDLQ<br>KLHLALQRLYKEHPILRLSLSADGIANIMSEKTQQILEVDNFSKLNHDHQIEQMLMQKREQWTHQ<br>KLDLSQGGQARFSSISVLKDNIFRFHVDTDMAIDPSSFLNLMEDLSLFYEDPEISFSRPPNFWDWYQ<br>KIRTDPLKKNQRDRLWWKQRLPHISPAPSLPFHJQEFKTAKSDRLSTWLSPEERKALQQLARE<br>QRITVTNLILGLFAYTLGHTTKDHSFRLNIPTFWREPVLKNVEGTIGDFANLVILDVDMNKTTTL<br>AAFCKQIANQMELLELEHSHYPGVNVLRLDLSRYHGSQAQIAPVVFTAALDLENDNLLSERVRRVFG<br>SMNWVISQGPQVALDAQVAHVDDGILVNWDIRLDALPKEWITNLFESFIHLLKNLAAHPQNT<br>QIISPAQNTSSDRTSQKPLNALQQAAYLLGRTOALPLGGVAMQEFQRQYHGTMDIVLLRQLRTEMV<br>RRHDSLRTYIDKNRLVQYVSDQVSVNLKEIDLTTWEPEHASHHIESYKNSYTHELFDLNQSPWNI<br>TVFLLKNNLLTIFVRFDALILDGRSIAFMLLELFDGQQHDIQTQIEKNEVENSLSVYQADMAYWE<br>RKFSKLSAIPALPWKTPQLHLPTSRYQRNSLVIEKDQFKQLSKIGAKHSLFKNSVIMALILEVLSH<br>WNTEKSLCVAVPTPLPLYAGPFSNSSTFIAVEWKALDQFAEQANRLQTEVLEGLQHLFSFGVDLA<br>RLLFEKVGTAAPVLPVITNGLSWPVLSESHPIQQLDGLTQTPQVAIDIRFSTRNDGALIFDIDYAE<br>AFPPNMIDDFLDALQLAIKQIIGSEIFSDLSNFFSELQNKRPYFKNNESDHSSIPLENNAKQQNQL<br>LDIYLEVIGHTPNKEVDNSTHFTHLGLRPHHLKAVSKRINETYAIQLSPVQLIQCRNIADVEKLLT<br>AH                                                                                                                                                                                                                                                                                                  | 2.4822485 | 0.005282474 | up   |
| A0A836LYR7 | Ankyrin repeat family protein                                      | 8  | 1  | 2  | 1 | 19.1  | MHKSNIIRQONENILIRNAIKKHELITVKKIFSEFPGLLSIDTPFGSWLHVAASSGALEIVKYLITE<br>GLSPNKKGGTFGGNSLNTAVSNGHIDIVEYLLLNVMEDTTEPERNPLFGAIMKGSPLIVEKLISH<br>DIDYKISYTGDMNMDAESFALERGEIEIANYLSLK<br>MQMSVSSILERLGLVSNRAVHIQFSNQLNQQVFLQRIEGEHTLNQGSVAELLCLSTNAHIALK<br>QFIGCQVAVDQVTDTGQFFRTTGIIEASQGGSDGSLTIYNLTKDPTALWHKRRNSRVFMNKS<br>VRDISEILFKEWQEKSPLFASSITLDTSGLT KDYDVRPFVMQSNESDYDFLTRLWRSEGINWLV<br>ESQLFIADPNASIQQVLRIDDDNQYQALERRSIRYQRSSATEQFDITITQVKAERRLQPTSVHVQ<br>RWQADALQEEGSGSVQGTQKHSEHYDNASLNLEDAWHVSPAWMQDLNGEDQATASGNSQI<br>EQLNQHINAYHHLSSKQFTVAGNVRDAQVGYWFEINDHPELDQHDSDADKEFLILSKHYYNQNN<br>LPKELQQQLERLLPQGKLLAAQLDSQNPEQRHFAELNVVRRNIKA VPEYNPLEHRPAHPQRAR<br>VVGLEGESIHVDQWGRIVRFLFRADDDSHDGGAGSNDNDTDSAWVDVLPWAGAGYGARF<br>LPRVGEIVVIDFFDGNIDRPFVVGRIHEAERHPTQFDQKQQLPDTKKLSGIRSEEVDGKGFNQLRF<br>DDTTGQISALQSSHAASQLNLGNLSHPKDKAESDGRGEGFELRTDQWGAIKAGSGLLVSTHKQ<br>DQAQGVHLDASEAKQQIEGGLNNAKALSEVAKNQQTDPDMLNLIQTFLVVKQEDPKKAAEF<br>QSAVMLLASPKSIAVSSNEDIHLSANGQLTQSAGDSINISTQKNIVSHASQKISLFAAQEGARLFA<br>GQKVEIQAQDGLDVIARKGVQITSIEDTVYITSPTEINLTANGSQVKNLNGSGIFPVTGGKLEVK<br>AGQHLMFGGGKVDVVPKLELNITKKYSNKLVDVYEIFPTNKFTDLTMSVKGSDGVVEEHKID<br>KYGRSPRISDAEPKELEVLVGGDVWNYFIKNIGGTDKDDPFYFKFLDYVGKPIVGMICYLLDNSL<br>NIVKKEVTDGNGEVFVYTDYLPIMGVMKFDNTVVKPICYVNHHCNREYIFISPKVKANLALL<br>EEGQKGEYLRAGYRVKEGESLQNIADKYSITTDIEHSLNTGMENIDVNTKLVEGAYIKLPNYINRE<br>EWKNG | 5.7643192 | 0.024189459 | up   |
| A0A837Q8N8 | Type VI secretion system,<br>RhsGE-associated Vgr family<br>subset | 2  | 2  | 4  | 1 | 122.6 | HPETLVKVKDAEDQLGARVGYIELDLNSGKILESFRPEERFPMSTFKVLLCGAVLSRVDAGQE<br>QLGRRIHYSQNDLVEYSPVTEKHLTDGMTVRELCSAAITMSDNTAANLLLTIGGPKELTAFLHN<br>MGDHVTRLDRWEPELNEAIPNDERDTPMPAAMATTLRKLTLGELLTLASRQQLIDWMEADKV<br>AGPLLRSAIPAGWFIADKSGAGERGSRGIIAALGPDGKPSRILVIYTTGNQATMHERNR<br>MELKRVNQDFYVAGQITADDIVKIADQGIKTLICNRPDGEADQPNVIEIEEAAQRHSLKVIYQP<br>VTSGKISDGQVTEFKQLYQNAQKPVLAYCRSGMRAISLWALAEVAPQDVALLVESGNKLGFNL<br>KGLVPRILKRDHEPATIPCYSVVIVGAGAAGISVASSLLCREPHLDIVIIDPADTHYYQPGWMTMVG<br>GGIFKPQVARSASVPSKVKWMKAAVAGFDPQHNQIIEGCPPIQYKALVVCPLKLNWHGI<br>EGLVETLGNKGVTSNYRYDLAPYTWELVQELNGGKAIFTQPPMPIKAGAPQKAMYLSADYW<br>LKQGLKLDISIHFYNTGAVLFGVKEYV PALMQYVEKYGSELHFHNQLVKVDGPARKAWFKV<br>NDENAALVETDFDMLHVPPQQAPDFIRASTLTDEAGVSVNPTLQHTQHANIFALGDVMNA<br>PNAKTA AAAARAQAPIVAVNVIAQLKGEQNFCEYNGYGSCLTVERGKIVLAEFGYGGKLLPSFP<br>KWVIDGQKPSRLAWLLKEQILPPIYWQGMKLGREWMVKPERG                                                                                                                                                                                                                                                                                                                                                                                                                                                                                                            | 0.2476975 | 0.003227445 | down |
| A0A8E4GYA6 | Beta-lactamase                                                     | 72 | 16 | 58 | 1 | 27.5  | HPETLVKVKDAEDQLGARVGYIELDLNSGKILESFRPEERFPMSTFKVLLCGAVLSRVDAGQE<br>QLGRRIHYSQNDLVEYSPVTEKHLTDGMTVRELCSAAITMSDNTAANLLLTIGGPKELTAFLHN<br>MGDHVTRLDRWEPELNEAIPNDERDTPMPAAMATTLRKLTLGELLTLASRQQLIDWMEADKV<br>AGPLLRSAIPAGWFIADKSGAGERGSRGIIAALGPDGKPSRILVIYTTGNQATMHERNR<br>MELKRVNQDFYVAGQITADDIVKIADQGIKTLICNRPDGEADQPNVIEIEEAAQRHSLKVIYQP<br>VTSGKISDGQVTEFKQLYQNAQKPVLAYCRSGMRAISLWALAEVAPQDVALLVESGNKLGFNL<br>KGLVPRILKRDHEPATIPCYSVVIVGAGAAGISVASSLLCREPHLDIVIIDPADTHYYQPGWMTMVG<br>GGIFKPQVARSASVPSKVKWMKAAVAGFDPQHNQIIEGCPPIQYKALVVCPLKLNWHGI<br>EGLVETLGNKGVTSNYRYDLAPYTWELVQELNGGKAIFTQPPMPIKAGAPQKAMYLSADYW<br>LKQGLKLDISIHFYNTGAVLFGVKEYV PALMQYVEKYGSELHFHNQLVKVDGPARKAWFKV<br>NDENAALVETDFDMLHVPPQQAPDFIRASTLTDEAGVSVNPTLQHTQHANIFALGDVMNA<br>PNAKTA AAAARAQAPIVAVNVIAQLKGEQNFCEYNGYGSCLTVERGKIVLAEFGYGGKLLPSFP<br>KWVIDGQKPSRLAWLLKEQILPPIYWQGMKLGREWMVKPERG                                                                                                                                                                                                                                                                                                                                                                                                                                                                                                            | 2.2819141 | 0.009981889 | up   |
| A0A9P2P3T1 | TIGR01244 family phosphatase                                       | 18 | 7  | 9  | 1 | 60.6  | MELKRVNQDFYVAGQITADDIVKIADQGIKTLICNRPDGEADQPNVIEIEEAAQRHSLKVIYQP<br>VTSGKISDGQVTEFKQLYQNAQKPVLAYCRSGMRAISLWALAEVAPQDVALLVESGNKLGFNL<br>KGLVPRILKRDHEPATIPCYSVVIVGAGAAGISVASSLLCREPHLDIVIIDPADTHYYQPGWMTMVG<br>GGIFKPQVARSASVPSKVKWMKAAVAGFDPQHNQIIEGCPPIQYKALVVCPLKLNWHGI<br>EGLVETLGNKGVTSNYRYDLAPYTWELVQELNGGKAIFTQPPMPIKAGAPQKAMYLSADYW<br>LKQGLKLDISIHFYNTGAVLFGVKEYV PALMQYVEKYGSELHFHNQLVKVDGPARKAWFKV<br>NDENAALVETDFDMLHVPPQQAPDFIRASTLTDEAGVSVNPTLQHTQHANIFALGDVMNA<br>PNAKTA AAAARAQAPIVAVNVIAQLKGEQNFCEYNGYGSCLTVERGKIVLAEFGYGGKLLPSFP<br>KWVIDGQKPSRLAWLLKEQILPPIYWQGMKLGREWMVKPERG                                                                                                                                                                                                                                                                                                                                                                                                                                                                                                                                                                                                                                                                                                                                                                                    | 0.4814324 | 0.004751295 | down |

|            |                                                                      |    |    |     |    |      |                                                                                                                                                                                                                                                                                                                                                                                                                                                                                                                                                                                                                                                                                                                                                                                                                                                                                                                                                                                                                                                                                                                                                                                                                                                                                                                                                                                                     |           |             |    |
|------------|----------------------------------------------------------------------|----|----|-----|----|------|-----------------------------------------------------------------------------------------------------------------------------------------------------------------------------------------------------------------------------------------------------------------------------------------------------------------------------------------------------------------------------------------------------------------------------------------------------------------------------------------------------------------------------------------------------------------------------------------------------------------------------------------------------------------------------------------------------------------------------------------------------------------------------------------------------------------------------------------------------------------------------------------------------------------------------------------------------------------------------------------------------------------------------------------------------------------------------------------------------------------------------------------------------------------------------------------------------------------------------------------------------------------------------------------------------------------------------------------------------------------------------------------------------|-----------|-------------|----|
| A0A9P2UE60 | Acetate-CoA ligase                                                   | 41 | 17 | 31  | 1  | 72.2 | MNEIYPVPEEFKKTARTVEADYFKRYQHSIENPDEFWAEQAKIVDWIKPFTQVKNTSFDKDNFKI<br>EWFADGELNVSANCLDRHLKEHPHKPAIIWEGDHPSRHKIVSYKELHDEVCRFANVLKKYIGIG<br>GDRVVLYMPMVTEAAIAMLACARIGAVHCVVFGGFSPDLSASRIEDSQAKLVITADSSLRAGKL<br>LPLKENVDLALALPGTECVENVIVVYRNANPIEMKPGRDLYWHLIIMEVDANCPPEPMKAEDPL<br>FILYTSGSTGKPKGVLHTTGGYL VYVASTFKEVFDLKKQDDVYVCTADVGVITGHSYLIYGPLA<br>NGTTTTLMFEGVPQYPTWARLGHVVDKHKVSI LYTAPTAIRAMMREGDSYVRESNRSSRLLLGS<br>VGEPIPEAWNWYNNVVEGRCPIVDTWQVETGGILIAPLPGATALKPGSATRPLFGIQAIVD<br>GEGNELEGAEEGNLVIKDSWPGQMRTIWGDPDRFIEAYFSTFKNTYFTGDGARRDEDEDGYWIT<br>GRVDDVLNVSGHRLGTAIEIESALVSHEAVAEAAVVGMPHDIKQGICTFVTLQAGVPESEELRK<br>ELISWVRKVLGPVSPDALHWAPALPKTRSGKIMRRILRKIAANELDSLGDSTLAEPAVVDQLI<br>TTVYPDROK<br>MNHSVLSKFLHLHIGDSQLVLSQRLAEWCGHAPELEIDIALANIGLDLLGQARNFLTLAQYDEAK<br>RDEDQLAYFRTEREFLNLLCEQPNQDFQAQTVIRQWLMDHYHLHLFTALAQSSLPELSALAVKS<br>LKEVYHIRFSTSWMERLSLSTDEAHQRVQDGLDNLWRF TAEFLFELSADEKALVAEGVIPDFSN<br>EKEQWNQTIADDELKRFELNVAVNGAYRRGAKQGLHTEHLGYLLAEMQCIQRTYPGMTW<br>MSVIDVGGVEVEGEELDIGAVENWLKNQGVELVGPVVVQYTGGSANWYRKYENTDLILRR<br>PPKGTKAKSAHDMAREYMVQKNLAPYYPVLPKMWALCQDESIGCDFYVMERIEGIIPRAKLP<br>ELGFNEDDVHELVCVNVIDKLIELHQVPYENTPLAELGKGTGYCRQVEGWDKRYEKVRTINVPS<br>FKYVRKWLNDNIPQDSTTCIHNDRWRFNDVILDEHPTEVIGVLDWEMATLGDPLMDLGSALAY<br>WVEPTDNMIFRSTRRQPTHKGMFSRKEVVDY YLQKTGLEPQNWTFYEVFVGFRLAVIAQIQY<br>YRYYHKQTRNPAFKDFWIVIHALHIRALKLIAQQKLQSEFEAQQLQKIQGILRR | 6.6664201 | 0.006090192 | up |
| A0A9P2UEN7 | 1,2-phenylacetyl-CoA<br>epoxidase, subunit C                         | 55 | 13 | 31  | 13 | 28.8 | MNHSVLSKFLHLHIGDSQLVLSQRLAEWCGHAPELEIDIALANIGLDLLGQARNFLTLAQYDEAK<br>RDEDQLAYFRTEREFLNLLCEQPNQDFQAQTVIRQWLMDHYHLHLFTALAQSSLPELSALAVKS<br>LKEVYHIRFSTSWMERLSLSTDEAHQRVQDGLDNLWRF TAEFLFELSADEKALVAEGVIPDFSN<br>EKEQWNQTIADDELKRFELNVAVNGAYRRGAKQGLHTEHLGYLLAEMQCIQRTYPGMTW<br>MSVIDVGGVEVEGEELDIGAVENWLKNQGVELVGPVVVQYTGGSANWYRKYENTDLILRR<br>PPKGTKAKSAHDMAREYMVQKNLAPYYPVLPKMWALCQDESIGCDFYVMERIEGIIPRAKLP<br>ELGFNEDDVHELVCVNVIDKLIELHQVPYENTPLAELGKGTGYCRQVEGWDKRYEKVRTINVPS<br>FKYVRKWLNDNIPQDSTTCIHNDRWRFNDVILDEHPTEVIGVLDWEMATLGDPLMDLGSALAY<br>WVEPTDNMIFRSTRRQPTHKGMFSRKEVVDY YLQKTGLEPQNWTFYEVFVGFRLAVIAQIQY<br>YRYYHKQTRNPAFKDFWIVIHALHIRALKLIAQQKLQSEFEAQQLQKIQGILRR                                                                                                                                                                                                                                                                                                                                                                                                                                                                                                                                                                                                                                                                                                                     | 4.1423264 | 0.00939901  | up |
| A0A9P2XHD2 | Phosphotransferase enzyme<br>family protein                          | 56 | 16 | 38  | 16 | 43.3 | MNHSVLSKFLHLHIGDSQLVLSQRLAEWCGHAPELEIDIALANIGLDLLGQARNFLTLAQYDEAK<br>RDEDQLAYFRTEREFLNLLCEQPNQDFQAQTVIRQWLMDHYHLHLFTALAQSSLPELSALAVKS<br>LKEVYHIRFSTSWMERLSLSTDEAHQRVQDGLDNLWRF TAEFLFELSADEKALVAEGVIPDFSN<br>EKEQWNQTIADDELKRFELNVAVNGAYRRGAKQGLHTEHLGYLLAEMQCIQRTYPGMTW<br>MSVIDVGGVEVEGEELDIGAVENWLKNQGVELVGPVVVQYTGGSANWYRKYENTDLILRR<br>PPKGTKAKSAHDMAREYMVQKNLAPYYPVLPKMWALCQDESIGCDFYVMERIEGIIPRAKLP<br>ELGFNEDDVHELVCVNVIDKLIELHQVPYENTPLAELGKGTGYCRQVEGWDKRYEKVRTINVPS<br>FKYVRKWLNDNIPQDSTTCIHNDRWRFNDVILDEHPTEVIGVLDWEMATLGDPLMDLGSALAY<br>WVEPTDNMIFRSTRRQPTHKGMFSRKEVVDY YLQKTGLEPQNWTFYEVFVGFRLAVIAQIQY<br>YRYYHKQTRNPAFKDFWIVIHALHIRALKLIAQQKLQSEFEAQQLQKIQGILRR                                                                                                                                                                                                                                                                                                                                                                                                                                                                                                                                                                                                                                                                                                                     | 2.3901882 | 9.91E-05    | up |
| A0A9P2XJK2 | DNA gyrase subunit B                                                 | 61 | 40 | 149 | 3  | 92.1 | MSESESQASQTEQTEKAYDSSSIKVLRLGLDAVRKRPGMYIGDTDDGTGLHHMVFEVVDNAIDE<br>ALAGHCDEIIVTIHEDESVSVDNGRGIPTDIHPPEEGVSAAEVILTILHAGGKFDNDSYKVSGLLH<br>GVGVSVVNALSSKLLHTIYRAGQIHEQEYHHGDPQYPLRVIGETDNTGTTVRFWPSAETFSQTIF<br>NVEILARRLRELSFLNAGVRIVLRDERINLEHVYDYEGGLESEFVKYINEGKNHLNEIFHFTADADN<br>GIAVEVALQWNSYQENVRCFTNNIPQKDGGTHLAGFRAALTRGLNQYLENENILKKEKVNT<br>GDDAREGLTAIISVKVPDPKFSSTKEKLVSEVKAPEVQAMNKEFSA YLLENPQAAKSIAGKIID<br>AARARDAARKAREMTRRKSALDIAGLPGKLADCQEKDPAELSELYLVEGDSAGGSAKQGRNRK<br>MQAILPLKGIKILNVERARFDKMISSQDVGTLTALGCGIGREEYNPDKLRYHKIIMTADVDGS<br>HIRTLLTFFFRQMPPELVERGHYIAQPPPLYKLLKKGKQEYIKDNDNALETY LISNAIDELALHISAD<br>APAITGEALAKVIQDYQVSQKSLQRLTLRYPASLLDALLEVDFAKADQNHDQAYVQQWADQVR<br>EAVQRLQPSLRPEITLETTERENASQGEKSAHYWPRVTVYVHNLPHAYLLDAGLLNSAEYARLLK<br>NSKSWFKLIEDGAYLQKGDRIQVANFHQVWQHILQDSRRGMMIQRKGLGEMNAEQWETT<br>MDPENRMLQVTTIDDAIEADRMFSCMLMGDDVEPRRAFIEENALNADIDA                                                                                                                                                                                                                                                                                                                                                                                                                                                                                                | 2.311472  | 0.006567827 | up |
| A0A9P2XK89 | Bacterial transferase<br>hexapeptide family protein                  | 30 | 4  | 9   | 4  | 20.9 | MKKKLRKLIYFILPCIRLFLNFFKRKYLEGRFFSKLSGYYVAVRSI WVKNILRLSKPTPFPTALT<br>CSISNPYNIHFHPDDLNNFQSPGTYFQNFSAHIYIGKGSYIAPNVGIITSNHDLADLESHTEGKDVV<br>IGDKCWIGMNSVILPGVVLGNGTIVAAGAVVTKSFKQGNIVIAGVPAKIIKEIK<br>MQQWLRSKFLFLPIWLVFLSWIRPLSVPDEGRYGDISRTMFESGDWLTPIRIDGLPFMHKPLLL<br>HWLSSFMELFGVHVWVLRVLPVLAGTLMVLVGLFLVKKHISEVAQLTVIILATNLLFFGSSQ<br>YINHDLASWITISVLCFVDFTISAQKSLFLGYIAGAAFLSKGLIGLIPGMILLPWLIYTKQWK<br>KIPSLNPLAILLFLIVSPWLYLVQSKYPQLHYFFIDQQFNRFSSKEFNKQPWCFYLILFVFSFL<br>PWLFAFRFTSIKTIKDYKSCSLLALFVWVFSVTVFVSIIPSKLAGYILPAVPLAIFVALVMNKV<br>LESSNKTRLQTWGIPVFTILVIGVSAATPHFIRAHQPFQNAQIIFYLIGALLIVLPLVLVGLYKKQ<br>KLYLTYIFISLIVLCSAVPFAVRILDTKNNVGQTDFAEYIAPSTKIVFYNYFYDVPFLKQKQV<br>YIVNQWDTVHSDSASLEIKDGLLFEPQLKLYLWSEQQLQDALMQKQDLIVISQPHNFATKDPVSV<br>KTLHYRNYDVFIHPSK                                                                                                                                                                                                                                                                                                                                                                                                                                                                                                                                                                                                              | 2.3572579 | 2.78E-06    | up |
| A0A9P3CXB6 | Dolichyl-phosphate-mannose-<br>mannosyltransferase family<br>protein | 13 | 5  | 10  | 5  | 63.3 | MQQWLRSKFLFLPIWLVFLSWIRPLSVPDEGRYGDISRTMFESGDWLTPIRIDGLPFMHKPLLL<br>HWLSSFMELFGVHVWVLRVLPVLAGTLMVLVGLFLVKKHISEVAQLTVIILATNLLFFGSSQ<br>YINHDLASWITISVLCFVDFTISAQKSLFLGYIAGAAFLSKGLIGLIPGMILLPWLIYTKQWK<br>KIPSLNPLAILLFLIVSPWLYLVQSKYPQLHYFFIDQQFNRFSSKEFNKQPWCFYLILFVFSFL<br>PWLFAFRFTSIKTIKDYKSCSLLALFVWVFSVTVFVSIIPSKLAGYILPAVPLAIFVALVMNKV<br>LESSNKTRLQTWGIPVFTILVIGVSAATPHFIRAHQPFQNAQIIFYLIGALLIVLPLVLVGLYKKQ<br>KLYLTYIFISLIVLCSAVPFAVRILDTKNNVGQTDFAEYIAPSTKIVFYNYFYDVPFLKQKQV<br>YIVNQWDTVHSDSASLEIKDGLLFEPQLKLYLWSEQQLQDALMQKQDLIVISQPHNFATKDPVSV<br>KTLHYRNYDVFIHPSK                                                                                                                                                                                                                                                                                                                                                                                                                                                                                                                                                                                                                                                                                                                                                                                                                     | 3.9504132 | 1.66E-07    | up |
| A0A9P3CXM7 | Nucleotide sugar<br>dehydrogenase family protein                     | 64 | 20 | 77  | 16 | 47.1 | MQLADLRIAIIGLGYVGLPLAVEFGKKGPVIGFDINQNRIDELKSGKDHTLEVSPPELQKAEQLSF<br>SANLDDLKTSNFFIVTVPTPDQVNRPDLTPLKKASETVQGALKKGDIVVYESTVYPGATEEVC<br>PILEKVSGLKFNQDFFAGYSPERINPGDKVNTLTKIKKITSGSTPEVANTVDAVYASITAGTHKA<br>SSIKVAEAAKVIENTQRDLNIALVNELSVIFDRIGIDTLDVLEAAGSKWNFLPFRPGLVGGHCIGV<br>DPYLYLTHKAEVGYHPQVILAGRRINDNMARYVARNTIKMLQNGIDVPRSKVGLVGTFKEN<br>CPDIRNSKVADLIKELEFWGAQVVVADPWADAEVKEHYGVELGTVNAQNPVDSLIVAVGHSE<br>FRSLASSELRSYVKAEPVLADVKSFLDRTQMSDVGFTVFRL                                                                                                                                                                                                                                                                                                                                                                                                                                                                                                                                                                                                                                                                                                                                                                                                                                                                                                                                    | 5.9515789 | 0.000445966 | up |
| A0A9P3CY71 | Bacterial transferase<br>hexapeptide family protein                  | 41 | 5  | 7   | 5  | 21.9 | MPCYSIDGVIPVSPDAFVHPTAVLIGDVIIIEAGVYVGPFAASLRADFGRIHIKQANIQDSCVTHG<br>FPQSVTLVEEMGHIGHGTTLHGCRIGKNNVVGMSNVILDYAEIGENTHIGANSLVKTKDIIPANVL<br>AMGSPAKVARDLSEQEKWKTRGTQEQYIELAQRCLNSMQEVQPLTSELDDRLTYKDFSSSNYQI<br>KQDSV                                                                                                                                                                                                                                                                                                                                                                                                                                                                                                                                                                                                                                                                                                                                                                                                                                                                                                                                                                                                                                                                                                                                                                               | 2.397699  | 0.002278304 | up |

|            |                                                                |    |    |     |    |      |                                                                                                                                                                                                                                                                                                                                                                                                                                                                                                                                                                                                                                                                                                                                  |           |             |      |
|------------|----------------------------------------------------------------|----|----|-----|----|------|----------------------------------------------------------------------------------------------------------------------------------------------------------------------------------------------------------------------------------------------------------------------------------------------------------------------------------------------------------------------------------------------------------------------------------------------------------------------------------------------------------------------------------------------------------------------------------------------------------------------------------------------------------------------------------------------------------------------------------|-----------|-------------|------|
| A0A9Q1N7W9 | Uncharacterized protein                                        | 55 | 10 | 18  | 10 | 23.8 | MNNEYFKLYTDSQFLSPYAFTVFVGLHEKQIPFEIAAIDLGGQQGFETSFVEKSLTAKVPVLEHN<br>DFALSESSAILEYLEELYPDTAIYPKDIQARARARQIQAWLRSDDLVALRTERPTDVIFIQPKSTPLS<br>EKGKAAEKLFFVAEKLASDAEFLFGSWSIVDAELALMLQRLIQNGDAVSRERLKNYALQQWQ<br>RPSVQKWLALRHK                                                                                                                                                                                                                                                                                                                                                                                                                                                                                                     | 2.7425208 | 0.015721617 | up   |
| A0A9Q1NA93 | Uncharacterized protein                                        | 77 | 14 | 44  | 1  | 29.0 | MNISDNTPQQQLSSQFYRQYSANALLPELDWQSIFPHSKLSEAHIKALNTIYQCAVPLALNVFH<br>DLNFDVFAAAYHPQGLGLFDKLAQQEENFLKVLTAESENLDHETRHQIWSMMLRGGAVLVFK<br>AWLGHVKLGENQLDMTQFDELSDLLFIKTPPHQLAERLHVDEKAKLDHFILMYGNDIFLDRFNS<br>LETAALFVDLGVYDAAFLSLRDDCVAEYLKSKGYVTQEIQIDDLQCALNPLYCDSLTPKQDCLA<br>MIGAIIFYWKERKAPPYDQPAPLESYPKVAVLIPCFNEGDAEETITHALKLDYPHFEVIAINDGS<br>SDNTGEVLDRLAEQHEKLRVHQAQNQGKAMGLQAGSLMTDAEFLIGIDGDALLDPHAACKWM<br>VRHFLQNPTVAAVTGNPRIRTRSTLLGRIQVGEFSSIVGMKRAQRTFGRFLT VSGVITAFRKS AV<br>HQVDY WSPNMLTEDIDITWKLQRAGWDIRFEPNALVWILMPETLNGLWKQLRWRWAMGGAQV<br>LIKIDVFTKPKLNFLWPLMFELCLTLVWSYMLAMALLWLWHFILPVPALAVVSSPFLPYGSGI<br>LLGATCLIQFALS KWMDSRYEPHLGKNYFWMIWYPLVFWLITISATVAFPKVLRRGDEKRARW<br>VSPDRGIRG                  | 2.2016594 | 0.024916312 | up   |
| A0A9Q1RV14 | Poly-beta-1,6 N-acetyl-D-<br>glucosamine synthase<br>PgaC/IcaA | 4  | 2  | 4   | 1  | 44.7 | MEDKNNWSLYEVFVRSKQGLSHRHVGSRLAPDDEIALQHARDVYTRRNEGISIWVVRSELIKSS<br>QPDEKAEFFDPSLDKVVYRHPTFYHIPDGIEHM                                                                                                                                                                                                                                                                                                                                                                                                                                                                                                                                                                                                                            | 2.4326443 | 0.039103683 | up   |
| A0A9Q1S0P9 | Phenylacetyl-CoA epoxidase,<br>subunit B                       | 45 | 4  | 12  | 4  | 11.3 | MITRFASPLLNLTGLALAGLSGMVLANPPKIDASTLTVIGYHEITDTKNALIPQYAVTTQQFTEH<br>VDWLQKNGFHFITVDQLIRAHQGKAALPTKPVLLTVDDGYQSFYQNAYPVIAKAKKIPVVLAVV<br>GSWLEPKAGQKVDVFSGEEIPRDKILSWGELKEMQDSGFVEIASHSYHLHRGITGNPQGNSEPAAT<br>TRFYDVKTCTYENDSQYQARIYNDLKKNNQLLKEHGIRSPRIMVWPYGRYNMQTVQIAKKG<br>MPITITLDDGADHAKQSLQNSRILVEGGMSTNDLAQEIKNRELNTDNNRPQKIMHIDLDIYD<br>PDPQQQERNLGHLLDRINAMGVNTVYLQAFSDPDANGSADMVYFPNRHIPMRADLFNRVAWQI<br>QTRTPVSRITYAWMPLLAWE LPKTDPVSKDLV VTEQAKAGEHLNMGYIRLSPFSPEARQTIREIYQ<br>DLAKSASFNGILFHDDVTLSDYEDASPDALKAYAKQGLPTDLAKIRENDQDLQKWTAYTKYL<br>DDFAMQLVEDVRQYEPFLLTARNLYAQV ALKPYAENWYSQSLEESLRRYDFTAIMAMPYMEQ<br>VDNADQFYKDMIDRVKKYPNGIKKTVFELQATNWRNNEKVPSTEMAAITHSLYQQGAMHVAY<br>YPDDPIKDHPDVNMVHKAFAEKSSRLVP | 3.8485288 | 0.000984997 | up   |
| A0A9Q1W4V0 | Poly-beta-1,6-N-acetyl-D-<br>glucosamine N-deacetylase<br>PgaB | 54 | 27 | 96  | 27 | 75.7 | MSFYQHETAIVDNGAQIGEDSRVWHFVHVCGGAKIGKGVSLGQNVFVGNRVVIGDHCKVQNN<br>VSVYDNTVLEEGVFCGSPMVFNTVYNPRSLIERKDQYRDTLVKKGATLGANCTIVCGVTIGAYA<br>FVGAGAVVNKDVPAAYALMVGPVPAKQIGWSEFGEQLDLPLQGGQAQICSHTGAVYQLHGTTL<br>TKQG                                                                                                                                                                                                                                                                                                                                                                                                                                                                                                                    | 3.6960134 | 0.002657392 | up   |
| A0A9Q2E0D7 | Trimeric LpxA-like<br>superfamily                              | 35 | 4  | 13  | 4  | 20.5 | MFFKQFFEKESSTYTYMLGCEETREAVLIDPVASDIEIYAKELEQHQFTLIYLDTHVHADHITAA<br>NLLRERFHCXSVLHRNSEVSCGDILITDGCMLKVGDLSEIARYTPGHTNACTSYLVGNMIFTGDA<br>LLIDGCGRTDFQQGNAGTLYDSIHKQLFSLPDETIVYPGHDYKGRLSSTIGYERLNSRLGQNR<br>REDFIKLMNNLNLPPYKQIDKALPANQACGSISQL                                                                                                                                                                                                                                                                                                                                                                                                                                                                                 | 4.1537782 | 0.000199345 | up   |
| A0A9Q4SH60 | Metallo-beta-lactamase                                         | 29 | 4  | 6   | 4  | 26.0 | MKRLVDIVISLIALTVLSPIFLIVAYKVRKNLGSPIFFYQERPGKDGKLFKMIKFRSMKDAFDAQG<br>NPLPDEARITPFGQKLRSTSLDEMPQLINVLKGDMSVVGPRPMLKDFVALYSPEQARRLEVRPG<br>MTGLAQVSGRNELDYEEFKCDVWYVDNHNWVDFKIMFKTVKVMMLRREGINAPGHVGPSLF<br>KGNDTQENVDSVVK                                                                                                                                                                                                                                                                                                                                                                                                                                                                                                        | 0.4674651 | 0.003166142 | down |
| A0A9Q4XE51 | Bacterial sugar transferase                                    | 47 | 7  | 10  | 6  | 23.4 | MKIKYLILALLPFSLMACQTVSNTQAPIVSEQQNLATTLSEYTWTYQNVKASKPLILNFNADGK<br>LAINTCNGGGTGWKVEGNQLITSPLASTMMACQDDLMKQEQLSNSIFSEAKLPIEISNNGLVI<br>LSVTDKAGQKHIFQGEKATNTQALTDYSWSYQPEENTKPIVLFNFTNDRLSIDTGCNRQGTWK<br>VENNTIVTTDVMSTMMACEPALMKQE QFSSSLFQKRAIPFELNNTNVDQPTLTVTDAQGQKYTF<br>TGKMTPEAKYQSEGKTVFLEVAPETKCTGVAPQTCLQVREVKYDDKGVKTYADKNWSLYYG<br>QIEGFEHNPQRVILRVKRFEVKNPAADQSSQADVLDMVVEQELVK                                                                                                                                                                                                                                                                                                                                    | 2.8668673 | 0.000856601 | up   |
| A0A9Q6DAC3 | Domain of unknown function<br>DUF306, Meta/HslJ                | 65 | 17 | 164 | 2  | 40.7 | MKIKYLILALLPFSLMACQTVSNTQAPIVSEQQNLATTLSEYTWTYQNVKASKPLILNFNADGK<br>LAINTCNGGGTGWKVEGNQLITSPLASTMMACQDDLMKQEQLSNSIFSEAKLPIEISNNGLVI<br>LSVTDKAGQKHIFQGEKATNTQALTDYSWSYQPEENTKPIVLFNFTNDRLSIDTGCNRQGTWK<br>VENNTIVTTDVMSTMMACEPALMKQE QFSSSLFQKRAIPFELNNTNVDQPTLTVTDAQGQKYTF<br>TGKMTPEAKYQSEGKTVFLEVAPETKCTGVAPQTCLQVREVKYDDKGVKTYADKNWSLYYG<br>QIEGFEHNPQRVILRVKRFEVKNPAADQSSQADVLDMVVEQELVK                                                                                                                                                                                                                                                                                                                                    | 0.3685637 | 0.00855052  | down |

|            |                                                       |    |    |     |   |       |                                                                                                                                                                                                                                                                                                                                                                                                                                                                                                                                                                                                                                                                                                                                                                                                                                                                                                                                                                                                                                                                                                                                                                                                                                                                                                                                                                                                                                              |           |             |    |
|------------|-------------------------------------------------------|----|----|-----|---|-------|----------------------------------------------------------------------------------------------------------------------------------------------------------------------------------------------------------------------------------------------------------------------------------------------------------------------------------------------------------------------------------------------------------------------------------------------------------------------------------------------------------------------------------------------------------------------------------------------------------------------------------------------------------------------------------------------------------------------------------------------------------------------------------------------------------------------------------------------------------------------------------------------------------------------------------------------------------------------------------------------------------------------------------------------------------------------------------------------------------------------------------------------------------------------------------------------------------------------------------------------------------------------------------------------------------------------------------------------------------------------------------------------------------------------------------------------|-----------|-------------|----|
| A0A9Q6DWC7 | ANL, N-terminal domain                                | 18 | 14 | 19  | 1 | 148.0 | MNQFVTNTKNVIRGKYHPEFLQNEVLADIFAHTAQTLPDKTALIEADKTLSTYSGELYQQALIMAO<br>HLALKGVKPGHIVGLWLPRIEELKLAQLAICLSGAAWLPFDMADRIA VCLEDAEAVGMIT<br>DEWYEH LAEVPQTKWNTNTELOKPLSESVSLAKTTPDQPAYIITSGSTGKLGKIVITQKNICHFLR<br>SENSILGIQEQDKVYQGFVAFDMSFEIWLWLVGATLWIAPKSLVSDPERLCQTLKQEQITVLH<br>AVPTLLALFPEDVPNLRIINLGGEMCPDSL VDRWALPHHQMFNTYGTETTVSASLELLERKGPV<br>TIGKPLPNYGMLVINSERELLEQGETGELCIFGPSVAQGYLGRPDLTADKFIENPWAMSVEEELL<br>YRTGDLAKIDIEFGQVHCLGRADDQVKIRGFRVELGEIEAALCDIDIGITAAVILRPEDGIDQLIAFI<br>APEIDAKQAIEIKELRHNLSQLRPPYMPNRFIEIEVPRLLSGKIDRKALKARPLTSVVDRESSEQ<br>PQNPAAEILFEILNRLFPNMPKLDSDFFDDLGGHSLAAVLSINLREHAEYSHLTIQNLYQARRV<br>AIAALMLEQEPTLFDSSQIGQDNPRNQTYKWLCGIAQLVTIPVLISINILQWLAPFFTYHYFTGGT<br>RDSIPYAIALSLLVYVSVIMSSVLSITVKRLLMLGIGAGRYPLWGLTYFRWWLADRISNISPVYL<br>LSGSTLLNLYLKALGAKIGHDVTISSVHIRMPSLLTIEDGVSIGSQVNLNAKVEHGHLVLSIHL<br>KQDSYVGSYAVLEENTVLEKQAHVNALTSIEYDTVVPEGEIWDGTPAQKIGHIDEQAKLPERPK<br>LSFIRKIAEYGYGVSALIIACLFFIIPPSFLLVDWLDVNVFNINPNHLQALYFILAI PASAMM<br>MMITAVISSGLRKIALPRLEIGTYAVHGSTYYRKWFAAQILETSLQTLHGLFATYAPTWFRMLG<br>AKVGNTEISTATGVIPEMLTLGEEFIADAVMLGDEEIKGGWMSLKATKIGNRSFVGN SAYIAD<br>GTVLPDNLIGVQSKTPDNREMYDGTWFGSPALLLPAREAAEKYPDHLTFKPSIKRRLMRGFI<br>EGLRIVLPAALAIGVGMIVLDVIDVINNYNIETGLVALTLAGLLYGVGCFLVALLKWLIGRYQ<br>PRSA PMWTFMFWLSEGITSLYESAIPNFLNYLRGTPMLPFFLRILGVRIGKDVYMDTADITFED<br>CVSIGDRAEFNSFGPQTHLFEDRIMKIGQVNVGNDVVNTRSHLYNANVSNHAVLGPLTLVMK<br>GENIPAKSAWIGSPAVPVVHK | 3.635188  | 1.10E-05    | up |
| A0A9Q7DS60 | Aldehyde dehydrogenase domain                         | 56 | 29 | 123 | 3 | 74.2  | MPHLASVYVGTWHSDEELRTVYHAITGEAIYAVSSHGVD MKRVVQYAKQNGSELANWTFHQ<br>RANALKQIAQHLLERKEDFYKLAYATGATR KDAWIDIEGGIQLTFAYSSLRRELNDEKIITEDS<br>WQLSKNGTFGAKHILSPKAGVAVHINAFNFPWGMLEKIAPTLLAGVPCIVK PATDGAQLTQAV<br>VKAIEETHVLPK GALQLICGQTYDLLEQLGPDQCVTFTGSAYTGQKLRNHPHLNKYSIPFSMEAD<br>SVNSAILSPEANEETVDLFVREVFREMTTKAGQKCTAIRRAFVPENLLATVQEKLAKLAKVVV<br>GDPQKEETT MGALASIKQKHDAEVAELSKDAKIVFGGNDSTFNADHPEKGAFFAPTLLVCE<br>QPLQATNVHTTEAFGPVCTLMYPQNI EELADLVSRGEGSLVASVVKNNDENIEQIIQIAPWHGR<br>VHVLD AESAKESTGHGSPLPHLVHGGPGRAGGGEELGGIRAVKHYMQRTAIQGSNLSLTQITHS<br>WTAGSKVNEDRVHPFKKSFDELVIGERLLTARRTVTEADIVNFACLSGDYFYAHTDKIAAESFF<br>GERVAHG YFIVSAAA GLFVDAQAQGPVIANYGMDNLR FVEPVKIGDSIQVELTCKQKTPKPKQDA<br>SQPAHG VVVWDIKVKNQRGELVATYDILTLVAREA                                                                                                                                                                                                                                                                                                                                                                                                                                                                                                                                                                                                                                                                                             | 3.511298  | 0.000449417 | up |
| A0A9Q7I520 | Uncharacterized protein                               | 45 | 4  | 11  | 4 | 8.9   | MASTAAERKAKQRQEMLKKGFTRKDLWLSKESLEVIEKFKSEHKLSSNDEAINLLKTIVVIEKF<br>KSEHKFNTIDE                                                                                                                                                                                                                                                                                                                                                                                                                                                                                                                                                                                                                                                                                                                                                                                                                                                                                                                                                                                                                                                                                                                                                                                                                                                                                                                                                              | 3.4312351 | 0.008868339 | up |
| A0A9Q7ZZR4 | Domain of unknown function DUF4468 with TBP-like fold | 51 | 9  | 22  | 8 | 19.4  | MKKILLAGFLGLAGCATTQQPSEPVKFEKVYQIDGLKQGGIYD GARQWFATAFRSANAVIQ<br>YEDKTTGSHIGKGNMYPYRCSGFADCMVT TAGDRVDFTVRVDTKDGMKMSYSDNLT HYPKPAQV<br>ISGVRYNETNRPITEDYPSAKIIMDELNKSSDQMAEKIKTQQKINADW                                                                                                                                                                                                                                                                                                                                                                                                                                                                                                                                                                                                                                                                                                                                                                                                                                                                                                                                                                                                                                                                                                                                                                                                                                                     | 4.9651379 | 9.75E-06    | up |
| B0V8Q7     | SLC26A/SulP transporter                               | 6  | 3  | 5   | 3 | 79.9  | MVVFM PALELKNRFHVNDLLSGVVVFLVALPCLCLGIALASGAPIISGHIAGIVGGIIVGLLSGSHISV<br>SGPAAGLTAVILVQLDQLGGNYAAFLLCIVFAGILQILFGVFKL GFFANFIPNNVILGLLAIGAILI<br>VTQLPYLFLGTD FSWKEVWTATPDTFIQKFDAGAALIGLLSFLILAWDSSPLKKLALPSALIAVV<br>LAAVFNVLISIGSSWAVQSNLIQLPNILQAPEEVLVFPDFSYLAEPLIYTGAITLAIVASLETLLN<br>LEAADKLD PQRSSPPNRELWAQGAGNIVSGLIGGMPVTSVIVRSSVNANTGARSKCSTIHHGVL<br>LLLAILFFVPLMNMIPLSALAAILIVTGFKLTHPKLFKQLYKQGWRFPIITLVAILLTDLLTGIL<br>VGLFTSSAFILYGNFNKGVRVYKEKHLHGIVTRIELPSQVTFLNRSALISALEHIHKDQQLIIDATQ<br>CDSIDPDYQVIQDYQNETAVKRQVDLKLIGFKQH YEEVDDAVLDIYISTRDLQRKLSPPQVITLL<br>KEGNERFVKNERLQRDIYRQIRVT ADEGQHPIAAVLGCMDSRAPTEMIFDVGIGDLFSLRIAGNIA<br>GQKVLGSLEFACQAKGSKVILVLGHTDCGAVTSACQLRLQKQISDVKEMPHIQYV LGPLMHS<br>VESVYDIMQPRELNKTFVNQVTAMNVHYNIQYIINNSTVLKDLLDRGEIAIVGAIYDVKTGHVEF<br>LDA                                                                                                                                                                                                                                                                                                                                                                                                                                                                                                                                                                                                                                      | 2.3762185 | 0.003365344 | up |

|        |                                                |    |    |     |    |      |                                                                                                                                                                                                                                                                                                                                                                                                                                                                                                                                                                                                                                                                                                                |           |             |      |
|--------|------------------------------------------------|----|----|-----|----|------|----------------------------------------------------------------------------------------------------------------------------------------------------------------------------------------------------------------------------------------------------------------------------------------------------------------------------------------------------------------------------------------------------------------------------------------------------------------------------------------------------------------------------------------------------------------------------------------------------------------------------------------------------------------------------------------------------------------|-----------|-------------|------|
| B0VNB8 | Acetyl-coenzyme A synthetase                   | 37 | 17 | 30  | 1  | 72.1 | MNEIYPVPEEFKKTARTVEADYFKRYQHSIENPDEFWAEQAKIVDWIKPFTQVKNTSFDKDNFKI<br>EWFADGELNVSANCLDRHLKEHPHKPAIIWEGDHPSRHKIVSYKELHDEVCRFANVLKKYGIGK<br>GDRVVLYMPMVTEAAIAMLACARIGAVHCVVFGGFSPDLSASRIEDSQAKLVITADSSLRAGKL<br>LPLKENVDLALALPGTECVENVIVVYRNANPIEMKLRDLWYHLIIMEVDANCPPEPMKAEDPL<br>FELYTSGSTGKPKGVLTHTGGYL VYVASTFKEVFDLQKDDVYVCTADVGVITGHSYLIYGPLA<br>NGTTTTLMFEGVPQYPTWARLGHVVDKHKVSIYLTAPTAIMMMREGDSYVRESNRSSRLRLGS<br>VGEPIPEAWNWYNNVDEGRECPVDTWWQVETGGILIAPLPGATALKPGSATRPLFGIQPAIVD<br>GEGNELEGAEEGNLVIKDSWPGMRTIWGDPDRFIEAYFSTFKNTYFTGDGARREDEDYGCWIT<br>GRVDDVLNVSGHRLGTAIEIESALVSHEAVAEAAVVGMPHDIKQGICTFVTLQAGVPESEELRK<br>ELISWVRKVLGPVAPDALHWAPALPKTRSGKIMRRILRKIAANELDSLGDSTLAEPAVVDQLI<br>ATVYPPDRQK | 2.1841252 | 0.0030777   | up   |
| B0VNR0 | Arc-like DNA binding domain-containing protein | 27 | 3  | 5   | 3  | 11.7 | MSKNGGHLTVQYNLRWSEELRDKIADEAKKNTSRMNEIARLEHSFRSESASKPFLSFDKDTSH<br>LVIGDAEERKRLAQIAAKAVFDALGQSLDQDDDEKKAP                                                                                                                                                                                                                                                                                                                                                                                                                                                                                                                                                                                                      | 2.0431226 | 5.62E-05    | up   |
| D0C6V6 | Muconate cycloisomerase 1                      | 44 | 9  | 14  | 1  | 40.2 | MYRTIETILVDIPTIRPHQLSVTTMRTQTLVVKITTTDGVGWGEATTIGGLNYGEESPEVSKAN<br>IDTYFAPLLASVKDLNVAQTLKLRKNINGNRFAKCAIQTALLDIQAKRLSVPLSEVLGGRLRDSL<br>PVLWTLASGDTEKDIAEARKMIELKRHNTFKLKIGSRPLQHDVDHVIAIKKALGADVSVRVDVN<br>RAWSELECIHQQLQDGGIDLEIQPCAIONTEALARLTQRFDVAIMADEALTGPDSAYRIAKNH<br>GADVFAVKIEQSGGLIEACEVGIAGLAGIDLYGGTMLEGPVGSIASAHVFATFETLAFGTGTEFGP<br>LLTTEILKEPLRYENFELHLPTAPGLGIEIDEDKIEKLR                                                                                                                                                                                                                                                                                                                  | 2.7581104 | 0.000125252 | up   |
| G1CBP8 | histidine kinase PmrB                          | 32 | 10 | 23  | 10 | 50.7 | MHYSLKKRLIWGTSIFSILGILFSAKYKVALQEVDEILDTQMKYLAERTAETHPLKTVSSKDFDH<br>KTYHEEDLFDIWAYKDAQHLSHHLHLLVPPVEQAGFYSHKTAQGVIRTYVPLPKDYQIQVSSQ<br>ERVREAFAWELAGSMFIPYLIILPFAIFALAAIIRRLGPKPIDDFKNELKERDSEELTPIEVHDYPQEL<br>LPTIDEMNRLFERISKAQNEQKQFIADAAHELRTPVIALNLQTKILLSQFPEHESLQNLKGLARIQ<br>HLVTQLLALAKQDVTLMSVPEPTGYFQLNDVALNCVEQLVNLAMQKEIDLGFVRNEPIEMHSIEP<br>TVHSIIFNLIDNAIKYTPHQGVINISVYTDPDHYACIQIEDSGAGIDPENYDKVLKRFYRVHHHLE<br>VGSGLGLSIVDRATQRLGGTTLTKDLSLELGGLSVLVVKLPKVLHLHETRA                                                                                                                                                                                                                          | 3.8550336 | 5.55E-07    | up   |
| H6UQA3 | Transposition protein C                        | 55 | 13 | 31  | 13 | 35.0 | MEKYEHLAEHVLEIMQLSDSERIETLFTDRWIGYKKAITMNTLTDILNRPKRLRPECLLIVGDSN<br>MGKTTIIHEFARQYTKTVSDADMLLSVTKPVLPLAPAKANVKELYNILNHFFVPRASDPEA<br>KLRNQAVHLMRKYETKMLIIDEIHNCLTGSAKLLPEVMNTLNKLSNELSNLVGVGTREAITILH<br>TDPQYASRFDVVNLPKWELNQDFLRLLVSYVRLPLKQSNLASKEIATLIFEVSGGNLGDNLRL<br>LVECAKEAILQGDEEITYDIVHKFKWLKPTTEGLRNIRNINLSLS                                                                                                                                                                                                                                                                                                                                                                                     | 2.4517581 | 0.021356976 | up   |
| H6VX66 | Zeta toxin                                     | 63 | 25 | 228 | 25 | 56.3 | MTQKNELDTKYAVIVAGGNAGKSTLIDNVIIPKFNSLNLDFINADVVQLQHFHFDNTNPT<br>HAREAQKWAEAERQKHLDEGRSFIATVFSHPKVDLIKEAKSKGFYVVLVYHIIHLENSDIALDRI<br>KDRVRKGGHDVDEDKVKARYERVLPLVAEATQYADLTFVLDNSVRDRPHQQVFKLEYGKITAI<br>DNNVPDWAIKAYEKQLTDYLGLDQATKISNTNEDLTMSNTKEKLGFEYNARLLANDIQPOHRE<br>TVVANYRKNFVEHVANSAAVAGNSHKLDDVASLINGTTVGGHVSVDKQRQVNLIDASNELVN<br>MVRNGNFALNKSTYLVKNGIVADRESIEAGVLRGEGVEQSFTPDVGIRHFRTHRPMKTEEDAPA<br>LNKFMQEGFDHINSLKNPLEKGIATFLYGSLNQFTFEGERKTAHLMMMNGVLSMAGLDAISIPAD<br>KAIDFRQKMVRFYESKNADEVMEFLADLHPALNNTKKLDAEKEKSENDFGRSFQ                                                                                                                                                                   | 3.8847758 | 0.020245792 | up   |
| N0A436 | L-lactate permease                             | 13 | 6  | 10  | 1  | 62.3 | MFKILRYKNSPRHFKEMTMLNMWQQLYDPLNNIWLSAVALIPIIFFLALAVFRLKGSIAGTGT<br>VIIALLIALFFYQMPGQMAFASHIYGGFFYGLWPISWIIIGAVFLYKISVKTGQFEVIRSSILSITEDQRL<br>QMLLVGFAGFTFLEGAAGFGAPVAITAALLVGLGFKPLYAAGLCLIVNTAPVAFGAMGPIIVAG<br>QVSGVDTEISQMVGRQLPFLTIIVLFWIMAIMDGVWGRVKTWPAVLVGGGAFIAIAYLTSNFI<br>GPELPDITAAIASLVSLTLLFRVWPKKHIFRFEPEAGQTLAQPTTVQRYSIGKIAKAWSPFAILTV<br>MVTIWSVKPFKALFAKDGALEHWIFKLEVPYLHLKVEKMPPIVSEMPPYEAIYKFDWFSATGTA<br>IFIAAITVIFLKMKASEAVTTFGETLNELKTPYISIGMVLAFAFIANYSGLSATLALALSHTGHAF<br>FFSPFLGWLVFLTGSDTSSNALFSAQATTAAQQIGIPEVLLVAANTS GGVTGKMISPQSI AIAICA<br>AVGLVGKESDLFRFTVKHSIIFTVFVGHITVQAYLVPWMIP                                                                                         | 0.1798631 | 0.047128004 | down |
| Q4A208 | Putative outer membrane protein                | 92 | 16 | 63  | 16 | 25.6 | YQAEVGGSYNYLDPDNGSSVSKFGVDGTYFFNPVQTRNAPLAEAAFLNRSNVNAHVNYGDN<br>SGTKDTQYGVGVEYFVFNPNDFYLSGDVGRNEREIDNTNIDSKVTTYAAEVGYLPAPGLLLALGV<br>KGYDEKDGKDGADPTVRAKYVTQVGGQHDVNLEAYGAFGDLDEYKVRGDYIDKTLSLGVDY<br>YNNDLTDKDEFINAKKFLNQVSVVEGRVGFVGDNDNTYGVRAAYRF                                                                                                                                                                                                                                                                                                                                                                                                                                                          | 0.4239015 | 0.000421047 | down |
| S3TFV1 | Glycosyltransferase                            | 9  | 2  | 2   | 2  | 36.5 | MNIKPFLSCVVPAYNEAENLKTIPALANSKQONLSYEIIVVDDGSKDDTIPILQTMIEDYPLVV<br>LELSRNFGEAALSAGLDHVTGEVALLIDADFQHPFEAIPMTINLWKNGYDMVYGIRNRTTESW<br>LKRVLTAQAYYRILNLSSPIDIPESAGDFRLLDARVVEAIKQLPEKNRYMKGLYAWVGFKSIGINFS<br>EQERQHGRSSFNLKSLFNLAMSGLTGFSDPLRVCIYLGAILALGAMSYGVWIIKTLIEGISIPGW<br>ATLAAGMTLLGGIQLLFILGEGYIGRIYAEVKNRPKYIISTEHSRTKQEHSHAHQENTFSSF                                                                                                                                                                                                                                                                                                                                                              | 3.2927298 | 0.001053475 | up   |

|        |                                      |    |    |    |    |      |                                                                                                                                                                                                                                                                                                                                                                                                                                                                                                                                                                                                                                                     |           |             |    |
|--------|--------------------------------------|----|----|----|----|------|-----------------------------------------------------------------------------------------------------------------------------------------------------------------------------------------------------------------------------------------------------------------------------------------------------------------------------------------------------------------------------------------------------------------------------------------------------------------------------------------------------------------------------------------------------------------------------------------------------------------------------------------------------|-----------|-------------|----|
| V5RCU9 | Glycosyltransferase                  | 12 | 4  | 7  | 4  | 42.3 | MKILHAAYMKDASSGIVNQMYWEQEA AKELGISWKSILFVQNPNGFHNNEIVTVCDIMGGEL<br>KKWFKAKKSYYSWLEGIMQEYDVLIIRHSLCDPFEPFFIRKMIKPVYIMHHTFEIDELYSYNYGV<br>KTKIKSLMEIYFGKKSISYSKGVAVTKEIFLYENSRVNGKFKKEIYVNGIISQHDIIILDDRNDNIP<br>EIVFIASYFNGWHGLDLLLHNLSSINDDFILHIVGDVSVDELLAKKDSRVILHGHLLNIEISQLMS<br>KMWIGLASFGLFRKGMKEACTLKVREYLNYPGLPIYSGHKDIFPEEFYKFGPEPKFVDILSFAHL<br>MRKVS KSDVKQA AIFDKKILLKELYEQ LLEEK S                                                                                                                                                                                                                                                     | 5.2220253 | 5.68E-08    | up |
| V5REA9 | DgaA                                 | 34 | 9  | 37 | 9  | 35.8 | MKKFALIGAAGYIAPRHLKAIKETGNTLAVAMDVNDVSGIMDSHFPEAEFFTEFEFEFEAYVEDQ<br>KLGKEKLDYVAICSPNYLHAPHMKYALKNGIDVICEKPLVLNSEDLNMLAEYEKQYGAKVNSIL<br>QLRLHPSIILRDKVQAAPADKVFVDVLTYLTSR GKWY LKSWKGV DNKSGGVATNIGVHFYD<br>MLHFIFGKIVKNEVHYRDEKTASGYLEYERARVRWFLSIDANNLPENAVQGEKLTYSITIENEE<br>LEFSGGFTDLHTQSYQRVLEGGYGV EENRAAIETVEVIRVSPHIENPENPHPLLAKVKKA                                                                                                                                                                                                                                                                                                      | 3.9525062 | 2.91E-06    | up |
| V5REF7 | Wza                                  | 42 | 13 | 40 | 1  | 40.5 | MKYCQFFSVLALSLSAASCAVTSGLQTYDIPSEG VYKTDLGTTVNVVKISQETLPAIQPAQIDYQ<br>RDYASLFK TQQSIYRLSPGDVLSIQLWAYPEITPPVNSISNEQSVQANGYPIDQTGYIQFPLVGRY<br>KAAGKTLAQVNR ELHSQLARFLK NPDVVVRVVS YEGQRFSVQGSVTKGGQFYLSDQPVSIYTA<br>LGMAGGVTTTGDNTYIQLIRNGRTYNLNTIDLEKAGYSLHKLLVQPNDTIYVSTRENQKIYVMG<br>ESGKNQALPMRDQGMTLTDALGESLGINPLSGSASRIYVVRTNPNDR TTEIYHLNLM SIGDFGLA<br>NQFRLRSNDV VYVDATGLTRWQRIVNQIIPFSNALYNIDRLGQ                                                                                                                                                                                                                                          | 10.146481 | 0.032607011 | up |
| X2F9Q9 | Amylovoran biosynthesis protein AmsE | 7  | 2  | 4  | 2  | 31.9 | MFSVLSSIYHKEQPEHFNTCMESIWDNQTLKPTEIVLIEDGPTPELDQVIAQWQK KLG DVLRVT<br>KLEKNVGTGKAKNIGLQECNYDIVSIVDTDDIYVPERFEKQIKFLQQNPEISIVGGQIFEFIEDIGNP<br>VGMRKVPLSNVELRNYAKKQSPFNMTITYRKSHILEVGGYQHHLWMEDYNLFLRVI AKGYKI<br>ENLPDVLVYARIDNGMHGRRKGLQYIKSEKQLLDLKKQLKLNPLYANMLFLVRS AFRLLPAN<br>LLGTIYNTFLRKDIKK                                                                                                                                                                                                                                                                                                                                                | 2.2516504 | 0.001826913 | up |
| X2FEM8 | Aminotransferase DegT                | 50 | 13 | 55 | 13 | 39.3 | MIDFIDLKAQQNRIKDKIDAGIQNVLTHGQYILGPEVIELEEK LASYV GAKHCITCANGTDALQIA<br>QMAFGIGPDDEVITPGFTYIATAETVALLGAKPVYVDVNP KTYNLDVEKLEAAITPRTKAIPVSL<br>YGCADFDAINAIKKYSIPVIEDAAQSFGATYKGRKSCNLSTVACTSFFPSKPLGCGYGDGGAIFT<br>NDELAKVIRQIARHGQDKRYHHIRVGVNSRLDTLQAAILLPKLEILDDEM QARQ RVAEVYNRL<br>FDEVGIHTTPYIEAHNTSAWAQYTIQVDNRAEVQEKLKAQGIPTAVHYPIPLNKQPAVADSDIHL<br>PIGDAIAEKVMSLPMHPYLAIDDQLKIVKAFG                                                                                                                                                                                                                                                       | 5.1735465 | 0.003466715 | up |
| X2FEM9 | Glycosyl transferase                 | 40 | 8  | 14 | 8  | 39.0 | MKILFLINSLKSKSGSERVAVELANKMAAIGSYNITLLNRESIKENAAYSIADNVEVIALSGSLFEF<br>YK K L K K Q I S S N N Y D V V V H N M G K L S L L C A F V P N I K K L V V L E H V S F I S R P K K I Q L S K F L Y R N I D Q<br>V V T L T Q N D K E Q F D K F H S N V I P N F S P F S I A S Q P R N N N K Q I V T I G R L T D Q K N Y I H L L Q A W K K I Y Q S<br>I P D W Q L N I Y G E G E Q E E I L Q D Y I K Q Q S L K N V S L K G S T S N V K E V Y E Q S S F F V M S S K Y E G L P M V L I E A<br>Q S F G L P I V S Y N C P Y G P S D V I R D S K N G F L V E D Q N V D E L A A A V L K V A L S P Q L L E Q F S Q S S L L N A K K Y<br>Q P E Q I L K I W I E K V L E G | 4.7465335 | 0.001542928 | up |

**Table S4: DEPs in XDR vs. MDR strains.**

| Protein ID | Description                                             | Protein Coverage (%) | Peptides | PSMs | Unique Peptide Number | Mass [kDa] | Protein Sequence                                                                                                                                                                                                                                                                                                                                                                                                                                                                                                                                                                                                                                                                                                                                                                                                                                                                                                                                                                                                                                                                                                                                                                                      | FC XDR/MDR | P-value XDR/MDR | Regulate |
|------------|---------------------------------------------------------|----------------------|----------|------|-----------------------|------------|-------------------------------------------------------------------------------------------------------------------------------------------------------------------------------------------------------------------------------------------------------------------------------------------------------------------------------------------------------------------------------------------------------------------------------------------------------------------------------------------------------------------------------------------------------------------------------------------------------------------------------------------------------------------------------------------------------------------------------------------------------------------------------------------------------------------------------------------------------------------------------------------------------------------------------------------------------------------------------------------------------------------------------------------------------------------------------------------------------------------------------------------------------------------------------------------------------|------------|-----------------|----------|
| A0A009G507 | Glycosyltransferase subfamily 4-like, N-terminal domain | 48                   | 12       | 21   | 11                    | 42.9       | MQNKKIVLIGTTGSSFYGFRA DLIRSLVANGHQVYAF TSEYTENCLDKIKALGAEPITYQLSRGG L NPFADIASTYQLIRKIKKIKPDI VFSYFAKPVIIYGT LAASF AKVPHIIGMLEGLGYTFTAQPEGQSS KTKLIRNIQVLLYRLAF PRLDDMIFLNPDDEKDLIHTY TLPVKKVHILGGIGLDLKEYSYSVAPVS PVSFLFIGRLLKEKGIFEFIDAIRIVKHKYPNTKFTILGGLDTQNMGALS KSQLDELIAEGLFEYPG HVSNVKDWIANS SVFVLP SYREGVPRSTQEAMAIGRPVITTDVPGCRETVINDVNGFIVPCWDA KALAEKMCFFIESPSQINLMGLESMKMAHQKFDAEKVNNR LFEIMGLNSSSYEKIG MSQTSKTEDTIDLKELFFSLIAQWKLIVLCILISLVCALIYLRVTPNTYSVDALVQVEDTKSAASA ALLGELSKMVDQKSPAQAEIEVLT SRMVLGQVINNLNLDITIKNHDDTFFNRLLSQDKQNIDYKK DAVTFSNKDSYFSIQQLQIPSY YLDKPLLSFKDQRHFTFSYKDKVIFSGQLNSNNLVTAREGQW KVRINSTHAPSVEQQFTISKLALPTAVQKLGSTYGVAER GKQTGVISLNYQGT DKEHITEVLNNI LAVYHSQNIERRTLESKQTLDFLDKQLPDLKQQL EESERKFNQFREKYN TVDVTQEAEYLKQNI ALETTKTELKQKQAE LAAKYTN DHPLMAEINAQLAAV NKKSAELSDTLKRLPEVQRQYLQLYR DVKVNTELYTSLNSYQQLKIAKAGEIGNVRIIDTA VEPVNP IKPKTLIVLVTIFIGGFIGILIALLR NMLRTGVKDSTQIENDLNLPVYATVPRSPIQETRMN ILKKKKSIPILAVKSSDDIAIESLRSIRTAIH FALTTAKNNIIM IAGPSPEV GKSFISTNLATIFAQSNKR VLLIDADMRRGYMHKYFDVDVKPGLS ELLSGQADLSQVLHKTQVANLDVITRGKSP TNPSEMLSSTQFKDLLEK FQTQYDHIIDTPPVLA VTDGHIISQYTG VNLIVARYAKSHMKELELTINRFEQAGVKVNGFILNDIQRSSGGGYGYNYAYAY KAKQED | 0.3205854  | 0.02595631      | down     |
| A0A009G8E9 | Tyrosine-protein kinase wzc-like, C-terminal domain     | 45                   | 27       | 88   | 18                    | 82.0       | MFNLEQLHIAIIGLYVGLPLAVEFGKKVPVIGFDI HQKRIDELNNGQDHTLEVSKEEIQQAVKLR YTSSEDLKDCNFFIVTPTPIDDFKQPDLTPLIKASTSIGQALKKGDVVVYESTVYPGATEEVCIP VLEKISGLNFNQDF FAGYSPERINPGDKLHRVTN ILKITSGSTPEVADYVDEVYNLIEAGTHKAPS IKVAEAAKVIENTQRDVNIALINELALIFNKNIDTEDV LKAAGTKWNFLPFRPGLVGGHCIGVD PYYLTHKAQSIGLHPEIILAARRLNDRMG EYVATQLIKEMVKQRIQVVGARILVMGLSFKENC PD IRNTKIVDFIKALKEYDLDLDIYDPWVDENEVQHE YGLAPIKKLGNGLYDAIVIAVAHNQFKTM RAQEFQALGKEKYVLYDLKYILDKTESDLRL                                                                                                                                                                                                                                                                                                                                                                                                                                                                                                                                                                                                                                                                                                                                                     | 0.1970634  | 0.002440226     | down     |
| A0A009G8K1 | UDP-N-acetyl-D-mannosamine/glucosamine dehydrogenase    | 53                   | 19       | 40   | 11                    | 47.7       | MKIQKHFVITGGGSGLGAATAEYL VKQGASVTLVDMNVEAGEQQAKQLGPKADFVKLDVTD EVAAEQFFKDVLVKHSHLHGLVNCAGIGPSAKVVGREGVHDLGLFAKTLNINVTGTFNMLRFA ADAMSKNTVEAGEEDRGVIVNTASVAAFDQGIGQAAYSASKGAI VAMTLP IARELARHAIRIMTI APGIMETPMLKGM PQNVQDALGQMVPYPSRLGKPEEFARLV AHIAENSYLNGEVIRLDGAIRM AAK                                                                                                                                                                                                                                                                                                                                                                                                                                                                                                                                                                                                                                                                                                                                                                                                                                                                                                                              | 0.1970634  | 0.002440226     | down     |
| A0A009GAT0 | Short-chain dehydrogenase/reductase SDR                 | 23                   | 4        | 7    | 4                     | 27.0       | MKIALFGTTLYAGVMAALLAEYGNQIYWCTSVTCEENISILSYQDQEVNHLYLNKQRKAGFLKES PFSEIPLDIEVYLCFSP TQIELALKTVEKLSERP I VHPRLMINGSTFGLHGT DQLKQHLPKDEWVY FPDVIEGNAINSVLNVKHVIVGV ESSYAQDTMQELLRPFFRSYQYLFMPILDAEFTKLSISGML ATRISYMNDLAMVAEKL GIDIANVKHGIAADTRIGAA YLSAGVGFGENFSHDILTLSSTVSGTG AKSRLLQVWAIN EQQEKILFRKLWNY YHCDLSGKTVAIWGASFKENTSS THNSPIHILLAALW AQGVKVR LHDPQALDEIATTYGDREDLVLCADQY EAAQGAHALCLVTAWKQY WSPDFKQLQ QLMQHPLILDGRNIYDPA YVKS GFAYEGVGR L                                                                                                                                                                                                                                                                                                                                                                                                                                                                                                                                                                                                                                                                                                                                                 | 2.0517858  | 0.001816128     | up       |
| A0A009GKU9 | UDP-glucose 6-dehydrogenase, bacterial type             | 40                   | 12       | 27   | 1                     | 47.2       | MAQVQDPTFWGGNIAFWIQTLVFFISALIAIYTLRRNEAQAKKRATVDLVLSETQDMYFRDIKEK FGKYKKGGMNFTKLACEELADNPEENDVIMTILNHYEFIASGIFEKALDEEIIYKRMKKGILVRD WKTLEPYVMELRRRKNRKA IYAETQRLAEKWEKDKG PSSKFWKR                                                                                                                                                                                                                                                                                                                                                                                                                                                                                                                                                                                                                                                                                                                                                                                                                                                                                                                                                                                                                    | 3.4485981  | 0.000257366     | up       |
| A0A009GU27 | Protein of unknown function DUF4760                     | 29                   | 6        | 10   | 6                     | 20.6       | MTDIVVNGARTAMGGFQGSLSGLTAPELGAVTIKEAIARAGLQPTDVEEVIMGCVLPAGLKQG PARQAMRKAGLPDSTGAVTINKLCGSGMKAVMQAADM IKAGSAEIVVAGGMESMTNAPYVLP KARAGYRMGHGEIKDHMFFDGL EDAETGRLMG SFAQDMANTRGYTREQMDDFAIRSLKRAQT AITEGYFKDEIVPTVSTRKGDVIVDQDEQPLNAKIDKIPSLKPAFAKDG TITANASSISDGASAL VLTSS EVA AQRLQPLAKIHATASNSQHPSEFTIAPVGAIEKVLK KAGWNAQDVDLWEINEAFAM VTMCPIDDFKLDPEKVNIHGGACALGHPV GSTGSR IILTLIHALKRTGGKKGVAAALCIGGGEATA VAI EIL                                                                                                                                                                                                                                                                                                                                                                                                                                                                                                                                                                                                                                                                                                                                                                                  | 2.2589751  | 2.01E-05        | up       |
| A0A009GVM1 | Thiolase                                                | 83                   | 21       | 98   | 1                     | 40.8       | MAQVQDPTFWGGNIAFWIQTLVFFISALIAIYTLRRNEAQAKKRATVDLVLSETQDMYFRDIKEK FGKYKKGGMNFTKLACEELADNPEENDVIMTILNHYEFIASGIFEKALDEEIIYKRMKKGILVRD WKTLEPYVMELRRRKNRKA IYAETQRLAEKWEKDKG PSSKFWKR                                                                                                                                                                                                                                                                                                                                                                                                                                                                                                                                                                                                                                                                                                                                                                                                                                                                                                                                                                                                                    | 2.327478   | 0.000151465     | up       |

|            |                                                                                    |    |    |    |    |      |                                                                                                                                                                                                                                                                                                                                                                                                                                            |           |             |      |
|------------|------------------------------------------------------------------------------------|----|----|----|----|------|--------------------------------------------------------------------------------------------------------------------------------------------------------------------------------------------------------------------------------------------------------------------------------------------------------------------------------------------------------------------------------------------------------------------------------------------|-----------|-------------|------|
| A0A009GY40 | Flavoprotein pyridine nucleotide cytochrome reductase                              | 69 | 17 | 57 | 17 | 39.8 | MSQFVPLKVKISITPQTDEAICIAFDVVPPEQQEQFQFQPGQHLTIRHLTEAGEIRRCYSICSYAGKE<br>DISIAVKKIDQGQFSNWANDHLKVGDVLEVMPQGVFFQKAAKMGQNYLGVAAGSGITPILSI<br>IKQVLFQEPEANFTLLYGNRSWKQTMFAEQIMDLKDQFKERFQLINIFSRFNDSSELMNGRIDAE<br>KLKQLFDYEVLETNFDHVFACGPDEMNAVENTLPNFGIAKERIHTERFHTGQARKRSVEADA<br>NRKEEKVNIILDGRELIVSVAQDDESILDAALRAGADLPYACKGGVCATCRCKVLSGEVDMFLN<br>YSLEEDEVEKGYVLSQCTLPKGSNVRLSFDE                                                       | 2.8491423 | 0.002352016 | up   |
| A0A009H3M3 | Protein-tyrosine phosphatase, low molecular weight                                 | 40 | 5  | 12 | 2  | 16.5 | MQINNILVVCVGNICRSPMAEYLLKRQFPHLHIESAGISGLIGNADEKAQLCMQRLGINMQAHI<br>AQKLDAAEHKRADLILVMSHNQKHIEQTWPFQKGTFRLGHWQKNVPPYPQHDQTFDETC<br>ELIQKCLDDWKNYI                                                                                                                                                                                                                                                                                          | 0.1581607 | 5.88E-05    | down |
| A0A009HXJ2 | Aminomethyltransferase folate-binding domain protein                               | 42 | 8  | 28 | 1  | 26.7 | MSLLAFSSYALNGVDAQKFLQGQVTVDTERLAENETRYTAICDLKGRIHFGLWLKKNNAESFDII<br>VTQDQAEFAKHKKYGAFSKMTLSEQGVAVFPKVVNGHTEFSSSTETDISEWQKQAIMTGQAWIA<br>QATEHEFPQQLRLHQREGVNYDKGCYLGQEIARLWFKAKPKHWHLHVQGTGDAPAPATQL<br>HNDVEVVNSTQTTDGYIALVAKPAALQELGLQVLDLPEALSGDVARPQ                                                                                                                                                                                  | 0.3332263 | 0.00064365  | down |
| A0A009PBA1 | ER-bound oxygenase mpaB/mpaB'/Rubber oxygenase catalytic domain-containing protein | 7  | 3  | 4  | 1  | 47.3 | MISPTRLASFNDMQDSNFFTQFLNICCEKPVQPSYTEYVSLQHALYEGDIEMDKVIDWVMQNPK<br>DHRIFEKILFQGRDELSEPIPELENFFNYIEQKPDWLDQQQIDEAVKFTHRLGINNGFILRDLSL<br>MAGYLYPGFNQPLILTGALKKEAGTRLAETTKWWVDITEPHGLSRLSAGFTSTIYVRFIHALVRR<br>QLKSDRWDNEVWGIPLNQFDLAMTNLAFSSVLLGIRALGIWPTKQEAKSFLHFWRYVGVWL<br>MGIEEKWLIQSEPEGWRLLYWMQFAHPRSDHSSIELGSSLSKEPLERKYLHLRSLQKQLAYRQH<br>LELTQFFIGKKRMKLLGLPQQSASWFAYYLIVRNLLLYNGAKLSPKVEKFLSKSRNIQKLGTLT<br>YQNQGKAKTLASMHHSNGI | 0.1232098 | 0.021701975 | down |
| A0A009PWD1 | Short chain dehydrogenase family protein                                           | 62 | 13 | 26 | 2  | 27.7 | MAKTILITGASSGLGAGMAHEFAAKGYNLAICARRLDRLETLKTELENQYGIKVIAKSLDVTNY<br>DQVFVFRFAFKQEFGLDRIIVNAGVGNRRRIGKGNFEINRATAETNFISALAQCEAAIEIFRAQN<br>AGHLVVMSSMSAMRGLPKHLSTYAASKAAVAHLAGIRAELLDTPIKVSTIFPGYIRTEMNEGA<br>KHLPFVDAKTGCKALVKAIEKQPVKAYVPQWPWLPMSIAMKVLPLRLVNLKGLCTRQK                                                                                                                                                                     | 2.2289624 | 0.005116918 | up   |
| A0A009QD14 | Enoyl-CoA hydratase/isomerase family protein                                       | 43 | 6  | 16 | 6  | 27.9 | MQELIKASTAADGVLLLTLNRPEKRNALNATLQCLCELLEEAHNAQVKAVVLTGNAQCFAA<br>GADLSELAAMDVAVSLQDIRPKLWQKIDAFSKPLISAVNGYALGAGFELVLHSDMVICGENARF<br>ALPEIGLGMPLPGAGGTQRLARLVGQQLTMRWAMTGEMISAKQAEQHIGCSQVVPTELTVVEYAV<br>QLAAKIAKQAPLAIRVIKQSIKSIHETLSQGLKFERQNFVWLAATKDRNEGINAFFEKRPVFRG<br>E                                                                                                                                                            | 2.6323829 | 0.000836971 | up   |
| A0A009QHT0 | DUF3298 domain-containing protein                                                  | 28 | 7  | 14 | 1  | 32.5 | MNLSKKTIALVVAIALILAICVFVWKKPQSSSSSQENSASTQDHPVEKAEVLPYLNLTETKANY<br>AVPFCCKNCIDVDIQTIKTQDAWLNWSWIEKNQTKVIQAQINLKKDLSLQQAINAYVKKSDIEWQ<br>DKYSKNRAYELHIRTRIASQRNQVYLLQLALDSKQEEVTKIDRYFFVADRKLHKNLTLLDVVK<br>KDQQPTVHQIVQTAQDWLKKQTAADVKKQAPKTLTYWGQADWFFDGEGVGLHYQANQITKDA<br>PQLDIYLTTEQTKKILQPQVYEQMF                                                                                                                                    | 0.4880952 | 0.02361419  | down |
| A0A009QKJ4 | Polyprenyl synthetase family protein                                               | 61 | 13 | 51 | 1  | 35.5 | MVIDFKQDILAPVATDFAAMDHLINEGISSKVLVMSVSKHVVEAGGKMRMPIMCLLAARACGL<br>DNMQNAQRLLAAIEMLHTATLVHDDVVDESGLRRGRPTANATWNNQTAVLVGDFLIARFDLL<br>VDLNNMTLLKDFSTGTCEIAEAGEVLQLQSQHQPDTTEETYLKIHGKTSRLFELATEGAAILAGQE<br>AYREPLRLFAGHFGNAFQIIDDILDYTSDAEILGKNIGDDLMEGKPTPLPLISALAHSTGEEHAIIR<br>SIATGGVDQLPKVIEIVQKSGALDYCQRRRAQEETEAALQALSILPDTPYRQALINLRLALHRIQ                                                                                        | 6.4177215 | 2.03E-05    | up   |
| A0A009T164 | DUF4393 domain-containing protein                                                  | 30 | 6  | 9  | 6  | 27.2 | MTEKDNNLNASFLDHRVATYKAIAGLIPGFGSILSEVVGAIIPDQRMDRLVKYIKILDTKVQKINS<br>DLLEIAKQNELAIDLIEEGFVQASRSLNERREYIANVVANGISDEEKNYADSKYILKLLGELNDQ<br>EVIWLRFFLHPTFDGDEEFRQHQNVIEPIATYIGADENILEKKDIQESYKSHLERLGLIRSNYRID<br>KNTGLPKFNHQGVPEVSYRFVTPLGKMMMLKKIGLIDSANT                                                                                                                                                                                 | 0.1894989 | 6.26E-05    | down |
| A0A059ZG34 | BolA family transcriptional regulator                                              | 46 | 3  | 9  | 3  | 11.3 | MSLEQQLIERLQTLAPSYLEVINESAGHGGYFPGKESHFKVIVVSEEFNGLRLVQRHQKVYALAS<br>DLMNPGQIHAIHAYLPSEWQGPASPECAHAPKS                                                                                                                                                                                                                                                                                                                                     | 2.0066563 | 3.29E-05    | up   |
| A0A062I638 | Endoribonuclease L-PSP family protein                                              | 24 | 2  | 2  | 1  | 14.7 | MRTAIFPQDRHALYEQHGYSAAIQSKDLLFVSGQVGSLEDGSPVPDFEKQVIQAFKNLAETLKA<br>AGCTFDDIIDVTTFHTDPERQFSIMKVKNQIFTQKPPYNWTA VGVTWLAGDFEIKVIARIPHN<br>N                                                                                                                                                                                                                                                                                                  | 0.3251437 | 0.043644326 | down |
| A0A062IBU4 | Activator of Hsp90 ATPase homologue 1/2-like C-terminal domain-containing protein  | 32 | 4  | 10 | 4  | 16.6 | MTTGTVKLHRVFKAPAERYVRAFLDPDALVKWMAPHGFTAKVHSFDAKVGGLYKMSFTNFST<br>GTHSFGGTYVELVPNELIRYNDQFDDTNLPGTMQVTTITLKTVLVGTETIHIHQEGEPIPEVPEACY<br>LGWQESLSLLKLLVEADIPDQ                                                                                                                                                                                                                                                                             | 2.2967846 | 0.033664917 | up   |

|            |                                                                           |    |    |     |   |       |                                                                                                                                                                                                                                                                                                                                                                                                                                                                                                                                                                                                                                                                                                                                                                                                                                                                                                                                                                                                                                        |           |             |      |
|------------|---------------------------------------------------------------------------|----|----|-----|---|-------|----------------------------------------------------------------------------------------------------------------------------------------------------------------------------------------------------------------------------------------------------------------------------------------------------------------------------------------------------------------------------------------------------------------------------------------------------------------------------------------------------------------------------------------------------------------------------------------------------------------------------------------------------------------------------------------------------------------------------------------------------------------------------------------------------------------------------------------------------------------------------------------------------------------------------------------------------------------------------------------------------------------------------------------|-----------|-------------|------|
| A0A062IDU6 | Glycerol-3-phosphate dehydrogenase                                        | 40 | 17 | 27  | 1 | 57.4  | MKVQPN DYSKIYDLAVIGGGINGVGIANDAAGRGLSVFLCEKDDLASHTSSASSKLIHGGLRYLE<br>HKEFRLVREALAEREVLLAKAPHIIKPMRFIMPHRPHLRPAWLIRAGLFFYDHLGKREKLLGSNLI<br>YFKEDSPLKPAITRGFEYSDCVDDARLVVLNALQAQKEGAKVVTTRTSCVKAYRQOELWHELE<br>QSRAEFYQIRAKAIVNAAGPWVEEIIKSNLGLSSPYQIRLIQGGSHIVVPKLYDCHKAFIMQNEARRI<br>VFAIPYLEKYTLIGTTDQEYTGDPQKVEITDVEIDYLLTVTNSHFKKQLTRADIVSQYSGVRALC<br>DDESDNPSAITRDYTLALQAEDKTPPLSVFVGKITYRKLAEAALEHLAPFFNDMAEEWTADE<br>ALPGAENWTTLEDLINQIKTRVSGISDSLNRWAHAYGTRVWNMLKERNIAEQLGQHFHGDLDL<br>ECEVRYLCEYEWAHTAEDILWRRSKLGLAFDEKQVKVLEAYLAERRLKDDAA                                                                                                                                                                                                                                                                                                                                                                                                                                                                                  | 0.1180205 | 0.023806631 | down |
| A0A062IH37 | Efflux transporter, outer membrane factor (OMF) lipo, NodT family protein | 75 | 25 | 134 | 1 | 52.8  | MQKVWSISGRSIAVSALALALAACQSMRGPEPVVKTDPQSYAYNSASGTSIAEQGYKQFFADPR<br>LLEVIDLALANNRDLRTATLNIERAQQQYQITQNNQLPTIGASGSAIRQVSQRDPNPNYSTYQV<br>GLGVTAYELDFWGRVRSKDAALDSYLATQSARDSTQISLISQVAQAALNYSFATANLRLAEQT<br>LKAQLDSYNLNKRFVVDGIDSEVPLRQAQISVETARNVDVANYKTQIAQAQNLNLLVGGPVPQN<br>LLPTQPVKRIAQQNVFTAGLPSDLLNRRPDVKAAYNLSAAGANIGAARLFPITISLTGSAGYA<br>STDLSDLFKSGGFVWSVGPSSLDLPIFDWGTRRANVKISETDQKIALSDYEKSVQSAFREVNDALA<br>TRANIGERLTAQQRVLEATNRNYTSLNARFRAGIDSYLVLDQAQRSSYAAEQGLLLLQANLNN<br>QIELYKTLGGGLKANTSDTVVHQPSTAELKKQ                                                                                                                                                                                                                                                                                                                                                                                                                                                                                                            | 0.1836444 | 0.049188659 | down |
| A0A062IH60 | Nitroreductase family protein                                             | 56 | 13 | 28  | 2 | 26.4  | MNLEQVRLVDEAITSRHSVRAFLSTPIEPEVIKDILRVASRAPSGTNTQPWKVYVVVTGHRKDEM<br>VERVCAAQIEVSKNPELAEQYKETFAYYPEKVVSPFIDRRRENGWGLYLLDIKKEKEKMAA<br>QQLRNFKLFDAVPGIFFTVNKAMGIGSKMDIAMMIQNVMAAKARGLDTCQAAWNHFHSLV<br>LDILGAADDEELVCAIALGHADPEHIVNTFITPREPVENFAVFLD                                                                                                                                                                                                                                                                                                                                                                                                                                                                                                                                                                                                                                                                                                                                                                                    | 3.3480194 | 1.11E-07    | up   |
| A0A062IMZ0 | Apolipoprotein A1/A4/E domain protein                                     | 36 | 10 | 62  | 4 | 18.3  | MTTENKLDLAKAADAQVQGEKALDDLKENVKEKQTAGKEAVADKVDELKTKAADAKVQG<br>EKALEDLKENVKEKQAAAKEAVEDKASDLKGLDQAQHSQDKFDHLRTEAAHKLDDAKAKA<br>AELKEEAATKFDELKTQATAKFDELKKTATEKLNKLNHDSAE                                                                                                                                                                                                                                                                                                                                                                                                                                                                                                                                                                                                                                                                                                                                                                                                                                                              | 2.578007  | 0.00291249  | up   |
| A0A062IRH0 | Valine--tRNA ligase                                                       | 53 | 42 | 188 | 1 | 108.5 | MTDAQTAQNIATTYDPTIEKKWYKTWEEQGYFKPSGHGESFCIMIPPPNVGTSLHMGHGFFN<br>AIMDALTRYNRMGKNTLWQPGTDHAGIATQMVVERQLGLQGITRHDLGREKFIEKVWEWKE<br>QSGGTITKQIRRLGSSVDWSRERFTMDEGLSNAVKEVFRVRLHEDGLIYRGKRLVNWDPKLTAL<br>SDLEVESKEEKGSLWHFKYFFEDKSVKTDQGDYLVVATRPETLLGDTAVAVHPEDERYAHL<br>VGKNIVLPITGRLLIPVADDYVEKDFGTGCVKITPAHDFNDYELGKRNSLPIINIFNKNAEVLGFE<br>YIAKAGEQISKTTAPADYAGLERFEARKKLVAQAEAEGLDQIQPYDLKAPRGDRSGVIEPLL<br>TDQWYVKIAPLAEPPIEAQVQDGRIFVPEQYSNMYMAWMRDIQDWCSISRLWWGHRIPAWYD<br>ADGNIYVGRSEEEVRAKNNAADIELKQDEVDLDTWFSSALWTFSTLWPEQTPELKTFHPTDV<br>LVTGFDIIFWVARMIMMTMHFMKNEGDSSQIPFKTVYVHGLVRDGEQKMSKSKGNVLDPLD<br>LIDGIDLESVAKRRTGLMNPKDAKIEKSTRKEFPDGINAYGTDVAVRFTFCALANTGRDIFDL<br>KRVEGYRNFCKIWNATRFVLMNVEGQTVGTDARPDWELPEQWISRLQKAEAAVHQAFATY<br>RLDLAAQAIYDFIWNEYCDWYVELTKPVLNDAEVSEERKAEVRRVLLAVMEASRLAHPLMPY<br>LTEEIVQTLAPMLGGGPTIMTAQYPIPEQAKINEQAEADMQWLQGLIGAVRNIRGEMGLGNA<br>RLLPVLLQNISNAEREQITRIEALFKALAKVESIEFLGKDQEPPLSSSSVVGHASVFPVKGLIDPK<br>AELARLQKDLDKIQKHQDQIANKLANEGFVSKAPAAVVEGEKAKLAFAAQLDKVKANMEQIA<br>AL | 0.1681657 | 0.002494653 | down |
| A0A062IS18 | Porin B                                                                   | 50 | 15 | 78  | 1 | 46.8  | MKTHKSLMVSVLSITLQVHAQAAAAFPNGSWMLGDWNGQRTALQAQGYDFSFGYTGE<br>YAGILDSKQSTHGSAYTGQLALGSHLDLKGILGWQDTEAQITLTYRDGQSLSEHSPALAGHQSS<br>VQEVRGREQTWRLTDLWIKKFLDQKLDVVKVGRFGEDEDFNSFDCDFQNLALCGSQVGNVW<br>GDQWYNWPVSWQAMRVKYNLQPDLYTQVGVYENPENLERGKGFNLSTDGSHGAIPEAEV<br>WSPKLVGQSMPEYRLGYYYSTADAKEIADSTKTSHKQGVVWVTAQKQLFPADQTDRLTGF<br>VNLTFHSDSTNKVDNMQNIQLVYKGLLNQRQPDELALGVARIHINDDWSVDQAKEYDTEYNTE<br>LYYGIHATNWLITIRPNVQYVRHVGALEKNGDNTWVGGIKFSTAF                                                                                                                                                                                                                                                                                                                                                                                                                                                                                                                                                                                      | 0.3870759 | 0.011842212 | down |
| A0A076G2N9 | HTH cro/C1-type domain-containing protein                                 | 35 | 4  | 11  | 4 | 11.0  | MAKLNDIISKRSPEQQRIKMANQMLLDINLSNLREELKISQAEIAKNLGVSQA AISKREKLGKD<br>LKISSLKEYVEAMGGKVRDLDELNGKHVAISI                                                                                                                                                                                                                                                                                                                                                                                                                                                                                                                                                                                                                                                                                                                                                                                                                                                                                                                                  | 0.314573  | 0.005842773 | down |
| A0A076G2Y6 | Uncharacterized protein                                                   | 55 | 6  | 14  | 6 | 20.5  | MSSYSIQIGQVKGLYDVLETCPVKNSPQYPELQKIGDDFLNKVVMEDPDYHNSQVFTILSQVAV<br>PEIQNRLKRLESKAKNKDFEKNYFDWNYIERGVVQERKDFINAIHLKQIYEKTKKLYEAQNGEE<br>LTSSIYADLLNANPNLRRMLTHKREIDTRLLEEAKKCLELSTK                                                                                                                                                                                                                                                                                                                                                                                                                                                                                                                                                                                                                                                                                                                                                                                                                                                    | 0.3594811 | 1.59E-05    | down |
| A0A076G3Q9 | Transcriptional regulator                                                 | 20 | 1  | 1   | 1 | 10.6  | MKTKEIIMPLKLISSSKKDDVYENIEALVLSIKKDGFLLPISVRMNPDKTGEFIVNLGENRFRAA<br>LALGLNTIPVYIEEAPKISIDFLFTSPE                                                                                                                                                                                                                                                                                                                                                                                                                                                                                                                                                                                                                                                                                                                                                                                                                                                                                                                                      | 0.4544614 | 0.005268512 | down |
| A0A090B7C1 | NirD/YgiW/YdeI family stress tolerance protein                            | 6  | 1  | 1   | 1 | 12.8  | MKMLKVILMTAGMATAGVVVANTPVNQAAIAPATVTTVKQALASKDNTPVKLGQVVKSLG<br>DEKYQFRDKSGSITIDVDELWQGRAVSANTNVTLIGEVDIDYKPLKRVEIDVQVQF                                                                                                                                                                                                                                                                                                                                                                                                                                                                                                                                                                                                                                                                                                                                                                                                                                                                                                               | 3.7488241 | 0.001545261 | up   |

|            |                                                            |    |    |     |    |       |                                                                                                                                                                                                                                                                                                                                                                                                                                                                                                                                                                                                                                                                                                                                                                                                                                                                                                                                                                                                                                      |           |             |    |
|------------|------------------------------------------------------------|----|----|-----|----|-------|--------------------------------------------------------------------------------------------------------------------------------------------------------------------------------------------------------------------------------------------------------------------------------------------------------------------------------------------------------------------------------------------------------------------------------------------------------------------------------------------------------------------------------------------------------------------------------------------------------------------------------------------------------------------------------------------------------------------------------------------------------------------------------------------------------------------------------------------------------------------------------------------------------------------------------------------------------------------------------------------------------------------------------------|-----------|-------------|----|
| A0A090BAM3 | Anthranilate 1,2-dioxygenase large subunit                 | 52 | 17 | 45  | 17 | 53.9  | MTSSNLKQWVDFIDGDCIDFRPNDGVFRIARDMFTEPELFDLEMEFIFEKVVWIYACHESEIPNNHDF<br>LTVQIGRQPIIVSRDGK GELHAMVNACEHRGATL TRVAKGNQSTFTCPFHAWCYKSDGRLVKV<br>KAPSEYCEDFDKSSRGLKQGRIASVYRGFVVSVDLTQATDSLEDFLGDALFLDLMLVNVQSPTELE<br>VLQKSSSYTFAGNWKLQENGLDGYHVSTVHYNVVSTVQHRQQVNASKGAELDTLDYSKLGA<br>GDSETDDGWFSFKNGHSVLFSDMPNPTVRPGYSTVMPYVMEKYGEKYAEWAMHRLRNLNLYP<br>SLFFMDQISSQLRIVRPVAWNKTEVISQCIGVKGETTEARRNRIRQFEDFFNVSGLGTDDLVFEFR<br>EQQKGFQARLERWSDISRGCQSWEYGATKNSQDLGIQPVITGREFTHEGLYVNVQHGHWQRLML<br>DGLNKKALKMQDITFENNAVMDEV                                                                                                                                                                                                                                                                                                                                                                                                                                                                                                             | 2.68764   | 0.003791067 | up |
| A0A09715H7 | protein-tyrosine-phosphatase                               | 67 | 7  | 15  | 3  | 16.3  | MQIKNILVVCIGNICRSPMAEYLLKQQYPQLNIESAGISGLIGHQADEKAQLCMQRLGIDMQPHIA<br>RKLNAELIKKADLILVMSSNQKHIEQTWPFAGKGTFRLGHWQKNVDPYPYQHEQAVFDETCQ<br>LIQQCVADWKLYI                                                                                                                                                                                                                                                                                                                                                                                                                                                                                                                                                                                                                                                                                                                                                                                                                                                                                | 3.7803763 | 5.19E-06    | up |
| A0A0D5YE03 | Helix-turn-helix domain-containing protein                 | 42 | 9  | 13  | 6  | 28.5  | MSTLQERMSLAIKHYESVTGKRFKNTELARFAGVSRANVGLVWNGPTQELEGSNLVKAEEFLG<br>VSKDWLAGQGNKMIATQLDGGGAQLNVLDIEAFKQKYNIPDSEDAVKFVQTSDKPFPIQKRYV<br>PVKAYSKMGMGDGYFTDMGYDGNAGDGYVPTHSAGPRAYGKGTGDSMFPAPRNGWYVVCDP<br>DAELVPNEFVQVCLDKGRCTIKEFVINGGVLSLLSVNGGERFFFEMDEVESITAITDIVPPSQHR<br>QEHYPSH                                                                                                                                                                                                                                                                                                                                                                                                                                                                                                                                                                                                                                                                                                                                                  | 3.9187661 | 1.31E-05    | up |
| A0A0D8EQN4 | Isoleucine--tRNA ligase                                    | 50 | 37 | 161 | 1  | 106.3 | MSDKQTTENAVDYKATLNLPTDQFAMKANLAVREVKWLEEWYTDNIYQQIRASRIGKKKYILH<br>DGPPYANGTIHLGHA VNKVLKDIIVKSRTLAFDAPYVPGWDCHGLPIELKVEEKVGVKVGKEV<br>DAATFRKHCREYALKQIDLQRDFKRLGILGDWDNPYLTMNYKQEA DIVRALGLIQKNGHIQPG<br>LKPVNWCMDCGSALAEAEVEYEDKKSDAIDVGFVVDLKDLSARVNVVEVDPTDIVIWTTP<br>WTLPANQAVALHAEIEYQLVQVTTTERGKQNFILAKDLVASAIERYKLENPVVLADFTGSALENL<br>TLQHPLL TDRQVPVILGEHVIATSGTGAVHTAPGHGADDYKVLQYNLKVENPVGGNGVYLP<br>APIFAGEHIYKANPKIIEALGAVGRLWAHQPIKHSYPHCWRHKTPHIFRATPQWFISMDQKGLRD<br>GALNAIENDIEFVFNWGNKRNIESMIEGRPDWCISRQRTWGVPIPFVHKDTNELHPRTPELIEEVA<br>KLIIEKIDAWFNDAKDFIGEDAQYNAVRD TLDVWFDSGTTHYAVLEQRDELESPADLYLEG<br>SDQHRGFQSSLLTSMAIHNRAPYKALLTHGFTVDENGRKLSKSLGNYIPLEIHKHLGADGLRL<br>YVASSDYRYEIAASKEIFSRVSDSYRRIRNTLRFLLANLNGFKPSTDALAVDDIALDQYILQRAN<br>EVQQTIIAAEEMNFHVVCALTSFCINDLGGFYLDIIKDRQYTTKADSQARRSAQTALYHIVQA<br>FVRWMSPILSFTAQEA WPLIPEQTEKYVFTA EWYDLPVSSKANLLSEADWQTLISVKS AVNKQIE<br>AARNAKLVGSNLSAKVELWANESLQTVLNQLADELRFVLITSQVVVHPFAEQGEATEMEGLRV<br>QVSAAEGEKCARCWHVLPDVNTHVDHPGLCGRCIVNVTGRGEVRKYA | 2.0613764 | 0.012674424 | up |
| A0A0E1FIC9 | Carbohydrate deacetylase YdjC-like                         | 8  | 2  | 2   | 2  | 30.2  | MAKVCYCADD FAMNAEISDAIQLEQGGALQATSCMTQSDLWETAAAKLKPFSDRV DIGLHLNL<br>THAFASGNL VFPLPMLIVRAWSASLNRELITQCIEEQWDLFVSVLGKQPDFIDGHQHIIHQFPFIRDI<br>LLQLLKEKFTGWIRNLQPINPPYRFKTRMLSALGSNSLAKACQTYHFNQNGQFAGIYDFKLT<br>NYGQLNQYWLANAKDHLLIMCHPALAQSKDQDPIQHARIQEYQYFSSDQFLDCQQYGIQLTR<br>MRYKNTIVRITVDMSFVPQIKIPATYMRGGTSKGVFFKLDLPEKAQVAGQARDQLLLRVIGSP<br>DPYGKQIDGMGGATSSSTKT VILAKSTQPDHDVDYLFQGVSIDQAFVDWSGNCGNLTA AVGSF<br>AISNGLVDADRIPEGLCTVRIWQKNIQKTHIAHVPIINGVQVQETGDFELDGVTFPAAEVQIEFLDP                                                                                                                                                                                                                                                                                                                                                                                                                                                                                                                                        | 2.6972978 | 0.007859562 | up |
| A0A0E1PN17 | Uncharacterized protein                                    | 21 | 9  | 23  | 1  | 43.5  | ADDGEEGDMFPTGNVVDQLDVP EIGSFQATFINAGIPTIFLNAEDLG YEGTELQDHINGDAAAL<br>ARFEKIRAYGAVQMGLIKDISEAAARQHTPKIAFVSKPKNYTASSGKNVSENDALLVRALSMG<br>KLHHAMMGTAAVAIGTAAAIPTLVNLAAGGGEREAVRFGHPSTGLRVGAQELTNGQWVVK<br>KAIMSRSARVLMEGWVRVPGDSF                                                                                                                                                                                                                                                                                                                                                                                                                                                                                                                                                                                                                                                                                                                                                                                                     | 2.6494059 | 6.38E-06    | up |
| A0A0E1PNX1 | Outer membrane protein transport protein (OMPP1/FadL/TodX) | 61 | 17 | 118 | 15 | 54.2  | MKFKERLKMKLKHLSTAMILATLPATGVFAAALDRSGQSMSAFFQPGNYFEAGISVLDPDVAG<br>KEAGSSATRRDIGDMANDY YFSAALKLQINDQFSFGLLYDQPPGADA EYSGNNVFNPNPSSDTI<br>LSQKALGDLASSIQKL VQASGSAFTPALIEVTKVTGGDPTKPTQTEILGALQQVAAGNTTVGA<br>GLTALQKTQA AINAANNYLGTGGTKVKVD TQNL SFVFGYQPTKNFNFYAGPVLTQTVKGNVSLR<br>GQAYSLYNGYDANIKETTGAGWLAGAAYQIPEIALRASVTYRSEIDHKVNIDENLSILNFPGLTS<br>VLAGLDVPASKLQAINSSGKTTITTPQSVNLD FQTGIMADTVAFANVRWVNWKDFSIQPYKFGK<br>VSEAVGGLVGRPNGFNLVEYSDDQWSVNAGVGRKLN DKWAGNVSVGWSDSGAGNPVTTLGPT<br>EGYWNVGLGVQYSPTPQTFIAGGVK YFWLGD AKAQTGAQAGSDEYVADFS DNNAIAYGLKLG<br>YKF                                                                                                                                                                                                                                                                                                                                                                                                                                                            | 2.6923462 | 0.004076788 | up |
| A0A0E1PP65 | Metallo-beta-lactamase                                     | 49 | 12 | 49  | 1  | 35.3  | MKKLFVALGLIMGSLHISY AEPASAAQQVPGYHHQFGNYRITSLLDGTIYLDPKLFKNLSPA EKT<br>KILTKYAAVNEKGIQTSVNAFLVDDGKSLTLVDSGAASC FGPQLGSI AKNLELAS YQLANVKT V<br>LLTHLHPDHVCGIAQNGKAVFPNATIY AHEREADY WLN PAN EKTVPADK KENYLGTVKNVKA<br>ALAPYQAKKAFKTFKDG DVIQGFVIN THGHTPGHHSFRLKSKGQQIVFVGDIVHSHSLQFDAPK<br>TGVDFDVNSEQA INTRLKMF AEISNKQQVVAAPHLFPFGIGHVYKVS AEQYQWIPL YFNNSLDK                                                                                                                                                                                                                                                                                                                                                                                                                                                                                                                                                                                                                                                                     | 2.8704422 | 1.13E-05    | up |

|            |                                                                  |    |    |     |    |      |                                                                                                                                                                                                                                                                                                                                                                                                                                                                                                                  |           |             |      |
|------------|------------------------------------------------------------------|----|----|-----|----|------|------------------------------------------------------------------------------------------------------------------------------------------------------------------------------------------------------------------------------------------------------------------------------------------------------------------------------------------------------------------------------------------------------------------------------------------------------------------------------------------------------------------|-----------|-------------|------|
| A0A0E1PQH3 | DcaP outer membrane protein                                      | 51 | 20 | 102 | 10 | 47.4 | MMDLFLNRKSFVVKSLAITVTALMMSGANAATSDKEIRKLRQVEEALKALVQEQRQVQQQQ<br>QQVQQQQVQLAEVKAQPQVVAAPVSPLAGFKSKAGADVNLVGFVRGDANYIIEGADNDFGD<br>VSKSDGKTHDKLRATAKTTRLGLDFNTPVGDDKVGKIEVDFAGSTTDSNGSLRIRHAYLTYNN<br>WLFQGTTSNFLANHAPEMIDFSTNIGGGTKRVPQVRYNYKLGPTTQLFVSAEKGDSTTSVTGDSI<br>KYSLPALTAKITQGYAEGRGSASARVLENYKSQLADDDKTGWGVAVGTDFKVS DPLKLFADA<br>SYVVGDN SYLYGNSNSPYAVDGN SIEQNEFVAVQVGGTYKILPNLRSTLAYGAQFSDDGTDYARL<br>NASANEKVQQA WINFIYTPVKPIDLGV EYVNGKRDTFDGKSYKDNRVGLMAKYSF                                    | 2.1884338 | 9.40E-05    | up   |
| A0A0E1PSU4 | Protein of unknown function<br>DUF3800                           | 3  | 1  | 1   | 1  | 27.7 | MRTFIYLDESGDLGWNMEKPYQKGGSSRMLTLAAICLPENKVKYVQRIVRALYEKRKRPLKNE<br>LKSVDLNLKDKEIFVKLTAKLIKDHPDIQLRSITANKEFVNARFKNDPNAFYNYMVKLLLLGTIC<br>KHKYVDFMPDRRSERVLKWNMGEYLKQMVLECGIENQIVNQSCNIMPMDSSKCLEQFIDFY<br>MHQTNKRSAILLFIVYSKCCSFATIPYFYIFYAYSTYLLQLVLFVVMKKVLQGAFFPFVIFASGM<br>LLLGCDDTQDHAKEQESVQTNDQISDQADDSQEQEITATQNKTELKNGNVFYIVRDAANLQLKA<br>GDYIEKLDKTDQDVEQAIQDKDQHELKTTVTTLKAQLEGLNQAALLGLDIRSQEVENIRQSLQA<br>NQQALSMPLLNKGLLEQINFQIEKQLNTIQMDMVKLAAMIMAGDEKSDSKTDS                                      | 2.3705251 | 0.000181544 | up   |
| A0A0E1PV91 | Lipoprotein                                                      | 49 | 10 | 18  | 10 | 27.8 | LLLGCDQTQDHAKEQESVQTNDQISDQADDSQEQEITATQNKTELKNGNVFYIVRDAANLQLKA<br>GDYIEKLDKTDQDVEQAIQDKDQHELKTTVTTLKAQLEGLNQAALLGLDIRSQEVENIRQSLQA<br>NQQALSMPLLNKGLLEQINFQIEKQLNTIQMDMVKLAAMIMAGDEKSDSKTDS                                                                                                                                                                                                                                                                                                                    | 3.2286971 | 0.000341739 | up   |
| A0A0E1PVE2 | Alanine racemase                                                 | 30 | 10 | 34  | 3  | 40.5 | MPRPITAVIHRQALQNNLAVVRKAMPNSKVFAVVKANAYGHGIERVYEAFAADGFALLDIEE<br>AKRIRALGWTGPILLLEGVFSPODLFDCVQYQLSFTIHSEAQIEWVEQHPYPAQFDVFLKMNSGM<br>NRLGFKPQHYYQAWERLNNLANVAKITHMMHFSADADGDRFGQQGIDYQITAFEEIVKDLPGER<br>SVNSAAAILRYQDQLKSDYVRSIMLYGSSPDYPHTSIADWGLQPTMSLRSEIISVQHLEPNESVG<br>YGSNFVAEQPMTIGIVACGYADGYQRISPTGTPVLVDSVRTVTRVGRVSMMDMLAVDLTGIESAKV<br>GSEVVLWGQSSTGVILPIDDVAVSSGTVGYELMCAVTARVQFINQV                                                                                                             | 3.76797   | 0.032456329 | up   |
| A0A0E1PVE6 | Nucleotidyltransferase<br>superfamily                            | 33 | 6  | 15  | 1  | 30.2 | MSDFIQLEYLQEKLQQLLAESLFAIYLYGSAVDGGLGPESDLVDLVVVVTQPLTSALREQLAQELL<br>KISQPVGELQRPLEVTILLKDEIQSGNYPLSYEMQFGEWLREELKEGGTSSQKDPDISILLRKARF<br>HHA VLFPGALDQW APEISDQELWQAMS DTYPEIVAHWDEDADERNQILALCRIYFSLVMKDIAS<br>KDNAARVWKSQLPPEQK FVLQRLIQEYRGEIGKQNWQEEHYALQPVNFSSKIEEQFEQKRNL<br>MERSFLLGCMRTKEFETDEIAEAA MQVFWRRGYAATSVDLDV DGTGLSRSSLYSTFQNKQGL<br>YQKALLRYELLTTLN NVKLLSGSGSAKALIRQLLMRVVEDELNDSEHKGCLVANACLELAGHD<br>EEVSQFVVSNLQKLQHALESLLIKAQQS GEIASTQNPRALASFFLNTMQGLRVLGKGSPEHRKQ<br>CLMDVVEVALNVL | 3.8252272 | 2.07E-06    | up   |
| A0A0E1PVF3 | DNA-binding HTH domain,<br>TetR-type                             | 7  | 1  | 2   | 1  | 22.7 | MNKYFTCYVVASLFLSGCTVQHNLINETPSQIVQGHNVVIHQYFDEKNTSGVVIQTDKKINLY<br>GNALSRANTEYVPASTFKMLNALIGLENQKTDINEIFKWKGEKRSFTAWEKDMTLGEAMKLSA<br>VPVYQELARRIGLDLDMQKEVKRIGFGNAEIQQVDNFWLVGPKLVTPIQEVEFVSQLAHTQLPFS<br>EKVQANVKNM LLLLEESNGYKIFGKTGWAMDIKQV GWTGWVEQPDGKIVAVALNMEMRSE<br>MPASIRNELLMKSLKQLNII                                                                                                                                                                                                                | 3.1422764 | 6.75E-06    | up   |
| A0A0F6SYM7 | beta-lactamase                                                   | 75 | 19 | 427 | 1  | 30.9 | MNLPTTMKIVEITVPGGPEVLKLDQSNVVPQADEVLIEVKAAGINRPDVLQRMGLYPMPKGV<br>TQIPGLEVAGVVAVGEQVQVQFKVGDKVCALTNGGGYAEYCAVTATQVLPDENLSFTQAAA<br>IPE TFFT WANLFDIGRLKKDETA LIHGGASGIGTTALAICHALGIKTFATVGS EDKVEALS<br>DLTTAIN YKTQDFEQEILNHTQEQQVDVILDIVGGSYFQKLNLLKRDGRLVIIGFMGGRI<br>AKEFDLQKLILK RATITGSTMRRARNSQEKAQIAQSLHEHVWPLLAQGKCLPQIYKTYAFSDV<br>QSAHACMEQGDHIG KIVLEMNA                                                                                                                                             | 2.0267156 | 0.003245112 | up   |
| A0A0G4QU89 | NAD(P)H quinone<br>oxidoreductase, PIG3 family<br>protein        | 51 | 14 | 50  | 1  | 35.9 | MNLPTTMKIVEITVPGGPEVLKLDQSNVVPQADEVLIEVKAAGINRPDVLQRMGLYPMPKGV<br>TQIPGLEVAGVVAVGEQVQVQFKVGDKVCALTNGGGYAEYCAVTATQVLPDENLSFTQAAA<br>IPE TFFT WANLFDIGRLKKDETA LIHGGASGIGTTALAICHALGIKTFATVGS EDKVEALS<br>DLTTAIN YKTQDFEQEILNHTQEQQVDVILDIVGGSYFQKLNLLKRDGRLVIIGFMGGRI<br>AKEFDLQKLILK RATITGSTMRRARNSQEKAQIAQSLHEHVWPLLAQGKCLPQIYKTYAFSDV<br>QSAHACMEQGDHIG KIVLEMNA                                                                                                                                             | 0.4274178 | 1.15E-05    | down |
| A0A0H4UME6 | Outer membrane protein<br>transport protein<br>(OMPP1/FadL/TodX) | 57 | 14 | 74  | 11 | 46.5 | MKLKHLSTAMILATLPATGVFAAALDRSGQSMSAFFQPNGYFEAGISVLDLDPVSGKDTSGNATG<br>DMANDYYFPSAALKLQLTDKFSFGLLYDQPFSDSEYSGKNNFVANPNDRLLPSPASPTLGQAG<br>LGNTITGGTSVEVDTQNLALVFGFQPTVNWNIYGGGVYQTIKGNVHLRGSAYSLYNGYDADIK<br>ETGGAGWLAGVAYQIPEIALKASLTYRSEIDHDVNIKENIPVNLVAANPALLFGALGITDPATQA<br>AIGQLASLQSDGKTITTPQSVNLDFTGIMANTVAFANVRVWVWKFDAVQPYKFGVLSKAA<br>GQLLPQLGKPNGFNLVDYSDDQWSVTAGVGRKLNKDWAGNVSVGWSDSAGNPNVTTLGPTEG<br>YWNVGLGVQYSPTPQTFIAGGVKYFWLGDADAVTGAHSAAGTFDDNNAIAYGLKLGKYGK                                   | 0.1798398 | 0.005364409 | down |
| A0A0J1ACY0 | Gp49-like PF05973 family<br>protein                              | 17 | 2  | 2   | 2  | 13.7 | MAWDVETTELFDWSLAEQDENAQDKILASLLVSELGPNLGRPHVDTIKESKYPNMKEIRVQVK<br>GHPIRGFFAFDPERKAI VLCAGDKKGLNEKAFYKEMIKIADEQYEQYLRDNYGDK                                                                                                                                                                                                                                                                                                                                                                                      | 0.2723999 | 2.51E-05    | down |
| A0A0J1DET4 | Endoribonuclease L-PSP                                           | 68 | 4  | 15  | 1  | 12.9 | MTVKRLHVTSRYCEVAISGNLVHLAGQLADDTSDVITAQTQQTLDNIDRLAAEAGTDKSHILSV<br>MIFLKDIDKDYAAMNAVWDAWISKEHPPARTCVESKLYAPDVLVEMTVVAVLP                                                                                                                                                                                                                                                                                                                                                                                        | 0.2163971 | 0.000149491 | down |
| A0A0Q1HCL9 | L-alanine-DL-glutamate<br>epimerase                              | 52 | 12 | 20  | 4  | 40.2 | MYRTIETILVDIPTIRPHQLSVTTMRTQTLVLVKITTTDGI VGWGEATTIGGLNYGEE<br>SPESVKAN IDTYFAPLLTSVKDLNV AQTLKLRKNINGNRFACKAIQTALLDIAKRLGVP<br>LSEVLGRLRNSL PVLWTLASGDTEKDIAEARKMIELKRHNTFKLKIGARPLQDDVDHVAIAIKKALGADVSVRVDVN<br>RAWSELECIHQIQLQDGGIDLIEQPCAIQNTALARLTHRFVDAIMADEALTGPDSAYRIAKNH<br>GADVFAVKIEQSGGLIEACEVGIAGLAGIDLYGGTMLEGPVGSIASAHVFATFETLAFGT<br>ELFGPLLLTEILKEPLRYENFELHLPTAPGLGIEIDEDKIEKLR                                                                                                                | 2.2352126 | 0.000249856 | up   |

|            |                                          |    |    |     |    |      |                                                                                                                                                                                                                                                                                                                                                                                                                                                                                                                                                                                      |           |             |      |
|------------|------------------------------------------|----|----|-----|----|------|--------------------------------------------------------------------------------------------------------------------------------------------------------------------------------------------------------------------------------------------------------------------------------------------------------------------------------------------------------------------------------------------------------------------------------------------------------------------------------------------------------------------------------------------------------------------------------------|-----------|-------------|------|
| A0A125S0J9 | Dihydropteroate synthase                 | 80 | 15 | 70  | 2  | 30.3 | MSYLFLSCTEIIIEAPMNKSLIIFGIVNITSDSFSDGGRYLAPDAAIAQARKLMAEGADVIDLGPASS<br>NPDAAPVSSDTEIARIAPVLDALKADGIPVSLDSYQPATQAYALSRGVAYLNDIRGFPPDAAFYQ<br>LAKSSAKLVVMHSVQDQADRREAPAGDIMDHIAAFFDARIAALTGAGIKRNRLLVDPGMGFLL<br>GAAPETSLVSLARFDELRLRFDLPVLLSVSRKSFLRALTGRGPGDVGAATLAAELAAAAGGADFI<br>RTHEPRPLRDGLAVLAALKETARIR                                                                                                                                                                                                                                                                       | 2.7930623 | 0.002038154 | up   |
| A0A126W935 | Nicotinate-nucleotide pyrophosphorylase  | 44 | 9  | 22  | 1  | 30.5 | MSIPQSLLEQSIQINIQQALQEDIGDGDITAMLTPEDEQATATIISREDMVLAGQPWVNALISAYD<br>NTVQVTWLKHEGDRVAANEAFKLKLAGSARSLTVERPALNFIQTL SAVATKTAEYVQHLEGLN<br>TKLLDTRKTLPGLRIAQKYAVTVGGGKNHRLGLDFAFLIKENHIMAAGGIAQAIKAHQIAPGKP<br>VEVEVETWDELNQALEAGADIVMLDNFNSQQMIDAVKHHVAGRCKLEASGNITIENTREVATTG<br>VDYISMGVLT KDVKAVDLSMRFNA                                                                                                                                                                                                                                                                          | 6.980508  | 2.28E-05    | up   |
| A0A158LX87 | Phosphoethanolamine transferase          | 14 | 6  | 26  | 1  | 60.2 | MFNLIIAIWLGAILNIGFYHQVHTLTPYFGVKAILFLAATLILVATYYAVLQILNWKWTAKIFAIL<br>LIFIGGFSSYFVNTLGVIIISPDQIQNMVQTDVSEVTDLISLRFVLWTVFFVILPIFLITQVKFKQEKV<br>SRLLLKKVFSLVASFAVVGVLLFTYYVDFAAIFREHRDLKGMISPQNSISSLSMSYHKKKAPKKNL<br>PLVIYGQDAHQVQRVQKNLPKLMILVVGETAARAEFSLNGYAKNTNPELSKQDIFNFSQVSSCG<br>TATAVSVPCMFSGMPRADYDEQLASHREGLLDIAKRAGYQVTWIDNNSGCKGACDRVEQYQIP<br>EDLKQKWCKDGECLDDILIDSLKQYLASIPKDDKRPRLVVLHQMGSHGPAYYKRAPEGYQPFKP<br>TCDTNAIQGCSPAELINSYDNTIVYTDHVLSQMINTLKEVSNYQTGFWYLSHDHGESTGEHGMYL<br>HGSPYSIAPSQQTHIPMIMWFSWGKQNNLAQVNLNQQTKQKLSQDNLFPSSLMLDVKTQVI<br>NPQLDMLHSCANVN | 6.2421835 | 4.38E-06    | up   |
| A0A1B1LW15 | histidine kinase                         | 12 | 1  | 1   | 1  | 15.6 | SHGDL SARAYDNRIHSAEMSELLYNFNMDMAQKLEVSVKNAQVWNAIAAHELRTPIITLQGRLOG<br>IIDGVFKPDEVLFKSLLNQVEGLSHLVEDLRTL SLVENQQLRLNLYELFDLKAVVEKVLKAFEDRL<br>DQAKLVPE                                                                                                                                                                                                                                                                                                                                                                                                                                | 3.5245971 | 0.000805269 | up   |
| A0A1E3M437 | Uncharacterized protein                  | 86 | 7  | 42  | 2  | 13.1 | MSNSDIQKINTNEVMSAVTVFNKVVYLSGQVPKNT EQD VAGQTR EILATIDELLALANTDKSRL<br>LSAQLYLKNLSDFSTVNAI WVDWLKGC VAPSRATIQADLVNPNWLI EIAV TAAQK                                                                                                                                                                                                                                                                                                                                                                                                                                                   | 0.0892574 | 0.019920098 | down |
| A0A1E3M652 | Isocitrate dehydrogenase [NADP]          | 69 | 23 | 138 | 2  | 45.6 | MGYQKIVVPADGDKITVKADLSLNVNHPPIPFIEGDGIGVDITPTMCKVVDAAILKAYGGKRSIE<br>WMEVYCCEKANKIYGYMPEETFEALREFVVSIIKGPLTTPVGGGIRSLNVALRQELDLYVCVRP<br>VRWFQGVSPVQHP ELTDMVIFRENSEDIYAGIEWKADSEEAKKVIKFLQEEMGVTKIRFPEGCG<br>IGIKPVSKEGTQRLVRKAIQFAIDNDKPSVTLVHKGNIMKYTEGAFKEWGYELALDRFGEGLIDG<br>GPWWKIKNPKNKGDIIIKDVIADAF LQQILMRPADYSVIATLNLNGDYISDALAAEVGGIGIAPGA<br>NIGGAI VYEATHGTAPKYAGQDKVNP GSII LSAEMMLRDMGWIEAADLI IKGISGAI AAKTVTY<br>DFERLMPGATLLRCSEFGDAIIQHMED                                                                                                                       | 0.1316173 | 0.040924774 | down |
| A0A1E3MB56 | Neutral zinc metallopeptidase            | 57 | 10 | 28  | 2  | 33.0 | MRWKGRRVSTNVEDRRGGGGV RAGGSIIGLVVAFVAWKFFGVDPQQA YQATQQVTASQQSN<br>ATAPESLTAEQKEASDFIR TILADTEDTWTPIFKQLGKTYTPPKLVLFSGMIQSGCGTAQSAMGPF<br>YCPADQKVYIDTEFFKDMREQM GISGEQNT ELSRQDQAGDFAQAYVVAHEVGHVHTLLGIS<br>SQVQARAQVSQREGNQLSVRQELQADCLAGIWANHNNQRTQFLEQGDVEEAMDA AQKIGDD<br>YLQKRATGQVVPDSFTHGSSEQRMHWFQVGLKTGDISQCDFNNSI                                                                                                                                                                                                                                                         | 0.1230412 | 0.003748649 | down |
| A0A1E3MBC2 | Geranylgeranyl diphosphate synthase      | 61 | 13 | 54  | 1  | 35.6 | MVIDFKQDILAPVATDFAAMDHLIN EGISSK VGLVMSVSKHVVEAGKRM RPIMCLLAARACDL<br>DNMQNAQR LAAIIEMLHTATLVHDDVVDESGLRRGRPTANATWNNQTAVLVGDFLIARAFDLL<br>VDLNNMTLLKDFSTGTCEIAEGEVLQ LQSQHQPD TTEETYLKIIHGKTSR LFELATEGAAILAGQE<br>AYREPLRLFAGHFGNAFQHIDDILDYTSDAETLGKNIGDDLMEGKPTLPLISALAHSTGEEHAIIRR<br>SIATGGVDQLPKVIEIVQKSGALDYCQRR AQEETEALQALSILPDTPYRQALINLTRLALHRIQ                                                                                                                                                                                                                          | 0.156712  | 2.81E-07    | down |
| A0A1E3MBE0 | DUF3298 domain-containing protein        | 45 | 7  | 24  | 1  | 29.6 | MQLYDKKIIFILPMLAAMVAVSGCQPKSTAKDEQLASSASVKEQKQAEV PVIQAKVVPVKLPK<br>KVCLEDGCTEYDFQT VQTNQK WINDYFTNR IKAADPNANLADKPVEVPEGEPSSSQSAGIYVR<br>YLGQNYNLATFAFQTYSSAGA AHGMSHQEFVNF D LLNKKHITVEELIKPDVEKQLVDALFDA<br>NTNWLQEHNISREKLQ LSDNFY YGANGIVFVYPIYELASYAEGMSEL TLPYFEAAKYIKPEYLP S                                                                                                                                                                                                                                                                                                 | 0.2533594 | 0.017616394 | down |
| A0A1S2G0B0 | ParB/RepB/Spo0J family partition protein | 59 | 22 | 61  | 22 | 47.0 | MSSLLGDLNAV DSSLTSANLNANNNSDR TILKLP LN RVKLD P QNVRLEYDQDYVKELANTILRD<br>GLLQPI SVRADSDNPGEYIINMGHYRYLAHKHLNLDTIEATIDNKLGSRRVKMSEN LFRKDMSSL<br>EVATNLKLMLEEGVAENPKYSYDDL ANEINKSKTWVSRR LQLLESDDYLKSLMANKM VND AE<br>TGTHIKNLLAEYPEEVALVADHEGAISSKLARVWSKELKGEIITSSTSEVTQSSLELQNSPKAGE<br>KNEDSKVDNTQELITETK ETLQPAKVQESVENTEAVKDEKSF TTTTQKQTKEIVKQANEKAFS<br>ELETAYFNGILESYV SILDLTSEDEDLVS VACGFLRSFN DENTANLFSWKS LIQY PVLVNE L ATIL<br>DSMAQLHVFPSSNVEDSRMQVILNQQDLI                                                                                                          | 0.2403727 | 3.13E-07    | down |

|            |                                                               |    |    |     |    |       |           |             |      |
|------------|---------------------------------------------------------------|----|----|-----|----|-------|-----------|-------------|------|
| A0A1S2GAH7 | Valine--tRNA ligase                                           | 53 | 41 | 173 | 1  | 108.6 | 0.2828602 | 9.28E-07    | down |
| A0A1S8V5S4 | Long-chain fatty acid transport protein                       | 13 | 6  | 27  | 1  | 53.2  | 2.3582364 | 0.000166821 | up   |
| A0A1T0DRB8 | TetR family transcriptional regulator                         | 21 | 4  | 8   | 1  | 24.2  | 0.3913784 | 0.000669201 | down |
| A0A241ZEM6 | Cysteine synthase                                             | 55 | 13 | 79  | 2  | 35.1  | 0.255273  | 0.03757904  | down |
| A0A241ZJ54 | DcaP-like protein                                             | 61 | 23 | 121 | 13 | 48.1  | 0.2023531 | 0.03135368  | down |
| A0A2I8CT67 | Isocitrate dehydrogenase NADP-dependent, dimeric, prokaryotic | 66 | 22 | 137 | 1  | 45.6  | 3.9574347 | 1.77E-05    | up   |
| A0A2U8NGD1 | Wza                                                           | 33 | 11 | 28  | 1  | 41.3  | 4.4095486 | 0.001035596 | up   |

|            |                                       |    |    |     |    |      |                                                                                                                                                                                                                                                                                                                                                                                                                                                                                                                                                           |           |             |      |
|------------|---------------------------------------|----|----|-----|----|------|-----------------------------------------------------------------------------------------------------------------------------------------------------------------------------------------------------------------------------------------------------------------------------------------------------------------------------------------------------------------------------------------------------------------------------------------------------------------------------------------------------------------------------------------------------------|-----------|-------------|------|
| A0A335J3M4 | Thiolase                              | 60 | 17 | 57  | 1  | 43.1 | MEDVLCDFIRTPIGRYAGALS AVRADDLAALPIKYLKDKHPNLPWNTVDEVFLGCANQAGEDN<br>RNVARMATLLAGLPDTPVAMTVNRLCASGLDAVGLAARSIKAGEAQFVLAGGVESMSRAPFVQ<br>AKLTEAFSRTPEIYDITIGWRFVFNKQLKAQYGTDSMPETAENVAEKYQISREDQDAFALRSQQK<br>TAAAQQNGFFNDEILPVEITDRKKNVVVNRDEHPRETTLEALAKLKAPFKKEGGSVTAGNASG<br>VNDGAACVLITNREFADTHGLKPLARVIGIASAGVEPKYMGIGPVPVAVQKILKQTLTLDQMDV<br>IELNEAFAAQLACMRELGLKDDDERVNPNGGAIALGHPLGMSGTRLVITATRELKRRGGRYAL<br>CTMCVGVGGVALILENLN                                                                                                                  | 3.0438897 | 0.000583786 | up   |
| A0A380V1V9 | Outer membrane efflux protein         | 75 | 25 | 137 | 1  | 52.8 | MQKVWSISGHSIAVSALALALAACQSMRGPEPVVKTDIQSYAYNSASGTSIAEQGYKQFFADP<br>RLLEVIDLALANNRDLRTATLNIERAQQYQITQNNQLPTIGASGSAIRQVSQSRDPNNPYSTYQ<br>VGLGVTAYELDFWGRVRSLKDAALDSYLATQSARDSTQISLISQVAQAWLNYSFATANLRLAEQ<br>TLKAQLDSYLNKKRFVDGIDSEVPLRQAQISVETARNDVANYKTQIAQAQNLNLLVGGPVVQ<br>NLLPTQPVKRIAQQNVFTAGLPSDLLNRPDVKAAEYNLSAAGANIGAAKARLFPTISLTGSAGY<br>ASTDLSDLFKSGGFVWSVGPSLDLPIFDWGTRRANVKISETDQKIALSDYEKSVQSAFREVNDAL<br>ATRANIGERLTAQQRLVEATRNRNYTLNARFRAGIDSYLTVLDAQRSSYAAEQGLLLLQANLN<br>NQIELYKTLGGGLKANTSDTVVHQPSAELKKQ                                 | 4.0364465 | 0.000145908 | up   |
| A0A385EQQ7 | SnoaL-like domain-containing protein  | 64 | 5  | 10  | 1  | 14.2 | MSLSQKEIAVRFLELAAGEVDEAYGNYTAPNFKHHNPPYAGDKISLKEGMRESAIETPNKVLE<br>VQHVIEDGALVAVHSKLEMQMNNKLTILAVVHICRFENEKIAEFWDIGIQPDPVLVNEGMF                                                                                                                                                                                                                                                                                                                                                                                                                          | 4.4729858 | 0.00268032  | up   |
| A0A385ET64 | Uncharacterized protein               | 64 | 2  | 10  | 2  | 6.6  | MKLAKTLLATTLALTAASTFAASKHDQAHNTAGEEKVVVSTQEANTANAASDAVGSASEAAP<br>ATR                                                                                                                                                                                                                                                                                                                                                                                                                                                                                     | 5.3994648 | 0.002729004 | up   |
| A0A385EUA0 | 1,2-epoxyphenylacetyl-CoA isomerase   | 58 | 12 | 47  | 3  | 28.9 | MDYQNIHAEKNGVGYLTFNRPKALNSFNVDMHREVAEVLVSWTKNPDVRCVVISGEGRGFCA<br>GQDLGDRVVDNNAEAPDLGYSIETYNPLIKTIVNMPKPVICAVNGVAAGAGANIALACDLVIA<br>AKSANFVQAFCLGLVPDSAGTWFLPRAVGHARAMGLTLLGDKLPAAETAKEWGMIDWVVEDA<br>ELKTKVTELAERLAKQPTFGLSLIKKAIHQSSNNTFDEQMLLERDLQRIAGRSEDYREGVQAFMN<br>KREP NFKGR                                                                                                                                                                                                                                                                    | 2.935053  | 0.000658446 | up   |
| A0A385EUT6 | 3-hydroxyadipyl-CoA dehydrogenase     | 38 | 17 | 35  | 17 | 57.1 | MTDLDLSRARIIVIGSGTMGIGIAQLAIVNGHTTVLYDLDAQKAQAVQGLGQTFKKLVEKSKL<br>TEQQADEALARLTVVNQIEALRDADLVIEAVVEKKEVKQSLFKQLAEICSAQTIFASNTSSISVTA<br>ISAGITHPERVVGLHFFNPAPVMKLVIVQGLKTPNSLCLALKNLMLNWKIPVLTSTPGFIVN<br>RIARPFYAEGFRALQEQTYSYDQLDYALKQCGGFAMGPCELTDLIGQDVNFSVTQSVYQEFFYE<br>PRYRPSLVQKELVDAGAWGRKSKQGFYTYNEKNQYQTFQPQAVVAKPVDAAHIQLKGTWSQLP<br>AFLTRLGLKSGSASDDNILQIDDIDLRLSQGESANIHYLSRKVVLMDWHHDFEQAEALVLSHNEL<br>CETNDLAKVEAYFAQFGMSVMWIKDHPALLTLRTIALLINEACEASLHGVASLEDIDNAMKYGV<br>NYPKGPYQWLTQMGGAYVLQTLNNLVYALYGEEKYRASIYKQYVAKTQNIATQYSRDMTEFA | 2.5755996 | 0.002153939 | up   |
| A0A385F163 | Ion channel protein Tsx               | 28 | 6  | 10  | 1  | 27.7 | MQLKQLAATCALLSATAMVQAKPIWQDFSVTGLYGENYEVVDDKETTITLEYAAKVYADV<br>FFMDRMREGEDDYKSTYFELSPRLSLGVEVSGKCLTYGPIKDVLISTTWESNTQNGNFDNLYGF<br>AVDLDIPYFYQYANLNFYRANNEKTDYDQMTFVYGIPIKASEDFLVDGFLDWSTAEDDHASEL<br>NWTQWKNVVGKHISPDTRLVYLIGIEHSVWNNKFGIKGADENNVSALVKYHF                                                                                                                                                                                                                                                                                               | 0.345583  | 0.006040995 | down |
| A0A385F1H2 | Uncharacterized protein               | 30 | 2  | 3   | 2  | 12.1 | MHSKIIGLTVIMGISSMAFAEPAIQGETLESLSKARITTNVNTQAATPTAQTSDATTEVKVEDID<br>PIIEEKTEETVKAAIQAPQATAEAVVTPIASQLNVSVDDIDVAHPTE                                                                                                                                                                                                                                                                                                                                                                                                                                      | 3.0333718 | 0.033480176 | up   |
| A0A3F3MQT9 | Adenosine 5'-phosphosulfate reductase | 63 | 12 | 38  | 1  | 28.5 | MRPSELLPGTPMTVIPTIDIVDALAAEYAAKSPREILELALSQQGEIAISFSGAEDVVLIDIASRLGK<br>FRVFSLDTGRLHPETYQFIETVRKHYNINIEICFPDAEAVQSMVNEKGLFSFFKDGHQECCGIRK<br>VQPLRKKLATLDGWITGQRKQDQSPGTRTEIPVLQADAGFSGPGKQLIKYNPLANWSSADVWSYIR<br>MMEIPYNPLHERGFVSIGCEPCTRPVLPNQHHEREGRWWWEEATQKECGLHAGNLKK                                                                                                                                                                                                                                                                              | 0.1998814 | 0.025160069 | down |
| A0A3S0N6T4 | Cro/C1-type helix-turn-helix domain   | 26 | 5  | 10  | 5  | 24.3 | MTIGARLKEERERLGYTQPVFAELAGTTKKSQIDYEKDLTPQKAGYLAIAEAVGADIGYIVTGN<br>KSPKLQNSDFAYEFDLVNVYDVSVSAGDGA VCLGETEPASRLAFRDKDWLARHGLYAKDLVIVY<br>AKGDSMEPTIHDKEPLLINTIDKELTDGFIYVVRNHNENFWKRVQRQFNELLLSDNEKYLPMK<br>LDLNESTDVEIIGRWIPPSRGTFY                                                                                                                                                                                                                                                                                                                      | 0.2194652 | 0.000307458 | down |
| A0A410J6J6 | Resolvase                             | 28 | 5  | 8   | 5  | 24.1 | MNNVARIYMRVSTEKQDLERQDKVINDARNAGYIYAAYVREKASGITPDRPELNMIHDLQAG<br>EVVIAERIDRISRLPLPEAEKLVIAIKEKGAKLSIPGVIDLSEFSKSDASGISKIVLDQVQDMLLKIAL<br>QMAHEDYLLIKKRREEGIELRKNKGLYNGRKAADKLLHDKIVELRKQNISISKTALIANCSVSLVK<br>LVWKRYSESNSQALK                                                                                                                                                                                                                                                                                                                          | 0.4093049 | 0.04215265  | down |

|            |                                                          |    |    |     |    |       |                                                                                                                                                                                                                                                                                                                                                                                                                                                                                                                                                                                                                                                                                                                                                                                                                                                                                                                                                                                                                                                                                                                                                                                                                                                                                                                                                                                                                                                             |           |             |      |
|------------|----------------------------------------------------------|----|----|-----|----|-------|-------------------------------------------------------------------------------------------------------------------------------------------------------------------------------------------------------------------------------------------------------------------------------------------------------------------------------------------------------------------------------------------------------------------------------------------------------------------------------------------------------------------------------------------------------------------------------------------------------------------------------------------------------------------------------------------------------------------------------------------------------------------------------------------------------------------------------------------------------------------------------------------------------------------------------------------------------------------------------------------------------------------------------------------------------------------------------------------------------------------------------------------------------------------------------------------------------------------------------------------------------------------------------------------------------------------------------------------------------------------------------------------------------------------------------------------------------------|-----------|-------------|------|
| A0A411MUY4 | Patatin-like phospholipase domain                        | 41 | 18 | 36  | 6  | 57.7  | MFEKIRSDMNP HQAYRIK KLQRQLDMAESYEEWKS FALKLDEETGAQEWKFDNSSPYFDAELIS YRYTLLKRYRQHQHRTL DLIYLLKEGLTYDIANIGHMPMLFAATHVGT KKLIEDYIEEVSQSLAYIAS SECITFORKKKIEFFENCEKAYGQPALMFSGGATLGLFHTGVCKALIEQDLMKPVLSGSSAGAIM TGMLGISASEDIQNLLNGEQFFSDAFHFRKLRRELKGNNGGIADVHYLKKFLIENLGDLTFFEEAFK SGLNINVA VAPYDATENPRIMNAIMTPNVLVWAVLASCAPVLPFPVRLTSKRYDGEHTPYMA NTKWVDGVSRSDFPQERMARLYNLNYTASQVNP HVVPMQDDARRFRKDVLSWPERILRRQG KVLSMGLMDFTRQLRGAISPVRRLLDHGYGVV GQRYYGVDVNIIAKYS LKHAYTLQNP RPHLF KRLQREGERATWPKISSIETHARIGKTIQH CLEVLRFEEKKQPESYYAEA                                                                                                                                                                                                                                                                                                                                                                                                                                                                                                                                                                                                                                                                                                                                                                                                                                                                                                                      | 2.2976708 | 9.41E-05    | up   |
| A0A411VGD7 | DNA-directed RNA polymerase beta subunit, bacterial-type | 71 | 74 | 609 | 2  | 151.8 | MAYSYTEKKRIRKNFGKLPQVMDAPYLLSIQVDSYRTFLQDGKSPKNREDIGLQA AFRSVFPIES YSGNAALEFVEYSLGKPEFDVRECLRGSTY AAPMRVKIRLIKDRETKSIKDVREQEVYMG EIPL MTENGT FVINGTERVIVSQLHRS PGVFFDHDKGKTHSSGKVLYSARIIPYRGSWLDFFEDAKDLV YVRIDRRRKL LATV LRALGYNNEQILNLFYKVPVYLDMGSYQIDL VPERLRGEMAQFDITDN EGKVIVEQGRINARHVRQMEAAGLTKLSVPDEYLYERITAEDITLRDGEVIAANTLLSHEVMV KLAEGGVKQFNILFTNDIDRGSFVADTLRADL TRDREALVEIYKVMRPGEPPTKEAAENLFNNL FFSSEYDLSPVGRMKFNRRLRGPYEVGTDQKSREVEGILSHEDIIDVLR TLVEIRNGKGEVDDID HLGNNRVR SVGEMTENQFRVGLVRVERAVKERLSQAETDNLSPQDLINAKPVA AAIKEFFGSSQ LSQFMDQNNPLSEITHKRRVSAFGPGLTRERAGFEVRDVHQTHYGRVCPIETPEGPNIGLINSLS VYAKANDFGFLETPYRKYVVDGRVTDDVEYLSAIEEVGT VIAQADS AVDKDGNL TEEFVSVRHQ GEFVRMPPEK VTHMDVSAQQVVSVAASLIPFLEHDDANRALMGSNMQRQAVPTLRADKPLVG TGMEANVARDSGVCVIANRGGVIEYVDASRIVIRVNEDEM VAGEAGVDIYNLIKYTRSNQNTCI NQNVIVNLGDKVARGDILADGPSTDMGELALGQNM RVAFMTWNGYNYEDSILLSERVLQEDRL TSIHIQELSCVARDTKLGAEIITADIPNVGEA ALSKLDDESGIVYIGAEV TAGDILVGK VTPKGETQ LTPEEKLLRAIFGEKAADVKDSSLRVP SGTKGTVIDVQVFRDGLKEDDRALAEKAQLDSYR KD LKEEYKIFEEAARERVIRLLKGQESNGGGSTKRGDKLEDDL SGLLEVDLLEIQPADEAIAERLTQI QVFLKEKSAEIDEKFAEKKRKLATGDELTTGV LKVVKVYLA VKRRIQPGDKMAGRHGKGVVS NILPVEDMPHDANGVPVDIVLNPLGVPSRMNVGQILETHLGMAAKGLGDKIEKMLKEQRTVLE LREFLDKIYNKVGGEQEDLDSL TDEEILALAGNLRAGVPLATPVFDGAEESQIKDLELADISRTG QTVLFDGRTGEQFDRPVTVG YMYMLKLNHLVDDKM HARSTGSYSLVTQQPLGGKAQFGGQRF GEME VWALEAYGAAYTLQEMLTVKSDDEVGRTR IYKNIVDGNHYMDPGMPESFNVLTKEIRSL GINIELKNGD | 0.2497468 | 0.003300984 | down |
| A0A429LHC2 | SDR family NAD(P)-dependent oxidoreductase               | 63 | 12 | 30  | 4  | 29.2  | MAKLDTLQNKVVVVTGASSGLGKALAGEFALQGAQVILTSRRFEELEEV RVGLLHPDQHLSVV ADITNQEQQEAYEQILKAKGRIDWLINNAGLSQRALIQDTTMATERAIMEVDYFSQVALTKTV LPTMLKQKSGRVVVFVSSVAGLLGTQYRASYSAAKAAIHMWANS LRAEVADQGEVSVIFPGFV KTNVSNFALNGAGQTQGHQDEAIENGL EADVFAEQSVKALMQGQEYIVVGGTKEKLGVMVSR MSPKLLYKMIRKTKVK                                                                                                                                                                                                                                                                                                                                                                                                                                                                                                                                                                                                                                                                                                                                                                                                                                                                                                                                                                                                                                                                                                                                                                          | 0.3580605 | 0.000396847 | down |
| A0A429MK36 | catechol 1,2-dioxygenase                                 | 64 | 13 | 34  | 13 | 33.2  | RQQIDALVKQMNVDTAKGEVDARVQQIVVRL LGDLFQAIEDLDIQPSEVWKGLEYFTDAGQAN ELGLLAAGLGLEHYLDRADEADAKAGITGGTPRTIEGPLYVAGAPESVGFARMDDGTETGKID TLIHEGTVTDTDGNIIENAKVEVWHANSLGNYSFFDKSQSDFNLRRTIFTDADGKYVALT TMPVG YGCPPEGTTQALLNKLGRHGNRPSHVHYFVSAPGYRKLTTQFNIEGDEYLWDDFAFATR DGLV ATAVDVTDAEIQRRGLDHAFKHITFNIELVKEAAAAPSTEVERRRASA                                                                                                                                                                                                                                                                                                                                                                                                                                                                                                                                                                                                                                                                                                                                                                                                                                                                                                                                                                                                                                                                                                                                       | 2.6515409 | 0.01798234  | up   |
| A0A481WVU6 | Pgt1                                                     | 4  | 2  | 2   | 2  | 71.5  | MVFLRQQLLFIFIAFLSTCVGIYVAVDMNLTWHK FYTYLISEKAIF SILFNYAVIQLFFIILGRKYT ALCLSQLFVIFLNFKKKKQQYLFSNLSPE DIFLLPEAMKATPWHLQLIFFILIIFFLIILIAVRKESK ATFHTYVPNIIIFGLISSGLIYLN FIRNPTGACFSENKPMICASLQEFPNTRNDWIGDYRKIQDYGFV TFYVSKVLDNVTSVLLPSRKVSEQDIQILQHHFVQPLEKNEKEYPNIIIVMEESFWDSSHLESG LPKDILLSFVHQNVSNLLSPSFGGGTANVEFEVLTSLN TTFPNNELLYVSKLKKPIYALPYL KSI GYQTVAMHNNYSYYNRNKVYP ELPGEKFIENMIAQKDRSNIFNQG GWATDDLIFDSIKSTL KENEQQPKFIYAITVENHPMYNDDRF GKQNYKFNKELSDTEKQKLSTYTAGTVRANQKLKELA EYLKTVDRPTILVAFGDHLPNLQEVYESY GFFKDDPERTSLKNYQTPFV VWSNYKLDKKPLKQP YIAASFVAPKLLKLAGLPLSDYYQFVDDVSSCYS AIHQKFINENPTCNFDK KVLKGYENLNKDV LDGHNHTYKIMQNNKEEMEQ                                                                                                                                                                                                                                                                                                                                                                                                                                                                                                                                                                                                                                                                                                                                                                                                          | 0.3462259 | 0.000362193 | down |
| A0A481WW07 | Wza                                                      | 53 | 15 | 35  | 4  | 41.2  | MHKGSRVKYQCFFSVLALSLSAASCAVTSGLQTYDIPSEGVYKTDLGTTVNVVKISQETLSAIQP AQIDYQRDYASLFKTQOSIYRLSPGDILSIQLWAYPEITPPVNGISSEQSIQANGYPIDQS YIQFPL VGRYKAAGKTLAQVNRELNHQLARFLKNPDVIVRVLSYEGQRFVQGSVTKGGQFYLSDGQFVSI YTALGMAGGVTTTGDNTYIQLIRNGRTYNLNTIDLEKAGYSLHKLLVQPNDTIYVSTRENQKIY VMGESGKNQALPMRDQGM TLDALGESLGINPLSGSSSRIYVVRTNPNDRTTEIYHLNLSIGDF GLANQFRLRSNDIVYIDATGLTRWQRVVNQHIFPSNALYNIDRLGQ                                                                                                                                                                                                                                                                                                                                                                                                                                                                                                                                                                                                                                                                                                                                                                                                                                                                                                                                                                                                                                                                    | 2.7377637 | 0.003436815 | up   |

|            |                                                                |    |    |     |    |      |                                                                                                                                                                                                                                                                                                                                                                                                                                                          |           |             |      |
|------------|----------------------------------------------------------------|----|----|-----|----|------|----------------------------------------------------------------------------------------------------------------------------------------------------------------------------------------------------------------------------------------------------------------------------------------------------------------------------------------------------------------------------------------------------------------------------------------------------------|-----------|-------------|------|
| A0A4P8VDY7 | Universal stress protein A family                              | 47 | 10 | 15  | 7  | 31.2 | MSKIIACIDGSLVTNTVCDYAAWFSDKLNSPIKLLHVIDKPKAKAPQDLSGAIGLGSRETLKELV<br>ELEERKGGKIELEHGQILLREAKNYLVEKFSIDAQSFQRHGSVLETIMGMEDDIRVLVMGKHGNET<br>EHDSSKIGTHIENVVRLHKPVLITSAFSPPKSFLIAFDGSGTARKCVERIASSPLKGLAVHLVY<br>VGNPNSEMQNQLSWAKEQLESQGFNITSNTLDGEVDKAIINYAEQHQIDLIVVGAYGHSKIRQFF<br>IGSTTTKVITSANKPVLLLR                                                                                                                                                 | 2.5441704 | 0.002200668 | up   |
| A0A4Q4H7V6 | 2-methyl-aconitate isomerase PrpF                              | 20 | 9  | 21  | 1  | 42.0 | MSFVVPQIKIPATYMRGGTSKGVFFKLLDDLPEKAQVAGQARDQLLLRVIGSPDPYGKQIDGMGGA<br>TSSTSKTVILAKSTQPNHDVDYLFQVVSIDQPFVDWSGNCGNLTAAVGSFAISNGLVDADRIPE<br>GLCTVRIWQKNIQKTHIAHVPIITNGQVQETGDFELDGVTFPAAEVQIEFLDPADDGEEGGDMFPT<br>GNVVDQLDVPPEIGSFQATFINAGIPTIFLNAEDLGYEGTELQDHINGDAAAALARFEKIRAYGAVQ<br>MGLIKDISEAAARQHTPKIAFVSKPKNYTASSGKNVSEKVDLLVRALSMGKLHHAMMGTAAV<br>AIGTAAAVPGTLVNLAAAGGEREAVRFGHPSGTLRVGAQAELETNGQVWVVKAIMSR SARVLM<br>EGWVRIPGDSF                 | 0.208348  | 0.010811004 | down |
| A0A4V5MUT8 | Isocitrate dehydrogenase [NADP]                                | 69 | 23 | 160 | 2  | 45.6 | MGYQKIVVPADGDKITVKADLSLNVNPHIIPFIEGDGIGVDITPAMKKVVDAAILKAYGGKRSIE<br>WMEVYCGEKANKIYGYMPEETFEALREFVVSIIKGPLTTPVGGGIRSLNVALRQELDLYVVCVRP<br>VRWFQGVPSPVQHPDLTDMVIFRENSEDIYAGIEWKADSEEAKKVIKFLQEEMGVTKIRFPEGCG<br>IGIKPVSKEGTQRLVRKAIQFAIDNDKPSVTLVHKGNIMKYTEGAFKEWGYELALDRFGGELIDG<br>GPWVKIKNPKNKGDIIIKDVIADAFLLQILMRPADYSVIATLNLNGDYISDALAAEVGGIGIAPGA<br>NIGGAIAYVEATHGTAPKYAGQDKVNPGSILSAEMMLRDMGWTEAADLIHKISGAIAAKTVA<br>YDFERLMPGATLLRCSEFGDAIIQHMED | 2.988667  | 1.14E-05    | up   |
| A0A517D2C4 | Two-component system response regulator PmrA                   | 37 | 5  | 28  | 5  | 25.5 | MTKILMIEDDFMIAESTITLLQYHQFEVWVNNGLDGLAQLAKTKFDLILLDLGLPMDGMQV<br>LKQIRQRAATPVLLISARDQLQNRVDGLNLGADDYLKIPYEFDELLARIHALLRRSGVEAQLASQ<br>DQLLESGDLVLNVEQHIAATFKGQRIDLSNREWAILPLMTHPNKIFSKANLEDKLYDFDSDVTSN<br>TIEVYVHHLRAKLGKDFILTIRGLGYRLGQS                                                                                                                                                                                                               | 4.236701  | 0.003257215 | up   |
| A0A5K1MHI6 | Uncharacterised protein family, zinc metallopeptidase putative | 57 | 9  | 27  | 1  | 33.0 | MRWRDRRVSTNVEDRRGGGGVRAGGSIIGLVVAFVAWKFFGVDPQAYQATQQVTAQQSN<br>ATAPESLTAEQKEASDFVGTVLADTEDTWTPIFKQLGKTYTPPKLVLFSGMIQSGCGTAQSAMG<br>PFYCPADQKVYIDTEFFKDMREQMGISGEQNTLSRQDQAGDFAQAYVVAHEVGHVHTLLG<br>ISSQVQARAQVSQREGNQLSVRQELQADCLAGIWANHNNQRTQFLEQGDVEEAMDAQKIGD<br>DYLQKRATGQVVLDSTHGSSEQRMHWFQVGLKTGDISQCDTFNNSI                                                                                                                                       | 5.5364372 | 4.05E-06    | up   |
| A0A5K1MJ17 | Outer membrane protein Omp38                                   | 46 | 17 | 358 | 2  | 38.5 | MKLSRIALATMLVAAPLAAANAGVTVTPLLLGYTFQDSQHNNGGKDGNLTNAPELQDDLFGA<br>ALGIELTPWLGFEAEYNQVKGVDVDGASAGAEYKQKQINGNFYVTSDLITKNYDSKIKPYVLLGA<br>GHYKYDFDGVNRGRTRNSEEGTLGNAGVGFWRNLNDALSLRTEARATYNADEEFWNYTALAG<br>LNVVLGGHLKPAAPVVEVAPVEPTPVAPQPQELTEDLNMLERVFFDNTKNSNIKDQYKPEIAKVA<br>EKLSEYPNATARIEGHTDNTGPRKLNRLSLARANSVKALVNEYNVDASRLSTQGFQAWDQPIA<br>DNKTKGRAMNRRVFATITGSRVTVVQPGQEAATPAAAQ                                                                  | 0.1738403 | 2.90E-07    | down |
| A0A5K1MJT9 | Flavoprotein-like superfamily                                  | 53 | 5  | 9   | 1  | 20.1 | MSNSNIAVVYFSGYGHTKVVAETFANEINAQLIQIDQEGNITDQDWETLNNAKGIVFGAPTYMG<br>TAPWQFKKFADATSKVWFTRGWQDKVAFAGTNSASLNGDKQVTLIQLQTLASQHGIIWVSLGL<br>LPANTKDATREDVNNLGGVGLLVQSPSDASVDEVPTGDLETAKVYAKRVQAIVNKIYG                                                                                                                                                                                                                                                        | 0.2540446 | 0.033508444 | down |
| A0A5K6CRD2 | (R)-benzylsuccinyl-CoA dehydrogenase                           | 59 | 19 | 43  | 19 | 45.9 | MFELSKKAQDFAERTKFKFIEEIEPVEAKFWEEVHELNPDGNWKKWQWPELLETLSKAKQAG<br>LWNMFLPDEKLGAGLSVQEYAHIAELTGRSLLAPTVFNCNAPDTGNMEVLWRYGSEQQKQW<br>LEPLLDGKIRSVFCMTEPDVASSDATNMQATALIDGNEIVLNGKKWSSGLGDPNAKVIIIFMAH<br>TPDETCDRHHQHSMVLVPIDTAGVEIQRMLPVFGDYDAPHGHGEVHFNNVRVPIENFIGGAGQG<br>FEIAQGRLLGPGRIHHCMRCIGAAEKALELMIDRGMRSRTAFGKEILKLGGNLNERVADARVAIDQA<br>RLLTLYAAYKMDTLGNMAALTEISAIVVAPSVLEKVVDMAIQLHGGAGVSRDTPLTGFFAQA<br>RSLRLADGPDEVHKGMIAKLELAKRGYFGRHKKV   | 2.8119316 | 1.42E-05    | up   |
| A0A5P1UPF1 | 1,2-phenylacetyl-CoA epoxidase subunit A                       | 31 | 7  | 16  | 1  | 35.6 | MENNYQKFEQNIANEITIEAKDQMPDAYRKTILIRIQGHGHSEIVGMLPEGNWITRAPTLKRKA<br>VLLAKVQDEAGHGLYLYSAAETLGADRDDMEKLNKMGKMYSSIFNYPTLTWADVAAGWL<br>DGAIVNQVALCRTSYGYPARAMVRICKEESFHQRQGFAMMALANGTPEQKQMAQDAVNRF<br>WWPALMMFSPDKHSPNSAQSMAWKIKRFSNDELQKFDVNTVPQVLLQGLEVPDPDLKFNE<br>ETGHYEFGEIDWHEFNEVIAGRGPCNHERIEARRKAWENKVVWRDAVVYAKKQQLANKVA                                                                                                                          | 3.5942695 | 0.046054207 | up   |

|            |                                                  |    |    |     |    |      |                                                                                                                                                                                                                                                                                                                                                                                                                                                                                                                                                                                                                                                                                                                                                                                                                                                                                                                                                                                                                                                                                                                                                                                                                                                                              |           |             |      |
|------------|--------------------------------------------------|----|----|-----|----|------|------------------------------------------------------------------------------------------------------------------------------------------------------------------------------------------------------------------------------------------------------------------------------------------------------------------------------------------------------------------------------------------------------------------------------------------------------------------------------------------------------------------------------------------------------------------------------------------------------------------------------------------------------------------------------------------------------------------------------------------------------------------------------------------------------------------------------------------------------------------------------------------------------------------------------------------------------------------------------------------------------------------------------------------------------------------------------------------------------------------------------------------------------------------------------------------------------------------------------------------------------------------------------|-----------|-------------|------|
| A0A646MCI5 | Phage capsid protein                             | 18 | 4  | 7   | 1  | 33.3 | MTTTVNSDMIYNQLAQTAYLERLQDNLNVFNQASNGAIVYRNEIIEGDFNKEAFYKVGGSIKH<br>RDVNSIAKVVPEKIGSGESVGVKVPYKYGPYASTEAEFKRRARTPEEFAMILGYDLADALVAGR<br>LQYSLASLKAAISSNPDMMVAKGSAIVDGRKALTRGMRFKFGDKFGRISLWVMNSDTYFDIVDDAI<br>TKQIYGESEIVYGGPLPGTLGKPVLVTDVAVGDDDAFGLQMGAVTVTESQVPGFRAYDINDEENL<br>GIGMRAEGAFNLDILGYSWDTSKGENPDLTLGSSANWKKHATSNKMTAG<br>MFQHIPPYAGDPILSLMEQFNADTRSEKVNLSIGLYYNEDSIVPQLETIIIEAQKRIEKPNGKTKLYL<br>PMEGFKPYREAIQALLFGVNSPAVKAGRAVTIQTLLGGSGALKVVGADFLKTYFPNSDVVWSQPT<br>WDNHVAIFNGAGIKTHFYFYFDAETRGVDFDGMSTLTKLTPEQSIVLLHPCCHNPTGADLNPAQ<br>WDQVIAVLKDRNLIPFLDIAYQGFQDGMEDDAYAIRALDQAGLNFIVSNSFSKIFSLYGERVGG<br>TFVCDDEAAQCTFGQLKATVRRYSSPPTTGAWL VDEVLNDAELNQQWQGEVKEMRERIIKM<br>RSILKDELTKALPDRDFSYLVNQKGMFSYTGTLTAEQVDILREEYAIYLVRSGRICVAGLNMNNV<br>YTVAKAMAEVLAKSVEAA                                                                                                                                                                                                                                                                                                                                                                                                                                                                                        | 3.0290224 | 0.001153574 | up   |
| A0A654KV19 | Aminotransferase                                 | 68 | 17 | 114 | 1  | 44.9 | MNEFFNGPRGAQFDAMYYWDQFHPILAAIVILLVGVHIALVAAGVKLLQKVNTNAKLSSATG<br>RTPNIEGLISKVVFWFILILAVVAALNVLNISGVSGPFSNMVNQVLVYIPNIIAAVVVGFQWVAR<br>LVRAGVTNVLRTQLDDKLSSEVGVGGISQNGEILYWLVLFLPIVLSILGLTGLLIPVQMN<br>DAVAFLPNIFIAGVIVFVGYLAKIVRGIVEGLINSLGVQSAEKIGLFKNSNVGKFLGSFVFAIIIT<br>TLIVAFEALGIETISQPATAMLNEILQAIPNIIAAGLILLVAYIVSRFVGRVLVAELIAGTVGDEIPAKL<br>DVQRFGLGQTKVSNVAVGWLVIVFTMLFAVSEAADRLGFDQISGLIAMFIHFGANILLGAVILVIGF<br>WLANVVANVVQRGEYNSRWLGLSLVRVLIIGLVLALGLRAMGIADSIVNLAFLTLGAVAVAF<br>ALAFGLGGRQPAERLLSDLLDKAKKEASQPNPLYQPPTNNTTGSSTTVSTPTTTTAPSTTVSS<br>DAKPADSAQVNSQPPVKNKPFGSTGENDEI                                                                                                                                                                                                                                                                                                                                                                                                                                                                                                                                                                                                                                                                            | 9.1141835 | 1.02E-05    | up   |
| A0A654KWM6 | Small-conductance<br>mechanosensitive channel    | 17 | 8  | 55  | 8  | 59.1 | MGWEIPIHFRVNGEPRVLAYLKPBASEAYTEELSYVYDVLNDELNEYFNDEFTYNSNELRLF<br>YLQRPAAEFILWHPDQVHNQEIQIFVYGVGIPNANRLTTIDIPEIPESPFHIFWDKTEDQ<br>MAGQIVLKSQNAIDNLADLPDINYINRVKADGGVIYNMNALLDVFAFIYSKNITDSEVFSAINP<br>AWGVKYDPATGNISKLYSLFDPAGDLNFAFGSLPIKLQNDLGVPSAYLGGSQNTYLKAAAGTVSG<br>VETIGYATAAVIPQLSNYGAGAGTNPFLGLLWSREAHDAADPVGSVTPYVAASWYVGRPDTNSI<br>TLSQWTEYFVSFSSTGSAGSNALTYENAKPLSAFADTGGLRVYKNGLQVLFVLDSTVTQTPIHKD<br>KLELLIGATVTGTGAPATTYFLGHFIENWVVLVNTASEKMIEISKRINDKYAVIPH<br>MKNLITIAFLLLAGCSTQKQPQSEPPYVKQNYSESDPAAKLSVVSQFAGVVKSIYPAYQISHSND<br>GSEVKFLPNVVKADTKFMPNWNWYSIKIIEKPTENWKGILVEVENKGSFGESKAVAAKDCQKI<br>FGNIDNRVPAVLYDLENRLNQSPNASISNRQYGYTFHLDASHYNQGYPVTCMVSN<br>MLNFFSTLRNKQISLFMFNLIJAIWLGAILNIGFYHQVHTLTPYFGVKAILFLAATLILVATYYAV<br>LQILNWKWTAKIFAILLIFIGGSSYFVNTLGVIIISPDQIQNMVQTDVSEVTDLISLRFVLWTFI<br>LPIFLITQVKFKQEKVSRLLKVKVSLVASLAVVGVLLFTYYVDFAAIFREHRDLKGMISPNQSSISS<br>LMSYYHKKAPKKNLPLVIYQDAHQVQVQKQNLKMLVVGETAARESFSLNGYAKNTNPEL<br>SKQDIFNFSQVSSCGTATAVSVPCMFSGMPRVDYDEQLASHREGLLDIAKRAYQVTWIDNNSG<br>CKGACDRVEQYQIPENLKKKWKGDGECYDDILDSLKQYLSIAKDDDRPRLIVLHQVGSHGPA<br>YYKRAPEAYQPFKPTCDTNAIQGCSQTELLNSYDNTIVYTDHVLSQMINTLKEISKYQTGLWYLS<br>DHGESTGEHGLYLHGSPYAIAPSQQTHVPMIMWFSESWKQHNLAQVNCLSQQTQKQLSQDNL<br>PSLLSLLDVTTQVINPQLDMLHSCAHVN | 2.0611001 | 0.008026215 | up   |
| A0A654L2G6 | Uncharacterized protein                          | 16 | 1  | 4   | 1  | 14.8 | MISLITATYNREKLLKLYESLCVQTVKKFEWIVDDGSIDKTDELINSFKLDNIIDITYLKKNTGG<br>KHTAMNIGVEIAKYAYVFFIDSDDFLPNDSIEKIINYIDKVSAREDYSEISGVCGLIADFGQNLIGT<br>KYSENLCSSYIDRYKYHIKGDKAEIFKREVLLYKFPVIEKEKFCPEALVWNRISDKYKMYFFN<br>EVIIYREYLEGGLSDRSVIEIRKKAISTLLYYKELYLNKLNWYRIRAYINMYRKFIS<br>MRILYVITGLGGGAEKVVCDLADEMCSRGHVIAIYKGEIVVFPKNKEIELVYLGLESILNALS<br>FFRNYRDLIISFTPDVVHSHMVHANIFTRISRFYSIPKLICTAHSSNEGSKFRMLAYNFTHNLADL<br>TTNVSLEASRNFEIRKGVKGGIRTINYNGIDLKFKISPLNKDKIKNNLGIENGIPIFIAVGRFHEAK<br>DYPNLINAFRIFKTKIIHNSQDNNLPILLIVGDGELKSEVELLIESFNLDKNIKLLGRRNDIPDLLNIA<br>DYFILSSKYEGLPVIMEAMACETTFVISTNCSGVEIMNDTGIMVPICDSEALAEGLIKAYNLSPK<br>EIELNLSARRRIEKIFSLEKSIETWLEIYES                                                                                                                                                                                                                                                                                                                                                                                                                                                                                                                                                                                                    | 0.2491475 | 0.00720467  | down |
| A0A654L2Q2 | Uncharacterized protein                          | 12 | 2  | 2   | 2  | 33.4 | MAKILVTGGAGYIGSHTCVELLEAGHEVIVFDNLSNSSKESLNRVQEITQKSLTFVEGDIRNSGEL<br>DQVFQEHAIDAVIHFAGLKAVGESQEKPLIYFDNNIAGSIQLVKSMEKAGVYTLVFSSATVYDE<br>ANTSPLNEDMPTGMPSNNGYTKLIVEQLLQKLSVADSKWSIALLRYFNPVGAHKSGRIGEDPQ<br>GIPNNLMPPYTVQAVGRREKLSIYGNDYDVTVDGTGVRDYIHHVVDLASAHLCALNNRQAQGC<br>AWNIGTGNSSVLQVKNTFEQVNSIPVAFEFAPRRAGDVATSFADNARAVAEGLGWKPQYGL<br>MLKDSWNWQKHNPNTGYKR                                                                                                                                                                                                                                                                                                                                                                                                                                                                                                                                                                                                                                                                                                                                                                                                                                                                                                         | 0.4055468 | 2.95E-05    | down |
| A0A654L9F1 | Lipoprotein                                      | 49 | 8  | 11  | 8  | 20.5 | MISLITATYNREKLLKLYESLCVQTVKKFEWIVDDGSIDKTDELINSFKLDNIIDITYLKKNTGG<br>KHTAMNIGVEIAKYAYVFFIDSDDFLPNDSIEKIINYIDKVSAREDYSEISGVCGLIADFGQNLIGT<br>KYSENLCSSYIDRYKYHIKGDKAEIFKREVLLYKFPVIEKEKFCPEALVWNRISDKYKMYFFN<br>EVIIYREYLEGGLSDRSVIEIRKKAISTLLYYKELYLNKLNWYRIRAYINMYRKFIS<br>MRILYVITGLGGGAEKVVCDLADEMCSRGHVIAIYKGEIVVFPKNKEIELVYLGLESILNALS<br>FFRNYRDLIISFTPDVVHSHMVHANIFTRISRFYSIPKLICTAHSSNEGSKFRMLAYNFTHNLADL<br>TTNVSLEASRNFEIRKGVKGGIRTINYNGIDLKFKISPLNKDKIKNNLGIENGIPIFIAVGRFHEAK<br>DYPNLINAFRIFKTKIIHNSQDNNLPILLIVGDGELKSEVELLIESFNLDKNIKLLGRRNDIPDLLNIA<br>DYFILSSKYEGLPVIMEAMACETTFVISTNCSGVEIMNDTGIMVPICDSEALAEGLIKAYNLSPK<br>EIELNLSARRRIEKIFSLEKSIETWLEIYES                                                                                                                                                                                                                                                                                                                                                                                                                                                                                                                                                                                                    | 0.20581   | 0.004263857 | down |
| A0A6B2QRH5 | Phosphoethanolamine--lipid A<br>transferase PmrC | 23 | 11 | 47  | 1  | 62.2 | MAKILVTGGAGYIGSHTCVELLEAGHEVIVFDNLSNSSKESLNRVQEITQKSLTFVEGDIRNSGEL<br>DQVFQEHAIDAVIHFAGLKAVGESQEKPLIYFDNNIAGSIQLVKSMEKAGVYTLVFSSATVYDE<br>ANTSPLNEDMPTGMPSNNGYTKLIVEQLLQKLSVADSKWSIALLRYFNPVGAHKSGRIGEDPQ<br>GIPNNLMPPYTVQAVGRREKLSIYGNDYDVTVDGTGVRDYIHHVVDLASAHLCALNNRQAQGC<br>AWNIGTGNSSVLQVKNTFEQVNSIPVAFEFAPRRAGDVATSFADNARAVAEGLGWKPQYGL<br>MLKDSWNWQKHNPNTGYKR                                                                                                                                                                                                                                                                                                                                                                                                                                                                                                                                                                                                                                                                                                                                                                                                                                                                                                         | 5.5380995 | 7.34E-06    | up   |
| A0A6B9KPL0 | Gtr89                                            | 60 | 14 | 37  | 14 | 30.8 | MISLITATYNREKLLKLYESLCVQTVKKFEWIVDDGSIDKTDELINSFKLDNIIDITYLKKNTGG<br>KHTAMNIGVEIAKYAYVFFIDSDDFLPNDSIEKIINYIDKVSAREDYSEISGVCGLIADFGQNLIGT<br>KYSENLCSSYIDRYKYHIKGDKAEIFKREVLLYKFPVIEKEKFCPEALVWNRISDKYKMYFFN<br>EVIIYREYLEGGLSDRSVIEIRKKAISTLLYYKELYLNKLNWYRIRAYINMYRKFIS<br>MRILYVITGLGGGAEKVVCDLADEMCSRGHVIAIYKGEIVVFPKNKEIELVYLGLESILNALS<br>FFRNYRDLIISFTPDVVHSHMVHANIFTRISRFYSIPKLICTAHSSNEGSKFRMLAYNFTHNLADL<br>TTNVSLEASRNFEIRKGVKGGIRTINYNGIDLKFKISPLNKDKIKNNLGIENGIPIFIAVGRFHEAK<br>DYPNLINAFRIFKTKIIHNSQDNNLPILLIVGDGELKSEVELLIESFNLDKNIKLLGRRNDIPDLLNIA<br>DYFILSSKYEGLPVIMEAMACETTFVISTNCSGVEIMNDTGIMVPICDSEALAEGLIKAYNLSPK<br>EIELNLSARRRIEKIFSLEKSIETWLEIYES                                                                                                                                                                                                                                                                                                                                                                                                                                                                                                                                                                                                    | 0.1938871 | 0.015338432 | down |
| A0A6B9KQE9 | Gtr93                                            | 19 | 7  | 9   | 7  | 41.4 | MAKILVTGGAGYIGSHTCVELLEAGHEVIVFDNLSNSSKESLNRVQEITQKSLTFVEGDIRNSGEL<br>DQVFQEHAIDAVIHFAGLKAVGESQEKPLIYFDNNIAGSIQLVKSMEKAGVYTLVFSSATVYDE<br>ANTSPLNEDMPTGMPSNNGYTKLIVEQLLQKLSVADSKWSIALLRYFNPVGAHKSGRIGEDPQ<br>GIPNNLMPPYTVQAVGRREKLSIYGNDYDVTVDGTGVRDYIHHVVDLASAHLCALNNRQAQGC<br>AWNIGTGNSSVLQVKNTFEQVNSIPVAFEFAPRRAGDVATSFADNARAVAEGLGWKPQYGL<br>MLKDSWNWQKHNPNTGYKR                                                                                                                                                                                                                                                                                                                                                                                                                                                                                                                                                                                                                                                                                                                                                                                                                                                                                                         | 0.2374266 | 0.021794684 | down |
| A0A6B9KZP3 | UDP-glucose 4-epimerase                          | 45 | 14 | 57  | 2  | 37.2 | MAKILVTGGAGYIGSHTCVELLEAGHEVIVFDNLSNSSKESLNRVQEITQKSLTFVEGDIRNSGEL<br>DQVFQEHAIDAVIHFAGLKAVGESQEKPLIYFDNNIAGSIQLVKSMEKAGVYTLVFSSATVYDE<br>ANTSPLNEDMPTGMPSNNGYTKLIVEQLLQKLSVADSKWSIALLRYFNPVGAHKSGRIGEDPQ<br>GIPNNLMPPYTVQAVGRREKLSIYGNDYDVTVDGTGVRDYIHHVVDLASAHLCALNNRQAQGC<br>AWNIGTGNSSVLQVKNTFEQVNSIPVAFEFAPRRAGDVATSFADNARAVAEGLGWKPQYGL<br>MLKDSWNWQKHNPNTGYKR                                                                                                                                                                                                                                                                                                                                                                                                                                                                                                                                                                                                                                                                                                                                                                                                                                                                                                         | 0.3080406 | 0.018931692 | down |

|            |                                                                         |    |    |     |   |      |                                                                                                                                                                                                                                                                                                                                                                                                                                                                                                                                                                                  |           |             |      |
|------------|-------------------------------------------------------------------------|----|----|-----|---|------|----------------------------------------------------------------------------------------------------------------------------------------------------------------------------------------------------------------------------------------------------------------------------------------------------------------------------------------------------------------------------------------------------------------------------------------------------------------------------------------------------------------------------------------------------------------------------------|-----------|-------------|------|
| A0A6F8TC76 | Oxidoreductase                                                          | 60 | 7  | 21  | 2 | 17.5 | MLNTALPVLKYDGTIADNTYQIIAEDGVIPRGDVVLTTAQLDQLANIQGGKALYVTVNDSPEHD<br>TFPLSELDAIFIEFAGFDGGRGYSFAALLRRQFGQELRATGDVFKDVLNLYLKRSGFDSFVIKEGK<br>DVQEAAAAGLQDFTHPYQASTAVPKASYQTGA                                                                                                                                                                                                                                                                                                                                                                                                       | 0.19412   | 0.028246243 | down |
| A0A6F8TGE6 | Uncharacterized protein                                                 | 17 | 1  | 3   | 1 | 5.2  | MKLLALVSMGVAASYWYKTIKDKSKPTLLKPNFDEIVKNFVIAEFKV                                                                                                                                                                                                                                                                                                                                                                                                                                                                                                                                  | 3.3954011 | 0.006753311 | up   |
| A0A6H2UPY5 | Sel1-like repeat                                                        | 52 | 12 | 16  | 1 | 29.6 | MKRLLIASLIAISSSSIFAADTTTSAAKNDVFKQAEQLYAAKNYPAAFQEVQRLAQTGNAQAIYN<br>LGYMTQMGQGTAKDNAKALKYYEDASNKGYAQASYTLAQIYETGELGVAKDSNKFQYIYQKA<br>AAQGSDDATVKIATILFAQKKPQSHQIALQKLAPLIRKGNYPYAIQVKALYDISQGVENKNPLMKR<br>QGIEALQTIAQKGYAPASMALATMMANGNIIPQNLPAQAKQIFTELAKQVNPNAESLASVEKIIA<br>EKNKQAAAAPTQPAPKK                                                                                                                                                                                                                                                                              | 0.4314752 | 0.045043046 | down |
| A0A6H3SV37 | Glutathione peroxidase                                                  | 83 | 12 | 98  | 1 | 20.2 | MTQSVYHIPVKAISGETVDLDQYKGVLLIVNTASKCGLTPQYEGLEKLYQAKKDQGLEILGFP<br>ANNFKEQEPGSDEEIQFCSLNVDVHFLPFSKISVAGEDKHPLYQVLTTAQPERIGEGPFRERLEG<br>LGIPTNPAPPEVLWNFEKFLINKNGEVVARFAPNLTADDEQIVKAVEAELAK                                                                                                                                                                                                                                                                                                                                                                                     | 0.2243731 | 0.008896651 | down |
| A0A6H3T2F1 | HTH-type transcriptional regulator with aminotransferase domain         | 4  | 2  | 3   | 1 | 54.0 | MTFQYQVLANQLAHRIYQDELKPHQKLISLRDFARQHGISLSTAKSCYELLEARGLIYVVKPKSGY<br>FVVARTPSSPIPDSPDFLSLPRHVSNLELHNQIEAALQSHLVPLGSIQLTPHFIPVEGLRRSIQRAL<br>KNCQPQDFLYCNKQGHEQLRKALSDHWREDGIYIAPEDIFITNGCMPALSLVIQKLETVGDSILIP<br>TPTYNGHLQLLASLKRQIVEIPADHRGIDLERLESLMQGLAKVCLMTANYQNPLGYCFNSNTEK<br>QKIVELAAYQCFIIEDIFGEGCYSSERPLPIRYWDREGYVIWCGSVSKSLSSAYRVGWFLTK<br>LEHLKLELLVSNIGVNTPLQLGLADFIYSRAYREHLEQLRPNLMRQVEEYRSCILRAFEGPIALSQ<br>PEGGYALWIQLPKSVDSLALYYTAQAQGITVVPGHVFGEDERYRHFIRLNAGHELTAADRQAIM<br>SLADWSRQQMQTVS                                                                | 2.1376865 | 0.02369312  | up   |
| A0A6H3T3L2 | Tetrahydrofolate dehydrogenase/cyclohydrolase                           | 73 | 14 | 69  | 2 | 29.7 | MALVLDGRALAKQIEENLLVRVEALKAKTGRTPILATILVGDDGASATYVRMKGNCARRVGM<br>SLKIELLQETTTEQLLAEIEKLNANPDVHGILLQHPVPAQIDERACFDAISLAKDGDVGTCLGFR<br>MAMGEAAYGSATPAGIMTILKENNIEIAGKHAVVVGRSAILGKPMAMMLLQANATVTICHSR<br>QNLPELVKQADIIVGAVGKAELIQKDWIKQGAVVVDAGFHPRDGGGVGDIQLQGIEEIASAYTP<br>VPGGVGPMITITLIRQTVEAAEKALG                                                                                                                                                                                                                                                                          | 0.4573897 | 3.31E-05    | down |
| A0A6H3T9J1 | Phosphoadenosine phosphosulphate/adenosine 5'-phosphosulphate reductase | 73 | 13 | 42  | 1 | 27.5 | MTVIPTIDIVDALAAEYAAKSPREILDALSQQGEIAISFSGAEDVVLIDMASRLGKPFVFLSDTG<br>RLHPETYQFIETVRKHYNINIEICFPDAEAVQSMVNEKGLFSFFKDGHQECCGIRKVQPLRKKLAT<br>LDGWITGQRKDQSPGTRTEIPVQADAGFSGPGKQLIKYNPLANWSSADVWSYIRMMEIPYNPL<br>HERGFVSIGCEPCTRPVLPNQHEREGRWWWEEATQKECGLHAGNLKK                                                                                                                                                                                                                                                                                                                    | 2.7158473 | 0.000172013 | up   |
| A0A6H3TEL8 | Lipoprotein                                                             | 17 | 2  | 5   | 2 | 11.7 | MKKLSTILTAGVLAAMLSVSAFACPKGTQLQGGTGPNHKGKGCVAVHGKATAQKAKKEATKTK<br>QEVKDKLTMQKHDAMTSATHAQHESHQMTHQMKQGAVKTANTAKAATKP                                                                                                                                                                                                                                                                                                                                                                                                                                                             | 2.0935425 | 0.021494633 | up   |
| A0A6H3UE57 | Winged helix DNA-binding domain superfamily                             | 16 | 4  | 8   | 4 | 36.1 | MKKDLVVKDNALINASYNLDLAEQRLILLAILEARESNTPSDRDLTIHAESYINHFNVHRNTAYK<br>VLKDACKNLFERRFSYQKLTAKGNLENVMSRWVQRVSYVENEALVRIRFSDDVAPLITNLEKHF<br>TSYELEQVSSLTSAYAIRLYELLIAWRSTGKVSMLTEKELRSRLGVSDTEHQRMESFKRRVLEPAI<br>QQINDHTDIKAEYEQHKRGRSIVGFSFSFKQKSKPKTINHERDPSTVDMFCNLSDSQINTYSSILSK<br>VHSISDLAGNKDYQAFAIWIANILRDPTSVREETAKRIFKALRTETDFKG                                                                                                                                                                                                                                         | 0.1887928 | 0.003349216 | down |
| A0A6I4HS79 | Aminotransferase                                                        | 70 | 30 | 213 | 1 | 59.7 | MGKVDYSKYAKLSPFELKDNLELAQSKTDRIMLNAGRGNPNFLATIPRRAFFQLGLFSATESEFS<br>FSYMPEGLGGFPRTVGLQSRFDNFILNRDKPGVVFLGKAVSYVRDQLGLDPLFLEMVEGILG<br>CNYVPDRMLRVSETIIEKEYVLRMGVQGMQKRDLDLFAVEGGTAAMAYIFNSLKENKIKNGD<br>RIAIGSPIFTPYLEIPKLNQYQLEEVLEADPKLGWQYPESELRKLEDPKIAFFLVNPSNPPSVKMS<br>DEGLAILADIVKRPDLIILTDVVYGTADFNFKSLFAICPDNTILVYSFSKYFGATGWRLGVIALSN<br>NNVLDKQIANLSKKEKKELEDREYSSLTTPASIKFIDRLVADSRNVALNHTAGLSTPQQVQVMVLF<br>ALFNMMSDRQSYKKAVKSVVRRERDAALYRQLGVDVPTDPNAVYDYYTLVNLENTSRTLYGDEF<br>ADWVMKNKNPTTELLFRVADETGVVLLPGSGFGVQHP SARASLANLNEYQYAAIGESLRRFADE<br>AYA EYTKKKIK | 0.4772167 | 0.04313485  | down |
| A0A6I4HT95 | Uncharacterized protein                                                 | 46 | 5  | 9   | 5 | 16.5 | MKNYILIFIGALIAICSDKGTDKNQHNSNHKLDVVQTETNKSQSVVGENQENTDKMVKTKEAD<br>QVAQFSCSNPNITQWYGFNENIAEPKCEVVKNFQLTAYKCDISKNAFGASKDAILLENQDKRIFV<br>YSTSKDCNEMLEVRNANAP                                                                                                                                                                                                                                                                                                                                                                                                                      | 2.0568558 | 3.91E-06    | up   |
| A0A7L9DUK6 | Protein of unkown function DUF2303                                      | 42 | 8  | 16  | 1 | 30.0 | MSEKIEIEKFLGLAKPVIPLERGLVALHHDYSVIAAEKFMDFRPHGEFTTPTFNDFKDFVVA<br>EGKDTPIFVNQNDMKAIAVLNFHGEQQTQGHCDYLASLCLESTVVWKKLNQLKDKHLDQRN<br>FAVFIEDWAQVLNAFDENNNNAIDIKDALVAVRNMQIEASTTSNAEVENRQVQSEMAQIAASAK<br>KGVLPAYFTIQDSAYLGLAEREIKRLRIVNSTGSTPQFAIQIVKEELLRNEIHEDFKEEVIALLPENP                                                                                                                                                                                                                                                                                                      | 0.4585165 | 0.004436792 | down |

|            |                                                                         |    |    |    |    |      |                                                                                                                                                                                                                                                                                                                                                                                                                                                                                                                                                                                                                                                                                                                                                                                                                                                                                                                                                                                                                                                                                                        |           |             |      |
|------------|-------------------------------------------------------------------------|----|----|----|----|------|--------------------------------------------------------------------------------------------------------------------------------------------------------------------------------------------------------------------------------------------------------------------------------------------------------------------------------------------------------------------------------------------------------------------------------------------------------------------------------------------------------------------------------------------------------------------------------------------------------------------------------------------------------------------------------------------------------------------------------------------------------------------------------------------------------------------------------------------------------------------------------------------------------------------------------------------------------------------------------------------------------------------------------------------------------------------------------------------------------|-----------|-------------|------|
| A0A7L9DVL0 | FAD/NAD(P)-binding domain superfamily                                   | 62 | 23 | 81 | 23 | 48.6 | MDIAIIGSGMAGLAAARILKDAGHTITIFEALPGRGMDSHSIEFDGGIHDAPLRVMNPHLWKNTLS<br>LAAHLGIKTFPVRTYMSCSWLFDREDTETWLTTSRSRIGNFPIINNRKGIQQYGWRLVKGMLQLKT<br>AIHQFFKSKNQDITLAEFINQNDIEEVFWHGVVMPVLYTICTCNPKTIGDWPAKNLLEFLRHLLTD<br>GDMLLRMKGGTPAFVDSLKIGIDIHSGSAIKKVELQGEKVLVENEKGDQGTDFRVIVATPTSKLE<br>EFLNPEQFAEDMNLKQFRFEQGDVLIHTDATVMPPRRKDWSVLSYMMDRKFTRQQFTVWMN<br>AVEPSLVGKNPVFQTRWPVVDIDPKKVISKVTLTRAVVDSQTIALNKELQQRHLQPNRKVFYCG<br>SWSCDGLPIESAVTSAMHIAEILGAPLPFVGLKPKVEVAPELGY                                                                                                                                                                                                                                                                                                                                                                                                                                                                                                                                                                                                                               | 0.4645246 | 1.50E-05    | down |
| A0A7M3FN66 | DNA-binding protein H-NS-like, C-terminal domain                        | 61 | 6  | 33 | 5  | 12.2 | MSQISELSIEELKDLQLEAAKLIEIKKEQAIEDAYLKIISAESVGYSVEDLLKVGAAANSKKKARKS<br>VKPRYRSKANEQDWTWTRGKQPRWLVAEIEKGAKLEDLRIN                                                                                                                                                                                                                                                                                                                                                                                                                                                                                                                                                                                                                                                                                                                                                                                                                                                                                                                                                                                       | 0.2489345 | 0.012158484 | down |
| A0A7M3FNP5 | Uncharacterized protein                                                 | 13 | 1  | 1  | 1  | 8.9  | MSNVDPQLEHVDPAAHPAADAYMRVLNCKSNYVNILAGWFLKDGKKKFYIADVRGNEVEAGF<br>NRDLWLTTFDITYKGGK<br>MTTLTCFKAYDIRGKLGTELNEEIAAYKIGRAYGQIYKPKTVVVGCDIRLSSEALKQATIRGLNDA<br>GVNVLDLGMTGTEEVYFAAFHLDVQGGIEVTASHNPMDYNGMKLVRENARPISADTGLKEIQ<br>LAETNNFEEVSQKGTTSYNIPEFVDHLLTYIEPTKIRPLKLVNAGNGAAGHVIDAIEEKFKAL<br>NVPVEFIKIHHEADGTFPNGIPNPILIENRDSTRNAVLEHKADMGIAWDGDFRCLFDEKGGQFIE<br>GYIYVGLLAQAFLIKSGEKIVHDPRLVWNTFDIVDEYKGVAVQSKSGHAFIKDVMREHNAVY<br>GGEMSAHHYFRDFAYCDSGMIPWLLTVALLSETGQSLSTLVENMITKFPCSGEINFKVADTQITI<br>QKIFDFYAAQNPEIDRTDGVSLDFGAWRFNVRASNTEPLRLNIESRADRQAQPMQYVDELTS<br>----<br>MTTIYLVRHGQASFGKSNYDELSENGEAQATLLGQYFKKILKEQYVAVAGTMQRHEQTAQLAL<br>KECFPDAVIHHNNLWNEFNHQYVFARYETRFEQPELLKADVAKHEHNPRAYLAKIFEGAIERWTD<br>GDFHHEYDESWPHFKERVETALQQLCDELAKTKPRYAVVFTSGGVISVAIGKLELSPNRTFAL<br>NWAITNTSLTTLRLVGNQAQVLSLNEHHFIKAEHPDLLTWI                                                                                                                                                                                                                                                           | 0.4801587 | 0.004361998 | down |
| A0A7S8F867 | phosphomannomutase                                                      | 46 | 19 | 57 | 2  | 51.0 | MNNVAQTNDSEVKAENDAVNTNSNETKAKDESGNIEDYLSPKGKLAQRKEQMKRELELLDE<br>QIAQEVEQAKLKVKDDLKLLDRNKLEISPKVWKKHMDIKKILLG<br>MKKELVVKDNALINASYNLDLSEQLLILAILEARQSNTPNDKDLTIHAESYINHFNVHRNTAYK<br>VLKDACKSLFDRRFYQKLTQKGNIEVISRWVQRISYVENEALVRIKFSDDVPLITNLEKHFTS<br>YELEQVSSLTSVYAIRLYELLIARWSTGKVTMVELEELRLKLGIEPNEYKRMGQFKEKVLHLAID<br>QINKYTDIKAEYEQHKRGRSIIQFSFKFKQKQPKKLDKSRDPNTPDFIRMTDAQRHILFGNKLA<br>HDARVQSEYSHLIGTGSYEDFAKLLADMLAEEQHFKMFYPLLVEHGYKA<br>MLNTALPVLYKDGTIADNTYQIAEDGVIPQGDVVLTTAQLDQLANTQGKKALYVTVNDSPED<br>HTFPLSELDAIFIEFAGFGDGRGYSFAALLRRQFGQGELRATGDVFKDVLNLYLKRSGFDSFVIKEG<br>KDVQEEAAAGLQDFTHPYQASTAVPKASYQTGA<br>MAKNASSPGKRFMKLAGMTASIAKTVNSIRNLTADDEEQKLAAKTKLFQDIGLQIADTLGEMK<br>GAVMKVQIASQYKDIFPPEVAKAISKLQRQAPAMPFAAIQQQVERELGKPLNVAFKSFQEPEFA<br>AASIGQVHKAVLPSGEQVVVVKVQYPGVDEACESDLKQVRLALRLMGVLKIDKKLQDQLFAEIQ<br>DLSLAELNYEIEAQNLVFKTFHSHKLDKIIIPTVYKDYSSRRILTSLEQGDSIETASSWPIERNTI<br>GRRILRALGQEMFFLKRFDHCPHGNFAFRQDGSVIIYDYGSVKTLNEIVYSFKRLVNAARHEDI<br>DLIETELLEHLHSLAEKGFPSDLYKLWIEVLLRPLTTTTYDFAENSSHHDGMLLVKKSLEYWVDF<br>KPSPDTLMVNRTISGHYWNLIHLKVHDNLDLFEELVPPSN | 0.1331234 | 2.80E-06    | down |
| A0A7S8WB40 | Histidine phosphatase family protein                                    | 28 | 6  | 14 | 6  | 26.7 | MSYQKLSRDQIAQLVAQDIPDGAYVNLGIGLPTKIASYLPADKDVFLHSENGLLAFGPPPAAGEE<br>DPELINAGKEFVTMLEGGSFFHHGDSFAMMRGGHLDIAVLGAFQVAANGDLANWHTGAPDAIP<br>AVGGAMDLAVGAKKVFITTDHITKQGEKIVAEITYPVTKGKHCVDRIYTDLCVIDVTKDGLKVI<br>EKVEGLSFDELQALTGATLIDATQG<br>MKKISLVIAASTMSLSVFAATPITNKSPAKDQFSYSYGYLMGRNNTDALTDLNLDFYQGLQEGA<br>QNKTARLTDEEMAKAINDYKKTLEAKQLVEFQKQGQNAQAGAFLAENAKKSGVITTKSGL<br>QYQVLKEGTGKTPKATSRVKVNYEGRLLDGTVPDSSIARNHPVDFQLNQVIAGWTEGLQTMKE<br>GGKTRFFIPANLAYGEVAGDGTIGPNSTLIFDIELLQVLPK                                                                                                                                                                                                                                                                                                                                                                                                                                                                                                                                                                                                              | 2.0659071 | 0.008108107 | up   |
| A0A7S8ZW13 | Uncharacterized protein                                                 | 46 | 4  | 12 | 4  | 12.5 | MIVSVTQDSREFNINILKAKRNNEAPFKYWLENVLKRGDILPRGKFFKGTAGKPIWVTDEFWM<br>HREDDIFTSNFIVPPARYGLSIFSEGEAEHFMVLTTRRGRNYESSDD                                                                                                                                                                                                                                                                                                                                                                                                                                                                                                                                                                                                                                                                                                                                                                                                                                                                                                                                                                                     | 0.2143468 | 0.006317437 | down |
| A0A7S8ZW19 | Replication initiation protein                                          | 15 | 3  | 5  | 3  | 36.3 | MSVIDRAVEKNANLSYVALKVIECFKADAGLDLNYIDDKISEFSDLSNYAALHQUALRILDDKNINR<br>LADKLGVSISDLETLTFLVNLKI<br>MQLNHYLNFQGGQAEQAFNFKYSVFGGEFAMLSRYSDMPPHDGVTLSEAQKNLVLHVSLPINEY<br>TVLMSDVIDQFCTPNSVFTQGNNHYIAINLEKDEQEAKQLFDALSUNGKIEMPLEKTFWGAL<br>YGAFTDQFGVKWMINCLD                                                                                                                                                                                                                                                                                                                                                                                                                                                                                                                                                                                                                                                                                                                                                                                                                                             | 0.2735039 | 0.008604104 | down |
| A0A7U3Y2S3 | Uncharacterized protein                                                 | 60 | 6  | 21 | 1  | 17.4 | MSYQKLSRDQIAQLVAQDIPDGAYVNLGIGLPTKIASYLPADKDVFLHSENGLLAFGPPPAAGEE<br>DPELINAGKEFVTMLEGGSFFHHGDSFAMMRGGHLDIAVLGAFQVAANGDLANWHTGAPDAIP<br>AVGGAMDLAVGAKKVFITTDHITKQGEKIVAEITYPVTKGKHCVDRIYTDLCVIDVTKDGLKVI<br>EKVEGLSFDELQALTGATLIDATQG<br>MKKISLVIAASTMSLSVFAATPITNKSPAKDQFSYSYGYLMGRNNTDALTDLNLDFYQGLQEGA<br>QNKTARLTDEEMAKAINDYKKTLEAKQLVEFQKQGQNAQAGAFLAENAKKSGVITTKSGL<br>QYQVLKEGTGKTPKATSRVKVNYEGRLLDGTVPDSSIARNHPVDFQLNQVIAGWTEGLQTMKE<br>GGKTRFFIPANLAYGEVAGDGTIGPNSTLIFDIELLQVLPK                                                                                                                                                                                                                                                                                                                                                                                                                                                                                                                                                                                                              | 4.2133224 | 2.62E-05    | up   |
| A0A7U4BKB8 | Atypical kinase ADCK                                                    | 51 | 17 | 61 | 17 | 48.8 | DLSLAELNYEIEAQNLVFKTFHSHKLDKIIIPTVYKDYSSRRILTSLEQGDSIETASSWPIERNTI<br>GRRILRALGQEMFFLKRFDHCPHGNFAFRQDGSVIIYDYGSVKTLNEIVYSFKRLVNAARHEDI<br>DLIETELLEHLHSLAEKGFPSDLYKLWIEVLLRPLTTTTYDFAENSSHHDGMLLVKKSLEYWVDF<br>KPSPDTLMVNRTISGHYWNLIHLKVHDNLDLFEELVPPSN                                                                                                                                                                                                                                                                                                                                                                                                                                                                                                                                                                                                                                                                                                                                                                                                                                                | 2.2208355 | 1.98E-05    | up   |
| A0A7U4BNK2 | Coenzyme A transferase family I                                         | 52 | 6  | 12 | 6  | 22.9 | MSYQKLSRDQIAQLVAQDIPDGAYVNLGIGLPTKIASYLPADKDVFLHSENGLLAFGPPPAAGEE<br>DPELINAGKEFVTMLEGGSFFHHGDSFAMMRGGHLDIAVLGAFQVAANGDLANWHTGAPDAIP<br>AVGGAMDLAVGAKKVFITTDHITKQGEKIVAEITYPVTKGKHCVDRIYTDLCVIDVTKDGLKVI<br>EKVEGLSFDELQALTGATLIDATQG<br>MKKISLVIAASTMSLSVFAATPITNKSPAKDQFSYSYGYLMGRNNTDALTDLNLDFYQGLQEGA<br>QNKTARLTDEEMAKAINDYKKTLEAKQLVEFQKQGQNAQAGAFLAENAKKSGVITTKSGL<br>QYQVLKEGTGKTPKATSRVKVNYEGRLLDGTVPDSSIARNHPVDFQLNQVIAGWTEGLQTMKE<br>GGKTRFFIPANLAYGEVAGDGTIGPNSTLIFDIELLQVLPK                                                                                                                                                                                                                                                                                                                                                                                                                                                                                                                                                                                                              | 2.2802428 | 0.003326181 | up   |
| A0A7U5XU67 | Peptidyl-prolyl cis-trans isomerase                                     | 70 | 12 | 49 | 1  | 25.2 | MKKISLVIAASTMSLSVFAATPITNKSPAKDQFSYSYGYLMGRNNTDALTDLNLDFYQGLQEGA<br>QNKTARLTDEEMAKAINDYKKTLEAKQLVEFQKQGQNAQAGAFLAENAKKSGVITTKSGL<br>QYQVLKEGTGKTPKATSRVKVNYEGRLLDGTVPDSSIARNHPVDFQLNQVIAGWTEGLQTMKE<br>GGKTRFFIPANLAYGEVAGDGTIGPNSTLIFDIELLQVLPK                                                                                                                                                                                                                                                                                                                                                                                                                                                                                                                                                                                                                                                                                                                                                                                                                                                       | 4.2490566 | 4.17E-06    | up   |
| A0A7U5XUJ7 | Uncharacterized protein                                                 | 6  | 1  | 1  | 1  | 13.0 | MIVSVTQDSREFNINILKAKRNNEAPFKYWLENVLKRGDILPRGKFFKGTAGKPIWVTDEFWM<br>HREDDIFTSNFIVPPARYGLSIFSEGEAEHFMVLTTRRGRNYESSDD                                                                                                                                                                                                                                                                                                                                                                                                                                                                                                                                                                                                                                                                                                                                                                                                                                                                                                                                                                                     | 0.3641985 | 0.046013867 | down |
| A0A7U5XUN1 | Uncharacterized protein                                                 | 67 | 5  | 11 | 5  | 9.7  | MSVIDRAVEKNANLSYVALKVIECFKADAGLDLNYIDDKISEFSDLSNYAALHQUALRILDDKNINR<br>LADKLGVSISDLETLTFLVNLKI<br>MQLNHYLNFQGGQAEQAFNFKYSVFGGEFAMLSRYSDMPPHDGVTLSEAQKNLVLHVSLPINEY<br>TVLMSDVIDQFCTPNSVFTQGNNHYIAINLEKDEQEAKQLFDALSUNGKIEMPLEKTFWGAL<br>YGAFTDQFGVKWMINCLD                                                                                                                                                                                                                                                                                                                                                                                                                                                                                                                                                                                                                                                                                                                                                                                                                                             | 0.2732505 | 0.001142735 | down |
| A0A7U7KGU4 | Glyoxalase/Bleomycin resistance protein/Dioxygenase superfamily protein | 58 | 6  | 52 | 1  | 16.7 | MQLNHYLNFQGGQAEQAFNFKYSVFGGEFAMLSRYSDMPPHDGVTLSEAQKNLVLHVSLPINEY<br>TVLMSDVIDQFCTPNSVFTQGNNHYIAINLEKDEQEAKQLFDALSUNGKIEMPLEKTFWGAL<br>YGAFTDQFGVKWMINCLD                                                                                                                                                                                                                                                                                                                                                                                                                                                                                                                                                                                                                                                                                                                                                                                                                                                                                                                                               | 2.059774  | 0.000375682 | up   |

|            |                                                            |    |    |     |   |      |                                                                                                                                                                                                                                                                                                                                                                                                                                                                                                                                                                                                                                                                                                                                                                                                                                                                                                                                                  |           |             |      |
|------------|------------------------------------------------------------|----|----|-----|---|------|--------------------------------------------------------------------------------------------------------------------------------------------------------------------------------------------------------------------------------------------------------------------------------------------------------------------------------------------------------------------------------------------------------------------------------------------------------------------------------------------------------------------------------------------------------------------------------------------------------------------------------------------------------------------------------------------------------------------------------------------------------------------------------------------------------------------------------------------------------------------------------------------------------------------------------------------------|-----------|-------------|------|
| A0A7Z1WNT5 | Metallo-beta-lactamase superfamily lactonases              | 49 | 12 | 52  | 1 | 35.4 | MKKLFLVALGLIMGSLHSIYAEPASAAQVPGYYHHQFGNYRITSLLDGTIYLDPKLFLKNLSPA EKT<br>KILTXYAAVNEKGIQTSVNAFLVDDGKSLTLVDSGAASCFCGQPLGSIANKLELAGYQLANVKTV<br>LLTHLHPDHVCGIAQNGKAVFPNATIYAHEREADYWLNPA NEKTVPEDKKENYLGTVKNVKA<br>ALAPYQAKKAFKTFKDGVDVIQGFVEINTQGHTPGHHSFRLKSKGQQIVFVGDIVHSHSLQFDAPK<br>TGVDFDVNSEQAINTRLKMF AEISNKQQWVAAPHLPPFGIGHVYKVS AEQYQWIPLFYNNSLDK                                                                                                                                                                                                                                                                                                                                                                                                                                                                                                                                                                                         | 0.2293999 | 0.014144021 | down |
| A0A7Z1WQ98 | Lipoprotein                                                | 27 | 3  | 8   | 3 | 17.7 | MKKIFLTALATVGLQACTTPYQEMGASGGVEATHIDDNVFQVRASVNGYTHKSIANQYALRKA<br>AEVSKSLGCSYFSAINNTSQSYNQNISKVDSGLMTPNGVYVSSAGTQYKLIKPSRNNYTVCFN<br>QKPNTVLPGLIYNVKYVVLGSPMPTGKFKVPNSWR                                                                                                                                                                                                                                                                                                                                                                                                                                                                                                                                                                                                                                                                                                                                                                        | 0.486477  | 0.012632773 | down |
| A0A7Z2CM08 | Uncharacterized protein                                    | 6  | 1  | 1   | 1 | 28.7 | MILDDYLGHAA NSKKLAQIAIKERRFDDAWKHLNHQKDYYLKHASRMGFSKTETLVIDSSPHE<br>DMANVLRLEGKHKNALSSISYTYKAA YTANRPIITLEKKLEAYYNRAYKKQPFKFLSLLKALP<br>NSDYISVRDLVEIYFPLSPNDDEVAPKERNLSEQEIKK VNDNFLKQRSTARSKHEHIGPPPLSNKPV<br>KAVKPSYPEPKYPTKVIEPQNDNNLILGYPA SEWIIGLMVGVALLIGLIWLLSVSR                                                                                                                                                                                                                                                                                                                                                                                                                                                                                                                                                                                                                                                                        | 2.2301003 | 0.003279783 | up   |
| A0A828SQM8 | Muconolactone Delta-isomerase                              | 23 | 2  | 2   | 2 | 10.5 | MDVHIPLDMPADKANEIKA VEKAYSQDLQRQGGKWRHIWRITGQYSNISIFDVESNEELHNILQG<br>LPLYPYMDIEVMALNRHPPSSVRDDDS                                                                                                                                                                                                                                                                                                                                                                                                                                                                                                                                                                                                                                                                                                                                                                                                                                                | 2.8101852 | 0.015432534 | up   |
| A0A828STC4 | Phenylacetate-CoA oxygenase, PaaJ subunit                  | 52 | 6  | 13  | 6 | 18.6 | MQMRHCIDQCWDVLTQTVSDPEIPVLSVVDLGMIRGVEINDQQEIIIVRLTPTYSGCPATDMLKAQ<br>IVEAFTA EALTPVKVMVDLSEA WTTDWMSEAGKKLQVYGIAPPEGLAHQC GTHVHLTNGVE<br>CPRCKSRHTRLLTEFSS TACKALYKQCDCLEPFDFYKCI                                                                                                                                                                                                                                                                                                                                                                                                                                                                                                                                                                                                                                                                                                                                                               | 2.6145793 | 0.001895603 | up   |
| A0A829K710 | Aspartyl/glutamyl-tRNA(Asn/Gln) amidotransferase subunit B | 81 | 29 | 148 | 1 | 53.7 | MAEAQKLKLIDGWEVVIGIEIHTQLATNSKIFSGSSTEFQDPNTQASLVDLAMPGVLPVLNEKV<br>VELAIRFGLGIDAYIDQASVFARKNYFYPDSPKGYQISQMDNPIVGLGHIDIQLEDGTTKRIGVTR<br>AHLEEDAGKSVHDQFEGMSGIDLNRAGTPLLEIVSEPD MRSV EEA VAYIKAIHTLVRWLGISDGN<br>MAEGSFRADCNVSLRRPGQPFGRCELKNLNSFRFIEQAINVEIERQMEILEWGG EIDQETRLFDP<br>NKMETRSMRSKEEANDYRYFPDPDLLPVIIPDEQIEAIKATMPELPAARRARFIADFGVTEYDAH<br>VLTLSREMADFYEA VVAAGGAKQ GKIAANWVMGEFSGALNKAGLELTDSPVSAEQLGGMIA<br>RIIDNTISGKIAKQVFGFMWESEGKSADDIIAEKGLKQETDTGAIEAIIKEVLAANEK MVEEYKSG<br>KEKAFNGLVGQVMKASKGKANPAQVNELMKKLLIG                                                                                                                                                                                                                                                                                                                                                                                                       | 2.2866118 | 7.24E-05    | up   |
| A0A829RFQ7 | Alanine racemase                                           | 30 | 9  | 33  | 2 | 40.5 | MPPRITAVIHRQALQNNLAVVRKAMPNSKVFVAVVKANAYGHGIERVYEAFAKADGFALLDLDE<br>AKRIRALGWTGPILLLEGIFSPQDLDFDCVQYQLSFTIHSEAQIEWVEQHYPYPAQFDVFLKMNSGM<br>NRLGFKPQHYVQAWERLNNLANVAKITHMMHFSADADGRFGQQGIDYQITAFEEVVKDLPGER<br>SVSNSAAILRYQDQLKSDYVRS GIMLYGSSPDYPTHSIADWGLQPTMSLRSEIHSVQHLEPNESVG<br>YGSNFVAEQPMTIGIVACGYADGYQRISPTGTPVLVDSVRTRTVGRVSMDMLAVDLTGIESAKV<br>GSEVVLWQSS TGVVLPIDDAVSSGT VGYELMCAV TARVQFINQV                                                                                                                                                                                                                                                                                                                                                                                                                                                                                                                                         | 0.1911852 | 0.020850693 | down |
| A0A829RK63 | DNA modification/repair radical SAM protein, putative      | 3  | 1  | 1   | 1 | 48.1 | MSDRIREKLQILADAAKYD VSCSSSGSDRKNKNKGLGDASHSGICHSYTEDGRCVSLKILFSNV<br>CIFDCAYCVSRRSNDVQRAAFTVQEVVDLTINFYRRNYIEGLFLSSGIFKSADHTMERMLQVVKK<br>LRLEENFNGYIHLKTIPGASPELIHEAGLYADRMSINLEMPTEIGLKTFAPEKSHQEVQKDLGLVR<br>DRLIQLKDERQIIKHVPKYVPA GOTTQMVVGAHQESDQDVLFIADKH YKEFKLRVYFSGYIPIN<br>TENNYLPAVGSAPLLRENRLYQSDWLMRFYGFVEIVNEKHPNLDDLVDPKLSWALRHPEQ<br>FPVDLNRADYQMLRVP GIGVKS AKKIVQARRFGKIHIDLLKKGVA YQRAKFFIRCEDSPKFQK<br>ELSSSFIRQQLTQGSSKYVQQLSPQLSLGF                                                                                                                                                                                                                                                                                                                                                                                                                                                                                       | 0.4368904 | 0.000202092 | down |
| A0A836LYR7 | Ankyrin repeat family protein                              | 8  | 1  | 2   | 1 | 19.1 | MHKSNIHQNQENNILIRNAIKKHELITVKKIFSEFPGLLSIDTPFGSWLHVAASSGALEIVKYLITE<br>GLSPNKKGGTFGGNSLNTAVSNGHIDIVEYLLLLNVEMD TTEPERNPLFGAIMKGLS PIVEKLISH<br>DIDYKISYTGDMNNMDAESFALERGEIEIANYLNSLK                                                                                                                                                                                                                                                                                                                                                                                                                                                                                                                                                                                                                                                                                                                                                             | 2.2474831 | 0.020436713 | up   |
| A0A836M1S1 | Flavodoxin family protein                                  | 23 | 14 | 19  | 1 | 96.5 | MFKKFLFQIHWFLGISAGL LLSIMGVTGAIYSYDQQLKWWNTDSYVVAQSSPKLTPAQLYQHF<br>TTIQPEIKINSITIAKDPTASSV VNIKEGERRGNMVMNPNYTAQVLP EVQGRKLLLLIQIHRNLT<br>AGEFGKQITGACALMLIYFVLSGLYLRWPKKHSARQWLAVKPKL KGRNFIWDLHAVVGTWVIV<br>FYLLFACTGLYWSYDWWRS GMFKVLGVEQPKMQGHSGSRNKDQLPKIQLDNAQLITALNQT<br>WSGFNNQIGRDYSTLTVNLPKDDGKIELSFVDATPQHERARNQAVYNYKTANIEKMELYEDK<br>KLNQKIMSSMLPVHRGSFFGPVYQFVAMLASLAMPLFFVTGWMLYLKRRKQK KLTQAARQSL<br>AGHYIDQNAK PWLITYATQTGVAEQLAWSTATSLQE AHQP VQVKS VQQLTEADLQQHEQILFVI<br>STYGTGEAPDLASNAFKLLKTNLELQHVKYAVLALGSKYEPD TYCSFGHTVDEWLKNNGAKA<br>FFDIEVDNANPADIQNW NQALVKATKLDLHAVNIEKVF DNWTLQQRDLLNPNSLGQPAYNIEL<br>TASHEAVWQAGDIAEIQPGNSPERINKFLQH HHHILKNAVVDSLQVSIEKALW NKDLTGEIEPFAN<br>LDHLLQLPTLPTREYSIASIP SQVLR LVVRQQHDESGDLGLGSGWLTQHT EINQNVALRIRTNE<br>SFHLIDDNRPIICIGNGTGIAGLMSLLHTRTRHNYTENW LIFGERQRAHDFFYASTIEAWQTMGM<br>LKRLDLAFSRDQEQRVYVQDIIRQNAAE LINWIERGAVLYVCGSIDGMASGVDQALIHILGEEQV<br>DEL RQQGRYRRDVY | 3.2989324 | 0.004111448 | up   |
| A0A836YML5 | Bacterial regulatory s, tetR family protein                | 25 | 4  | 8   | 1 | 20.1 | MLLFWEHGYEATSISDLTHALEITAPSLYSAFGDKAGLFYKSIDYYLAHEACPIETIFLEAKTAKIA<br>FELYLYDNVKRLVQPNKPAGCMLVVAAMNCSDATQEVQQNLLDKRIKTK EKLLKRLEQGVVEQ<br>GDLPINAPLQEMTDFYATVIQGLTIQARDGASTEQLHKVVEHAMKAWTLF                                                                                                                                                                                                                                                                                                                                                                                                                                                                                                                                                                                                                                                                                                                                                    | 2.8458333 | 8.91E-05    | up   |

|            |                                            |    |    |     |    |      |                                                                                                                                                                                                                                                                                                                                                                                                                                                                                                                                                                                                                                                                                                                                           |           |             |      |
|------------|--------------------------------------------|----|----|-----|----|------|-------------------------------------------------------------------------------------------------------------------------------------------------------------------------------------------------------------------------------------------------------------------------------------------------------------------------------------------------------------------------------------------------------------------------------------------------------------------------------------------------------------------------------------------------------------------------------------------------------------------------------------------------------------------------------------------------------------------------------------------|-----------|-------------|------|
| A0A8B4MT53 | Octanoyltransferase                        | 29 | 5  | 9   | 1  | 24.9 | MSLDKPTLIHQWDLQDYQSKFESMKNLTNRQDENTADELWLLQHHEVLTQGGQAGKPEHILIP<br>SNIPVVQTDTRGGQVTVHGGPQLVAYFLFDLNRLLKWNVRTLVSFAEQFMIDVLKKYNEIAYAKP<br>DAPGVYVDGRKIGSLGFKIRRRGRSYHGLALNLDLCALTGFQITINPCGYAGLEMVRIQDLVTPYPSF<br>EQLCQDFIEYIKATGYFNDPEVKIE                                                                                                                                                                                                                                                                                                                                                                                                                                                                                                 | 0.4552976 | 1.91E-05    | down |
| A0A8E4GYA6 | Beta-lactamase                             | 72 | 16 | 58  | 1  | 27.5 | HPETLVKVKDAEDQLGARVGYIELDLNSGKILESFRPEERFPMSTFKVLLCGAVLSRVDAGQE<br>QLGRRIHYSQNDLVEYSPVTEKHLTDGMTVRELCSAAITMSDNTAANLLLTIGGPKELTAFLHN<br>MGDHSVTRLDRWEPELNEAIPNDERDITMPAAMATTLRKLTLGELLTLASRQQILDWMEADKV<br>AGPLLRSLPAGWFIADKSGAGERGSRGIIAALGPDGKPSRILVIYTTGNQATMHERNR<br>MREGMEMRVIVLGSQVIGVASAYYLARQGAEVTVLDRQSGPAEETSFGNAGQISPGYSTPWAA<br>PGIPFKAVKWMFQHHAPLAINLDGSMWQLQWMAQMLKNCNPQSYAVNKERMRRVAEYSRD<br>CLRELKDTGIHYENRAKGTLLQFRKEAQMEAVQRDISVLEECGVSSELLNANELGRVEPALAN<br>AQDKLVGGHLHPNDETGDCYLFNLAQAIAKELGVNFQFNQNVKLVKIVEGDQIKGVQVNGKVL<br>TADRYVLAFGSRSRDFLKLPLDLQPLVYVVKGYSLTIPIVDPAPFAPQSTVLDETYKIAITRFDQIRV<br>GGMAELSGFNGLNEDRRATLQMVTDQLFPGDMEQASFWTGLRPMTPDSTPIIGATRFKNLFL<br>NTGHGTLGWTMACGSGKLISDIVLNHKTDISTDGLSIQRYSHAHAA | 2.0706876 | 0.006659573 | up   |
| A0A8I0F482 | D-amino acid dehydrogenase                 | 72 | 21 | 150 | 1  | 47.2 | MNGVQLHLQAIEAARNLPFSEQTHPFGEYEVFKILEKMFMLTVEVSGVKMINVKCDPYKSQEY<br>QELYPFIIPGYHMKKHWSIKPHKNLTSDFLRDLIRDSYDLVVKKLPKLDQKRLNNQ                                                                                                                                                                                                                                                                                                                                                                                                                                                                                                                                                                                                               | 5.7351811 | 0.03622829  | up   |
| A0A9P2P5S8 | MmcQ/YjB family DNA-binding protein        | 29 | 3  | 3   | 1  | 14.4 | MTNLSNIVEVLAKQALGGNQASGGGGLGILGSVLGQMGGNTSSGAQGGGLGGVLSVLGQV<br>TGNNTTPQASGQVQSLLIAVPLILGWVQQQGGQLAALEKLGAGLGSQVQSWVDPNQSNSEV<br>PTQQLQSLFNPADIEQVAAQAQAPKEQVYGAIASVLPQVIDSLTPQGESTDHQEANQDIQNVMN<br>LVSGFLK                                                                                                                                                                                                                                                                                                                                                                                                                                                                                                                              | 0.3191363 | 5.20E-05    | down |
| A0A9P2QE53 | DUF937 domain-containing protein           | 7  | 1  | 3   | 1  | 19.9 | MFQHIPPYAGDPILSLMEQFNADTRSEKVNLSIGLYYNEDSIVPQLETIIIEAQKRIEKPNGKTKLYL<br>PMEGFKPYREAIQALLFGANSPAVKAGRAVTIQLGGSGALKVGADFLKTYFPSSDVVWSQPTW<br>DNHVAIFNGAGIKTHFYFYFDAETRGVDFDGMSTLTKTLPEQSIVLLHPCCHNPTGADLNPAQW<br>DQVIAVLKDRNLIPFLDIAYQGGFDGMEEDAYAIRALDQAGLNFIVSNSFSKIFSLYGERVGGTLF<br>VCDDAEAAQCTFGQLKATVRRYSSPPTTGAWLVDVLDNAELNQWQGEVKEMRERIIMRS<br>ILKDELTKALPDRDFSYLVNQGMFSYTGTLTAEQVDILREEYAIYLVRSGRICVAGLNMNNVYT<br>VAKAMAENVLAKSVEAA                                                                                                                                                                                                                                                                                                 | 2.0520231 | 0.015381726 | up   |
| A0A9P2QG90 | Aspartate/other aminotransferase           | 68 | 17 | 115 | 1  | 44.9 | MTEHHVLGLSGGKDSAALAIYMRQNFPELKIRYFFTDTGKELPEVYEFKLEGLGQKIEYING<br>DRDFDFWLRQYNNFLPSAQTRWCTRQLKLPFKKWKIPWLDQGDVYVVAIRADEDHRQGL<br>VSQHKNLEVKLPFRHEHIDKPGVYDLLESSIGLPAYYEWRSRSGCTCFQQKIEWARLKERHP<br>KAFEDAKAYEKTAIDSGSPFTWTRGESLSDLEKPERLAQIYKDYELRKQRAMHRKPVNPLRPQRI<br>DTIDIDDLYLEDEGAGACLVCHK                                                                                                                                                                                                                                                                                                                                                                                                                                           | 0.1451973 | 1.11E-05    | down |
| A0A9P2U9F4 | Phosphoadenosine phosphosulphate reductase | 16 | 3  | 3   | 3  | 32.8 | MNHSVLSKFLHLHIGDSQLVLSQRLAEWCGHAPLEIDIALANIGLDLLGQARNFLTLAQYDEAK<br>RDEDQLAYFRTEREFLNLLCEQPNQDFQAQTVIRQWLMDHYHLHLFTAALQSSLPELSALAVKS<br>LKEVKYHIRFSTSWMERLSLSTDEAHQRVQDGLDNLWRFTAELFELSADEKALVAEGVIPDFSN<br>EKEQWNQTIADELKRFEINVAVNGAYRRGAKQGLHTEHLGYLLAEMQCIQRTYPGMTW                                                                                                                                                                                                                                                                                                                                                                                                                                                                    | 0.4968609 | 0.035099758 | down |
| A0A9P2UEN7 | 1,2-phenylacetyl-CoA epoxidase, subunit C  | 55 | 13 | 31  | 13 | 28.8 | MSNSDIQKINTNEVMSAVTVFNKVVYLSGQVPKNTQDVAGQTRREILATIEELLALANTDKSRL<br>LSAQLYLKNSLDFSTVNAIWDVWDLKGCVAPSRATIQAIDLVPDVLIEIAVTAQAQK                                                                                                                                                                                                                                                                                                                                                                                                                                                                                                                                                                                                             | 2.8856875 | 0.00192446  | up   |
| A0A9P2UFA0 | RutC-like superfamily                      | 86 | 7  | 50  | 2  | 13.1 | MKPLSIYNEKSGFHASKHEDVYEQMLMTVFTEYGFIEQVFEINENTLFDLNNVIHRHSQNT<br>GVVVAAGGDGTLNAVATKLNKTSIPMGILPLGTFFNYAVKLEIPLDLLEAAEVIATGKPRSVHV<br>AVINDHIYLNNASLGLYPLFIKRELKYNKYLRPLHAYTSALDVLLENKSMKLSITVDGKKYP<br>VKAPLIFFGNQLQLCDMKLRIAECAAAQGRVAGVVITKSDKLSLNLMLWQWVQGGVEDAQDV<br>YSFCADHVIVDCAKKTCLTVALDGEIEMKPLNFTVEKNALNIMVNPVNTTSV                                                                                                                                                                                                                                                                                                                                                                                                             | 3.4774875 | 0.00065741  | up   |
| A0A9P2UFT2 | Diacylglycerol kinase, catalytic domain    | 42 | 7  | 10  | 2  | 34.4 | MTVVKRLHVTSRYCEVAISGNLVHLAGQLADDTSDVITAQTQQTLDNIDRLAAEAGTDKSHILSV<br>MIFLKDIDKDYAAMNTVWDAAWISKEHPPARTCVESKLYAPDVLVEMTVVAVLP                                                                                                                                                                                                                                                                                                                                                                                                                                                                                                                                                                                                               | 2.8084037 | 0.003572572 | up   |
| A0A9P2UGQ7 | Endoribonuclease                           | 68 | 4  | 17  | 1  | 12.9 | MGTSTSSKGPNGKTPVPSWANEGGGAISCGIDNTLGEFRGYLGKAAANKPSGPGTNRKAIGH<br>YAKNATGGKKVAPKRYQKLIAGGGFLDFLQNIQAGKDHLNLKIADLNGQPIDIVIDQIENLLV<br>VDGDSERIRASLNQSLAECLDGMDDFDFTQISSDMIIDLMLNYTEQYLFQHQILDSRAAFDKADTP<br>ENIASLEQDLHSLIKSSVDKHMSAQLKNRENTLTRSEIEHIQMKALEDIWGEWEDYLN                                                                                                                                                                                                                                                                                                                                                                                                                                                                     | 2.9405966 | 8.61E-06    | up   |
| A0A9P2X8Z1 | Uncharacterized protein                    | 43 | 8  | 17  | 8  | 27.8 | MSVIDVGGEVREGEELDIGAVENWLKNQGVELVGPVVTVQYTGGSANWYRKYRKYENTDLILRR<br>PPKGTAKAKSAHDMAREYMVQKNLAPYYPVLPKMVALCQDESIVIGCDFYVMERIEGIIIPRAKLP<br>ELGFNEDDVHELVCNVIDKLIELHQVPYENTPLAELGKGTGYCRRQVEGWDKRYEKVRTINVPS<br>FKYVRRWLNDNIPQDSTTCIHNDRWRFDNVILDPEHPTEVIGVLDWEMATLGDPLMDLGSALAY<br>WVEPTDNMIFRSTRQPTHKGMFSRKEVVDYLLQKTGLEPQNWTFYEVFVFRFLAVIAQQIY<br>YRYHYKQTRNPAFKDFWIVIHALHIRALKLIAQQKLQSEFAQQSLQKIQILRR                                                                                                                                                                                                                                                                                                                                  | 0.4833703 | 0.042906604 | down |
| A0A9P2XHD2 | Phosphotransferase enzyme family protein   | 56 | 16 | 38  | 16 | 43.3 |                                                                                                                                                                                                                                                                                                                                                                                                                                                                                                                                                                                                                                                                                                                                           | 3.2336421 | 8.78E-05    | up   |

|            |                                                                      |    |    |    |    |      |                                                                                                                                                                                                                                                                                                                                                                                                                                                                                                                                                                                                                                                                                                                                                                                                                                                                          |           |             |      |
|------------|----------------------------------------------------------------------|----|----|----|----|------|--------------------------------------------------------------------------------------------------------------------------------------------------------------------------------------------------------------------------------------------------------------------------------------------------------------------------------------------------------------------------------------------------------------------------------------------------------------------------------------------------------------------------------------------------------------------------------------------------------------------------------------------------------------------------------------------------------------------------------------------------------------------------------------------------------------------------------------------------------------------------|-----------|-------------|------|
| A0A9P2XJZ6 | UDP-glucose 6-dehydrogenase                                          | 40 | 12 | 27 | 1  | 47.2 | MKIAVFGTTLHAGVMAALLAEYGNQIYWCTSVTCEENISILSYQDQEVNHYLNKQRKAGFLKES<br>PFSEIPLDIEVYLFCSFPTQIELALKTVEKLSERPIVHPRLMINGSTFGLHGTNQLKQHLPKDEWVY<br>FPDVIQEGNAINSVLNVKHVIVGVESY AQDTMQELLRPFFRFYSYQLFMPILDAEFTKLSISGML<br>ATRISYMNDLAMVAEKLGDIANVKHGIAADTRIGAAAYLSAGVGFGENFSDHILTLSSVSTGTG<br>AKSRLLLEQVWAINEQQKEILFRKLNWYHCDLSGKTVAIWGASFKENTSSHTNSPIHILLAALW<br>AQGVKVRLLHDPQALDEIETTYGDREDLVLCADQYEAQAQGAHALCLVTAWKQYWSPDFKQLQQ<br>VMQHPLILDGRNIYDPAYVKAAGFA YEGVGRLL                                                                                                                                                                                                                                                                                                                                                                                                          | 0.4080428 | 0.000410168 | down |
| A0A9P2XK89 | Bacterial transferase<br>hexapeptide family protein                  | 30 | 4  | 9  | 4  | 20.9 | MKKKLRKLIYFILPCIRLFLNLFKRRKYLEGRFFSKLSLSGYVWA VRSIWKVKNILRLSKPTPFPTALT<br>CSISNPYNIHFHPDDLNNFQSPGT YFQNFSAHIYIGKGSYIAPNVGIHTSNHDLADLESHTEGKD VV<br>IGDKCWIGMNSVILPGVVLGNGTIVAAGAVVTKSFKQGNIVIAGVPAKIIEIK<br>MQQWLRSSKFLILFPIWLFVLSWIRPLSVPDEGRYGDISRTMFESGDWLT PRIDGLPFMHKPPLL<br>HWLSSMFEMELFGVHVWVLRVLPVLAGTLMVLVGLFLFVKKHISEVAQLTVIILATNLLFFGSSQ<br>YINHDLLASWITISVLCFVDFDTISAQKSILFLGYIAGAAAFSLKGLIGLIPGMILLPWLIYTKQWK<br>KIPSLNPLAILLFLVSPWLYLVQSKYPQLHYFFIDQQFNRFSSKEFNKQPWCFYLIILFVSWFL<br>PWLFASTRFTSIKTIFKDYKCSLLALFVWVWFVSVTVFSSIPPSKLAGYILPAVPLAIFVALVMNKV<br>LESSNKTRLQWTWGIPVFTILVIGVVSATPHFIRAHQPFFQNAIFIYLIGALLIVLPLVLVGLYKKQ<br>KLYLYTIFISLIVLCSAVPFAVRILDTKNNVGQTDFAEYIAPSTKIVFYNYFYDVPFLKLLKQPV<br>YIVNQWDTVHSDASLEIKDGLLFEPQLKKYLWSEQQLQDALMQKQDLIVISQPHNFATKDPV<br>KTLHYRNYDVFIHPSK                                                                  | 2.3719896 | 6.61E-06    | up   |
| A0A9P3CXB6 | Dolichyl-phosphate-mannose-<br>mannosyltransferase family<br>protein | 13 | 5  | 10 | 5  | 63.3 | MQLADLRIAIIGLGYVGLPLAVEFGKKGPVIGFDINQNRIDELKSGKDHTLEV SPEELQKAEQLSF<br>SANLDDLKTSNFFIVTVPTPVQVNRPDLTPLKKASETVGQALKKGDIVVYESTVYPGATEEVC<br>PILEKVSGLKFNQDFFAGYSERINPGDKVNTLTKIKKITSGSTPEVANTVDVAVASIHTAGTHKA<br>SSIKVAEAAKVIENTQRDLNIALVNELSVIFDRIGIDTLDVLEAAGSKWNFLPFRPGLVGGHCIGV<br>DPYLLTHKAEVGYHPQVILAGRRINDMARYV ARNTIKLMLQNGIDVPRSKVGVLVGVTFKEN<br>CPDIRNSKVADLIKELEFWGAQVVADPWADAEEVKHEYGVELGTVNAQNPVDSLIVAVGHSE<br>FRSLASSELRSYVKAEPVLADVKLSLFDRTQMSDVGFTV FRL                                                                                                                                                                                                                                                                                                                                                                                                    | 3.6057037 | 5.58E-08    | up   |
| A0A9P3CXM7 | Nucleotide sugar<br>dehydrogenase family protein                     | 64 | 20 | 77 | 16 | 47.1 | MNNEYFKLYTDSQFLSPYAFVTVFVGLHEKQIPFEIAAIDLGOQQGFETSFVEKSLTAKVPVLEHN<br>DFALSESSAILEYLEELYPDTAIYPKDIQARARARQIQAWLRSDLVALRTERPTDVIFIQPKSTPLS<br>EEGKKA AEKLFVAEKLLASDAEFLFGSWSIVDAELALMLQRLIQNGDAV SERLKNYALQQWQ<br>RPSVQKW LALRHK                                                                                                                                                                                                                                                                                                                                                                                                                                                                                                                                                                                                                                          | 5.1588481 | 3.78E-06    | up   |
| A0A9Q1N7W9 | Uncharacterized protein                                              | 55 | 10 | 18 | 10 | 23.8 | MSQELHFAVSQFLYKKAELCDAYDWDAYLELYDEDESEYHIPQWIDDHNYVQDPNQGLSYIYYA<br>DRTGLEDVRFRIRTGKAASATPLPRTLHSINIRVKTLEDGLIEAKVAWQTLYNRQGLEGCFYGH<br>ATYLLRQTADGFRIRRQHSILLNDKIDSVLDFYHV                                                                                                                                                                                                                                                                                                                                                                                                                                                                                                                                                                                                                                                                                              | 2.3960197 | 0.003082826 | up   |
| A0A9Q1NIM9 | Ring-hydroxylating<br>dioxxygenase beta subunit                      | 39 | 7  | 14 | 7  | 19.1 | MEDVLICDFIRTPIGRYAGALS AVRADDLAALPIKYLKDKHPNLPWNTVDEVFLGCANQAGEDN<br>RNVARMATLLAGLPDTPAMTVNRLCASGLDAVGLAARSIKAGEAQFVLAGGVESMSRAPFVQ<br>AKPTAEFSRTPPEIYDTTIGWRFVVKQLKAQYGTDSMPETAENVAEKYQISREDQDAFALRSQQK                                                                                                                                                                                                                                                                                                                                                                                                                                                                                                                                                                                                                                                                 | 2.1510864 | 0.002562947 | up   |
| A0A9Q1NNH7 | Beta-ketoacyl CoA thiolase                                           | 62 | 18 | 55 | 2  | 43.1 | TAAAQQNGFFNDEILPVEITDRKKNVNVNRDEHPRETTLEALAKLAPFKKEGGSVTAGNASG<br>VNDGAACVLI TNREFADTHGLKPLARVIGIASAGVEPKYMGIGPVPVAVQKILKQTGLTLDQMDV<br>IELNEAFAAQSLACMRELGLKDDDERVNTNGGAIALGHPLGMSGTRLVITATRELKRRGGRYAL<br>CTMCVGVGGVALILENLN                                                                                                                                                                                                                                                                                                                                                                                                                                                                                                                                                                                                                                           | 2.5920738 | 0.01150206  | up   |
| A0A9Q1RYZ7 | Octanoyltransferase                                                  | 29 | 5  | 8  | 1  | 24.9 | MSLDKPTLIIRQWNDLQDYQSKFESMKNLTNQRDENTADELWLLQHHEVLTQGGQAGKPEHILIP<br>SNIPVVQTD RGGQVTWHGPGQLVAYFMFDLNRKWNVRTLVSF AEQFMIDVLKKYNI EAYAKP<br>DAPGVYVDGRKIGSLGFKIRRGRSYHGLALNLDCA LTGFQTINPCGYAGLEMVRIQDLVTPYPLF<br>EQLCQDFIEYIKGTGYFNDPEVKIE                                                                                                                                                                                                                                                                                                                                                                                                                                                                                                                                                                                                                                | 2.6587972 | 1.35E-05    | up   |
| A0A9Q1RZT3 | 2-methylisocitrate dehydratase<br>AcnD, Fe/S-dependent               | 59 | 35 | 98 | 5  | 86.6 | MNTKYRKPLAGTQLEYYDVRQAVEDIQPGAYEKL PYTSKVLAEQLVRRADAENLTA YLTQLIE<br>RRQDLDFPWYPARVVCHDILGQTALVDLAGLRDAIAEKGDPKSNVNPVPTQLIVDHSLAVEYG<br>GADPDAFAKNRAVEDRRNEDRFHFIEWTKTAFKNVDVIPAGNGIMHQINLEKMSPIVQARDGV<br>AFPDTCVGTD SHTPHTDALGVISVGVGGLAENVMLGRASWMRLPDIIGVELV GQRQAGITATD<br>IVLALTEFLRKERVVGAYLEFFGEGADSMSVGD RATISNMTPEYGATAAMFYIDQNTIDYLRLT<br>GREDAQVALVEQYAKEIGLWASEMTKAEYPRVLRFDLSTVTRNIAGPSNPHARVSTSDLKEKGI<br>AGVVENRSDGLMPDGAIIIAITSCNTNSNPRNTVAAGLLARKANELGLVRKPWVKSSFA PGSKA<br>AALYLEEAGVLKDLEKLGFGIVAYACTTCNGMSGALDPAIQQEIIDRDLYATAVLSGNRNF DGRI<br>HPYAKQAF LASPPLVVAYAIAGTIRFDIEKDALGYDKEGNPIYKDIWPSDAEIDALVKQAVKPE<br>QFRKVYIPMFDLGEVEQAKSPLYDWRPQSTYIRRPY WEGALAAPRTL ANMRPLAILGDNITTD<br>HLSPSNAILMDSAAGEYLHKMGVPEEDFNSYATHRGDHLTAQRATFANPKLYNEMVRRSDGTI<br>KQGSKARVEPEGEVMRMWEAIETYMNRKQPLIIHAGADYQGSSRDWAAKGVRLAGVEAIVAE<br>GFERIHRTNLVGMGVLPLEFK | 0.1790473 | 0.006145934 | down |

|            |                                                                       |    |    |     |    |      |                                                                                                                                                                                                                                                                                                                                                                                           |           |             |      |
|------------|-----------------------------------------------------------------------|----|----|-----|----|------|-------------------------------------------------------------------------------------------------------------------------------------------------------------------------------------------------------------------------------------------------------------------------------------------------------------------------------------------------------------------------------------------|-----------|-------------|------|
| A0A9Q1S0P9 | Phenylacetyl-CoA epoxidase, subunit B                                 | 45 | 4  | 12  | 4  | 11.3 | MEDKNNWSLYEVFVRSKQGLSHRHVGSRLRAPDDEIALQHARDVYTRRNEGISIWVVRSELIKSSQPDEKAEFFDPSLDKVVYRHPTFYHIPDGIHEM                                                                                                                                                                                                                                                                                        | 3.0360604 | 0.001948252 | up   |
| A0A9Q1S3Z9 | Isocitrate dehydrogenase NADP-dependent, dimeric, prokaryotic         | 69 | 23 | 150 | 1  | 45.6 | MGYQKIVVPADGDKITVKADLSLNVQNHPIIPFIEGDGIGVDITPAMKKVVDAAILKAYGGKRSEWMEVYCGEKANKIYGTYPPEETFEALREFVVSIIKGLTTPVGGGIRSLNVALRQELDLVYCVRPVRWFQGVPSVPQHPELTDMMVIFRENSEDIYAGIEWKADSEEAKKVIKFLQEEMGVTKIRFPEGC                                                                                                                                                                                        | 0.2551807 | 0.029880242 | down |
| A0A9Q1W4V0 | Poly-beta-1,6-N-acetyl-D-glucosamine N-deacetylase PgaB               | 54 | 27 | 96  | 27 | 75.7 | GIGIKPVSKEGTQRLVRKAIQFAIDNDKPSVTLVHKGNIMKYTEGAFKEWGYELALDRFGGELIDGGPWVKIKNPKNGKDIHKDVIADAFLLQQLMRPADYSVIATLNLNGDYISDALAAEVGGIGIAPGANIGGAIAYVEATHGTAPKYAGQDKVNPGSILSAEMMLRDMGWTEAADLIKIGISGAIAAKTVTYDFERLMPGATLLRCSEFGDAIIQHMED                                                                                                                                                            | 2.5761532 | 0.00016328  | up   |
| A0A9Q1ZY45 | Methylated DNA-protein cysteine methyltransferase, DNA binding domain | 27 | 3  | 4   | 3  | 12.9 | MITRFASPLLNTLGLALAGLSGMVLANPPKIDASTLTVIGYHEITDTKNALIPQYAVTTOQFTEHVDWLQKNGFHFITVDQLIRAHQGKAALPTKPVLLTVDDGYQSFYQNAYPVIAKAKKIPVVLAVVGSWLEPKAGQKVDVFSGEEIPRDKILSWGELKEMQDSGFVEIASHSYHLHRGITGNPQGNSEPAAT                                                                                                                                                                                       | 2.5693831 | 1.24E-05    | up   |
| A0A9Q2E0D7 | Trimeric LpxA-like superfamily                                        | 35 | 4  | 13  | 4  | 20.5 | TRFYDVKTCTYENDSQYQARIYNDLKKNNQLLKEHGIRSPRIMVWPYGRYNNMQTVQIAKGLGMPITITLDDGADHAKQSLQNMRSRLVEGGMSTNDLAEIKNRELNLTDDNNRPQKIMHIDLDDYIYD                                                                                                                                                                                                                                                         | 3.1447773 | 0.000646353 | up   |
| A0A9Q2I4G4 | NAD(P)H dehydrogenase (quinone)                                       | 3  | 1  | 1   | 1  | 26.6 | PDPQQQERNLGHLLDRINAMGVNTVYLQAFSDPDANGSADMVYFPNRHIPMRADLFNRVAWQIQTRTPVSRYAWMPLLAWEPLKTDVPSKDLVVEQAKAGEHLNMGYIRLSPFSPEARQTIREIYQDLAKSASFNGILFHDDVTLSDYEDASPDALKAYAKQGLPTDLAKIRENDQDLQKWTAYKTKYL                                                                                                                                                                                             | 2.0277427 | 0.001498574 | up   |
| A0A9Q4SJB7 | Bacterial solute-binding protein 3                                    | 56 | 14 | 31  | 1  | 31.7 | DDFAMQLVEDVRQYEPFLLTARNLYAQVALKPYAENWYSQSLEESLRRYDFTAIMAMPYMEQVDNADQFYKDMIDRVKKYPNGIKKTVFELQATNWRNNEKVPSTEMAATIHSLYQQGAMHVAYYRDDPIKDHPDVNVMHKAFAEKSSRLVP                                                                                                                                                                                                                                  | 0.1650206 | 0.007138888 | down |
| A0A9Q4SK06 | Flavoprotein-like superfamily                                         | 23 | 14 | 19  | 1  | 96.5 | MSTFMSILTTQYELHRQILEVIALIPYGVVATYGGVARMAGLPKHARLVGVYVLKHLEADHQVWPYWRVINSQGKISLSKFNEKGENIQQLKLEAEGIYLLNGKVNLFKEFAWQP                                                                                                                                                                                                                                                                       | 0.2100811 | 0.000107539 | down |
| A0A9Q4XE51 | Bacterial sugar transferase                                           | 47 | 7  | 10  | 6  | 23.4 | MSFYQHETAIVDNGAQIGEDSRVWHFVHVCGGAKIGKGVSLGQNVFVGNRVVIGDHCKVQNNVSVYDNTLEEGVFCGSPMVFNTVYNPRSLIERKDQYRDTLVKKGATLGANCTVCGVTIGAYAFVGAGAVVNKDVPAYALMVGVPKQIGWMSFEGEQLDLPLQGQAICSHGTGAVYQLHGTTLMNILIVHAHPEPLSFTTSLKTTAQQTFKKLGHQVEISDLYAMQFNPVASKEDFLELNQPDYFNYLEQRNATKQQLLSPDIQAEIDKVNRAIDLVLNPLYWTSPAILKGWIDRVFVSGLFYGGKRFYNHGGMAGKKAMLCLTLGGRRTHMFGENSIHGPIEHLSPIQRGTLAYTGFVEVLPPIAYHVAYISQEA | 3.104304  | 0.00913383  | up   |

|            |                                                       |    |    |     |   |       |                                                                                                                                                                                                                                                                                                                                                                                                                                                                                                                                                                                                                                                                                                                                                                                                                                                                                                                                                                                                                                                                                                                                                                                                                                                                                                                                                                                                                                                                                                                                                                                                                                                                                                                                                                                                                                                                                                                                                                                                                                                                                                                                                                                                                                                                                                                                                                   |           |             |      |
|------------|-------------------------------------------------------|----|----|-----|---|-------|-------------------------------------------------------------------------------------------------------------------------------------------------------------------------------------------------------------------------------------------------------------------------------------------------------------------------------------------------------------------------------------------------------------------------------------------------------------------------------------------------------------------------------------------------------------------------------------------------------------------------------------------------------------------------------------------------------------------------------------------------------------------------------------------------------------------------------------------------------------------------------------------------------------------------------------------------------------------------------------------------------------------------------------------------------------------------------------------------------------------------------------------------------------------------------------------------------------------------------------------------------------------------------------------------------------------------------------------------------------------------------------------------------------------------------------------------------------------------------------------------------------------------------------------------------------------------------------------------------------------------------------------------------------------------------------------------------------------------------------------------------------------------------------------------------------------------------------------------------------------------------------------------------------------------------------------------------------------------------------------------------------------------------------------------------------------------------------------------------------------------------------------------------------------------------------------------------------------------------------------------------------------------------------------------------------------------------------------------------------------|-----------|-------------|------|
| A0A9Q6DWC7 | ANL, N-terminal domain                                | 18 | 14 | 19  | 1 | 148.0 | MNQFVNTKNVIRGKYHPEFLQNEVLADIFAHTAQTLPDKTALIEADKTLISYGELYQQALIMAQ<br>HLALKGVKPGHIVGLWLPRIEELKAQLAICLSGAAWLPFMDTPADRIAUCLEDAEAVGMITT<br>DEWYEHLAEVPQTKWTNTEQKPLSESVSLAKTTPDQPAYIITYSGSTGKLGKIVITQKNICHFLR<br>SENSILGIQEODKVVYQGFVAFDMSFEEIWSYLVGATLWIAPKSLVSDPERLCQTLKQEQITVLH<br>AVPTLLALFPEDVFNLRINLGGEMCPDSLVDWRWALPHHQMFTYGTETTVSASLELLERKPKV<br>TIGKPLPNYGMVLINSERELLEQGETGELCIFGPSVAQGYLGRPDLTADKFIENPWAMSVEEELL<br>YRTGDLAKIDEFGQVHCLGRADDQVKIRGFRVELGEIEAALCDIDGIGTAAVILRPEDIGDQIAFI<br>APEIDAKQAIEIKELRHNLSQLRPPYMPVNRFEIIEVPRLLSGKIDRKALKARPLTSVVRDSESDQ<br>PQNPAAEILFEILNRLFPNMPKLDSDFFDDLGGHSLAAVLISNLRHAEYSHLTIQNLYQARRVG<br>AIAALMLEQPEPTLFDSQIGQDNPRNQTYKWLWCGIAQLVTIPVLISINLQWLPFFTYHYFTGGT<br>RDSIPYAIALLVYVSVIMSSFVLSITVKRLLMLGIGAGRYPLWGLTYFRWWLADRISNISPVYL<br>LSGSTLLNLYLKGAKIGHDVTISSVHIRMPSLLTIEDGVSIGSQVNLNAKVEHGHVLVLSIHL<br>KQDSYVGSYAVLEENTVLEKQAHVNALTSIEYDVTVPPEGEIWDGTPAQKIGHIDEQAKLPERPK<br>LSFIRKIAEYGYGVSAIIACLFPIFSPFLLVDWLDVNVFNINPNHLLQIALYYFILAIPASAMM<br>MMITAVISSGLRKIALPRLEIGTYAVHGSTYRKYWFAAQILETSLQTLHGLFATIYAPTWFRMLG<br>AKVGNTEIATGVIPEMLTLGEESEFIADAVMLGDEEIKGGWMSLKATKIGNRSFVGNASAYIAD<br>GTVLPDNLVIGVQSKTPDNREMYDGTWFGSPALLPAREAAEKYPDHLTFKPSIKRRLMRGFI<br>EGLRIVLPAALAIGVGYMIVLDVIDVINNYNIETGLVALTLAGLLYGVGCLFVALLKWLIGRYQ<br>PRSAPMWTMFVWVWSEGITSLYESVAIPNFLNYLRGTPMLPFFLRILGVRIGKDVYMDTADITEFD<br>CVSIGDRAEFNSFGPQTHLFEDRIMKIGQVNVGNDVVNTRSIILYNANVSNHAVLGPLTLVMK<br>GENIPAKSAWIGSPAVPVWHK<br>MPHLASYVYGTWHSSDEELRTVYHAITGEAIYAVSSHGVDMKRVVQYAKQNGSELANWTFHQ<br>RANALKQIAQHLLERKEDFYKLAYATGATRKDAWIDIEGGIQTFLFAYSSLVRRELNDEKIITEDS<br>WIQLSKNGTFGAKHILSPKAGVAVHINAFNFIWGMLEKIAPTLTAGVPCIVKPADGAQLTQAV<br>VKAIEETHVLPKQALQLICGQTYDLLEQLGPDQCVTFTGSAITGQKLRNHPHLNKYSIFPSMEAD<br>SVNSAILSPEANEETVDFLVREVFREMTTKAGQKCTAIRRAFVPENLLATVQEKLAKLAKVVV<br>GDPQKEETTMGALASIKQKHDVAEKVAELSKDAKIVFGGNSDFTFNADHPEKGAFFAPTLVCE<br>QPLQATNVHTTEAFGPVCTLMYPQNIIEELADLVSRGEGSLVASVKNNDENIEQIIQKIAPWHGR<br>VHVLDAESAKESTGHGSPLPHLVHGGPGRAGGEEELGGIRAVKHVMQRTAIQGSNLSLTQITHS<br>WTAGSKVNEDRVHPFKKSFDELVIGERLLTARRTVTEADIVNFACLSGDYFYAHTDKIAAAESFF<br>GERVAHGVIYVAAAAGLFDVAAQGPVIANYGMDNLRVFEVVKIGDSIQVELTCKQKTPKPKQKDA<br>SQPAHGVVVWDIKVKNQRGELVATYDILTIVAREA<br>LFTTYSPIWLVVWFTSIYQIINITIKIDDLISKKLNRRQYIKTSLNSILIFFKLLSSALQKSLQLPDDIE<br>PWSKKIPTPVKFGYIIESSWFIASLTTTTYFILIALLTILTKLLTIPDFLTFIGISAILVVCSTRFLYV<br>EGRCLLKAKNYNKINI | 2.0800207 | 0.000444415 | up   |
| A0A9Q7DS60 | Aldehyde dehydrogenase domain                         | 56 | 29 | 123 | 3 | 74.2  | MKKILLAGFLGLAGCATTQQPSEPVKFEKVYQIDGLKQGQIYDGARQWFATAFRSANAVIQ<br>YEDKTTGSHIGKGNMPCYRCSGFADCMVTAGDRVDFTVRVDTKDGKMKVSYDNLTHYKPAQV<br>ISGVRYNETNRPITEDYPSAKIIMDELNKSSDQMAEKIKTQKINADW<br>MFKSFFPSPRYFFISAVIWIALNMVLYWYTGDDHWGQYLGFPQGYADAEPVIGVSRFVSPAFLWF<br>YLWFLVSTALFASFVKIISNNPWQRWSIWGSAFILFNIWFSVQVSVAINAWYVPFWDLIQOMLSS<br>GGDLSALYSETLVFLYIAMVAVTLAVINAFVTSHYVFRWRTAMNEYYTEHWKLRHIEGASQ<br>RVQEDTMRFATILEDLGVELVKAIVITLAFILPILFQLSKHVPVLPVIGELESVWAAIVWSIFGTV<br>LLMVVGKLPGLQFNQKVEAAYRKELVYGEDHADRAKPATLRELFNSVRKNYFRLYFYHYAYF<br>NMTAIWYQQLDILYNLVVLFPSIAAGKLTGLLIQIANVFGFRVRESFYQLITSWKTHIELLSIYKRL<br>KAFESILHK                                                                                                                                                                                                                                                                                                                                                                                                                                                                                                                                                                                                                                                                                                                                                                                                                                                                                                                                                                                                                                                                                                                                                                                                                                                                                                                                                                                                                                                                                                                                                                                                                                                                                                                                         | 2.3672363 | 0.003203587 | up   |
| A0A9Q7GEX3 | Uncharacterized protein                               | 4  | 1  | 1   | 1 | 18.3  | MVVFMPALELKNRFHVNDLLSGVVVFLVALPLCLGIALASGAPIISGHIAGIVGGIIVGLSSGSHISV<br>SGPAAGLTAVILVQLDQLGGNYAAFLLCIVFAGILQILFGVFKLGFANFIPNNVILGLLAAIGAILI<br>VTQLPYLFLGLTDFSWKEVWTATPDTFIQKFDAGAALIGLLSFLILAWDSSPLKALPALSAIAVV<br>LAAVFNFLVISIGSSWAVQSNLIQLPNILQAPEEVLVFPDFSYLAEPLIYTGAITLAIVASLETLLN<br>LEAADKLDLPQKRSSPPNRELWAQAGNIVSGLIGMPVTSVIVRSSVNANTGARSKCSTIHHGVL<br>LLLAILFFVPLMNMIPLSALAAAILVTFGKLTHTPKLFLKQLYQKQWRQFLPFIITLVAILLTDLTTLGIL<br>VGLFTSSAFILYGNFNKGVRYKEKHLHGIVTRIELPSQVTFLNRSALISALEHIIHKDQQLIIDATQ<br>CDSIDPDYQVIQDYQNETAVKRQVLDLKLIGFKQHYEEVDDAVLDIYISTRDLQRKLSQPQVITLL<br>KEGNERFVKNERLQRDIYRQIRVTADEGQHPHIAAVLGCMDSRAPTEMIFDVGIGDLFSLRIAGNIA<br>GQKVLGSLEFACQAKGSKVILVLGHTDCGAVTSACQLRLQKQISDVKEMPHIQYVLPMLMHS<br>VESVYDIMQPRELNKTFVNQVTAMNVHYNIQYIINNSTVLKDLLDRGEIAIVGAIYDVKTGHVEF<br>LDA                                                                                                                                                                                                                                                                                                                                                                                                                                                                                                                                                                                                                                                                                                                                                                                                                                                                                                                                                                                                                                                                                                                                                                                                                                                                                                                                                                                                                                                                                                                                                          | 0.4286605 | 0.041248887 | down |
| A0A9Q7ZZR4 | Domain of unknown function DUF4468 with TBP-like fold | 51 | 9  | 22  | 8 | 19.4  | MVVFMPALELKNRFHVNDLLSGVVVFLVALPLCLGIALASGAPIISGHIAGIVGGIIVGLSSGSHISV<br>SGPAAGLTAVILVQLDQLGGNYAAFLLCIVFAGILQILFGVFKLGFANFIPNNVILGLLAAIGAILI<br>VTQLPYLFLGLTDFSWKEVWTATPDTFIQKFDAGAALIGLLSFLILAWDSSPLKALPALSAIAVV<br>LAAVFNFLVISIGSSWAVQSNLIQLPNILQAPEEVLVFPDFSYLAEPLIYTGAITLAIVASLETLLN<br>LEAADKLDLPQKRSSPPNRELWAQAGNIVSGLIGMPVTSVIVRSSVNANTGARSKCSTIHHGVL<br>LLLAILFFVPLMNMIPLSALAAAILVTFGKLTHTPKLFLKQLYQKQWRQFLPFIITLVAILLTDLTTLGIL<br>VGLFTSSAFILYGNFNKGVRYKEKHLHGIVTRIELPSQVTFLNRSALISALEHIIHKDQQLIIDATQ<br>CDSIDPDYQVIQDYQNETAVKRQVLDLKLIGFKQHYEEVDDAVLDIYISTRDLQRKLSQPQVITLL<br>KEGNERFVKNERLQRDIYRQIRVTADEGQHPHIAAVLGCMDSRAPTEMIFDVGIGDLFSLRIAGNIA<br>GQKVLGSLEFACQAKGSKVILVLGHTDCGAVTSACQLRLQKQISDVKEMPHIQYVLPMLMHS<br>VESVYDIMQPRELNKTFVNQVTAMNVHYNIQYIINNSTVLKDLLDRGEIAIVGAIYDVKTGHVEF<br>LDA                                                                                                                                                                                                                                                                                                                                                                                                                                                                                                                                                                                                                                                                                                                                                                                                                                                                                                                                                                                                                                                                                                                                                                                                                                                                                                                                                                                                                                                                                                                                                          | 4.7346021 | 1.13E-05    | up   |
| A0A9Q8MVK5 | ATP-binding cassette sub-family D                     | 12 | 5  | 9   | 5 | 46.3  | MVVFMPALELKNRFHVNDLLSGVVVFLVALPLCLGIALASGAPIISGHIAGIVGGIIVGLSSGSHISV<br>SGPAAGLTAVILVQLDQLGGNYAAFLLCIVFAGILQILFGVFKLGFANFIPNNVILGLLAAIGAILI<br>VTQLPYLFLGLTDFSWKEVWTATPDTFIQKFDAGAALIGLLSFLILAWDSSPLKALPALSAIAVV<br>LAAVFNFLVISIGSSWAVQSNLIQLPNILQAPEEVLVFPDFSYLAEPLIYTGAITLAIVASLETLLN<br>LEAADKLDLPQKRSSPPNRELWAQAGNIVSGLIGMPVTSVIVRSSVNANTGARSKCSTIHHGVL<br>LLLAILFFVPLMNMIPLSALAAAILVTFGKLTHTPKLFLKQLYQKQWRQFLPFIITLVAILLTDLTTLGIL<br>VGLFTSSAFILYGNFNKGVRYKEKHLHGIVTRIELPSQVTFLNRSALISALEHIIHKDQQLIIDATQ<br>CDSIDPDYQVIQDYQNETAVKRQVLDLKLIGFKQHYEEVDDAVLDIYISTRDLQRKLSQPQVITLL<br>KEGNERFVKNERLQRDIYRQIRVTADEGQHPHIAAVLGCMDSRAPTEMIFDVGIGDLFSLRIAGNIA<br>GQKVLGSLEFACQAKGSKVILVLGHTDCGAVTSACQLRLQKQISDVKEMPHIQYVLPMLMHS<br>VESVYDIMQPRELNKTFVNQVTAMNVHYNIQYIINNSTVLKDLLDRGEIAIVGAIYDVKTGHVEF<br>LDA                                                                                                                                                                                                                                                                                                                                                                                                                                                                                                                                                                                                                                                                                                                                                                                                                                                                                                                                                                                                                                                                                                                                                                                                                                                                                                                                                                                                                                                                                                                                                          | 2.4858844 | 4.06E-05    | up   |
| B0V8Q7     | SLC26A/SulP transporter                               | 6  | 3  | 5   | 3 | 79.9  | MVVFMPALELKNRFHVNDLLSGVVVFLVALPLCLGIALASGAPIISGHIAGIVGGIIVGLSSGSHISV<br>SGPAAGLTAVILVQLDQLGGNYAAFLLCIVFAGILQILFGVFKLGFANFIPNNVILGLLAAIGAILI<br>VTQLPYLFLGLTDFSWKEVWTATPDTFIQKFDAGAALIGLLSFLILAWDSSPLKALPALSAIAVV<br>LAAVFNFLVISIGSSWAVQSNLIQLPNILQAPEEVLVFPDFSYLAEPLIYTGAITLAIVASLETLLN<br>LEAADKLDLPQKRSSPPNRELWAQAGNIVSGLIGMPVTSVIVRSSVNANTGARSKCSTIHHGVL<br>LLLAILFFVPLMNMIPLSALAAAILVTFGKLTHTPKLFLKQLYQKQWRQFLPFIITLVAILLTDLTTLGIL<br>VGLFTSSAFILYGNFNKGVRYKEKHLHGIVTRIELPSQVTFLNRSALISALEHIIHKDQQLIIDATQ<br>CDSIDPDYQVIQDYQNETAVKRQVLDLKLIGFKQHYEEVDDAVLDIYISTRDLQRKLSQPQVITLL<br>KEGNERFVKNERLQRDIYRQIRVTADEGQHPHIAAVLGCMDSRAPTEMIFDVGIGDLFSLRIAGNIA<br>GQKVLGSLEFACQAKGSKVILVLGHTDCGAVTSACQLRLQKQISDVKEMPHIQYVLPMLMHS<br>VESVYDIMQPRELNKTFVNQVTAMNVHYNIQYIINNSTVLKDLLDRGEIAIVGAIYDVKTGHVEF<br>LDA                                                                                                                                                                                                                                                                                                                                                                                                                                                                                                                                                                                                                                                                                                                                                                                                                                                                                                                                                                                                                                                                                                                                                                                                                                                                                                                                                                                                                                                                                                                                                          | 2.4862206 | 0.003102158 | up   |

|        |                                                |    |    |     |    |      |                                                                                                                                                                                                                                                                                                                                                                                                                                                                                                                                                                                                                                                                                                                                                                                                                                                                                                                                                                                                                                                                                                                                                                                                                                                                                                                                                                                                                                                                                                                                                                                                                                                                                                                                                                                                                                                                                                                                                                                                                                                                                                                                                                                               |           |             |      |
|--------|------------------------------------------------|----|----|-----|----|------|-----------------------------------------------------------------------------------------------------------------------------------------------------------------------------------------------------------------------------------------------------------------------------------------------------------------------------------------------------------------------------------------------------------------------------------------------------------------------------------------------------------------------------------------------------------------------------------------------------------------------------------------------------------------------------------------------------------------------------------------------------------------------------------------------------------------------------------------------------------------------------------------------------------------------------------------------------------------------------------------------------------------------------------------------------------------------------------------------------------------------------------------------------------------------------------------------------------------------------------------------------------------------------------------------------------------------------------------------------------------------------------------------------------------------------------------------------------------------------------------------------------------------------------------------------------------------------------------------------------------------------------------------------------------------------------------------------------------------------------------------------------------------------------------------------------------------------------------------------------------------------------------------------------------------------------------------------------------------------------------------------------------------------------------------------------------------------------------------------------------------------------------------------------------------------------------------|-----------|-------------|------|
| B0VNR0 | Arc-like DNA binding domain-containing protein | 27 | 3  | 5   | 3  | 11.7 | MSKNGGHLTVQYNLRWSEELRDKIADEAKKTRSMNQEIARLEHSFRSESASKPFLSFDKDTSHLVIGDAEERKRLAQIAAKAVFDALGQSLDQDDDEKKAP                                                                                                                                                                                                                                                                                                                                                                                                                                                                                                                                                                                                                                                                                                                                                                                                                                                                                                                                                                                                                                                                                                                                                                                                                                                                                                                                                                                                                                                                                                                                                                                                                                                                                                                                                                                                                                                                                                                                                                                                                                                                                         | 3.1586265 | 1.78E-05    | up   |
| B0VQQ0 | NAD(P)-binding domain-containing protein       | 3  | 1  | 3   | 1  | 30.9 | MHILFIGYGKTSQRVAKQLFEKGHQITTSRSEKTDPTYGTHLVQDIFTLDLSEIAPVDVYVILLSPD<br>DSTVEGYQHTYVDSIEPIRQALKSHPVKRLIVVSSSTRVYGENSGETIDDHSEIHPNDAQGHILHNM<br>ELLWQKYFPPSQCVIVRPTGIYGASIDCLKRMAEHTQTYPNIHYSNRHIDDLARFLAFLADFEKPH<br>KSYLVANNAPVPLHEVLLWFQSQLDLPLLLDLSAHVSGKKIYAKHLFETGFQLEHPICFNDYLLC<br>LNAHGTV                                                                                                                                                                                                                                                                                                                                                                                                                                                                                                                                                                                                                                                                                                                                                                                                                                                                                                                                                                                                                                                                                                                                                                                                                                                                                                                                                                                                                                                                                                                                                                                                                                                                                                                                                                                                                                                                                              | 2.0556358 | 0.000501151 | up   |
| B0VR23 | Regulatory protein RecX                        | 42 | 2  | 3   | 2  | 8.7  | MSFWQKFLFADQQHNEHKNQTACVENDCCKTNEQLLSALAQAATDEDVIKGIKKVLISRGYSR<br>KELNELTQKTSIH<br>MSLLRLDRLHYCILMSMGCISSPLVWAEDLNSDVAKLPTLHVEATRDTGTGYLQTPASVFRIEAPQ<br>VDSSSQVNLTEVVKGIPSLQIRNRENYAODLQLSMRGFGARSTFGVVRGIRLYVDGIPATMPDQG<br>GQTSNIDLSSLDHVEVLTGPFSSLYGNSSGGTILTSTKEGQGGKDSIELSYSGSHDKSRAGLVLQG<br>GAKGANEPSYIISSSYFDTDGYREHSGAEKVLNNAKLSWNLDDGSKINWVTNYVKINADDPGGL<br>TRADWQNNPKQVVQNVLDYNARKEIEQTQTGLTWSKPINDQHELAMTYMGQRQVTVQYQSP<br>DTVQKNPNTPYQAGGVDFKRNYYGADFRWTGKELLPNTTSLIGVALDAMKEDRQYQNFND<br>TGDKGKVGALRRDEDNTLWNIDPYVQASWQFLPTWRLDTGVRYSNVHYKSKDYIVLNGDN<br>SGKTSYEEVLPVSVALSWQITPEVLAYASYAKGFETPTFTEMAYPAQGGASTLDLKPSTSDTYETG<br>LKSQNLGDFTLAVFQTKTKNDIVSAESFGGRSTFRNADKTLREGVEFAWNKKLWRDLIAIASY<br>TYLDAATFDSTVPAAGKISEIPEGNAIPGIAKNQAYVSLAWQPSHGLYGGVDVQYMDKYVYVNDT<br>NSDAAPSYSVTSANVGYAWVMGDWKNVNSFARVDNLFDNRNAGSVIVNDSTQPVGRYFEPADG<br>RNWSAGLRVIKQF                                                                                                                                                                                                                                                                                                                                                                                                                                                                                                                                                                                                                                                                                                                                                                                                                                                                                                                                                                                                                                                                                                                                                                                                                                                                                                                      | 0.4503444 | 0.000636543 | down |
| B0VRV5 | TonB-dependent receptor protein                | 31 | 16 | 25  | 7  | 78.7 | MNYSLDSNFRLLIDCNEAEHAVAILEILNDAIVNSTALYDYVPRSLDSMKTWFSVKRENGFPVIGV<br>VDELGKLLGFASWGTFRAFPAYKYTVVHSIYIHHEHRGCGLSKVLMLQALIQRAQQAQLHVLIGCI<br>DATNQASIGLHEKMGFTHAGTFKQVGFKFGQWLDAAFYQLILNTPFEPVDG<br>MYRTIETILVDIPTIRPHQLSVTTMRTQTLVVLKITTTDGVGWGEATTIGGLNYGEESPESVKAN<br>IDTYFAPLLASVKDLNVAQTLKLRKNINGNRFKAKCAIQTALLDIQAKRLSVPLSEVLGGRLRDSL<br>PVLWTLASGDTEKDIAEARKMIELKRHNTFKLKIGSRPLQHDVDHVIAIKKALGADVSVRVDVN<br>RAWSELECIHQIQLQDGGIDLIEQPCAIQNTALARLTQRFDVAIMADEALTGPDSAYRIAKNH<br>GADVFAVKIEQSGGLIEACEVKGIAGLAGIDLGGTMEGPGVSIASAHVVFATFELAFGTFLFPG<br>LLLTEEILKEPLRYENFELHLPTAPGLGIEIDEDKIEKLRR<br>MYSGRSEFTGINMQLYDKKTIFILPMLAAMVAVSGCQPKSTAKDEQPASSASVKEQKQAEVPI<br>QAKVVPVKLPKPKVCLEDGCTEYDFQTVQTNQK WINDYFTNRIKKADPNANLADKPVEVPE<br>GEPSSSQAIVRYLGLQYNLATAFAFQTYSSYAGAAHGMSHQEFVNFLLNKKHITVEELIKPDV<br>EKQLVDALFDANTNWLQEHNISREKLQSLDNFYGGANGIVFVYPIYELASYAEGMSELTLPYFE<br>AAKYIKPEYLPSPNYNL<br>MHYSLKKRLIWGTSIFSIVLGCILIFSAYKVALQEVEILDQMKYLAERTAETHPLKTVSSKFDH<br>KTYHEEDLFDIWAYKDAQHLSHHLLHLLVPPVEQAGFYSHKTAQGIVRTYVPLPKDYQIQVSQQ<br>ERVREAFAWELAGSMFIPYLILPFAIFALAAIIRRLKPIDDFKNELKERDSEELTPIEVHDYPPQEL<br>LPTIDEMNRLFERISKAQNEQKQFIADAAHELTPVIALNLQTKILLSQFPEHESLQNLKGLARIQ<br>HLVTQLLALAKQDVTLSMVEPTGYFQLNDVALNCVEQLVNLAMQKEIDLGFVRNEPIEMHSIEP<br>TVHSIIFNLIDNAIKYTPHQGVINISVYTDPDHYACIQIEDSGAGIDPENYDKVLKRFYRVHHHLE<br>VGSGLGLSIVDRATQRLGGTLTLDKSLELGGLSVLVKLPKVLHLHETRA<br>MTQKNELDTKYAVIVAGGNGAGKSTLIDNVIIPKFNSLNLINFINADVWQLQHFHGFHDNTNPT<br>HAREAQWAEAERQKHLDEGRSFAETVFSHPKVDLIKEAKSKGFYVVL YHIHLENSDIALDRI<br>KDRVRKGGHDVDEDKVKARYERVPLVAEATQYADLTFVLDNSVRDRPHQQVFKLEYGKITAI<br>DNNVPDWAIKAYEKQLTDYLGDLQATKISNTNEDLTMSTNEKELGFEYNARLLANDIQPHRE<br>TVVANRKNFVEHVANSAAVAGNSHKLDDVASLINGTTVGGHSVKDQRQVNLIDASQNLVSN<br>MVRNGNFALNKSTYLLKVNIGVADRESIEAGVLRGEGVEQSFTPDVGIRHFRTHRPMKTEEDAPA<br>LNKFMQEGFDHINSLKNPLEKGIATFLYGSNLQFTFEGEKRTAHLMMNGVLSMAGLDAISIPAD<br>KAIDFRQKMVRFYESKNADEVMEFLADLHPALNNTKKLDAEKEKSENDFGRSFQ<br>MNLEQVRLVDEAITSRHSVRAFLSTPIEPEIHKDILRVASRAPSGTNTQPWKVYVVTGYKRDEMV<br>ERVCAAQIEVSKNPELAEQYKETFAYYPEK WVSFIDRRRENGWGLYGLLDIKKKEKEMAAQ<br>QLRNFKLFDAVPVGIFFTVNKAMGIGSKMDIAMMIQNVMAAKARGLDTCQAAWNHFHPLVL<br>DILGAADDEELVCAIALGHADPEHIVNTFITPREPVENFAVFLD | 0.3119711 | 0.002570096 | down |
| C7FEK7 | Acetyltransferase (GNAT) family protein        | 43 | 5  | 8   | 5  | 20.3 | MNYSLDSNFRLLIDCNEAEHAVAILEILNDAIVNSTALYDYVPRSLDSMKTWFSVKRENGFPVIGV<br>VDELGKLLGFASWGTFRAFPAYKYTVVHSIYIHHEHRGCGLSKVLMLQALIQRAQQAQLHVLIGCI<br>DATNQASIGLHEKMGFTHAGTFKQVGFKFGQWLDAAFYQLILNTPFEPVDG<br>MYRTIETILVDIPTIRPHQLSVTTMRTQTLVVLKITTTDGVGWGEATTIGGLNYGEESPESVKAN<br>IDTYFAPLLASVKDLNVAQTLKLRKNINGNRFKAKCAIQTALLDIQAKRLSVPLSEVLGGRLRDSL<br>PVLWTLASGDTEKDIAEARKMIELKRHNTFKLKIGSRPLQHDVDHVIAIKKALGADVSVRVDVN<br>RAWSELECIHQIQLQDGGIDLIEQPCAIQNTALARLTQRFDVAIMADEALTGPDSAYRIAKNH<br>GADVFAVKIEQSGGLIEACEVKGIAGLAGIDLGGTMEGPGVSIASAHVVFATFELAFGTFLFPG<br>LLLTEEILKEPLRYENFELHLPTAPGLGIEIDEDKIEKLRR<br>MYSGRSEFTGINMQLYDKKTIFILPMLAAMVAVSGCQPKSTAKDEQPASSASVKEQKQAEVPI<br>QAKVVPVKLPKPKVCLEDGCTEYDFQTVQTNQK WINDYFTNRIKKADPNANLADKPVEVPE<br>GEPSSSQAIVRYLGLQYNLATAFAFQTYSSYAGAAHGMSHQEFVNFLLNKKHITVEELIKPDV<br>EKQLVDALFDANTNWLQEHNISREKLQSLDNFYGGANGIVFVYPIYELASYAEGMSELTLPYFE<br>AAKYIKPEYLPSPNYNL<br>MHYSLKKRLIWGTSIFSIVLGCILIFSAYKVALQEVEILDQMKYLAERTAETHPLKTVSSKFDH<br>KTYHEEDLFDIWAYKDAQHLSHHLLHLLVPPVEQAGFYSHKTAQGIVRTYVPLPKDYQIQVSQQ<br>ERVREAFAWELAGSMFIPYLILPFAIFALAAIIRRLKPIDDFKNELKERDSEELTPIEVHDYPPQEL<br>LPTIDEMNRLFERISKAQNEQKQFIADAAHELTPVIALNLQTKILLSQFPEHESLQNLKGLARIQ<br>HLVTQLLALAKQDVTLSMVEPTGYFQLNDVALNCVEQLVNLAMQKEIDLGFVRNEPIEMHSIEP<br>TVHSIIFNLIDNAIKYTPHQGVINISVYTDPDHYACIQIEDSGAGIDPENYDKVLKRFYRVHHHLE<br>VGSGLGLSIVDRATQRLGGTLTLDKSLELGGLSVLVKLPKVLHLHETRA<br>MTQKNELDTKYAVIVAGGNGAGKSTLIDNVIIPKFNSLNLINFINADVWQLQHFHGFHDNTNPT<br>HAREAQWAEAERQKHLDEGRSFAETVFSHPKVDLIKEAKSKGFYVVL YHIHLENSDIALDRI<br>KDRVRKGGHDVDEDKVKARYERVPLVAEATQYADLTFVLDNSVRDRPHQQVFKLEYGKITAI<br>DNNVPDWAIKAYEKQLTDYLGDLQATKISNTNEDLTMSTNEKELGFEYNARLLANDIQPHRE<br>TVVANRKNFVEHVANSAAVAGNSHKLDDVASLINGTTVGGHSVKDQRQVNLIDASQNLVSN<br>MVRNGNFALNKSTYLLKVNIGVADRESIEAGVLRGEGVEQSFTPDVGIRHFRTHRPMKTEEDAPA<br>LNKFMQEGFDHINSLKNPLEKGIATFLYGSNLQFTFEGEKRTAHLMMNGVLSMAGLDAISIPAD<br>KAIDFRQKMVRFYESKNADEVMEFLADLHPALNNTKKLDAEKEKSENDFGRSFQ<br>MNLEQVRLVDEAITSRHSVRAFLSTPIEPEIHKDILRVASRAPSGTNTQPWKVYVVTGYKRDEMV<br>ERVCAAQIEVSKNPELAEQYKETFAYYPEK WVSFIDRRRENGWGLYGLLDIKKKEKEMAAQ<br>QLRNFKLFDAVPVGIFFTVNKAMGIGSKMDIAMMIQNVMAAKARGLDTCQAAWNHFHPLVL<br>DILGAADDEELVCAIALGHADPEHIVNTFITPREPVENFAVFLD | 2.1628808 | 0.009292239 | up   |
| D0C6V6 | Muconate cycloisomerase 1                      | 44 | 9  | 14  | 1  | 40.2 | MNYSLDSNFRLLIDCNEAEHAVAILEILNDAIVNSTALYDYVPRSLDSMKTWFSVKRENGFPVIGV<br>VDELGKLLGFASWGTFRAFPAYKYTVVHSIYIHHEHRGCGLSKVLMLQALIQRAQQAQLHVLIGCI<br>DATNQASIGLHEKMGFTHAGTFKQVGFKFGQWLDAAFYQLILNTPFEPVDG<br>MYRTIETILVDIPTIRPHQLSVTTMRTQTLVVLKITTTDGVGWGEATTIGGLNYGEESPESVKAN<br>IDTYFAPLLASVKDLNVAQTLKLRKNINGNRFKAKCAIQTALLDIQAKRLSVPLSEVLGGRLRDSL<br>PVLWTLASGDTEKDIAEARKMIELKRHNTFKLKIGSRPLQHDVDHVIAIKKALGADVSVRVDVN<br>RAWSELECIHQIQLQDGGIDLIEQPCAIQNTALARLTQRFDVAIMADEALTGPDSAYRIAKNH<br>GADVFAVKIEQSGGLIEACEVKGIAGLAGIDLGGTMEGPGVSIASAHVVFATFELAFGTFLFPG<br>LLLTEEILKEPLRYENFELHLPTAPGLGIEIDEDKIEKLRR<br>MYSGRSEFTGINMQLYDKKTIFILPMLAAMVAVSGCQPKSTAKDEQPASSASVKEQKQAEVPI<br>QAKVVPVKLPKPKVCLEDGCTEYDFQTVQTNQK WINDYFTNRIKKADPNANLADKPVEVPE<br>GEPSSSQAIVRYLGLQYNLATAFAFQTYSSYAGAAHGMSHQEFVNFLLNKKHITVEELIKPDV<br>EKQLVDALFDANTNWLQEHNISREKLQSLDNFYGGANGIVFVYPIYELASYAEGMSELTLPYFE<br>AAKYIKPEYLPSPNYNL<br>MHYSLKKRLIWGTSIFSIVLGCILIFSAYKVALQEVEILDQMKYLAERTAETHPLKTVSSKFDH<br>KTYHEEDLFDIWAYKDAQHLSHHLLHLLVPPVEQAGFYSHKTAQGIVRTYVPLPKDYQIQVSQQ<br>ERVREAFAWELAGSMFIPYLILPFAIFALAAIIRRLKPIDDFKNELKERDSEELTPIEVHDYPPQEL<br>LPTIDEMNRLFERISKAQNEQKQFIADAAHELTPVIALNLQTKILLSQFPEHESLQNLKGLARIQ<br>HLVTQLLALAKQDVTLSMVEPTGYFQLNDVALNCVEQLVNLAMQKEIDLGFVRNEPIEMHSIEP<br>TVHSIIFNLIDNAIKYTPHQGVINISVYTDPDHYACIQIEDSGAGIDPENYDKVLKRFYRVHHHLE<br>VGSGLGLSIVDRATQRLGGTLTLDKSLELGGLSVLVKLPKVLHLHETRA<br>MTQKNELDTKYAVIVAGGNGAGKSTLIDNVIIPKFNSLNLINFINADVWQLQHFHGFHDNTNPT<br>HAREAQWAEAERQKHLDEGRSFAETVFSHPKVDLIKEAKSKGFYVVL YHIHLENSDIALDRI<br>KDRVRKGGHDVDEDKVKARYERVPLVAEATQYADLTFVLDNSVRDRPHQQVFKLEYGKITAI<br>DNNVPDWAIKAYEKQLTDYLGDLQATKISNTNEDLTMSTNEKELGFEYNARLLANDIQPHRE<br>TVVANRKNFVEHVANSAAVAGNSHKLDDVASLINGTTVGGHSVKDQRQVNLIDASQNLVSN<br>MVRNGNFALNKSTYLLKVNIGVADRESIEAGVLRGEGVEQSFTPDVGIRHFRTHRPMKTEEDAPA<br>LNKFMQEGFDHINSLKNPLEKGIATFLYGSNLQFTFEGEKRTAHLMMNGVLSMAGLDAISIPAD<br>KAIDFRQKMVRFYESKNADEVMEFLADLHPALNNTKKLDAEKEKSENDFGRSFQ<br>MNLEQVRLVDEAITSRHSVRAFLSTPIEPEIHKDILRVASRAPSGTNTQPWKVYVVTGYKRDEMV<br>ERVCAAQIEVSKNPELAEQYKETFAYYPEK WVSFIDRRRENGWGLYGLLDIKKKEKEMAAQ<br>QLRNFKLFDAVPVGIFFTVNKAMGIGSKMDIAMMIQNVMAAKARGLDTCQAAWNHFHPLVL<br>DILGAADDEELVCAIALGHADPEHIVNTFITPREPVENFAVFLD | 3.0748731 | 6.46E-05    | up   |
| D0CDQ9 | DUF3298 domain-containing protein              | 43 | 7  | 24  | 1  | 30.9 | MNYSLDSNFRLLIDCNEAEHAVAILEILNDAIVNSTALYDYVPRSLDSMKTWFSVKRENGFPVIGV<br>VDELGKLLGFASWGTFRAFPAYKYTVVHSIYIHHEHRGCGLSKVLMLQALIQRAQQAQLHVLIGCI<br>DATNQASIGLHEKMGFTHAGTFKQVGFKFGQWLDAAFYQLILNTPFEPVDG<br>MYRTIETILVDIPTIRPHQLSVTTMRTQTLVVLKITTTDGVGWGEATTIGGLNYGEESPESVKAN<br>IDTYFAPLLASVKDLNVAQTLKLRKNINGNRFKAKCAIQTALLDIQAKRLSVPLSEVLGGRLRDSL<br>PVLWTLASGDTEKDIAEARKMIELKRHNTFKLKIGSRPLQHDVDHVIAIKKALGADVSVRVDVN<br>RAWSELECIHQIQLQDGGIDLIEQPCAIQNTALARLTQRFDVAIMADEALTGPDSAYRIAKNH<br>GADVFAVKIEQSGGLIEACEVKGIAGLAGIDLGGTMEGPGVSIASAHVVFATFELAFGTFLFPG<br>LLLTEEILKEPLRYENFELHLPTAPGLGIEIDEDKIEKLRR<br>MYSGRSEFTGINMQLYDKKTIFILPMLAAMVAVSGCQPKSTAKDEQPASSASVKEQKQAEVPI<br>QAKVVPVKLPKPKVCLEDGCTEYDFQTVQTNQK WINDYFTNRIKKADPNANLADKPVEVPE<br>GEPSSSQAIVRYLGLQYNLATAFAFQTYSSYAGAAHGMSHQEFVNFLLNKKHITVEELIKPDV<br>EKQLVDALFDANTNWLQEHNISREKLQSLDNFYGGANGIVFVYPIYELASYAEGMSELTLPYFE<br>AAKYIKPEYLPSPNYNL<br>MHYSLKKRLIWGTSIFSIVLGCILIFSAYKVALQEVEILDQMKYLAERTAETHPLKTVSSKFDH<br>KTYHEEDLFDIWAYKDAQHLSHHLLHLLVPPVEQAGFYSHKTAQGIVRTYVPLPKDYQIQVSQQ<br>ERVREAFAWELAGSMFIPYLILPFAIFALAAIIRRLKPIDDFKNELKERDSEELTPIEVHDYPPQEL<br>LPTIDEMNRLFERISKAQNEQKQFIADAAHELTPVIALNLQTKILLSQFPEHESLQNLKGLARIQ<br>HLVTQLLALAKQDVTLSMVEPTGYFQLNDVALNCVEQLVNLAMQKEIDLGFVRNEPIEMHSIEP<br>TVHSIIFNLIDNAIKYTPHQGVINISVYTDPDHYACIQIEDSGAGIDPENYDKVLKRFYRVHHHLE<br>VGSGLGLSIVDRATQRLGGTLTLDKSLELGGLSVLVKLPKVLHLHETRA<br>MTQKNELDTKYAVIVAGGNGAGKSTLIDNVIIPKFNSLNLINFINADVWQLQHFHGFHDNTNPT<br>HAREAQWAEAERQKHLDEGRSFAETVFSHPKVDLIKEAKSKGFYVVL YHIHLENSDIALDRI<br>KDRVRKGGHDVDEDKVKARYERVPLVAEATQYADLTFVLDNSVRDRPHQQVFKLEYGKITAI<br>DNNVPDWAIKAYEKQLTDYLGDLQATKISNTNEDLTMSTNEKELGFEYNARLLANDIQPHRE<br>TVVANRKNFVEHVANSAAVAGNSHKLDDVASLINGTTVGGHSVKDQRQVNLIDASQNLVSN<br>MVRNGNFALNKSTYLLKVNIGVADRESIEAGVLRGEGVEQSFTPDVGIRHFRTHRPMKTEEDAPA<br>LNKFMQEGFDHINSLKNPLEKGIATFLYGSNLQFTFEGEKRTAHLMMNGVLSMAGLDAISIPAD<br>KAIDFRQKMVRFYESKNADEVMEFLADLHPALNNTKKLDAEKEKSENDFGRSFQ<br>MNLEQVRLVDEAITSRHSVRAFLSTPIEPEIHKDILRVASRAPSGTNTQPWKVYVVTGYKRDEMV<br>ERVCAAQIEVSKNPELAEQYKETFAYYPEK WVSFIDRRRENGWGLYGLLDIKKKEKEMAAQ<br>QLRNFKLFDAVPVGIFFTVNKAMGIGSKMDIAMMIQNVMAAKARGLDTCQAAWNHFHPLVL<br>DILGAADDEELVCAIALGHADPEHIVNTFITPREPVENFAVFLD | 16.16189  | 1.21E-05    | up   |
| G1CBP8 | histidine kinase PmrB                          | 32 | 10 | 23  | 10 | 50.7 | MNYSLDSNFRLLIDCNEAEHAVAILEILNDAIVNSTALYDYVPRSLDSMKTWFSVKRENGFPVIGV<br>VDELGKLLGFASWGTFRAFPAYKYTVVHSIYIHHEHRGCGLSKVLMLQALIQRAQQAQLHVLIGCI<br>DATNQASIGLHEKMGFTHAGTFKQVGFKFGQWLDAAFYQLILNTPFEPVDG<br>MYRTIETILVDIPTIRPHQLSVTTMRTQTLVVLKITTTDGVGWGEATTIGGLNYGEESPESVKAN<br>IDTYFAPLLASVKDLNVAQTLKLRKNINGNRFKAKCAIQTALLDIQAKRLSVPLSEVLGGRLRDSL<br>PVLWTLASGDTEKDIAEARKMIELKRHNTFKLKIGSRPLQHDVDHVIAIKKALGADVSVRVDVN<br>RAWSELECIHQIQLQDGGIDLIEQPCAIQNTALARLTQRFDVAIMADEALTGPDSAYRIAKNH<br>GADVFAVKIEQSGGLIEACEVKGIAGLAGIDLGGTMEGPGVSIASAHVVFATFELAFGTFLFPG<br>LLLTEEILKEPLRYENFELHLPTAPGLGIEIDEDKIEKLRR<br>MYSGRSEFTGINMQLYDKKTIFILPMLAAMVAVSGCQPKSTAKDEQPASSASVKEQKQAEVPI<br>QAKVVPVKLPKPKVCLEDGCTEYDFQTVQTNQK WINDYFTNRIKKADPNANLADKPVEVPE<br>GEPSSSQAIVRYLGLQYNLATAFAFQTYSSYAGAAHGMSHQEFVNFLLNKKHITVEELIKPDV<br>EKQLVDALFDANTNWLQEHNISREKLQSLDNFYGGANGIVFVYPIYELASYAEGMSELTLPYFE<br>AAKYIKPEYLPSPNYNL<br>MHYSLKKRLIWGTSIFSIVLGCILIFSAYKVALQEVEILDQMKYLAERTAETHPLKTVSSKFDH<br>KTYHEEDLFDIWAYKDAQHLSHHLLHLLVPPVEQAGFYSHKTAQGIVRTYVPLPKDYQIQVSQQ<br>ERVREAFAWELAGSMFIPYLILPFAIFALAAIIRRLKPIDDFKNELKERDSEELTPIEVHDYPPQEL<br>LPTIDEMNRLFERISKAQNEQKQFIADAAHELTPVIALNLQTKILLSQFPEHESLQNLKGLARIQ<br>HLVTQLLALAKQDVTLSMVEPTGYFQLNDVALNCVEQLVNLAMQKEIDLGFVRNEPIEMHSIEP<br>TVHSIIFNLIDNAIKYTPHQGVINISVYTDPDHYACIQIEDSGAGIDPENYDKVLKRFYRVHHHLE<br>VGSGLGLSIVDRATQRLGGTLTLDKSLELGGLSVLVKLPKVLHLHETRA<br>MTQKNELDTKYAVIVAGGNGAGKSTLIDNVIIPKFNSLNLINFINADVWQLQHFHGFHDNTNPT<br>HAREAQWAEAERQKHLDEGRSFAETVFSHPKVDLIKEAKSKGFYVVL YHIHLENSDIALDRI<br>KDRVRKGGHDVDEDKVKARYERVPLVAEATQYADLTFVLDNSVRDRPHQQVFKLEYGKITAI<br>DNNVPDWAIKAYEKQLTDYLGDLQATKISNTNEDLTMSTNEKELGFEYNARLLANDIQPHRE<br>TVVANRKNFVEHVANSAAVAGNSHKLDDVASLINGTTVGGHSVKDQRQVNLIDASQNLVSN<br>MVRNGNFALNKSTYLLKVNIGVADRESIEAGVLRGEGVEQSFTPDVGIRHFRTHRPMKTEEDAPA<br>LNKFMQEGFDHINSLKNPLEKGIATFLYGSNLQFTFEGEKRTAHLMMNGVLSMAGLDAISIPAD<br>KAIDFRQKMVRFYESKNADEVMEFLADLHPALNNTKKLDAEKEKSENDFGRSFQ<br>MNLEQVRLVDEAITSRHSVRAFLSTPIEPEIHKDILRVASRAPSGTNTQPWKVYVVTGYKRDEMV<br>ERVCAAQIEVSKNPELAEQYKETFAYYPEK WVSFIDRRRENGWGLYGLLDIKKKEKEMAAQ<br>QLRNFKLFDAVPVGIFFTVNKAMGIGSKMDIAMMIQNVMAAKARGLDTCQAAWNHFHPLVL<br>DILGAADDEELVCAIALGHADPEHIVNTFITPREPVENFAVFLD | 2.9264585 | 1.58E-06    | up   |
| H6VX66 | Zeta toxin                                     | 63 | 25 | 228 | 25 | 56.3 | MNYSLDSNFRLLIDCNEAEHAVAILEILNDAIVNSTALYDYVPRSLDSMKTWFSVKRENGFPVIGV<br>VDELGKLLGFASWGTFRAFPAYKYTVVHSIYIHHEHRGCGLSKVLMLQALIQRAQQAQLHVLIGCI<br>DATNQASIGLHEKMGFTHAGTFKQVGFKFGQWLDAAFYQLILNTPFEPVDG<br>MYRTIETILVDIPTIRPHQLSVTTMRTQTLVVLKITTTDGVGWGEATTIGGLNYGEESPESVKAN<br>IDTYFAPLLASVKDLNVAQTLKLRKNINGNRFKAKCAIQTALLDIQAKRLSVPLSEVLGGRLRDSL<br>PVLWTLASGDTEKDIAEARKMIELKRHNTFKLKIGSRPLQHDVDHVIAIKKALGADVSVRVDVN<br>RAWSELECIHQIQLQDGGIDLIEQPCAIQNTALARLTQRFDVAIMADEALTGPDSAYRIAKNH<br>GADVFAVKIEQSGGLIEACEVKGIAGLAGIDLGGTMEGPGVSIASAHVVFATFELAFGTFLFPG<br>LLLTEEILKEPLRYENFELHLPTAPGLGIEIDEDKIEKLRR<br>MYSGRSEFTGINMQLYDKKTIFILPMLAAMVAVSGCQPKSTAKDEQPASSASVKEQKQAEVPI<br>QAKVVPVKLPKPKVCLEDGCTEYDFQTVQTNQK WINDYFTNRIKKADPNANLADKPVEVPE<br>GEPSSSQAIVRYLGLQYNLATAFAFQTYSSYAGAAHGMSHQEFVNFLLNKKHITVEELIKPDV<br>EKQLVDALFDANTNWLQEHNISREKLQSLDNFYGGANGIVFVYPIYELASYAEGMSELTLPYFE<br>AAKYIKPEYLPSPNYNL<br>MHYSLKKRLIWGTSIFSIVLGCILIFSAYKVALQEVEILDQMKYLAERTAETHPLKTVSSKFDH<br>KTYHEEDLFDIWAYKDAQHLSHHLLHLLVPPVEQAGFYSHKTAQGIVRTYVPLPKDYQIQVSQQ<br>ERVREAFAWELAGSMFIPYLILPFAIFALAAIIRRLKPIDDFKNELKERDSEELTPIEVHDYPPQEL<br>LPTIDEMNRLFERISKAQNEQKQFIADAAHELTPVIALNLQTKILLSQFPEHESLQNLKGLARIQ<br>HLVTQLLALAKQDVTLSMVEPTGYFQLNDVALNCVEQLVNLAMQKEIDLGFVRNEPIEMHSIEP<br>TVHSIIFNLIDNAIKYTPHQGVINISVYTDPDHYACIQIEDSGAGIDPENYDKVLKRFYRVHHHLE<br>VGSGLGLSIVDRATQRLGGTLTLDKSLELGGLSVLVKLPKVLHLHETRA<br>MTQKNELDTKYAVIVAGGNGAGKSTLIDNVIIPKFNSLNLINFINADVWQLQHFHGFHDNTNPT<br>HAREAQWAEAERQKHLDEGRSFAETVFSHPKVDLIKEAKSKGFYVVL YHIHLENSDIALDRI<br>KDRVRKGGHDVDEDKVKARYERVPLVAEATQYADLTFVLDNSVRDRPHQQVFKLEYGKITAI<br>DNNVPDWAIKAYEKQLTDYLGDLQATKISNTNEDLTMSTNEKELGFEYNARLLANDIQPHRE<br>TVVANRKNFVEHVANSAAVAGNSHKLDDVASLINGTTVGGHSVKDQRQVNLIDASQNLVSN<br>MVRNGNFALNKSTYLLKVNIGVADRESIEAGVLRGEGVEQSFTPDVGIRHFRTHRPMKTEEDAPA<br>LNKFMQEGFDHINSLKNPLEKGIATFLYGSNLQFTFEGEKRTAHLMMNGVLSMAGLDAISIPAD<br>KAIDFRQKMVRFYESKNADEVMEFLADLHPALNNTKKLDAEKEKSENDFGRSFQ<br>MNLEQVRLVDEAITSRHSVRAFLSTPIEPEIHKDILRVASRAPSGTNTQPWKVYVVTGYKRDEMV<br>ERVCAAQIEVSKNPELAEQYKETFAYYPEK WVSFIDRRRENGWGLYGLLDIKKKEKEMAAQ<br>QLRNFKLFDAVPVGIFFTVNKAMGIGSKMDIAMMIQNVMAAKARGLDTCQAAWNHFHPLVL<br>DILGAADDEELVCAIALGHADPEHIVNTFITPREPVENFAVFLD | 2.0732884 | 0.009928293 | up   |
| N9JQM5 | Nitroreductase domain-containing protein       | 56 | 13 | 26  | 2  | 26.4 | MNYSLDSNFRLLIDCNEAEHAVAILEILNDAIVNSTALYDYVPRSLDSMKTWFSVKRENGFPVIGV<br>VDELGKLLGFASWGTFRAFPAYKYTVVHSIYIHHEHRGCGLSKVLMLQALIQRAQQAQLHVLIGCI<br>DATNQASIGLHEKMGFTHAGTFKQVGFKFGQWLDAAFYQLILNTPFEPVDG<br>MYRTIETILVDIPTIRPHQLSVTTMRTQTLVVLKITTTDGVGWGEATTIGGLNYGEESPESVKAN<br>IDTYFAPLLASVKDLNVAQTLKLRKNINGNRFKAKCAIQTALLDIQAKRLSVPLSEVLGGRLRDSL<br>PVLWTLASGDTEKDIAEARKMIELKRHNTFKLKIGSRPLQHDVDHVIAIKKALGADVSVRVDVN<br>RAWSELECIHQIQLQDGGIDLIEQPCAIQNTALARLTQRFDVAIMADEALTGPDSAYRIAKNH<br>GADVFAVKIEQSGGLIEACEVKGIAGLAGIDLGGTMEGPGVSIASAHVVFATFELAFGTFLFPG<br>LLLTEEILKEPLRYENFELHLPTAPGLGIEIDEDKIEKLRR<br>MYSGRSEFTGINMQLYDKKTIFILPMLAAMVAVSGCQPKSTAKDEQPASSASVKEQKQAEVPI<br>QAKVVPVKLPKPKVCLEDGCTEYDFQTVQTNQK WINDYFTNRIKKADPNANLADKPVEVPE<br>GEPSSSQAIVRYLGLQYNLATAFAFQTYSSYAGAAHGMSHQEFVNFLLNKKHITVEELIKPDV<br>EKQLVDALFDANTNWLQEHNISREKLQSLDNFYGGANGIVFVYPIYELASYAEGMSELTLPYFE<br>AAKYIKPEYLPSPNYNL<br>MHYSLKKRLIWGTSIFSIVLGCILIFSAYKVALQEVEILDQMKYLAERTAETHPLKTVSSKFDH<br>KTYHEEDLFDIWAYKDAQHLSHHLLHLLVPPVEQAGFYSHKTAQGIVRTYVPLPKDYQIQVSQQ<br>ERVREAFAWELAGSMFIPYLILPFAIFALAAIIRRLKPIDDFKNELKERDSEELTPIEVHDYPPQEL<br>LPTIDEMNRLFERISKAQNEQKQFIADAAHELTPVIALNLQTKILLSQFPEHESLQNLKGLARIQ<br>HLVTQLLALAKQDVTLSMVEPTGYFQLNDVALNCVEQLVNLAMQKEIDLGFVRNEPIEMHSIEP<br>TVHSIIFNLIDNAIKYTPHQGVINISVYTDPDHYACIQIEDSGAGIDPENYDKVLKRFYRVHHHLE<br>VGSGLGLSIVDRATQRLGGTLTLDKSLELGGLSVLVKLPKVLHLHETRA<br>MTQKNELDTKYAVIVAGGNGAGKSTLIDNVIIPKFNSLNLINFINADVWQLQHFHGFHDNTNPT<br>HAREAQWAEAERQKHLDEGRSFAETVFSHPKVDLIKEAKSKGFYVVL YHIHLENSDIALDRI<br>KDRVRKGGHDVDEDKVKARYERVPLVAEATQYADLTFVLDNSVRDRPHQQVFKLEYGKITAI<br>DNNVPDWAIKAYEKQLTDYLGDLQATKISNTNEDLTMSTNEKELGFEYNARLLANDIQPHRE<br>TVVANRKNFVEHVANSAAVAGNSHKLDDVASLINGTTVGGHSVKDQRQVNLIDASQNLVSN<br>MVRNGNFALNKSTYLLKVNIGVADRESIEAGVLRGEGVEQSFTPDVGIRHFRTHRPMKTEEDAPA<br>LNKFMQEGFDHINSLKNPLEKGIATFLYGSNLQFTFEGEKRTAHLMMNGVLSMAGLDAISIPAD<br>KAIDFRQKMVRFYESKNADEVMEFLADLHPALNNTKKLDAEKEKSENDFGRSFQ<br>MNLEQVRLVDEAITSRHSVRAFLSTPIEPEIHKDILRVASRAPSGTNTQPWKVYVVTGYKRDEMV<br>ERVCAAQIEVSKNPELAEQYKETFAYYPEK WVSFIDRRRENGWGLYGLLDIKKKEKEMAAQ<br>QLRNFKLFDAVPVGIFFTVNKAMGIGSKMDIAMMIQNVMAAKARGLDTCQAAWNHFHPLVL<br>DILGAADDEELVCAIALGHADPEHIVNTFITPREPVENFAVFLD | 0.1053083 | 0.00149368  | down |

|        |                                                            |    |    |     |    |      |                                                                                                                                                                                                                                                                                                                                                                                                                                                                                                          |           |             |      |
|--------|------------------------------------------------------------|----|----|-----|----|------|----------------------------------------------------------------------------------------------------------------------------------------------------------------------------------------------------------------------------------------------------------------------------------------------------------------------------------------------------------------------------------------------------------------------------------------------------------------------------------------------------------|-----------|-------------|------|
| N9JQN7 | Aspartyl/glutamyl-tRNA(Asn/Gln) amidotransferase subunit B | 81 | 29 | 147 | 1  | 53.7 | MAEAQKLKLDGWEVVGIEIHTQLATNSKIFSGSSTEFQDPNTQASLVDLAMPGVLPVNLKEKVELAIRFGLGIDAYIDQASVFARKNYFYPDSPKGYQISQMDNPVGLGHIDIQLEDGTTKRIGVTRAHLEEDAGKSVHDQFEGMSSGIDLNRAGTPLLEIVSEPDMRVVEEAVAYIKAIHTLVRWLGISDGNMAEGSFRADCNVSLRRPQPGFTRCELKNLNSFRFIEQAINVEIERQMEILEWGGIEDQETRLFDPNKMETRSMRSKEEANDYRYPDPDLLPVIIPDEQIEAIKATMPELPAARRARFIADFGVTEYDAHVLTLTREMADFYEAUVAAAGGAKQKQKIAANWVMGEFSGALNKAGLELTDSPVSAEQLGGMIA RIVDNTISGKIAKQVFGFMWESEGKSADDIIAEKGLKQETDTGAIEAIIKEVLAANEKMMVEEYKSGKEKAFNGLVGQVMKASKGKANPAQVNMELMKKLIG | 0.4831422 | 0.000167798 | down |
| N9KZS5 | Acetyl-CoA C-acetyltransferase                             | 83 | 21 | 102 | 1  | 40.8 | MTDIVIVNGARTAMGGFQGSLSGLTAPELGAVTIKEAIARAGLQPTDVEEVIMGCVLPAGLKQG PARQAMRKAGLPDSTGAVTINKLCGSGMKAVMQAADMIKAGSAEIVVAGGMESMTNAPYVLP KARAGYRMGHGEIKDHMFDFGLEDAETGRMLMGSFAQDMANTRGYTREQMDFFAIRSLKRAQT AITEGYFKDEIVPVTVSTRKGDVIVDQDEQPLNAKIDKIPSLKPAFAKDGTTITANASSISDGASAL VLTSSVEAAQRGLQSLAKIIATASNSQHPSEFTIAPVGAIEKVLKKAGWNAQDVLWEINEAFAMVTMCPIDDFKLDPEKVNIIHGACALGHPVVGSTGSRILTLIHALKRTGGKKGVAAALCIGGGEATA                                                                                                   | 0.1744732 | 0.000724289 | down |
| Q0ZAZ7 | Outer membrane protein A                                   | 58 | 11 | 210 | 2  | 26.3 | TFQDSQHNNGGKDGNTLNSPELQDDLFVGAALGIELTPWLGFEAEYNQVKGDVDGASAGA EYK QKQINGNFYVTSDLITKNYDSKIKPYVLLGAGHYKYDFDGVNRGTRGTSEEGLGNAGVGAFW RLNDALSLRTEARATYNADEEFWNYTALAGLNVVLGGHLKPAAPVVEVAPVEPTPVAPQPQEL TEDLNMELRVFFDTNKSNIKDQYKPEIAKVAEKLSEYPNATARIEGHTDNTG                                                                                                                                                                                                                                                     | 2.2769934 | 3.87E-05    | up   |
| S3TFV1 | Glycosyltransferase                                        | 9  | 2  | 2   | 2  | 36.5 | MNIKPFSLCVVPAAYNEAENLKTFFIPALANSLKQQNLSYEIIVVDDGSKDDTIPILQTMIEDYPLVV LELSRNFGKEAALSAGLDHVTGEVALLIDADFQHPFEAIPMTINLWKNGYDMVYGIRNRTTESW LKRVLTKAYYRILNLSPPIDIPESAGDFRLLDARVVEAIKQLPEKNRYMKGLYAWVGFKSGIGNFS EQERQHGRSSFNLKSLFNLAMSGLTGFSDLPLRVCIYLGAILALGAMSYGVWIIKTLIEGISIPGW ATLAAGMTLLGGIQLLFIGILGEYIGRIYAEVKNRPKYIISTEHSRTKQEHSHAHQENTFSSF                                                                                                                                                              | 3.1230809 | 0.01314211  | up   |
| U5QB8  | ATPase                                                     | 63 | 14 | 30  | 14 | 29.1 | MKKIVITNEKGGIGKTSVAVHLAHYCYERGMRVLFVDMDKQGNISGFSLSKVAVEIKDTHSLFA DIQNFETLDKYFVLFKGNKSLKSLDFPTEQEFKLDKVEEYQRNFKSNIAKANEFDFICFDTPPTD GPFQRLPLLSEFALPFLLDKYSILGLRGIDTTQEIKEVNPKIQLGLLPNMVSANSVTQKTLN ELQKQLSHLMLDKTAFIPNRSADASEQQVPVWKIDKTSKDVGRKIKKINQLVLEKMGV                                                                                                                                                                                                                                             | 0.2671509 | 9.27E-06    | down |
| V5RC11 | Peptidyl-prolyl cis-trans isomerase                        | 74 | 11 | 66  | 1  | 26.0 | MSKALPIAVAVVLGGAALVPVYYATQHPTTEVGRKADKNASPIQKISYVLGYEVAQQTPPQLDT KAFVQGIHDARNKQPSAYTQEDLKAAVAAYEKELQKQMQHQDKPEQSGTATDSADAQFLAEN KTKAGVKTTASGLQYIITKEGTGKQPTAQSIKVHYEGRLINGQVFDSSYKRGQPVEFPLNQVIP GWTEGLQLMKKEGGKATFFIPSNLAYGPQELPGIPANSTLIFDELISVK                                                                                                                                                                                                                                                       | 2.6710075 | 0.001612486 | up   |
| V5RCJ8 | UTP--glucose-1-phosphate uridylyltransferase               | 24 | 7  | 23  | 1  | 31.9 | MIKKAILPVAGLGSRFLPASKSIPKEMVTVVDRPAIEYVVEHAIKAGIEQIILVTHSSKSSIENYFDR NFELETILEEKKKFDLLAEIRQIIPAYVSVSIRQPPLGLGHAVLCAKSVVGQDDFAVLLPDVLV KDNSSQNDLARMISRYNKNRAAQIMVESVPDHLVDQYGIVDVAKSPNIGESVAVQGIVEKPAVG TAPSNLSVVGRIYILPAKIMQLEKTPKGAGNEIQLTDAIALLQIETVEAYRMQGGQTFDCGSKLG YLKAVLHYGVEHPKLGNDFKQLIQELKL                                                                                                                                                                                                    | 0.2763977 | 0.000346486 | down |
| V5RCU9 | Glycosyltransferase                                        | 12 | 4  | 7   | 4  | 42.3 | MKILHAAYMKDASSGIVNQMYWEQEA AKELGISWKSILFVQNPNGFHNNEIVTVCNDIMGGEL KKWFKAKKSYYSWLEGMQYDVLIIRHSLCDPFEPFFIRKMIKPVYIMHHTFEIDELYSYNYGV KTKIKSLMEIYFGKKSISYSKGVAVTKEIFLYENSRVNGKFKKEIYVPNGHSQHDIIILDDRNDNIP EIVFIASYFNGWHGLDLLLLHNLSSINDDFILHIVGDVSVEDELLAKKDSRVILHGLHNLNIEISQLMS KMWIGLASFGLFRKGMKEACTLKVREYLYNGLPIYSGHKDIFPEEFYKFGPEKFDVILSFAHL MRKVSKSDVKQAAIKFIDKKILLKELYEQLLEEK                                                                                                                            | 4.9436775 | 8.60E-07    | up   |
| V5REA9 | DgaA                                                       | 34 | 9  | 37  | 9  | 35.8 | MKKFALIGAAGYIAPRHLKAIKETGNTLAVAMDVNDSVGIMDSHFPEAEFFTEFEFEFEAYVEDQ KLGKELDYVAICSPNYLHAPHMKYALKNGIDVICEKPLVNSEDLNMLAEYKQYGAKVNSIL QLRHLPSIHLRDKVQAAPADKVFVDVLTLYLTSRGKWYLKSWKGVDNKSGGVATNIGVHFYD MLHFIFGKIVKNEVHYRDEKTASGYLEYERARVRWFLSIDANNLPENAVQGEKLTYSRITIENEE LEFSGGFTDLHTQSYQRVLEGGYGVVEENRAAIETVEVIRVSPHIENPENPHLLAKVKKA                                                                                                                                                                            | 3.8906298 | 6.64E-06    | up   |
| V5REF7 | Wza                                                        | 42 | 13 | 40  | 1  | 40.5 | MKYCQFFSVLALSLSAASCVAVTSGLQTYDIPSEGVYKTDLGTTVNVVKISQETLPAIQPAQIDYQ RDYASLFKTKQSIYRLSPGDVLSIQLWAYPEITPPVNSISNEQSVQANGYPIDQTYIQFPLVGRY KAAGKTLAQVNRELHSQLARFLKNPDVVVRVVSYEGQRFVQGSVTKGGQFYLSDQPVSIYTA LGMAGGVTTTGDNTYIQLIRNGRTYNLNTIDLEKAGYSLHKLIVQPNNTIYVSTRENQKIYVMG ESGKNQALPMRDQGMTLTDALGESLGINPLSGSASRIYVVRTNPNDRTTIEYHLNLSIGDFGLA NQFRLRSNDVVYVDATGLTRWQRIVNQIIPFSNALYNIDRLGQ                                                                                                                        | 7.8474743 | 0.033811446 | up   |
| V5VBV2 | Type II toxin-antitoxin system HicA family toxin           | 51 | 2  | 9   | 2  | 7.5  | MKKVVKAKNLIAFRIWLEKLGYSVKNLADGKGFTFSFKKEYGLVTCDLAGNALAMQLGEEFED HLKA                                                                                                                                                                                                                                                                                                                                                                                                                                     | 2.6198339 | 0.011942211 | up   |

|        |                                     |    |    |    |    |      |                                                                                                                                                                                                                                                                                                                                                                                          |           |             |      |
|--------|-------------------------------------|----|----|----|----|------|------------------------------------------------------------------------------------------------------------------------------------------------------------------------------------------------------------------------------------------------------------------------------------------------------------------------------------------------------------------------------------------|-----------|-------------|------|
| X2FEM8 | Aminotransferase DegT               | 50 | 13 | 55 | 13 | 39.3 | MIDFIDLKAQQNRIKDKIDAGIQNVLTHGQYILGPEVIELEEKLASVVGAKHCITCANGTDALQIA<br>QMAFGIGPDDEVITPGFTYIATAETVALLGAKPVYVDVNPKTYNLDVEKLEAAITPRTKAIPVSL<br>YGCADFDAINAIKKYSIPVIEDAAQSFQATYKGRKSCNLSTVACTSFFPSKPLGCYGDGGAIFT<br>NDDELAKVIRQIARHGQDKRYHHIRVGVNSRLDTLQAAILLPKLEILDDEMQRQRVAEVYNRL<br>FDEVGIIHTTPYIEAHNTSAWAQYTIQVDNRAEVQEKLKAQGIPTAVHYPIPLNKQPAVADSDIHL<br>PIGDAIAEKVMSLPMHPYLAIDDQLKIVKAFG | 4.8302018 | 0.000102458 | up   |
| X2FEM9 | Glycosyl transferase                | 40 | 8  | 14 | 8  | 39.0 | MKILFLINSLKSKSGSERVAVELANKMAAIGSYNITLLNRESIKENAAYSADNVEVIALSGSLFEF<br>YKLLKQISSNNYDVVVVHNMGKLSLLCAFVNPNIKLVVLEHVSFISRPKIKIQLSKFLYRNIDQ<br>VVTLTQNDKEQFDKFHNSVIVIPNFSFASQPRNNNKQIVTIGRLTDQKNYIHLQAWKKIYQS<br>IPDWQLNIYGEQEELQDYIKQQLKKNVSLKGSTSNVKEVYEQSSFFVMSSKYEGLPMVLIEA<br>QSFGLPVSYNCPYGPSDVIRDSKNGFLVEDQNVDELAAAVLKVALSPQLLEQFSQSSLLNAKKY<br>QPEQLKIWIEKVLEG                        | 4.3031901 | 2.88E-05    | up   |
| X2FIS4 | Uncharacterized protein             | 59 | 6  | 17 | 6  | 14.2 | MVDETRYIPVKVLRQGNIIYLNCEAFDIVEKSSNLLHCIEQMKNRIIEKVVALHHAGEKLPVFDL<br>YKSLKSGGILLEIPSSCFDDTLERVTLTLPKSVITGIDAVSPNRSKFTQLAKEFIDGDNK                                                                                                                                                                                                                                                        | 0.1910772 | 3.30E-05    | down |
| X2FIW9 | Peptidyl-prolyl cis-trans isomerase | 81 | 12 | 76 | 1  | 26.4 | MEPFMSKALPIAVAVVLGGAALVPVYYATQHPTTEVGRKADKNASPIQKISYVLGYEVAQQTTP<br>ELDTKAFVQGIHDARNKQPSAYTQEDLKAAVAAYEKELQKMQHQDKPEAGTAADSADTQF<br>LAENKTKAGVKT TASGLQYIITKEGTGKQPTAQSIKVVHYEGRLINGQVFDSSYKRGQPVEFPLN<br>QVIPGWTEGLQLMKEGGKATFFIPSNLAYGPQELPGIPANSTLIFDVELISVK                                                                                                                          | 4.1687775 | 0.000859112 | up   |

**Table S5: Clustering analysis of DEPs across *A. baumannii* resistance phenotypes.**

| Cluster | Number of Proteins | Members of Proteins                                                                                                                                                                                                                                                                                                                                                                                                                                                                                                                                                                                                                                                                                                                                                                                                                                |
|---------|--------------------|----------------------------------------------------------------------------------------------------------------------------------------------------------------------------------------------------------------------------------------------------------------------------------------------------------------------------------------------------------------------------------------------------------------------------------------------------------------------------------------------------------------------------------------------------------------------------------------------------------------------------------------------------------------------------------------------------------------------------------------------------------------------------------------------------------------------------------------------------|
| 1       | 73                 | A0A0D8EQN4; A0A6H3EK80; A0A9P3CXM7; A0A9Q1NNH7; A0A8E4GYA6; A0A7U4BKB8; A0A009GY40; A0A5K6CRD2; A0A7U5XU67; X2FEM8; A0A411MUY4; A0A6B2QRH5; A0A9P2UFA0; A0A9P2XHD2; V5REF7; A0A517D2C4; A0A429MK36; A0A0Q1HCL9; A0A126W935; A0A9P2UEN7; A0A009QD14; A0A2U8NGD1; A0A009PWD1; A0A654KWM6; A0A009GKU9; D0C6V6; A0A0E1PV91; A0A4P8VDY7; V5REA9; G1CBP8; A0A158LX87; A0A062IH60; A0A097I5H7; A0A4Q4H670; X2FEM9; A0A9P2UFT2; A0A062IMZ0; A0A9Q1N7W9; A0A7U4BNK2; A0A9Q7ZZR4; V5VBV2; A0A9Q2E0D7; A0A7S8WB40; A0A062IHP7; A0A9Q4XE51; A0A385EQQ7; A0A9Q1S0P9; A0A9P3CXB6; A0A646MCI5; A0A7U4DEJ2; A0A009GAT0; A0A9P2XK89; C7FEK7; A0A385ET64; V5RCU9; A0A9Q8MVK5; A0A385F1H2; B0V8Q7; A0A062IBU4; A0A6H3TEL8; B0VNR0; A0A009S9H1; A0A6F8TGE6; S3TFV1; X2F9Q9; A0A9P2QE53; B0VQQ0; A0A828SQM8; A0A6H3T2F1; A0A0E1FIC9; A0A0E1PSU4; A0A090B7C1; A0A7Z2CM08 |
| 2       | 25                 | A0A7L9DVL0; A0A241ZEM6; A0A1S2G0B0; U5QBG8; A0A1E3M437; A0A076G2Y6; A0A7L9DUK6; A0A7M3FN66; X2FIS4; A0A9P2X8Z1; A0A009QHT0; A0A7U5XUN1; A0A0E3KX17; A0A7S8ZW13; A0A385F163; A0A410J6J6; A0A7Z1WQ98; A0A076G2N9; A0A9P2U9F4; B0VR23; A0A0J1ACY0; A0A076G3Q9; A0A7M3FNP5; A0A7U5XUJ7; A0A9Q7GEX3                                                                                                                                                                                                                                                                                                                                                                                                                                                                                                                                                     |
| 3       | 68                 | A0A411VGD7; A0A5P6FNN8; A0A062IRH0; N9JQN7; A0A1S2GAH7; A0A062IH37; A0A9Q1RZT3; A0A9P2QG90; N9KZS5; A0A241ZJ54; A0A9Q1S3Z9; A0A1E3M652; A0A009G8E9; A0A0H4UME6; A0A5K1MJ17; A0A6H3T3L2; A0A1E3MBC2; A0A062IS18; A0A6H3SV37; A0A385EU35; A0A7S8F867; A0A7Z1WNT5; A0A6B9KZP3; A0A0G4QU89; A0A009G8K1; A0A429LHC2; A0A9Q4SJB7; B0VRV5; A0A1E3MB56; A0A3F3MQT9; A0A829RFQ7; A0A1E3MBE0; A0A009HXJ2; A0A062IDU6; A0A6B9KPL0; A0A241ZE65; A0A9P2XJZ6; A0A009G507; A0A5P1UJC1; A0A9Q4SK06; V5RCJ8; A0A6F8TC76; N9JQM5; A0A6H2UPY5; A0A9Q1N8I6; A0A4Q4H7V6; A0A0J1DET4; A0A5K1MJT9; A0A654L9F1; A0A009H3M3; A0A8B4MT53; A0A7X5C6N3; A0A3S0N6T4; A0A009T164; A0A6B9KQE9; A0A6H3UE57; A0A1T0DRB8; A0A9P2UCI4; A0A7S8ZW19; A0A654L2Q2; A0A9P2P5S8; A0A654L2G6; A0A009PBA1; A0A481WVU6; A0A062I638; A0A5P3MF62; S3TD50; A0A829RK63                             |
| 4       | 38                 | A0A829K710; A0A0E1PNX1; A0A380V1V9; A0A8I0F482; A0A1S2FL61; A0A4V5MUT8; A0A654KV19; A0A0F6SYM7; A0A009GVM1; A0A2I8CT67; X2FIW9; A0A654L3J1; A0A009QKJ4; A0A090BAM3; V5RC11; Q0ZAQ7; A0A481WW07; A0A6H3T9J1; A0A5K1MH16; A0A0E1PVE2; A0A7U7KGU4; D0CDQ9; A0A836M1S1; A0A7U3Y2S3; A0A0E1PN17; A0A0D5YE03; A0A0E1PVE6; A0A1S8V5S4; A0A9P2UGQ7; A0A059ZG34; A0A9Q1RYZ7; A0A009GU27; A0A9Q1NIM9; A0A836YML5; A0A0E1PVF3; A0A9Q1ZY45; A0A1B1LW15; A0A9Q2I4G4                                                                                                                                                                                                                                                                                                                                                                                             |
| 5       | 17                 | A0A9Q6DAC3; A0A6I4HS79; A0A3S0KUX5; A0A0E1PQH3; A0A2U9QFX2; Q4A208; A0A0E1PP65; A0A097I5C2; A0A7U3Y047; A0A0E1FL10; N0A436; A0A9P2P3T1; A0A4Q4GN90; A0A9Q4SH60; A0A6I4HT95; A0A829K6I4; A0A837Q8N8                                                                                                                                                                                                                                                                                                                                                                                                                                                                                                                                                                                                                                                 |
| 6       | 39                 | A0A5N0FZ32; A0A9P2XJK2; H6VX66; A0A9Q7DS60; A0A9Q1W4V0; A0A6F8TCX5; A0A1E3M2G1; A0A125S0J9; A0A335J3M4; A0A0E1PTG5; A0A9Q1NA93; A0A9P2UE60; A0A385EUT6; A0A505ZPT1; B0VNB8; H6UQA3; A0A6H3T0T0; A0A385EUA0; A0A9Q6DWC7; A0A7U4F8B0; A0A090B850; A0A158LWX7; A0A6H3SGL6; A0A009HBN0; A0A828STC4; A0A5P1UPF1; A0A7U4BQ44; A0A7Z1WKR3; A0A505MKS4; A0A9P3CY71; A0A385ER43; A0A333V6L2; A0A3R9RP79; A0A9Q7I520; A0A1E3M9X9; A0A9Q1RV14; A0A385F0B4; A0A836LYR7; A0A829KCA3                                                                                                                                                                                                                                                                                                                                                                             |

Table S6: DEMs in MDR vs. DS strains.

| Compound ID   | Name                                                          | Formula           | Molecular Weight | RT [min] | m/z       | mzCloud Results | mzVault Results | MassList Results | KEGG ID    | ClassyFire functional classification    | FC MDR/DS  | P-value MDR/DS | VIP      | Regulate |
|---------------|---------------------------------------------------------------|-------------------|------------------|----------|-----------|-----------------|-----------------|------------------|------------|-----------------------------------------|------------|----------------|----------|----------|
| Com_1000_neg  | N-Acetylaspartic acid                                         | C6 H9 N O5        | 175.04762        | 1.869    | 174.04035 | Full match      | Full match      | Full match       | cpd:C01042 | Organic acids and derivatives           | 2.7017374  | 0.00018019     | 1.2633   | up       |
| Com_10085_pos | Metyrosine                                                    | C10 H13 N O3      | 195.08933        | 1.195    | 196.0966  | No results      | No results      | Full match       | cpd:C07921 | --                                      | 0.18102589 | 0.04209877     | 1.181034 | down     |
| Com_1027_pos  | N-(2-hydroxyphenyl)acetamide                                  | C8 H9 N O2        | 173.04354        | 1.464    | 174.05084 | Invalid mass    | No results      | No results       | --         | --                                      | 4.07040747 | 0.00145322     | 1.574182 | up       |
| Com_1037_neg  | Guanosine                                                     | C10 H13 N5 O5     | 283.09192        | 3.682    | 282.08463 | Full match      | Full match      | Full match       | cpd:C00387 | Nucleosides, nucleotides, and analogues | 6.44587455 | 5.0929E-05     | 1.259118 | up       |
| Com_1037_pos  | 1,5-dimethyl-N-(4-morpholinobenzyl)-1H-pyrazole-3-carboxamide | C17 H22 N4 O2     | 628.34787        | 4.985    | 315.18121 | Invalid mass    | No results      | No results       | --         | --                                      | 0.436118   | 8.8642E-06     | 1.002827 | down     |
| Com_10469_neg | N-Acetyl-L-phenylalanine                                      | C11 H13 N O3      | 225.09982        | 5.571    | 224.0927  | Invalid mass    | Invalid mass    | No results       | cpd:C03519 | Organic acids and derivatives           | 2.70719891 | 0.00087648     | 1.737554 | up       |
| Com_10641_pos | P-Aminohippuric Acid                                          | C9 H10 N2 O3      | 194.06887        | 4.966    | 406.17123 | No results      | No results      | Full match       | cpd:D06890 | Benzenoids                              | 4.91621845 | 4.9284E-06     | 1.687851 | up       |
| Com_1082_pos  | L-cysteine                                                    | C3 H7 N O2 S      | 121.01977        | 1.32     | 122.02705 | No results      | No results      | Full match       | cpd:C00097 | Organic acids and derivatives           | 0.4626108  | 0.01269198     | 1.171775 | down     |
| Com_10905_pos | Tauroursodeoxycholic acid                                     | C26 H45 N O6 S    | 499.29842        | 5.324    | 500.30569 | No results      | No results      | Full match       | cpd:C16868 | Lipids and lipid-like molecules         | 0.49242589 | 0.00099953     | 1.057743 | down     |
| Com_10929_neg | L-Cysteinesulfinic acid                                       | C3 H7 N O4 S      | 153.00903        | 1.361    | 152.00175 | No results      | No results      | Full match       | cpd:C00606 | Organic acids and derivatives           | 4.75999502 | 3.5127E-05     | 1.791118 | up       |
| Com_11_pos    | LPE 18:1                                                      | C23 H46 N O7 P    | 479.30051        | 9.346    | 480.30781 | No results      | Full match      | Full match       | --         | Lipids and lipid-like molecules         | 0.08117273 | 0.00810178     | 1.105241 | down     |
| Com_11030_pos | Methyl EudesMate                                              | C11 H14 O5        | 226.08386        | 4.997    | 227.09114 | No results      | No results      | Full match       | --         | Benzenoids                              | 3.08879099 | 0.00165568     | 1.521316 | up       |
| Com_1134_neg  | N-Acetyl-DL-tryptophan                                        | C13 H14 N2 O3     | 246.10066        | 5.521    | 245.0932  | Full match      | Full match      | Full match       | --         | Organic acids and derivatives           | 2.42119703 | 0.00012065     | 1.454222 | up       |
| Com_1141_pos  | DL-Lysine                                                     | C6 H14 N2 O2      | 146.10533        | 1.14     | 147.11256 | Full match      | Full match      | Full match       | cpd:C16440 | Organic acids and derivatives           | 0.07874939 | 0.00069914     | 1.708858 | down     |
| Com_1151_pos  | Oleoyl ethanolamide                                           | C20 H39 N O2      | 307.28682        | 9.347    | 308.2941  | Invalid mass    | No results      | No results       | cpd:C20792 | Organic nitrogen compounds              | 0.0712691  | 0.01313724     | 1.373087 | down     |
| Com_1177_pos  | Guanine                                                       | C5 H5 N5 O        | 151.04927        | 1.617    | 152.05655 | No results      | No results      | Full match       | cpd:C00242 | Organoheterocyclic compounds            | 0.2918236  | 5.5225E-05     | 1.545317 | down     |
| Com_119_neg   | 2-Hydroxyvaleric acid                                         | C5 H10 O3         | 118.0622         | 5.255    | 117.05492 | Invalid mass    | Invalid mass    | No results       | --         | Lipids and lipid-like molecules         | 59.4231004 | 5.2389E-14     | 1.818733 | up       |
| Com_1217_neg  | Pantothenic acid                                              | C9 H17 N O5       | 219.1106         | 5.015    | 218.10331 | Full match      | Full match      | Full match       | cpd:C00864 | Organic oxygen compounds                | 2.46400285 | 1.0196E-06     | 1.847551 | up       |
| Com_12308_neg | IDP                                                           | C10 H14 N4 O11 P2 | 428.01449        | 3.688    | 427.00721 | No results      | No results      | Full match       | cpd:C00104 | Nucleosides, nucleotides, and analogues | 9.67838626 | 0.00084531     | 1.686685 | up       |
| Com_1245_pos  | Acetylcysteine                                                | C5 H9 N O3 S      | 163.02992        | 1.5      | 146.02663 | No results      | No results      | Full match       | cpd:C06809 | Organic acids and derivatives           | 7.0552721  | 1.3004E-06     | 1.817203 | up       |
| Com_1258_pos  | Phe-Pro                                                       | C14 H18 N2 O3     | 262.13112        | 5.648    | 263.1384  | No results      | No results      | Full match       | --         | Organic acids and derivatives           | 0.28558596 | 6.282E-06      | 1.268481 | down     |
| Com_1286_neg  | Uridine 5'-diphosphate                                        | C9 H14 N2 O12 P2  | 404.00291        | 1.337    | 402.99564 | Full match      | No results      | Full match       | cpd:C00015 | Nucleosides, nucleotides, and analogues | 0.31529829 | 0.00621701     | 1.558024 | down     |
| Com_1296_neg  | Hippuric acid                                                 | C9 H9 N O3        | 179.05789        | 5.927    | 178.05059 | No results      | No results      | Full match       | cpd:C01586 | Benzenoids                              | 2.61094054 | 5.8346E-05     | 1.61676  | up       |
| Com_13_neg    | 17-AAG                                                        | C31 H43 N3 O8     | 567.29161        | 5.562    | 566.28431 | Invalid mass    | No results      | No results       | --         | --                                      | 0.23759903 | 4.8774E-08     | 1.8416   | down     |
| Com_13022_neg | Biopterin                                                     | C9 H11 N5 O3      | 237.08502        | 1.431    | 236.07774 | No results      | No results      | Full match       | cpd:C06313 | Organoheterocyclic compounds            | 0.18477632 | 0.01614326     | 1.466351 | down     |
| Com_1334_neg  | 2'-Deoxyinosine                                               | C10 H12 N4 O4     | 252.08587        | 4.055    | 251.07859 | Full match      | Full match      | Full match       | cpd:C05512 | Nucleosides, nucleotides, and analogues | 3.84470071 | 0.00123083     | 1.732261 | up       |
| Com_1344_neg  | 4-Hydroxy-L-Glutamic                                          | C5 H9 N O5        | 163.04881        | 5.043    | 162.04153 | No results      | No results      | Full match       | cpd:C03079 | Organic acids and derivatives           | 2.36905799 | 6.1131E-06     | 1.554088 | up       |
| Com_13462_neg | dCMP                                                          | C9 H14 N3 O7 P    | 307.05824        | 3.686    | 306.05096 | No results      | No results      | Full match       | cpd:C00239 | Nucleosides, nucleotides, and analogues | 22.7799459 | 7.8799E-06     | 1.782052 | up       |
| Com_138_neg   | Fumaric acid                                                  | C4 H4 O4          | 116.01017        | 2.364    | 115.00288 | No results      | Invalid mass    | No results       | cpd:C00122 | Organic acids and derivatives           | 2.31385629 | 0.00122185     | 1.630001 | up       |
| Com_1409_pos  | DL-Arginine                                                   | C6 H14 N4 O2      | 174.11148        | 1.209    | 175.11874 | Full match      | Full match      | Full match       | cpd:C02385 | Organic acids and derivatives           | 0.18017219 | 0.01119575     | 1.374111 | down     |
| Com_1445_pos  | Guanosine monophosphate                                       | C10 H14 N5 O8 P   | 363.0575         | 1.591    | 364.06478 | No results      | No results      | Full match       | cpd:C00144 | Nucleosides, nucleotides, and analogues | 0.063104   | 2.4446E-06     | 1.781664 | down     |
| Com_1494_neg  | LPG 17:1                                                      | C23 H45 O9 P      | 496.28111        | 9.11     | 495.27383 | No results      | Full match      | No results       | --         | Lipids and lipid-like molecules         | 0.14616402 | 0.017246       | 1.413575 | down     |
| Com_153_pos   | Tyramine                                                      | C8 H11 N O        | 137.08408        | 5.404    | 120.08081 | No results      | No results      | Full match       | cpd:C00483 | Benzenoids                              | 0.2203383  | 6.3426E-05     | 1.643533 | down     |
| Com_155_neg   | Mycophenolic acid                                             | C17 H20 O6        | 320.12368        | 5.598    | 319.1164  | Invalid mass    | No results      | No results       | cpd:C20380 | Organoheterocyclic compounds            | 450.817901 | 2.3269E-11     | 1.771228 | up       |
| Com_1563_pos  | 2,6-Dihydroxypurine                                           | C5 H4 N4 O2       | 152.03335        | 4.751    | 153.04062 | No results      | No results      | Full match       | cpd:C00385 | Organoheterocyclic compounds            | 35.2401791 | 5.0142E-06     | 1.707512 | up       |
| Com_1574_pos  | LPE 14:0                                                      | C19 H40 N O7 P    | 425.25379        | 8.172    | 426.26104 | No results      | Full match      | Full match       | --         | Lipids and lipid-like molecules         | 4.2406332  | 9.8198E-07     | 1.32501  | up       |
| Com_159_pos   | N-Acetylmethionine                                            | C7 H13 N O3 S     | 191.06144        | 5.236    | 214.05068 | No results      | Full match      | Full match       | cpd:C02712 | Organic acids and derivatives           | 6.82676997 | 1.1343E-05     | 1.808867 | up       |
| Com_1591_neg  | Asp-glu                                                       | C9 H14 N2 O7      | 262.0793         | 5.165    | 261.07202 | No results      | No results      | Full match       | --         | Organic acids and derivatives           | 0.12298857 | 1.4826E-05     | 1.908689 | down     |
| Com_1592_neg  | LPG 16:0                                                      | C22 H45 O9 P      | 484.28041        | 9.397    | 483.27313 | No results      | Full match      | No results       | --         | Lipids and lipid-like molecules         | 0.08312874 | 0.03117309     | 1.24168  | down     |
| Com_16_neg    | N-Acetyl-L-methionine                                         | C7 H13 N O3 S     | 191.06125        | 5.238    | 190.05395 | Full match      | Full match      | Full match       | cpd:C02712 | Organic acids and derivatives           | 5.55333882 | 3.0887E-07     | 1.910275 | up       |
| Com_165_neg   | trans-Cinnamic acid                                           | C9 H8 O2          | 148.05177        | 5.603    | 147.0445  | Full match      | Full match      | No results       | cpd:C00423 | Phenylpropanoids and polyketides        | 13.0982605 | 1.215E-07      | 1.67998  | up       |
| Com_1697_neg  | 2-Methylbutyroylcarnitine                                     | C12 H23 N O4      | 245.16283        | 6.152    | 244.15556 | No results      | No results      | Full match       | --         | Lipids and lipid-like molecules         | 12.9264666 | 1.5832E-07     | 1.513087 | up       |
| Com_1700_neg  | N-Acetylvaline                                                | C7 H13 N O3       | 159.08905        | 5.278    | 158.08177 | No results      | No results      | Full match       | --         | Organic acids and derivatives           | 5.88824584 | 6.9596E-14     | 1.917242 | up       |

|              |                                                                        |                     |           |       |           |              |              |            |            |                                         |            |            |          |      |
|--------------|------------------------------------------------------------------------|---------------------|-----------|-------|-----------|--------------|--------------|------------|------------|-----------------------------------------|------------|------------|----------|------|
| Com_1708_neg | Guanosine monophosphate (GMP)                                          | C10 H14 N5 O8 P     | 363.05875 | 1.52  | 362.05148 | Full match   | Full match   | Full match | cpd:C00144 | Nucleosides, nucleotides, and analogues | 0.11335922 | 1.8736E-05 | 1.678151 | down |
| Com_1720_pos | PC O-18:1                                                              | C26 H52 N O7 P      | 521.34787 | 9.431 | 522.35513 | No results   | Full match   | Full match | --         | --                                      | 0.09274921 | 0.00151917 | 1.469708 | down |
| Com_1750_pos | 5,7-dimethyl-2-phenylpyrazolo[1,5-a]pyrimidine                         | C14 H13 N3          | 245.09008 | 6.256 | 246.09718 | Invalid mass | No results   | No results | --         | --                                      | 25.3971857 | 3.3792E-06 | 1.936016 | up   |
| Com_1787_pos | Enrofloxacin                                                           | C19 H22 F N3 O3     | 381.14639 | 6.255 | 382.1537  | Invalid mass | No results   | No results | --         | Organoheterocyclic compounds            | 7.27574889 | 5.969E-13  | 1.018002 | up   |
| Com_1796_pos | LPE 17:1                                                               | C22 H44 N O7 P      | 465.28514 | 8.991 | 466.29242 | No results   | Full match   | No results | --         | Lipids and lipid-like molecules         | 4.74967273 | 0.00431946 | 1.476093 | up   |
| Com_1803_pos | 1-allyl-4,5-diphenyl-2-(2-thienyl)-1H-imidazole                        | C22 H18 N2 S        | 342.12208 | 5.4   | 343.12936 | Invalid mass | No results   | No results | --         | --                                      | 11.8510005 | 4.9173E-07 | 1.899645 | up   |
| Com_181_neg  | Sucrose                                                                | C12 H22 O11         | 342.11685 | 1.356 | 387.11507 | Full match   | Full match   | Full match | cpd:C00089 | Organic oxygen compounds                | 0.32614841 | 0.03473197 | 1.073141 | down |
| Com_1811_neg | Uric acid                                                              | C5 H4 N4 O3         | 168.02788 | 1.825 | 167.0206  | Full match   | Full match   | Full match | cpd:C00366 | Organoheterocyclic compounds            | 0.17440441 | 0.00039684 | 1.642116 | down |
| Com_1818_pos | (4-amino-1,2,5-oxadiazol-3-yl)(morpholino)methanone                    | C7 H11 N5 O3        | 213.08601 | 1.264 | 214.09329 | Full match   | No results   | No results | --         | --                                      | 2.28565989 | 3.0512E-06 | 1.259566 | up   |
| Com_1832_pos | PC O-16:0                                                              | C24 H50 N O7 P      | 495.3319  | 9.187 | 496.33916 | No results   | Full match   | Full match | --         | --                                      | 0.13267224 | 0.00056886 | 1.330491 | down |
| Com_184_pos  | Methyl indole-3-acetate                                                | C11 H11 N O2        | 189.07869 | 5.131 | 190.08596 | Full match   | Full match   | Full match | cpd:C20635 | Organoheterocyclic compounds            | 2.04736569 | 0.00013273 | 1.312348 | up   |
| Com_188_neg  | N-Acetyl-D-tryptophan                                                  | C13 H14 N2 O3       | 246.10091 | 5.128 | 291.09912 | No results   | No results   | Full match | cpd:C03137 | Organic acids and derivatives           | 0.20305848 | 1.6078E-07 | 1.894656 | down |
| Com_19_neg   | LPG 18:1                                                               | C24 H47 O9 P        | 510.29631 | 9.734 | 509.28903 | No results   | Full match   | Full match | --         | Lipids and lipid-like molecules         | 0.04822284 | 0.02529343 | 1.138425 | down |
| Com_1952_pos | 5-Methoxyindole-3-Carbaldehyde                                         | C10 H9 N O2         | 175.06321 | 4.769 | 176.07048 | No results   | No results   | Full match | --         | Organoheterocyclic compounds            | 2.28487838 | 6.2138E-06 | 1.328402 | up   |
| Com_2088_pos | Cytidine 5'-monophosphate (hydrate)                                    | C9 H14 N3 O8 P      | 323.0515  | 1.399 | 324.05877 | Full match   | Full match   | Full match | cpd:C00055 | Nucleosides, nucleotides, and analogues | 0.06488796 | 0.00176449 | 1.494039 | down |
| Com_21_neg   | Coenzyme A                                                             | C21 H36 N7 O16 P3 S | 767.11602 | 4.946 | 382.55068 | Full match   | Full match   | No results | cpd:C00010 | Nucleosides, nucleotides, and analogues | 0.30156334 | 1.3646E-05 | 1.734433 | down |
| Com_210_pos  | Methyl nicotinate                                                      | C7 H7 N O2          | 137.04763 | 5.474 | 138.0549  | No results   | No results   | Full match | --         | Organoheterocyclic compounds            | 2.99965419 | 0.00022749 | 1.784024 | up   |
| Com_212_neg  | Phenylacetaldehyde                                                     | C8 H8 O             | 120.0569  | 5.602 | 119.04941 | Invalid mass | No results   | No results | cpd:C00601 | Benzenoids                              | 10.6847439 | 4.1223E-09 | 1.699575 | up   |
| Com_2126_neg | Lysope 18:1                                                            | C23 H46 N O7 P      | 479.30205 | 9.754 | 478.29477 | No results   | No results   | Full match | --         | Lipids and lipid-like molecules         | 0.13105801 | 0.03173843 | 1.112639 | down |
| Com_2184_pos | Epigallocatechin                                                       | C15 H14 O7          | 612.15163 | 2.382 | 307.08309 | No results   | Invalid mass | No match   | cpd:C12136 | Phenylpropanoids and polyketides        | 5.75723435 | 0.00335584 | 1.661577 | up   |
| Com_221_neg  | 2-{1-[2-(1-benzothiophen-5-ylamino)-2-oxoethyl]cyclohexyl}acetic acid  | C18 H21 N O3 S      | 331.12057 | 5.178 | 330.11329 | Invalid mass | No results   | No results | --         | --                                      | 0.12191098 | 9.7274E-07 | 1.880874 | down |
| Com_2224_pos | Gibberellic acid ethyl 2-amino-8H-indeno[2,1-b]thiophene-3-carboxylate | C19 H22 O6          | 368.11908 | 5.131 | 369.12672 | Invalid mass | No results   | No results | cpd:C01699 | Lipids and lipid-like molecules         | 0.49824426 | 0.00014477 | 1.520144 | down |
| Com_2240_pos | 4-(3,4-dihydro-2H-1,5-benzodioxepin-7-ylamino)-4-oxobutanoic acid      | C14 H13 N O2 S      | 259.06645 | 5.212 | 260.07373 | Full match   | No results   | No results | --         | --                                      | 12.3077715 | 4.9784E-06 | 1.810583 | up   |
| Com_2394_pos | 1-Methyluric acid                                                      | C6 H6 N4 O3         | 182.04373 | 1.467 | 181.03645 | No results   | No results   | Full match | cpd:C16359 | Organoheterocyclic compounds            | 3.19645062 | 0.00548268 | 1.154972 | up   |
| Com_2453_pos | 6-(7-methyloctyl)-1H,3H,4H,6H-furo[3,4-c]furan-1-one                   | C15 H24 O3          | 252.17016 | 6.76  | 253.17742 | Invalid mass | No results   | No results | --         | --                                      | 3.31145874 | 0.00121949 | 1.575497 | up   |
| Com_2481_neg | L-Homocystine                                                          | C8 H16 N2 O4 S2     | 268.05382 | 5.638 | 267.04655 | No results   | No results   | Full match | cpd:C01817 | Organic acids and derivatives           | 11.1293548 | 8.0738E-08 | 1.849811 | up   |
| Com_252_pos  | Paracetamol                                                            | C8 H9 N O2          | 151.06322 | 4.719 | 152.07049 | Full match   | Full match   | Full match | cpd:C06804 | Benzenoids                              | 0.11147751 | 0.00514082 | 1.573577 | down |
| Com_2549_neg | 12-Hydroxydodecanoic (1R,2R)-trans-N-Boc-1,2-cyclohexanediamine        | C12 H24 O3          | 216.17248 | 6.457 | 215.16521 | Full match   | No results   | No results | cpd:C08317 | Organic acids and derivatives           | 2.79625425 | 0.00020998 | 1.694439 | up   |
| Com_2559_pos | LPC 18:1                                                               | C26 H52 N O7 P      | 567.35479 | 9.42  | 566.34751 | No results   | Invalid mass | No results | cpd:C04230 | Lipids and lipid-like molecules         | 0.10118219 | 0.00053312 | 1.300642 | down |
| Com_2639_neg | Butyryl-coenzyme A                                                     | C25 H42 N7 O17 P3 S | 838.15329 | 4.689 | 418.06928 | Invalid mass | No results   | No results | cpd:C00136 | Lipids and lipid-like molecules         | 7.6738276  | 0.01619724 | 1.40187  | up   |

|              |                                                          |                     |           |       |           |              |              |            |            |                                         |            |            |          |      |
|--------------|----------------------------------------------------------|---------------------|-----------|-------|-----------|--------------|--------------|------------|------------|-----------------------------------------|------------|------------|----------|------|
| Com_2642_neg | Guanosine 5'-diphosphate                                 | C10 H15 N5 O11 P2   | 443.0253  | 1.479 | 442.01803 | Full match   | No results   | Full match | cpd:C00035 | Nucleosides, nucleotides, and analogues | 0.06272352 | 2.8601E-06 | 1.6703   | down |
| Com_2708_neg | LPG 18:2                                                 | C24 H45 O9 P        | 508.28087 | 8.966 | 507.2736  | No results   | Full match   | No results | --         | Lipids and lipid-like molecules         | 0.11545642 | 0.02059332 | 1.303228 | down |
| Com_2737_neg | LPG 16:0                                                 | C24 H50 N O7 P      | 541.33908 | 9.193 | 540.3318  | No results   | Invalid mass | No results | cpd:C04230 | Lipids and lipid-like molecules         | 0.11370581 | 0.00020927 | 1.219122 | down |
| Com_281_neg  | Xanthosine                                               | C10 H12 N4 O6       | 284.07586 | 4.751 | 283.06859 | Full match   | Full match   | Full match | cpd:C01762 | Nucleosides, nucleotides, and analogues | 61.1629439 | 1.8933E-06 | 1.821532 | up   |
| Com_2821_pos | N-(4-fluorophenyl)-N'-(2-piperidinophenyl)urea           | C18 H20 F N3 O      | 335.14538 | 5.329 | 336.15266 | Invalid mass | No results   | No results | --         | --                                      | 0.23466633 | 6.5505E-05 | 1.505748 | down |
| Com_284_neg  | 2-Hydroxy-4-methylthiobutanoic acid                      | C5 H10 O3 S         | 150.03448 | 5.202 | 149.02721 | Full match   | No results   | No results | --         | Lipids and lipid-like molecules         | 148.634395 | 1.3265E-11 | 1.722851 | up   |
| Com_285_pos  | 2-Phenylglycine                                          | C8 H9 N O2          | 151.06321 | 5.523 | 152.07048 | No results   | No results   | Full match | --         | Organic acids and derivatives           | 0.25631741 | 0.01278733 | 1.453605 | down |
| Com_29_neg   | 3'-Dephosphocoenzyme A                                   | C21 H35 N7 O13 P2 S | 687.15058 | 4.887 | 686.14331 | Full match   | No results   | Full match | cpd:C00882 | Nucleosides, nucleotides, and analogues | 0.49193307 | 0.00237658 | 1.37989  | down |
| Com_292_pos  | Proline-hydroxyproline                                   | C10 H16 N2 O4       | 228.1108  | 5.163 | 229.11808 | No results   | Full match   | No results | --         | Organic acids and derivatives           | 0.1831852  | 0.00012738 | 1.848648 | down |
| Com_299_neg  | Pimelic acid                                             | C7 H12 O4           | 160.07301 | 5.387 | 159.06574 | Full match   | Full match   | Full match | cpd:C02656 | Lipids and lipid-like molecules         | 2.31008623 | 0.01210935 | 1.233683 | up   |
| Com_3_neg    | 2-Hydroxycaproic acid                                    | C6 H12 O3           | 132.07784 | 5.592 | 131.07055 | Invalid mass | Invalid mass | No results | --         | Lipids and lipid-like molecules         | 67.4388415 | 3.4226E-13 | 1.797508 | up   |
| Com_3056_pos | Virginiamycin                                            | C28 H35 N3 O7       | 507.23154 | 5.143 | 508.23882 | Invalid mass | No results   | No results | cpd:C11299 | Phenylpropanoids and polyketides        | 3.38351195 | 0.00038066 | 1.600258 | up   |
| Com_3169_neg | 6-Hydroxymelatonin                                       | C13 H16 N2 O3       | 248.11623 | 5.142 | 247.10896 | No results   | No results   | Full match | cpd:C05643 | Organoheterocyclic compounds            | 0.25359591 | 0.00027213 | 1.761626 | down |
| Com_3179_pos | 6,6-dimethyl-4-piperidino-5,6-dihydro-2H-thiine-2-thione | C12 H19 N S2        | 241.09256 | 5.009 | 242.09984 | Invalid mass | No results   | No results | --         | --                                      | 3.44595298 | 5.9629E-05 | 1.785211 | up   |
| Com_318_neg  | Boc-beta-cyano-L-alanine                                 | C9 H14 N2 O4        | 214.0957  | 5.327 | 427.18413 | No results   | No results   | Full match | --         | Organic acids and derivatives           | 0.35411934 | 5.3054E-07 | 1.597375 | down |
| Com_3191_neg | Cytosine                                                 | C4 H5 N3 O          | 111.04274 | 1.456 | 156.04096 | No results   | No results   | Full match | cpd:C00380 | Organoheterocyclic compounds            | 4.42732083 | 5.2964E-06 | 1.613634 | up   |
| Com_3280_pos | N(6)-OH-Me-Adenosine                                     | C11 H15 N5 O5       | 297.1071  | 3.954 | 298.11438 | Full match   | No results   | Full match | --         | Nucleosides, nucleotides, and analogues | 0.34871036 | 0.00063443 | 1.022112 | down |
| Com_3305_pos | Uridine 5'-monophosphate                                 | C9 H13 N2 O9 P      | 324.03542 | 1.422 | 325.04267 | No results   | Full match   | Full match | cpd:C00105 | Nucleosides, nucleotides, and analogues | 0.10429492 | 0.00063381 | 1.634257 | down |
| Com_333_pos  | Inosine                                                  | C10 H12 N4 O5       | 268.08053 | 3.68  | 269.08784 | Full match   | Full match   | Full match | cpd:C00294 | Nucleosides, nucleotides, and analogues | 22.8915382 | 5.5327E-08 | 1.205227 | up   |
| Com_3363_pos | L-Cysteine-glutathione gisulfide                         | C13 H22 N4 O8 S2    | 426.08761 | 1.381 | 214.05108 | No results   | No results   | Full match | --         | --                                      | 6.02722299 | 4.2542E-05 | 1.795157 | up   |
| Com_3402_pos | 1-(3-phenylpropanoyl)-4-piperidinecarboxylic acid        | C15 H19 N O3        | 598.18792 | 4.756 | 300.10123 | Invalid mass | No results   | No results | --         | --                                      | 24.3484279 | 1.8548E-08 | 1.701832 | up   |
| Com_35_neg   | DL-4-Hydroxyphenyllactic acid                            | C9 H10 O4           | 182.05753 | 5.158 | 181.05026 | Full match   | No results   | Full match | --         | Phenylpropanoids and polyketides        | 3.24425158 | 7.2325E-06 | 1.285061 | up   |
| Com_357_neg  | Uridine monophosphate                                    | C9 H13 N2 O9 P      | 324.03636 | 1.457 | 323.02909 | Full match   | Full match   | Full match | cpd:C00105 | Nucleosides, nucleotides, and analogues | 0.13932465 | 0.00035854 | 1.692266 | down |
| Com_3591_neg | Prostaglandin G2                                         | C20 H32 O6          | 368.22014 | 5.853 | 367.21286 | No results   | No results   | Full match | cpd:C05956 | Lipids and lipid-like molecules         | 0.27979703 | 0.00650976 | 1.351326 | down |
| Com_3684_neg | Alloxan                                                  | C4 H4 N2 O5         | 160.01143 | 1.384 | 159.00422 | No results   | No results   | Full match | --         | Organoheterocyclic compounds            | 3.10826121 | 3.2913E-10 | 1.399929 | up   |
| Com_3902_pos | D-Fructose 6-phosphate                                   | C6 H13 O9 P         | 260.02863 | 5.491 | 261.03592 | No results   | No results   | Full match | cpd:C00085 | --                                      | 4.1700823  | 3.7979E-05 | 1.451929 | up   |
| Com_397_neg  | Syringic acid                                            | C9 H10 O5           | 198.05249 | 4.951 | 179.03464 | No results   | No results   | Full match | cpd:C10833 | Benzenoids                              | 0.40169896 | 0.002882   | 1.339661 | down |
| Com_4002_neg | LPG 14:0                                                 | C20 H41 O9 P        | 456.24958 | 8.211 | 455.2423  | No results   | Full match   | No results | --         | Lipids and lipid-like molecules         | 3.11762799 | 0.00426698 | 1.33373  | up   |
| Com_41_neg   | LPG 16:1                                                 | C22 H43 O9 P        | 482.26507 | 8.52  | 481.25779 | No results   | Full match   | No results | --         | Lipids and lipid-like molecules         | 0.34239171 | 0.00933248 | 1.440478 | down |
| Com_414_neg  | Glycerophospho-N-palmitoyl ethanolamine                  | C21 H44 N O7 P      | 453.28625 | 9.32  | 452.27897 | Full match   | Full match   | Full match | --         | Lipids and lipid-like molecules         | 0.21459094 | 0.02272326 | 1.171484 | down |
| Com_4157_pos | gamma-L-arginine                                         | C10 H18 N2 O5 S     | 278.09357 | 4.882 | 279.10085 | No results   | Full match   | No results | --         | Organic acids and derivatives           | 5.45763943 | 0.00071376 | 1.60797  | up   |
| Com_4234_neg | L-arginine                                               | C6 H14 N4 O2        | 174.11132 | 1.229 | 173.10403 | No results   | No results   | Full match | cpd:C00062 | Organic acids and derivatives           | 0.30012    | 0.0153999  | 1.293639 | down |
| Com_4270_pos | 8-Isoprostaglandin F1β                                   | C20 H36 O5          | 373.28242 | 6.501 | 374.2897  | Invalid mass | No results   | No results | --         | Lipids and lipid-like molecules         | 2.56979539 | 0.00436374 | 1.290135 | up   |
| Com_4355_pos | Deoxyadenosine                                           | C10 H13 N5 O3       | 251.10149 | 5.023 | 252.10866 | No results   | No results   | Full match | cpd:C00559 | Nucleosides, nucleotides, and analogues | 0.3240599  | 0.01188112 | 1.423333 | down |
| Com_4447_pos | 2-[4-(tert-butyl)-2-chlorophenoxy]-3-nitropyridine       | C15 H15 Cl N2 O3    | 306.08076 | 1.366 | 307.08804 | Invalid mass | No results   | No results | --         | --                                      | 5.32783158 | 4.1736E-06 | 1.236497 | up   |
| Com_4458_pos | 3-methyl-5-oxo-5-(4-toluidino)pentanoic acid             | C13 H17 N O3        | 235.12047 | 5.755 | 258.10976 | Full match   | No results   | No results | --         | --                                      | 0.48252557 | 0.01745243 | 1.410369 | down |
| Com_45_pos   | Pyridoxal                                                | C8 H9 N O3          | 167.0581  | 4.842 | 168.06538 | Full match   | No results   | No results | cpd:C00250 | Organoheterocyclic compounds            | 5.04095136 | 3.566E-07  | 1.605029 | up   |
| Com_4532_neg | Lauric acid ethyl ester                                  | C14 H28 O2          | 228.2088  | 8.167 | 227.20152 | Full match   | No results   | Full match | --         | Lipids and lipid-like molecules         | 3.72240046 | 1.1879E-06 | 1.33766  | up   |
| Com_4669_pos | 11β-Hydroxyandrosterone                                  | C19 H30 O3          | 323.2431  | 7.065 | 324.25038 | Invalid mass | No results   | No results | cpd:C14606 | Lipids and lipid-like molecules         | 2.25618017 | 0.00012604 | 1.442432 | up   |

|              |                                                           |                   |           |       |           |              |              |            |            |                                         |            |            |          |      |
|--------------|-----------------------------------------------------------|-------------------|-----------|-------|-----------|--------------|--------------|------------|------------|-----------------------------------------|------------|------------|----------|------|
| Com_4786_pos | 13,14-Dihydro prostaglandin E1                            | C20 H36 O5        | 338.24308 | 7.596 | 339.25036 | Invalid mass | No results   | No results | --         | Lipids and lipid-like molecules         | 2.29582279 | 0.00026676 | 1.637639 | up   |
| Com_4909_neg | 2-deoxyglucose-6-phosphate                                | C6 H13 O8 P       | 244.03543 | 1.266 | 289.03369 | No results   | No results   | Full match | --         | Organic acids and derivatives           | 0.23453408 | 0.01175167 | 1.082018 | down |
| Com_496_pos  | 4-Pyridoxic acid                                          | C8 H9 N O4        | 183.05308 | 4.784 | 184.06036 | No results   | No results   | Full match | cpd:C00847 | Organoheterocyclic compounds            | 6.84888367 | 2.4989E-05 | 1.936808 | up   |
| Com_4976_pos | ethyl 2-(benzylamino)-1,3-thiazole-5-carboxylate          | C13 H14 N2 O2 S   | 262.07397 | 5.609 | 263.0814  | Invalid mass | No results   | No results | --         | --                                      | 2.21700643 | 0.0004911  | 1.2196   | up   |
| Com_50_neg   | 17(S)-HpDHA                                               | C22 H32 O4        | 396.20128 | 5.41  | 395.19398 | Invalid mass | No results   | No results | --         | Lipids and lipid-like molecules         | 0.48696489 | 0.00194978 | 1.358106 | down |
| Com_500_pos  | Lysopg 18:1                                               | C24 H47 O9 P      | 510.29557 | 9.74  | 533.28482 | No results   | No results   | Full match | --         | Lipids and lipid-like molecules         | 0.04033645 | 0.03862517 | 1.234085 | down |
| Com_5002_neg | Pseudouridine                                             | C9 H12 N2 O6      | 244.0696  | 2.027 | 243.06232 | Full match   | No results   | Full match | cpd:C02067 | Nucleosides, nucleotides, and analogues | 0.33130795 | 1.4497E-07 | 1.281442 | down |
| Com_502_pos  | 3-(4-nitrophenyl)[1,2,3]triazolo[1,5-a]quinazolin-5-amine | C15 H10 N6 O2     | 306.08233 | 5.988 | 307.08961 | Invalid mass | No results   | No results | --         | --                                      | 3.19105784 | 0.00397406 | 1.543503 | up   |
| Com_5028_neg | Guanosine-3',5'-cyclic monophosphate                      | C10 H12 N5 O7 P   | 345.0479  | 2.439 | 344.04062 | No results   | Full match   | Full match | cpd:C00942 | Nucleosides, nucleotides, and analogues | 0.22508547 | 0.00423945 | 1.413752 | down |
| Com_5036_neg | Tyrosylalalanine                                          | C12 H16 N2 O4     | 252.11124 | 5.021 | 251.10394 | Full match   | No results   | No results | --         | Organic acids and derivatives           | 11.5051941 | 2.4715E-11 | 1.88723  | up   |
| Com_5076_neg | Propionyl-L-carnitine                                     | C10 H19 N O4      | 217.13137 | 5.797 | 216.12409 | No results   | No results   | Full match | cpd:C03017 | Lipids and lipid-like molecules         | 2.8411467  | 3.7101E-06 | 1.731324 | up   |
| Com_5099_neg | CDP                                                       | C9 H15 N3 O11 P2  | 403.01887 | 1.316 | 402.0116  | No results   | No results   | Full match | cpd:C00112 | Nucleosides, nucleotides, and analogues | 0.06858776 | 4.687E-05  | 1.762394 | down |
| Com_5106_pos | 2'-O-Methyladenosine                                      | C11 H15 N5 O4     | 264.08522 | 4.891 | 282.11941 | Invalid mass | Invalid mass | No results | --         | Nucleosides, nucleotides, and analogues | 8.84060829 | 1.3609E-06 | 1.651484 | up   |
| Com_5124_neg | Oxidized glutathione                                      | C20 H32 N6 O12 S2 | 612.15367 | 2.335 | 611.1464  | Full match   | Full match   | Full match | cpd:C00127 | Organic acids and derivatives           | 4.25506359 | 1.6356E-05 | 1.839694 | up   |
| Com_5181_pos | Adipamide                                                 | C6 H12 N2 O2      | 144.08957 | 1.468 | 145.09683 | No results   | No results   | Full match | --         | Lipids and lipid-like molecules         | 9.04122627 | 1.9491E-10 | 1.734836 | up   |
| Com_520_pos  | 8-Hydroxyquinoline                                        | C9 H7 N O         | 145.05262 | 5.777 | 146.05992 | Full match   | Full match   | No results | cpd:C19434 | Organoheterocyclic compounds            | 0.42793253 | 0.00832983 | 1.013947 | down |
| Com_5287_neg | Methylodopa                                               | C10 H13 N O4      | 211.08429 | 5.418 | 210.07697 | No results   | No results   | Full match | cpd:C07194 | Phenylpropanoids and polyketides        | 2.32838508 | 0.01809427 | 1.333459 | up   |
| Com_53_neg   | N-Acetyl-D-alloisoleucine                                 | C8 H15 N O3       | 173.1047  | 5.56  | 172.09742 | Full match   | Full match   | Full match | --         | Organic acids and derivatives           | 2.06084461 | 0.00017213 | 1.52712  | up   |
| Com_5311_pos | 2-Thio-acetyl MAGE                                        | C21 H42 O3 S      | 356.27785 | 6.606 | 357.28513 | Invalid mass | No results   | No results | --         | Organic acids and derivatives           | 3.93232209 | 9.9779E-06 | 1.703281 | up   |
| Com_5458_neg | N-Acetyl-L-aspartic acid                                  | C6 H9 N O5        | 175.04749 | 4.991 | 174.04022 | No results   | No results   | Full match | cpd:C01042 | Organic acids and derivatives           | 5.19747416 | 6.1297E-07 | 1.912016 | up   |
| Com_5464_pos | Azetidine-2-carboxylic acid                               | C4 H7 N O2        | 101.04798 | 5.23  | 102.05525 | No results   | No results   | Full match | cpd:C08267 | Organic acids and derivatives           | 5.45021496 | 8.8018E-07 | 1.81718  | up   |
| Com_5478_pos | GNK                                                       | C12 H23 N5 O5     | 634.34238 | 5.017 | 318.17847 | Invalid mass | No results   | No results | --         | --                                      | 0.17920319 | 5.6024E-06 | 1.70991  | down |
| Com_5514_pos | DI-3-Hydroxy-kynurenine                                   | C10 H12 N2 O4     | 224.07936 | 5.46  | 225.08664 | No results   | No results   | Full match | --         | Organic oxygen compounds                | 0.45236894 | 0.00423996 | 1.47846  | down |
| Com_5665_pos | 2,3,4-Trihydroxybenzoic acid                              | C7 H6 O5          | 170.02136 | 5.196 | 171.02863 | No results   | No results   | Full match | --         | Phenylpropanoids and polyketides        | 6.19798232 | 8.5112E-06 | 1.677538 | up   |
| Com_6095_pos | 3-(4-pyridylmethylidene)chroman-4-one                     | C15 H11 N O2      | 237.08218 | 6     | 238.08949 | Invalid mass | No results   | No results | --         | --                                      | 7.96749132 | 9.6314E-06 | 1.775071 | up   |
| Com_6115_neg | Levodopa                                                  | C9 H11 N O4       | 197.06869 | 4.805 | 242.06696 | No results   | No results   | Full match | cpd:C00355 | --                                      | 3.89231493 | 0.00022955 | 1.564869 | up   |
| Com_613_pos  | N-(1-methyl-3-phenyl-1H-pyrazol-5-yl)-N'-(2-thienyl)urea  | C15 H14 N4 O S    | 298.09269 | 5.486 | 299.09997 | Invalid mass | No results   | No results | --         | --                                      | 0.27758314 | 1.5622E-07 | 1.951297 | down |
| Com_6184_neg | Sedoheptulose 7-phosphate                                 | C7 H15 O10 P      | 290.04079 | 1.288 | 289.03357 | No results   | No results   | Full match | cpd:C05382 | Organic oxygen compounds                | 0.22709977 | 0.00430744 | 1.180068 | down |
| Com_6187_pos | 1,2,3,4-tetrahydropyrimidine-2,4-dione                    | C12 H13 N3 O2     | 231.10397 | 4.022 | 232.11124 | Invalid mass | No results   | No results | --         | --                                      | 14.7029574 | 1.5922E-05 | 1.664334 | up   |
| Com_6274_pos | Eicosapentaenoic acid                                     | C20 H30 O2        | 308.23443 | 7.994 | 309.24171 | Invalid mass | No results   | No results | cpd:C06428 | Lipids and lipid-like molecules         | 0.47860893 | 0.02011077 | 1.295828 | down |
| Com_630_pos  | LPE 16:0                                                  | C21 H44 N O7 P    | 453.28512 | 9.107 | 454.29236 | No results   | Full match   | Full match | --         | Lipids and lipid-like molecules         | 0.12903896 | 0.0094382  | 1.261987 | down |
| Com_631_neg  | 5-Hydroxytryptophan                                       | C11 H12 N2 O3     | 220.08466 | 4.977 | 219.07739 | Full match   | Full match   | Full match | cpd:C01017 | Organoheterocyclic compounds            | 2.21206171 | 0.00017009 | 1.669008 | up   |
| Com_6356_pos | 5-hydroxy-6,7-dimethoxy-2-phenyl-4H-chromen-4-one         | C17 H14 O5        | 336.04019 | 6.469 | 337.04747 | Invalid mass | No results   | No results | --         | --                                      | 0.32188981 | 0.00861773 | 1.13964  | down |
| Com_636_neg  | 2-Deoxyuridine                                            | C9 H12 N2 O5      | 228.0746  | 2.009 | 227.06733 | No results   | No results   | Full match | cpd:C00526 | Nucleosides, nucleotides, and analogues | 0.32435648 | 1.2091E-05 | 1.198222 | down |
| Com_6385_pos | N-(2-hydroxy-2-phenylethyl)-N'-(2-thienyl)urea            | C13 H14 N2 O2 S   | 262.07709 | 5.481 | 263.08437 | Full match   | No results   | No results | --         | --                                      | 0.13390173 | 0.00041204 | 1.720973 | down |

|              |                                                                    |                   |           |       |           |              |              |            |            |                                         |            |            |          |      |
|--------------|--------------------------------------------------------------------|-------------------|-----------|-------|-----------|--------------|--------------|------------|------------|-----------------------------------------|------------|------------|----------|------|
| Com_652_neg  | LPE 18:2                                                           | C23 H44 N O7 P    | 477.28629 | 9.059 | 476.27901 | No results   | Full match   | Full match | --         | Lipids and lipid-like molecules         | 0.15657962 | 0.01947591 | 1.154209 | down |
| Com_6620_pos | (±)9-HpODE                                                         | C18 H32 O4        | 336.22738 | 6.818 | 354.26114 | Invalid mass | No results   | No results | --         | --                                      | 2.51695037 | 0.01816371 | 1.169392 | up   |
| Com_677_neg  | Cytidine-5'-monophosphate                                          | C9 H14 N3 O8 P    | 323.0524  | 1.434 | 322.04512 | No results   | Full match   | Full match | cpd:C00055 | Nucleosides, nucleotides, and analogues | 0.10438774 | 0.00188491 | 1.490727 | down |
| Com_69_pos   | 5'-S-Methyl-5'-thioadenosine                                       | C11 H15 N5 O3 S   | 297.08939 | 5.126 | 298.09667 | Full match   | Full match   | Full match | cpd:C00170 | Nucleosides, nucleotides, and analogues | 0.23375606 | 1.4968E-06 | 1.734922 | down |
| Com_711_neg  | Xanthine                                                           | C5 H4 N4 O2       | 152.03288 | 2.173 | 151.0256  | Full match   | No results   | Full match | cpd:C00385 | Organoheterocyclic compounds            | 0.38598895 | 0.00533274 | 1.316867 | down |
| Com_7128_neg | Phe-Phe                                                            | C18 H20 N2 O3     | 312.14787 | 6.157 | 311.14059 | No results   | No results   | Full match | --         | Organic acids and derivatives           | 0.17721541 | 1.4995E-05 | 1.567007 | down |
| Com_7289_pos | (2E)-6-hydroxy-2-methyl-6-(4-methylphenyl)hept-2-enoic acid        | C15 H20 O3        | 270.11849 | 6.235 | 271.12576 | Invalid mass | No results   | No results | --         | --                                      | 3.10780491 | 7.4947E-05 | 1.460005 | up   |
| Com_73_neg   | 3,5-                                                               | C8 H9 N O4        | 183.05284 | 5.249 | 182.04556 | Full match   | No results   | Full match | --         | Organic acids and derivatives           | 3.01553567 | 0.00085732 | 1.612966 | up   |
| Com_7326_neg | LPE 20:5                                                           | C25 H42 N O7 P    | 499.27085 | 8.215 | 498.26358 | No results   | Full match   | No results | --         | Lipids and lipid-like molecules         | 0.2627919  | 5.3224E-05 | 1.556069 | down |
| Com_7478_pos | 2-OHE1-6-N3Ade                                                     | C23 H25 N5 O3     | 419.20378 | 4.976 | 420.21106 | Invalid mass | No results   | No results | --         | --                                      | 0.24620427 | 2.7147E-07 | 1.649056 | down |
| Com_7529_pos | L-Cystine                                                          | C6 H12 N2 O4 S2   | 240.02364 | 1.218 | 241.03092 | Full match   | Full match   | Full match | cpd:C00491 | Organic acids and derivatives           | 2.7638504  | 0.00554362 | 1.508138 | up   |
| Com_7643_neg | Fmoc-L-Isoleucine                                                  | C21 H23 N O4      | 353.16397 | 6.304 | 352.1567  | No results   | No results   | Full match | --         | Organic acids and derivatives           | 3.69637353 | 0.00081288 | 1.200609 | up   |
| Com_7662_pos | JNJ-1661010                                                        | C19 H19 N5 O S    | 365.13202 | 4.599 | 366.13929 | No results   | No results   | Full match | --         | Organoheterocyclic compounds            | 9.13921848 | 4.8954E-10 | 1.547427 | up   |
| Com_775_pos  | D-(+)-Maltose                                                      | C12 H22 O11       | 364.09778 | 1.324 | 365.10506 | Invalid mass | No results   | No results | cpd:C01971 | Organic oxygen compounds                | 0.25133243 | 0.03741849 | 1.184524 | down |
| Com_7813_pos | 3-(5,7-dimethoxy-4-oxo-4H-chromen-2-yl)propanoic acid              | C14 H14 O6        | 261.05277 | 5.807 | 279.08686 | Invalid mass | No results   | No results | --         | --                                      | 3.49455037 | 0.0003801  | 1.422867 | up   |
| Com_7826_pos | LPC 16:1-SN1                                                       | C24 H48 N O7 P    | 493.31659 | 8.716 | 494.32388 | No results   | Full match   | Full match | --         | --                                      | 0.35010084 | 0.00058953 | 1.184838 | down |
| Com_7973_pos | 1-(4-chlorophenyl)-4-hydroxy-6-isopropyl-3-phenylpyridin-2(1H)-one | C20 H18 Cl N O2   | 339.10045 | 6.109 | 340.10773 | Invalid mass | No results   | No results | --         | --                                      | 0.29292007 | 0.00034588 | 1.414449 | down |
| Com_8047_pos | ATP                                                                | C10 H16 N5 O13 P3 | 506.99597 | 4.783 | 508.00325 | No results   | No results   | Full match | cpd:C00002 | Nucleosides, nucleotides, and analogues | 0.45292387 | 2.9054E-05 | 1.66018  | down |
| Com_8122_neg | LysoPE 18:0                                                        | C23 H48 N O7 P    | 481.31799 | 9.185 | 480.31071 | No results   | No results   | Full match | --         | Lipids and lipid-like molecules         | 0.11536045 | 0.00173674 | 1.624922 | down |
| Com_8209_pos | Vitamin B2                                                         | C17 H20 N4 O6     | 376.1382  | 4.9   | 377.14548 | No results   | No results   | Full match | cpd:C00255 | Organoheterocyclic compounds            | 3.40953228 | 3.1E-06    | 1.553349 | up   |
| Com_826_pos  | NMK                                                                | C15 H29 N5 O5 S   | 746.35043 | 5.218 | 374.18249 | Invalid mass | No results   | No results | --         | --                                      | 2.01115448 | 0.01350442 | 1.028573 | up   |
| Com_83_neg   | Gallic acid                                                        | C7 H6 O5          | 124.01545 | 0.454 | 169.01366 | Invalid mass | Invalid mass | No results | cpd:C01424 | Benzenoids                              | 0.16200684 | 0.0427166  | 1.097544 | down |
| Com_8310_neg | Deoxycytidine                                                      | C9 H13 N3 O4      | 227.09039 | 3.359 | 226.08307 | No results   | No results   | Full match | cpd:C00881 | Nucleosides, nucleotides, and analogues | 0.1866019  | 0.00116187 | 1.129094 | down |
| Com_848_neg  | o-Toluic Acid                                                      | C8 H8 O2          | 136.05199 | 5.157 | 135.04444 | No results   | No results   | Full match | cpd:C07215 | --                                      | 3.54907264 | 2.5867E-06 | 1.487272 | up   |
| Com_85_pos   | Hypoxanthine                                                       | C5 H4 N4 O        | 136.03843 | 3.678 | 137.04571 | Full match   | Full match   | Full match | cpd:C00262 | Organoheterocyclic compounds            | 20.572297  | 1.783E-08  | 1.339864 | up   |
| Com_853_neg  | Riboflavin                                                         | C17 H20 N4 O6     | 376.13905 | 5.287 | 375.13152 | Full match   | Full match   | Full match | cpd:C00255 | Organoheterocyclic compounds            | 4.92811271 | 9.3934E-07 | 1.870874 | up   |
| Com_8621_pos | Proscillaridin A                                                   | C30 H42 O8        | 530.29522 | 6.33  | 531.3025  | Invalid mass | No results   | No results | --         | Lipids and lipid-like molecules         | 6.02750521 | 1.0607E-08 | 1.706805 | up   |
| Com_8957_neg | LPC 14:0                                                           | C22 H46 N O7 P    | 513.30753 | 8.211 | 512.30025 | No results   | Invalid mass | No results | cpd:C04230 | Lipids and lipid-like molecules         | 0.24130776 | 5.3133E-07 | 1.201013 | down |
| Com_9_neg    | 3-Phenyllactic acid                                                | C9 H10 O3         | 166.06238 | 5.599 | 165.0551  | Full match   | Full match   | Full match | cpd:C01479 | Phenylpropanoids and polyketides        | 14.2549543 | 1.3897E-07 | 1.668337 | up   |
| Com_9089_neg | LPE 20:4                                                           | C25 H44 N O7 P    | 501.28674 | 8.704 | 500.27946 | No results   | Full match   | No results | --         | Lipids and lipid-like molecules         | 0.19256297 | 0.04092099 | 1.26068  | down |
| Com_9125_pos | Deoxyinosine                                                       | C10 H12 N4 O4     | 252.0855  | 4.021 | 275.07481 | No results   | No results   | Full match | cpd:C05512 | Nucleosides, nucleotides, and analogues | 8.74129394 | 6.1979E-09 | 1.820265 | up   |
| Com_9270_neg | 5-Methylcytidine                                                   | C10 H15 N3 O5     | 211.09585 | 1.872 | 256.09419 | No results   | Invalid mass | No results | --         | Nucleosides, nucleotides, and analogues | 0.14551288 | 1.1866E-05 | 1.747062 | down |
| Com_9307_neg | LPG 16:2                                                           | C22 H41 O9 P      | 480.24989 | 8.208 | 479.24261 | No results   | Full match   | No results | --         | Lipids and lipid-like molecules         | 0.35285657 | 0.00711701 | 1.481996 | down |
| Com_937_pos  | Valylproline                                                       | C10 H18 N2 O3     | 214.13154 | 5.213 | 215.13882 | Full match   | No results   | No results | --         | Organic acids and derivatives           | 0.32504023 | 6.1799E-05 | 1.544039 | down |
| Com_9375_neg | Cystine                                                            | C6 H12 N2 O4 S2   | 240.02394 | 1.252 | 239.01666 | No results   | No results   | Full match | cpd:C01420 | Organic acids and derivatives           | 3.31853643 | 0.00617313 | 1.507369 | up   |
| Com_976_neg  | Prostaglandin A2                                                   | C20 H30 O4        | 370.18568 | 5.385 | 369.1784  | Invalid mass | No results   | No results | cpd:C05953 | Lipids and lipid-like molecules         | 0.27169875 | 5.0956E-07 | 1.749922 | down |
| Com_9973_pos | beta-Nicotinamide adenine dinucleotide phosphate                   | C21 H28 N7 O17 P3 | 743.07407 | 1.393 | 372.54431 | No results   | No results   | Full match | cpd:C00006 | Nucleosides, nucleotides, and analogues | 0.19562194 | 0.0002509  | 1.576589 | down |

Table S7: DEMs in XDR vs. DS strains.

| Compound ID   | Name                                                          | Formula           | Molecular Weight | RT [min] | m/z       | mzCloud Results | mzVault Results | MassList Results | KEGG ID    | ClassyFire functional classification    | FC XDR/DS  | P-value XDR/DS | VIP      | Regulate |
|---------------|---------------------------------------------------------------|-------------------|------------------|----------|-----------|-----------------|-----------------|------------------|------------|-----------------------------------------|------------|----------------|----------|----------|
| Com_3465_pos  | Vatalanib dihydrochloride                                     | C20 H15 Cl N4     | 324.11761        | 5.633    | 347.1068  | Invalid mass    | No results      | No results       | --         | --                                      | 21.2008979 | 3.8723E-11     | 1.805415 | up       |
| Com_3402_pos  | 1-(3-phenylpropanoyl)-4-piperidinecarboxylic acid             | C15 H19 N O3      | 598.18792        | 4.756    | 300.10123 | Invalid mass    | No results      | No results       | --         | --                                      | 30.9387387 | 6.3383E-11     | 1.65652  | up       |
| Com_3886_neg  | 2-Hydroxyestradiol                                            | C18 H24 O3        | 288.16888        | 5.511    | 287.1616  | Invalid mass    | No results      | No results       | cpd:C05301 | Lipids and lipid-like molecules         | 0.16447102 | 3.3355E-10     | 1.508374 | down     |
| Com_8957_neg  | LPC 14:0                                                      | C22 H46 N O7 P    | 513.30753        | 8.211    | 512.30025 | No results      | Invalid mass    | No results       | cpd:C04230 | Lipids and lipid-like molecules         | 0.08740985 | 1.1168E-09     | 1.836046 | down     |
| Com_4269_pos  | Stanozolol                                                    | C21 H32 N2 O      | 328.24687        | 6.108    | 329.25415 | Invalid mass    | No results      | No results       | cpd:C07311 | Lipids and lipid-like molecules         | 0.09893767 | 1.6674E-09     | 1.463412 | down     |
| Com_1249_pos  | LPE 14:1                                                      | C19 H38 N O7 P    | 423.23826        | 7.633    | 424.24548 | No results      | Full match      | No results       | --         | Lipids and lipid-like molecules         | 0.22534396 | 2.458E-09      | 1.758186 | down     |
| Com_993_neg   | 1-Methylguanosine                                             | C11 H15 N5 O5     | 297.1076         | 3.708    | 296.10032 | No results      | No results      | Full match       | cpd:C04545 | Nucleosides, nucleotides, and analogues | 4.64607784 | 3.4837E-09     | 1.607284 | up       |
| Com_562_pos   | 3-((5-Phenylloxazol-2-yl)amino)benzotrile                     | C16 H11 N3 O      | 261.08989        | 5.916    | 262.09717 | Full match      | No results      | No results       | --         | Organoheterocyclic compounds            | 0.19710376 | 5.2335E-09     | 1.740996 | down     |
| Com_4900_neg  | LPE 18:4                                                      | C23 H40 N O7 P    | 473.25482        | 7.961    | 472.24754 | No results      | Full match      | No results       | --         | Lipids and lipid-like molecules         | 6.27522194 | 1.3363E-08     | 1.156152 | up       |
| Com_1037_pos  | 1,5-dimethyl-N-(4-morpholinobenzyl)-1H-pyrazole-3-carboxamide | C17 H22 N4 O2     | 628.34787        | 4.985    | 315.18121 | Invalid mass    | No results      | No results       | --         | --                                      | 0.19304366 | 1.3678E-08     | 1.820439 | down     |
| Com_3874_pos  | 2-acetamido-3-(4-methoxyphenyl)propanoic acid                 | C12 H15 N O4      | 237.10013        | 5.126    | 238.10732 | Full match      | No results      | Full match       | --         | --                                      | 2.65463882 | 1.551E-08      | 1.738027 | up       |
| Com_208_neg   | Pantetheine                                                   | C11 H22 N2 O4 S   | 278.13032        | 5.27     | 277.12299 | No results      | No results      | Full match       | cpd:C00831 | Organic acids and derivatives           | 5.75198788 | 1.6542E-08     | 1.772333 | up       |
| Com_6128_pos  | LysoPE 18:2                                                   | C23 H44 N O7 P    | 477.28537        | 7.481    | 478.29264 | No results      | No results      | Full match       | --         | --                                      | 0.16201795 | 1.8013E-08     | 1.721252 | down     |
| Com_2170_neg  | LPE 18:3                                                      | C23 H42 N O7 P    | 475.27059        | 8.221    | 474.26332 | No results      | Full match      | No results       | --         | Lipids and lipid-like molecules         | 0.08833778 | 2.3622E-08     | 1.74166  | down     |
| Com_1944_pos  | 5-Hydroxytryptophol                                           | C10 H11 N O2      | 177.07893        | 5.484    | 178.08623 | No results      | No results      | Full match       | --         | Organoheterocyclic compounds            | 3.07642003 | 3.3547E-08     | 1.555927 | up       |
| Com_4063_neg  | Estrone                                                       | C18 H22 O2        | 540.32908        | 5.477    | 539.32177 | Invalid mass    | No results      | No results       | cpd:C00468 | Lipids and lipid-like molecules         | 0.14035383 | 5.5582E-08     | 1.430078 | down     |
| Com_1000_neg  | N-Acetylaspartic acid                                         | C6 H9 N O5        | 175.04762        | 1.869    | 174.04035 | Full match      | Full match      | Full match       | --         | Organic acids and derivatives           | 4.48886684 | 7.7914E-08     | 1.763868 | up       |
| Com_10905_pos | Tauroursodeoxycholic acid                                     | C26 H45 N O6 S    | 499.29842        | 5.324    | 500.30569 | No results      | No results      | Full match       | cpd:C16868 | Lipids and lipid-like molecules         | 0.25450623 | 8.5331E-08     | 1.768041 | down     |
| Com_1556_pos  | 4-ethoxy-7,9-dimethylpyrido[3',2':4,5]thieno[3,2-d]pyrimidine | C13 H13 N3 O S    | 259.08178        | 5.624    | 260.08906 | Invalid mass    | No results      | No results       | --         | --                                      | 0.22567544 | 8.7122E-08     | 1.725478 | down     |
| Com_190_pos   | gamma-Glutamylleucine                                         | C11 H20 N2 O5     | 260.1371         | 5.304    | 261.1444  | No results      | Full match      | Full match       | --         | Organic acids and derivatives           | 3.45079763 | 9.3456E-08     | 1.817079 | up       |
| Com_1685_pos  | PC O-16:1                                                     | C24 H48 N O7 P    | 493.31644        | 8.478    | 494.32372 | No results      | Full match      | Full match       | --         | --                                      | 0.04777148 | 1.2491E-07     | 1.821225 | down     |
| Com_1348_pos  | Obscurolide A1                                                | C15 H17 N O5      | 323.13799        | 5.049    | 324.14519 | Invalid mass    | No results      | No results       | --         | Benzenoids                              | 0.33396043 | 2.3644E-07     | 1.604479 | down     |
| Com_1818_pos  | (4-amino-1,2,5-oxadiazol-3-yl)(morpholino)methanone           | C7 H11 N5 O3      | 213.08601        | 1.264    | 214.09329 | Full match      | No results      | No results       | --         | --                                      | 3.6958145  | 2.6548E-07     | 1.772203 | up       |
| Com_5478_pos  | GNK                                                           | C12 H23 N5 O5     | 634.34238        | 5.017    | 318.17847 | Invalid mass    | No results      | No results       | --         | --                                      | 0.16512167 | 3.0418E-07     | 1.623692 | down     |
| Com_2791_pos  | PE 9:0_9:0                                                    | C23 H46 N O8 P    | 495.29606        | 7.705    | 496.30328 | No results      | Full match      | No results       | --         | --                                      | 0.13533074 | 5.4533E-07     | 1.673713 | down     |
| Com_1424_neg  | LPC 16:1                                                      | C24 H48 N O7 P    | 539.32316        | 8.471    | 538.31589 | No results      | Invalid mass    | No results       | cpd:C04230 | Lipids and lipid-like molecules         | 0.06911985 | 5.4683E-07     | 1.822748 | down     |
| Com_3684_pos  | Alloxan                                                       | C4 H4 N2 O5       | 160.01143        | 1.384    | 159.00422 | No results      | No results      | Full match       | --         | Organoheterocyclic compounds            | 5.01469771 | 7.0271E-07     | 1.779697 | up       |
| Com_315_neg   | N-lactoyl-phenylalanine                                       | C12 H15 N O4      | 237.10021        | 5.62     | 236.09293 | No results      | No results      | Full match       | --         | Organic acids and derivatives           | 0.23332311 | 1.0397E-06     | 1.728871 | down     |
| Com_6163_pos  | 6-(Dimethylamino)purine                                       | C7 H9 N5          | 163.08578        | 5.16     | 164.09266 | No results      | No results      | Full match       | --         | Organoheterocyclic compounds            | 0.26146143 | 1.1068E-06     | 1.1173   | down     |
| Com_1282_pos  | Gly-Phe                                                       | C11 H14 N2 O3     | 222.10015        | 5.17     | 223.10749 | No results      | No results      | Full match       | --         | Organic acids and derivatives           | 0.46851041 | 1.2246E-06     | 1.744491 | down     |
| Com_1049_neg  | Esculin                                                       | C15 H16 O9        | 340.08592        | 5.114    | 339.07866 | Invalid mass    | No results      | No results       | cpd:C09264 | Phenylpropanoids and polyketides        | 5.0794853  | 1.4866E-06     | 1.72246  | up       |
| Com_1353_pos  | Physostigmine                                                 | C15 H21 N3 O2     | 275.16312        | 4.987    | 276.17037 | Full match      | No results      | No results       | cpd:C06535 | Organoheterocyclic compounds            | 0.3886898  | 1.9544E-06     | 1.59015  | down     |
| Com_5849_neg  | (+/-)12(13)-DiHOME                                            | C18 H34 O4        | 296.2354         | 7.254    | 295.22812 | Invalid mass    | No results      | No match         | cpd:C14829 | Lipids and lipid-like molecules         | 0.10883509 | 2.0205E-06     | 1.636124 | down     |
| Com_5772_pos  | 7,8-Dihydrofolate                                             | C19 H21 N7 O6     | 443.15703        | 5.755    | 444.16431 | No results      | No results      | Full match       | cpd:C00415 | --                                      | 7.22692687 | 2.0632E-06     | 1.624647 | up       |
| Com_2642_neg  | Guanosine 5'-diphosphate (GDP)                                | C10 H15 N5 O11 P2 | 443.0253         | 1.479    | 442.01803 | Full match      | No results      | Full match       | cpd:C00035 | Nucleosides, nucleotides, and analogues | 0.04907788 | 2.5509E-06     | 1.586937 | down     |
| Com_78_pos    | 2'-Deoxyadenosine                                             | C10 H13 N5 O3     | 251.10162        | 3.707    | 252.1089  | Full match      | Full match      | Full match       | cpd:C00559 | Nucleosides, nucleotides, and analogues | 2.98284496 | 2.582E-06      | 1.744922 | up       |

|              |                                                                                                |                  |           |       |           |              |              |            |            |                                         |            |            |          |      |
|--------------|------------------------------------------------------------------------------------------------|------------------|-----------|-------|-----------|--------------|--------------|------------|------------|-----------------------------------------|------------|------------|----------|------|
| Com_571_pos  | Acetylcarnitine                                                                                | C9 H17 N O4      | 203.11575 | 5.622 | 226.10483 | No results   | No results   | Full match | cpd:C02571 | Lipids and lipid-like molecules         | 0.29953272 | 2.6563E-06 | 1.573558 | down |
| Com_205_pos  | 2-(1,3-dimethyl-1H-pyrazol-5-yl)-1H-isoindole-1,3(2H)-dione                                    | C13 H11 N3 O2    | 241.0849  | 5.474 | 242.09217 | Full match   | No results   | No results | --         | --                                      | 0.08866853 | 2.9291E-06 | 1.615541 | down |
| Com_9961_neg | myricetin 3-O-beta-D-galactopyranoside                                                         | C21 H20 O13      | 480.08997 | 2.146 | 479.08269 | Full match   | No results   | No results | --         | --                                      | 0.14547628 | 3.1107E-06 | 1.807449 | down |
| Com_1773_pos | 2-[(3S)-1-(Benzylsulfonyl)-3-pyrrolidinyl]-1-methyl-1H-benzimidazole                           | C19 H21 N3 O2 S  | 377.11998 | 5.001 | 378.12726 | Invalid mass | No results   | No results | --         | Organoheterocyclic compounds            | 2.4938584  | 3.4025E-06 | 1.171656 | up   |
| Com_16_neg   | N-Acetyl-L-methionine                                                                          | C7 H13 N O3 S    | 191.06125 | 5.238 | 190.05395 | Full match   | Full match   | Full match | cpd:C02712 | Organic acids and derivatives           | 3.61559521 | 3.8588E-06 | 1.281069 | up   |
| Com_1445_pos | Guanosine monophosphate 5-(tert-butyl)-2-methyl-N-(5-methyl-3-isoxazolyl)-3-furamide           | C10 H14 N5 O8 P  | 363.0575  | 1.591 | 364.06478 | No results   | No results   | Full match | cpd:C00144 | Nucleosides, nucleotides, and analogues | 0.08627341 | 4.0151E-06 | 1.450262 | down |
| Com_285_neg  | (5-methyl-3-isoxazolyl)-3-furamide                                                             | C14 H18 N2 O3    | 262.13205 | 5.23  | 261.12477 | Full match   | No results   | Full match | --         | --                                      | 0.17665421 | 4.203E-06  | 1.781714 | down |
| Com_3168_pos | Oxohongdenafil                                                                                 | C25 H32 N6 O4    | 458.27272 | 5.336 | 459.28067 | Invalid mass | No results   | No results | --         | Organic oxygen compounds                | 0.22061381 | 4.3112E-06 | 1.561    | down |
| Com_4669_pos | 11 $\beta$ -Hydroxyandrosterone                                                                | C19 H30 O3       | 323.2431  | 7.065 | 324.25038 | Invalid mass | No results   | No results | cpd:C14606 | Lipids and lipid-like molecules         | 2.89030532 | 4.5467E-06 | 1.67111  | up   |
| Com_1134_neg | N-Acetyl-DL-tryptophan                                                                         | C13 H14 N2 O3    | 246.10066 | 5.521 | 245.0932  | Full match   | Full match   | Full match | --         | Organic acids and derivatives           | 3.13063958 | 4.7838E-06 | 1.672463 | up   |
| Com_5464_pos | Azetidine-2-carboxylic acid 4-phenyl-6-(2-thienyl)-2,3,4,5-                                    | C4 H7 N O2       | 101.04798 | 5.23  | 102.05525 | No results   | No results   | Full match | cpd:C08267 | Organic acids and derivatives           | 4.46017501 | 4.8823E-06 | 1.419863 | up   |
| Com_2286_pos | tetrahydropyridazin-3-one (3R)-8-hydroxy-3-(4-hydroxyphenyl)-3,4-dihydro-1H-2-benzopyran-1-one | C14 H12 N2 O S   | 256.07069 | 5.177 | 257.07796 | Invalid mass | No results   | No results | --         | --                                      | 5.05925145 | 5.0862E-06 | 1.72306  | up   |
| Com_2287_pos | (3R)-8-hydroxy-3-(4-hydroxyphenyl)-3,4-dihydro-1H-2-benzopyran-1-one                           | C15 H12 O4       | 128.03542 | 5.181 | 257.078   | Invalid mass | No results   | No results | --         | --                                      | 5.05925145 | 5.0862E-06 | 1.723909 | up   |
| Com_1673_pos | Melatonin                                                                                      | C13 H16 N2 O2    | 232.12105 | 5.053 | 233.12836 | Full match   | No results   | Full match | cpd:C01598 | Organoheterocyclic compounds            | 0.10224504 | 5.7171E-06 | 1.764178 | down |
| Com_3486_neg | 16 $\alpha$ -Hydroxyestrone                                                                    | C18 H22 O3       | 304.16372 | 5.443 | 303.15645 | Invalid mass | No results   | No results | cpd:C05300 | Lipids and lipid-like molecules         | 0.226773   | 7.196E-06  | 1.6942   | down |
| Com_6484_neg | 11-Dehydro-thromboxane                                                                         | C20 H32 O6       | 404.19692 | 6.502 | 403.18964 | Invalid mass | No results   | No results | cpd:C05964 | Lipids and lipid-like molecules         | 3.08191804 | 7.2407E-06 | 1.693314 | up   |
| Com_3158_neg | LPG 14:1                                                                                       | C20 H39 O9 P     | 454.23382 | 7.623 | 453.22654 | No results   | Full match   | No results | --         | Lipids and lipid-like molecules         | 0.34132555 | 8.5294E-06 | 1.474827 | down |
| Com_7128_neg | Phe-Phe                                                                                        | C18 H20 N2 O3    | 312.14787 | 6.157 | 311.14059 | No results   | No results   | Full match | --         | Organic acids and derivatives           | 0.12158553 | 8.6921E-06 | 1.649749 | down |
| Com_1374_neg | 4-Methyl-2-Oxopentanoic Acid                                                                   | C6 H10 O3        | 130.06239 | 5.196 | 175.0607  | No results   | No results   | Full match | --         | --                                      | 3.33858522 | 8.7066E-06 | 1.751658 | up   |
| Com_4731_pos | PE 18:0                                                                                        | C23 H46 N O8 P   | 517.27809 | 7.697 | 518.28535 | No results   | Invalid mass | No results | cpd:C00350 | Lipids and lipid-like molecules         | 0.16284975 | 9.2131E-06 | 1.573068 | down |
| Com_4346_pos | Desthiobiotin                                                                                  | C10 H18 N2 O3    | 214.13148 | 3.746 | 215.13875 | Full match   | No results   | No results | cpd:C01909 | Organoheterocyclic compounds            | 0.17752328 | 9.6068E-06 | 1.601002 | down |
| Com_1258_pos | Phe-Pro                                                                                        | C14 H18 N2 O3    | 262.13112 | 5.648 | 263.1384  | No results   | No results   | Full match | --         | Organic acids and derivatives           | 0.16155083 | 1.0002E-05 | 1.733197 | down |
| Com_159_pos  | N-Acetylmethionine                                                                             | C7 H13 N O3 S    | 191.06144 | 5.236 | 214.05068 | No results   | Full match   | Full match | cpd:C02712 | Organic acids and derivatives           | 5.45676162 | 1.1843E-05 | 1.403443 | up   |
| Com_138_pos  | Asp-Phe methyl ester                                                                           | C14 H18 N2 O5    | 294.12133 | 5.311 | 295.1286  | No results   | No results   | Full match | --         | --                                      | 2.21999348 | 1.3997E-05 | 1.683686 | up   |
| Com_1703_pos | UDP                                                                                            | C9 H14 N2 O12 P2 | 404.0019  | 4.715 | 405.0091  | No results   | No results   | Full match | cpd:C00015 | Nucleosides, nucleotides, and analogues | 3.39702747 | 1.4604E-05 | 1.744452 | up   |
| Com_130_neg  | 3-[(methoxycarbonyl)amino]-2,2,3-trimethylbutanoic acid                                        | C9 H17 N O4      | 203.11558 | 5.622 | 202.1083  | Full match   | No results   | Full match | --         | --                                      | 0.36947864 | 1.4645E-05 | 1.574236 | down |
| Com_1166_neg | Biotin                                                                                         | C10 H16 N2 O3 S  | 244.08833 | 5.323 | 243.08105 | Full match   | Full match   | Full match | cpd:C00120 | Organoheterocyclic compounds            | 2.03850789 | 1.559E-05  | 1.635052 | up   |
| Com_3191_neg | Cytosine                                                                                       | C4 H5 N3 O       | 111.04274 | 1.456 | 156.04096 | No results   | No results   | Full match | cpd:C00380 | Organoheterocyclic compounds            | 4.8243383  | 1.685E-05  | 1.531888 | up   |
| Com_2737_neg | LPC 16:0                                                                                       | C24 H50 N O7 P   | 541.33908 | 9.193 | 540.3318  | No results   | Invalid mass | No results | cpd:C04230 | Lipids and lipid-like molecules         | 0.03326642 | 1.8976E-05 | 1.750094 | down |
| Com_6810_pos | 6-styryl-3-phenyl-2,5-dihydro-1,2,4-triazin-5-one                                              | C17 H13 N3 O     | 275.10555 | 7.731 | 276.11284 | Full match   | No results   | No results | --         | --                                      | 3.1936772  | 1.917E-05  | 1.364578 | up   |
| Com_3179_pos | 6,6-dimethyl-4-piperidino-5,6-dihydro-2H-thiine-2-thione                                       | C12 H19 N S2     | 241.09256 | 5.009 | 242.09984 | Invalid mass | No results   | No results | --         | --                                      | 3.03738193 | 2.0377E-05 | 1.438856 | up   |

|              |                                                                        |                   |           |       |           |              |              |            |            |                                         |            |            |          |      |
|--------------|------------------------------------------------------------------------|-------------------|-----------|-------|-----------|--------------|--------------|------------|------------|-----------------------------------------|------------|------------|----------|------|
| Com_1993_neg | 2-[(3S)-1-(Cyclohexylmethyl)-3-pyrrolidinyl]-5-fluoro-1H-benzimidazole | C18 H24 F N3      | 301.20057 | 5.34  | 300.19329 | Invalid mass | No results   | No results | --         | Organoheterocyclic compounds            | 0.07195943 | 2.0593E-05 | 1.600562 | down |
| Com_2394_pos | 4-(3,4-dihydro-2H-1,5-benzodioxepin-7-ylamino)-4-oxobutanoic acid      | C13 H15 N O5      | 287.07662 | 5.523 | 288.08389 | Invalid mass | No results   | No results | --         | --                                      | 3.8745332  | 2.2865E-05 | 1.486711 | up   |
| Com_4929_neg | LPE 10:0                                                               | C15 H32 N O7 P    | 369.19205 | 6.565 | 368.18476 | No results   | Full match   | No results | cpd:C04230 | Lipids and lipid-like molecules         | 0.16666274 | 2.7164E-05 | 1.666296 | down |
| Com_3292_pos | 1-(4-hydroxyphenyl)propane-1,2-diol                                    | C9 H12 O3         | 190.0586  | 1.347 | 191.06587 | Invalid mass | No results   | No match   | --         | --                                      | 14.7694627 | 2.7542E-05 | 1.645455 | up   |
| Com_4547_pos | 5-[4-(tert-butyl)phenyl]-1,3,4-oxadiazole-2-thiol                      | C12 H14 N2 O S    | 234.07956 | 5.727 | 257.06907 | Invalid mass | No results   | No results | --         | --                                      | 2.35498949 | 2.9205E-05 | 1.555256 | up   |
| Com_1238_neg | DL-Indole-3-lactic acid                                                | C11 H11 N O3      | 205.07356 | 5.882 | 204.06628 | No results   | No results   | Full match | --         | Organoheterocyclic compounds            | 0.28347092 | 3.0445E-05 | 1.320537 | down |
| Com_1803_pos | 1-allyl-4,5-diphenyl-2-(2-thienyl)-1H-imidazole                        | C22 H18 N2 S      | 342.12208 | 5.4   | 343.12936 | Invalid mass | No results   | No results | --         | --                                      | 6.3107666  | 3.0512E-05 | 1.312366 | up   |
| Com_7190_neg | 8-Aminooctanoic acid                                                   | C8 H17 N O2       | 159.12545 | 5.618 | 158.11819 | No results   | No results   | Full match | --         | Organic acids and derivatives           | 0.26882702 | 3.081E-05  | 1.610041 | down |
| Com_1708_neg | Guanosine monophosphate                                                | C10 H14 N5 O8 P   | 363.05875 | 1.52  | 362.05148 | Full match   | Full match   | Full match | cpd:C00144 | Nucleosides, nucleotides, and analogues | 0.13562059 | 3.3669E-05 | 1.483244 | down |
| Com_7352_neg | Glu-Glu                                                                | C10 H16 N2 O7     | 276.09627 | 1.446 | 275.08899 | No results   | No results   | Full match | cpd:C01425 | Organic acids and derivatives           | 3.57850712 | 3.4556E-05 | 1.534331 | up   |
| Com_1217_neg | Pantothenic acid                                                       | C9 H17 N O5       | 219.1106  | 5.015 | 218.10331 | Full match   | Full match   | Full match | cpd:C00864 | Organic oxygen compounds                | 2.04564255 | 3.9295E-05 | 1.304703 | up   |
| Com_5124_neg | L-Glutathione oxidized                                                 | C20 H32 N6 O12 S2 | 612.15367 | 2.335 | 611.1464  | Full match   | Full match   | Full match | cpd:C00127 | Organic acids and derivatives           | 2.92997955 | 4.3855E-05 | 1.233481 | up   |
| Com_2180_pos | 5-Methyluridine                                                        | C10 H14 N2 O6     | 258.085   | 4.842 | 259.09221 | No results   | No results   | Full match | --         | Nucleosides, nucleotides, and analogues | 3.3751319  | 6.2169E-05 | 1.62481  | up   |
| Com_1238_pos | EPH                                                                    | C16 H23 N5 O6     | 381.1663  | 5.428 | 382.17357 | Full match   | No results   | No results | --         | --                                      | 0.0991221  | 6.8501E-05 | 1.605689 | down |
| Com_1756_neg | D-Xyonic Acid                                                          | C5 H10 O6         | 166.04737 | 5.175 | 377.09293 | No results   | No results   | Full match | --         | Organic oxygen compounds                | 0.08361452 | 6.9953E-05 | 1.541806 | down |
| Com_5099_neg | CDP                                                                    | C9 H15 N3 O11 P2  | 403.01887 | 1.316 | 402.0116  | No results   | No results   | Full match | cpd:C00112 | Nucleosides, nucleotides, and analogues | 0.11231742 | 7.4359E-05 | 1.362888 | down |
| Com_404_neg  | 2-Deoxyribose 5-phosphate                                              | C5 H11 O7 P       | 214.02416 | 1.381 | 213.01688 | Full match   | Full match   | Full match | --         | Organic oxygen compounds                | 2.19198478 | 7.9336E-05 | 1.656839 | up   |
| Com_153_pos  | Tyramine                                                               | C8 H11 N O        | 137.08408 | 5.404 | 120.08081 | No results   | No results   | Full match | cpd:C00483 | Benzenoids                              | 0.23472109 | 8.6184E-05 | 1.410392 | down |
| Com_3764_pos | N-acetyl-L-ornithine                                                   | C7 H14 N2 O3      | 174.10089 | 5.467 | 366.23589 | No results   | No results   | Full match | cpd:C00437 | Organic acids and derivatives           | 0.12077924 | 9.2962E-05 | 1.719375 | down |
| Com_1296_neg | Hippuric acid                                                          | C9 H9 N O3        | 179.05789 | 5.927 | 178.05059 | No results   | No results   | Full match | cpd:C01586 | Benzenoids                              | 2.52801242 | 9.5561E-05 | 1.409447 | up   |
| Com_228_neg  | Cysteinylglycine                                                       | C5 H10 N2 O3 S    | 178.04086 | 5.225 | 177.03358 | Full match   | No results   | Full match | --         | Organic acids and derivatives           | 0.0519155  | 9.8899E-05 | 1.658331 | down |
| Com_845_pos  | JWH 250 N-pentanoic acid                                               | C22 H23 N O4      | 365.15825 | 4.875 | 366.16553 | Invalid mass | No results   | No results | --         | Organoheterocyclic compounds            | 0.20688106 | 9.9821E-05 | 1.624121 | down |
| Com_7826_pos | LPC 16:1-SN1                                                           | C24 H48 N O7 P    | 493.31659 | 8.716 | 494.32388 | No results   | Full match   | Full match | --         | --                                      | 0.18198223 | 0.0001022  | 1.707855 | down |
| Com_4789_neg | Feruloyl Putrescine                                                    | C14 H20 N2 O3     | 264.14769 | 5.304 | 263.14046 | No results   | No results   | Full match | cpd:C10497 | Phenylpropanoids and polyketides        | 0.23722564 | 0.00011648 | 1.484596 | down |
| Com_3041_neg | D-Erythrose 4-phosphate                                                | C4 H9 O7 P        | 200.00827 | 1.289 | 199.001   | No results   | No results   | Full match | cpd:C00279 | --                                      | 2.55932697 | 0.00011873 | 1.575672 | up   |
| Com_9258_pos | 4-acetyl-4-(ethoxycarbonyl)heptanedi                                   | C12 H18 O7        | 296.08746 | 7.747 | 297.09469 | Invalid mass | No results   | No results | --         | --                                      | 2.94811658 | 0.00011949 | 1.15817  | up   |
| Com_956_pos  | N-(p-Coumaroyl) serotonin                                              | C19 H18 N2 O3     | 322.12827 | 5.703 | 323.13554 | Invalid mass | No results   | No results | --         | Organoheterocyclic compounds            | 2.21023936 | 0.0001225  | 1.644048 | up   |
| Com_777_pos  | gamma-Glutamyltyrosine                                                 | C14 H18 N2 O6     | 293.0897  | 4.937 | 311.12353 | No results   | Invalid mass | No results | --         | Organic acids and derivatives           | 2.09667019 | 0.0001235  | 1.624843 | up   |
| Com_973_pos  | TQH                                                                    | C15 H24 N6 O6     | 384.16905 | 5.961 | 385.17633 | Invalid mass | No results   | No results | --         | --                                      | 4.6551448  | 0.00013059 | 1.371664 | up   |
| Com_543_pos  | indoline-2-carboxylic acid                                             | C9 H9 N O2        | 163.06324 | 5.3   | 164.07055 | Full match   | No results   | Full match | --         | --                                      | 3.72497417 | 0.00014719 | 1.227944 | up   |
| Com_9878_pos | Metanephrine                                                           | C10 H15 N O3      | 197.10504 | 5.229 | 198.1124  | No results   | No results   | Full match | cpd:C05588 | Benzenoids                              | 2.82091847 | 0.00014904 | 1.557811 | up   |
| Com_1177_pos | Guanine                                                                | C5 H5 N5 O        | 151.04927 | 1.617 | 152.05655 | No results   | No results   | Full match | cpd:C00242 | Organoheterocyclic compounds            | 0.28867332 | 0.00016539 | 1.443287 | down |
| Com_2907_pos | GPK                                                                    | C13 H24 N4 O4     | 600.36274 | 5.381 | 301.18864 | Invalid mass | No results   | No results | --         | --                                      | 0.22761538 | 0.0001684  | 1.681188 | down |
| Com_4550_neg | 6-phospho-D-glucono-1,5-lactone                                        | C6 H11 O9 P       | 258.01324 | 5.076 | 257.00597 | No results   | No results   | Full match | cpd:C01236 | --                                      | 0.46674022 | 0.00017399 | 1.394361 | down |
| Com_6115_neg | Levodopa                                                               | C9 H11 N O4       | 197.06869 | 4.805 | 242.06696 | No results   | No results   | Full match | cpd:C00355 | --                                      | 3.55025732 | 0.00017586 | 1.350327 | up   |
| Com_6551_pos | MAG (18:3)                                                             | C21 H36 O4        | 352.26078 | 7.269 | 353.26806 | No results   | No results   | Full match | --         | Lipids and lipid-like molecules         | 0.14913429 | 0.00018338 | 1.611141 | down |
| Com_4051_neg | N2-Methylguanosine                                                     | C11 H15 N5 O5     | 297.10734 | 4.819 | 296.10006 | Full match   | Full match   | Full match | --         | Nucleosides, nucleotides, and analogues | 0.36937747 | 0.00020561 | 1.095185 | down |
| Com_164_pos  | Cuminaldehyde                                                          | C10 H12 O         | 148.08873 | 5.701 | 149.096   | Full match   | No results   | No results | cpd:C06577 | Lipids and lipid-like molecules         | 2.04163676 | 0.00021816 | 1.596563 | up   |
| Com_6184_neg | s7p                                                                    | C7 H15 O10 P      | 290.04079 | 1.288 | 289.03357 | No results   | No results   | Full match | cpd:C05382 | Organic oxygen compounds                | 0.11403829 | 0.00022519 | 1.508268 | down |
| Com_94_pos   | APK                                                                    | C14 H26 N4 O4     | 356.20564 | 5.223 | 357.21293 | Invalid mass | No results   | No results | --         | --                                      | 0.07306097 | 0.00022701 | 1.73451  | down |

|               |                                                                        |                   |           |       |           |              |              |            |            |                                         |            |            |          |      |
|---------------|------------------------------------------------------------------------|-------------------|-----------|-------|-----------|--------------|--------------|------------|------------|-----------------------------------------|------------|------------|----------|------|
| Com_1952_pos  | 5-Methoxyindole-3-Carbaldehyde                                         | C10 H9 N O2       | 175.06321 | 4.769 | 176.07048 | No results   | No results   | Full match | --         | Organoheterocyclic compounds            | 3.18693407 | 0.00023089 | 1.609666 | up   |
| Com_3197_neg  | Cholic acid                                                            | C24 H40 O5        | 408.28828 | 7.151 | 407.28096 | Full match   | Full match   | Full match | cpd:C00695 | Lipids and lipid-like molecules         | 2.87445457 | 0.00023583 | 1.617735 | up   |
| Com_2563_neg  | LPC 18:1                                                               | C26 H52 N O7 P    | 567.35479 | 9.42  | 566.34751 | No results   | Invalid mass | No results | cpd:C04230 | Lipids and lipid-like molecules         | 0.03591135 | 0.00024639 | 1.663698 | down |
| Com_826_pos   | NMK                                                                    | C15 H29 N5 O5 S   | 746.35043 | 5.218 | 374.18249 | Invalid mass | No results   | No results | --         | --                                      | 2.90139617 | 0.00026335 | 1.479877 | up   |
| Com_1832_pos  | PC O-16:0                                                              | C24 H50 N O7 P    | 495.3319  | 9.187 | 496.33916 | No results   | Full match   | Full match | --         | --                                      | 0.05593676 | 0.00026564 | 1.633336 | down |
| Com_9973_pos  | beta-Nicotinamide adenine dinucleotide phosphate                       | C21 H28 N7 O17 P3 | 743.07407 | 1.393 | 372.54431 | No results   | No results   | Full match | cpd:C00006 | Nucleosides, nucleotides, and analogues | 0.20979018 | 0.000322   | 1.39625  | down |
| Com_1449_pos  | 1-[(3S)-3-(1,3-Benzoxazol-2-yl)-1-pyrrolidinyl]-3-methoxy-1-propanone  | C15 H18 N2 O3     | 274.13471 | 5.294 | 275.142   | Invalid mass | No results   | No results | --         | Organoheterocyclic compounds            | 2.37028282 | 0.00033457 | 1.479871 | up   |
| Com_10929_neg | L-Cysteinesulfinic acid                                                | C3 H7 N O4 S      | 153.00903 | 1.361 | 152.00175 | No results   | No results   | Full match | cpd:C00606 | Organic acids and derivatives           | 3.2675709  | 0.0003362  | 1.267528 | up   |
| Com_82_pos    | Isoquinoline                                                           | C9 H7 N           | 129.0578  | 5.864 | 130.06507 | Full match   | No results   | No results | cpd:C06323 | Organoheterocyclic compounds            | 3.00366417 | 0.00036712 | 1.145822 | up   |
| Com_2397_neg  | 1-Methyluric acid                                                      | C6 H6 N4 O3       | 182.04373 | 1.467 | 181.03645 | No results   | No results   | Full match | cpd:C16359 | Organoheterocyclic compounds            | 6.71596717 | 0.00037624 | 1.605481 | up   |
| Com_4157_pos  | gamma-                                                                 | C10 H18 N2 O5 S   | 278.09357 | 4.882 | 279.10085 | No results   | Full match   | No results | --         | Organic acids and derivatives           | 5.70865488 | 0.00038852 | 1.435447 | up   |
| Com_491_neg   | Roquefortine C                                                         | C22 H23 N5 O2     | 389.18045 | 5.188 | 388.17317 | Invalid mass | No results   | No results | --         | Organoheterocyclic compounds            | 0.40439678 | 0.00047734 | 1.596654 | down |
| Com_7417_pos  | Deoxyribose 5-Phosphate                                                | C5 H11 O7 P       | 214.02398 | 1.368 | 237.01321 | No results   | No results   | Full match | --         | --                                      | 3.30890052 | 0.00048252 | 1.444573 | up   |
| Com_496_pos   | 4-Pyridoxic acid                                                       | C8 H9 N O4        | 183.05308 | 4.784 | 184.06036 | No results   | No results   | Full match | cpd:C00847 | Organoheterocyclic compounds            | 3.2726606  | 0.00051726 | 1.100376 | up   |
| Com_909_neg   | Leu-Pro                                                                | C11 H20 N2 O3     | 228.14708 | 5.151 | 227.13981 | No results   | No results   | Full match | --         | Organic acids and derivatives           | 0.21439864 | 0.00062283 | 1.413812 | down |
| Com_6145_pos  | 2-[[[4-phenyl-1H-pyrazol-5-yl]amino]methylene]-1H-indene-1,3(2H)-dione | C19 H13 N3 O2     | 315.10007 | 6.294 | 316.10756 | Full match   | No results   | No results | --         | --                                      | 4.42727382 | 0.00065866 | 1.584471 | up   |
| Com_2887_neg  | LPE 16:2                                                               | C21 H40 N O7 P    | 449.25505 | 8.345 | 448.24777 | No results   | Full match   | No results | --         | Lipids and lipid-like molecules         | 0.37829169 | 0.00066213 | 1.601428 | down |
| Com_206_neg   | Prostaglandin E3                                                       | C20 H30 O5        | 386.18642 | 6.88  | 431.1846  | Invalid mass | No results   | No results | cpd:C06439 | Lipids and lipid-like molecules         | 2.43086882 | 0.00068562 | 1.604354 | up   |
| Com_240_pos   | L-5-Hydroxytryptophan                                                  | C11 H12 N2 O3     | 203.05801 | 3.947 | 221.09184 | Invalid mass | No results   | No results | cpd:C00643 | Organoheterocyclic compounds            | 2.4444218  | 0.00071118 | 1.538852 | up   |
| Com_34_neg    | 2-Hydroxy-1-(4-methoxyphenyl)propyl hexopyranoside                     | C16 H24 O8        | 344.14747 | 5.698 | 343.1402  | Full match   | No results   | No results | --         | --                                      | 2.40441545 | 0.00071465 | 1.624123 | up   |
| Com_4909_neg  | 2-deoxyglucose-6-phosphate                                             | C6 H13 O8 P       | 244.03543 | 1.266 | 289.03369 | No results   | No results   | Full match | --         | Organic acids and derivatives           | 0.10604663 | 0.0007195  | 1.499342 | down |
| Com_1027_pos  | N-(2-hydroxyphenyl)acetamide                                           | C8 H9 N O2        | 173.04354 | 1.464 | 174.05084 | Invalid mass | No results   | No results | --         | --                                      | 4.4580118  | 0.00080103 | 1.486741 | up   |
| Com_11_pos    | LPE 18:1                                                               | C23 H46 N O7 P    | 479.30051 | 9.346 | 480.30781 | No results   | Full match   | Full match | --         | Lipids and lipid-like molecules         | 0.02298234 | 0.00082701 | 1.650453 | down |
| Com_3377_pos  | R-1 Methanandamide                                                     | C23 H40 N O5 P    | 882.52264 | 4.991 | 442.26859 | Invalid mass | No results   | No results | --         | Organic acids and derivatives           | 0.14906603 | 0.00088298 | 1.527628 | down |
| Com_3363_pos  | L-Cysteine-glutathione                                                 | C13 H22 N4 O8 S2  | 426.08761 | 1.381 | 214.05108 | No results   | No results   | Full match | --         | --                                      | 3.98979055 | 0.00091171 | 1.1705   | up   |
| Com_9839_neg  | dCDP                                                                   | C9 H15 N3 O10 P2  | 387.02492 | 1.852 | 386.01764 | No results   | No results   | Full match | cpd:C00705 | Organic oxygen compounds                | 2.02833672 | 0.00102937 | 1.435539 | up   |
| Com_711_neg   | Xanthine                                                               | C5 H4 N4 O2       | 152.03288 | 2.173 | 151.0256  | Full match   | No results   | Full match | cpd:C00385 | Organoheterocyclic compounds            | 0.31544287 | 0.00107063 | 1.496831 | down |
| Com_593_neg   | 1,5-Anhydro-D-glucitol                                                 | C6 H12 O5         | 164.068   | 5.711 | 163.06073 | Full match   | Full match   | Full match | cpd:C07326 | Organic oxygen compounds                | 2.1960835  | 0.00111728 | 1.615816 | up   |
| Com_594_neg   | Dulcitol                                                               | C6 H14 O6         | 182.07863 | 5.715 | 163.06079 | No results   | No results   | Full match | cpd:C01697 | Organic oxygen compounds                | 2.1960835  | 0.00111728 | 1.615816 | up   |
| Com_4431_neg  | 2-(3,4-dimethoxyphenyl)-N-(4-morpholinophenyl)acetamide                | C20 H24 N2 O4     | 356.17571 | 6.88  | 355.16843 | Invalid mass | No results   | No results | --         | --                                      | 2.40288309 | 0.00115001 | 1.5746   | up   |
| Com_4976_pos  | ethyl 2-(benzylamino)-1,3-thiazole-5-carboxylate                       | C13 H14 N2 O2 S   | 262.07397 | 5.609 | 263.0814  | Invalid mass | No results   | No results | --         | --                                      | 3.30172061 | 0.00115101 | 1.495578 | up   |
| Com_1765_pos  | 1-Phenyl-3-methyl-5-pyrazolone                                         | C10 H10 N2 O      | 174.07922 | 3.948 | 175.08648 | Full match   | Full match   | No results | --         | --                                      | 2.46898122 | 0.00119469 | 1.508806 | up   |
| Com_5181_pos  | Adipamide                                                              | C6 H12 N2 O2      | 144.08957 | 1.468 | 145.09683 | No results   | No results   | Full match | --         | Lipids and lipid-like molecules         | 9.17814517 | 0.00121274 | 1.397382 | up   |
| Com_1720_pos  | PC O-18:1                                                              | C26 H52 N O7 P    | 521.34787 | 9.431 | 522.35513 | No results   | Full match   | Full match | --         | --                                      | 0.06321167 | 0.00121964 | 1.54402  | down |
| Com_3674_pos  | 7-(1H-pyrrol-1-yl)-5H-chromeno[2,3-b]pyridin-5-one                     | C16 H10 N2 O2     | 262.07398 | 6.331 | 263.08126 | Full match   | No results   | No results | --         | --                                      | 2.05765012 | 0.00129339 | 1.388391 | up   |

|               |                                                                 |                  |           |        |           |              |              |            |            |                                         |            |            |          |      |
|---------------|-----------------------------------------------------------------|------------------|-----------|--------|-----------|--------------|--------------|------------|------------|-----------------------------------------|------------|------------|----------|------|
| Com_730_pos   | Vitexin                                                         | C21 H20 O10      | 216.05347 | 5.185  | 455.09617 | Invalid mass | No results   | No results | cpd:C01460 | Phenylpropanoids and polyketides        | 2.21074313 | 0.00148095 | 1.447985 | up   |
| Com_7360_pos  | 10-Nitrolinoleate                                               | C18 H31 N O4     | 307.21193 | 7.529  | 308.21921 | Invalid mass | No results   | No results | cpd:C13800 | Lipids and lipid-like molecules         | 3.04466439 | 0.00170402 | 1.519729 | up   |
| Com_5188_pos  | N-butyl-N'-[5-(tert-butyl)-1,3,4-thiadiazol-2-yl]urea           | C11 H20 N4 O S   | 278.11349 | 5.591  | 279.12045 | Invalid mass | No results   | No results | --         | --                                      | 2.09230789 | 0.00180376 | 1.239252 | up   |
| Com_357_neg   | Uridine monophosphate                                           | C9 H13 N2 O9 P   | 324.03636 | 1.457  | 323.02909 | Full match   | Full match   | Full match | cpd:C00105 | Nucleosides, nucleotides, and analogues | 0.21370108 | 0.00188895 | 1.184235 | down |
| Com_8122_neg  | LysoPE 18:0                                                     | C23 H48 N O7 P   | 481.31799 | 9.185  | 480.31071 | No results   | No results   | Full match | --         | Lipids and lipid-like molecules         | 0.11844779 | 0.00190371 | 1.449295 | down |
| Com_1344_neg  | 4-Hydroxy-L-Glutamic                                            | C5 H9 N O5       | 163.04881 | 5.043  | 162.04153 | No results   | No results   | Full match | cpd:C03079 | Organic acids and derivatives           | 2.40166707 | 0.00194336 | 1.353056 | up   |
| Com_677_neg   | Cytidine-5'-monophosphate                                       | C9 H14 N3 O8 P   | 323.0524  | 1.434  | 322.04512 | No results   | Full match   | Full match | cpd:C00055 | Nucleosides, nucleotides, and analogues | 0.10929551 | 0.00204249 | 1.327709 | down |
| Com_2088_pos  | Cytidine 5'-monophosphate (hydrate)                             | C9 H14 N3 O8 P   | 323.0515  | 1.399  | 324.05877 | Full match   | Full match   | Full match | cpd:C00055 | Nucleosides, nucleotides, and analogues | 0.06670999 | 0.00217539 | 1.302144 | down |
| Com_73_neg    | 3,5-                                                            | C8 H9 N O4       | 183.05284 | 5.249  | 182.04556 | Full match   | No results   | Full match | --         | Organic acids and derivatives           | 2.36832451 | 0.00221331 | 1.138227 | up   |
| Com_1972_neg  | LPE 8:0                                                         | C13 H28 N O7 P   | 341.16082 | 6.011  | 340.15354 | No results   | Full match   | No results | --         | Lipids and lipid-like molecules         | 0.48996595 | 0.0022685  | 1.165286 | down |
| Com_8594_neg  | Morphine-3-glucuronide                                          | C23 H27 N O9     | 461.16877 | 6.446  | 460.16149 | Full match   | No results   | No results | cpd:C16643 | Alkaloids and derivatives               | 0.35220207 | 0.00239029 | 1.483808 | down |
| Com_138_neg   | Fumaric acid                                                    | C4 H4 O4         | 116.01017 | 2.364  | 115.00288 | No results   | Invalid mass | No results | cpd:C00122 | Organic acids and derivatives           | 2.17833062 | 0.00252213 | 1.283108 | up   |
| Com_4447_pos  | 2-[4-(tert-butyl)-2-chlorophenoxy]-3-nitropyridine              | C15 H15 Cl N2 O3 | 306.08076 | 1.366  | 307.08804 | Invalid mass | No results   | No results | --         | --                                      | 14.1968452 | 0.00261307 | 1.563319 | up   |
| Com_3305_pos  | Uridine 5'-monophosphate                                        | C9 H13 N2 O9 P   | 324.03542 | 1.422  | 325.04267 | No results   | Full match   | Full match | cpd:C00105 | Nucleosides, nucleotides, and analogues | 0.16134126 | 0.00272515 | 1.180921 | down |
| Com_9142_neg  | Glycoursodeoxycholic acid                                       | C26 H43 N O5     | 449.31492 | 7.128  | 448.30764 | Full match   | No results   | Full match | --         | Lipids and lipid-like molecules         | 4.29199771 | 0.00275555 | 1.341225 | up   |
| Com_2749_pos  | Radicinin                                                       | C12 H12 O5       | 236.07045 | 5.72   | 473.14819 | Invalid mass | No results   | No results | --         | Organic oxygen compounds                | 3.16157606 | 0.00278434 | 1.232181 | up   |
| Com_53_neg    | N-Acetyl-D-alloisoleucine                                       | C8 H15 N O3      | 173.1047  | 5.56   | 172.09742 | Full match   | Full match   | Full match | --         | Organic acids and derivatives           | 2.07692768 | 0.0029209  | 1.297916 | up   |
| Com_4281_pos  | 2-[[[4,5-dimethoxy-2-nitrophenethyl]imino]methyl]phenol         | C17 H18 N2 O5    | 330.1218  | 6.898  | 331.12908 | Full match   | No results   | No results | --         | --                                      | 2.46954374 | 0.00309212 | 1.500325 | up   |
| Com_3591_neg  | Prostaglandin G2                                                | C20 H32 O6       | 368.22014 | 5.853  | 367.21286 | No results   | No results   | Full match | cpd:C05956 | Lipids and lipid-like molecules         | 0.26486531 | 0.00322345 | 1.199121 | down |
| Com_4841_pos  | 2-phenyl-2,4,6,7-tetrahydrothiino[4,3-c]pyrazol-3-ol            | C12 H12 N2 O S   | 232.06809 | 5.75   | 233.0758  | Full match   | No results   | No results | --         | --                                      | 2.15157378 | 0.00327041 | 1.381451 | up   |
| Com_14668_neg | Nicotinic Acid                                                  | C8 H8 N2 O3      | 180.0531  | 10.247 | 179.04582 | No results   | No results   | Full match | cpd:C05380 | Organic acids and derivatives           | 2.21974929 | 0.00348275 | 1.033273 | up   |
| Com_184_pos   | Methyl indole-3-acetate                                         | C11 H11 N O2     | 189.07869 | 5.131  | 190.08596 | Full match   | Full match   | Full match | cpd:C20635 | Organoheterocyclic compounds            | 2.58729808 | 0.00373648 | 1.462961 | up   |
| Com_95_neg    | Perillic acid                                                   | C10 H14 O2       | 166.09891 | 6.151  | 165.09162 | Full match   | No results   | Full match | cpd:C11924 | Lipids and lipid-like molecules         | 0.20716575 | 0.00375058 | 1.118692 | down |
| Com_2946_neg  | 3-(1-pyrrolidinyl)-5-(trifluoromethyl)pyridine-2-carbothioamide | C11 H12 F3 N3 S  | 278.10913 | 6.698  | 277.10186 | Invalid mass | No results   | No results | --         | --                                      | 0.20394933 | 0.00394829 | 1.499422 | down |
| Com_12510_neg | 8,15-Dihete                                                     | C20 H32 O4       | 336.23058 | 6.632  | 335.22331 | No results   | No results   | Full match | --         | --                                      | 0.38809279 | 0.00413518 | 1.08282  | down |
| Com_8274_pos  | 6-phenyl-1,2,3,4-tetrahydro-2,5-                                | C16 H14 N2 O     | 232.09981 | 6.216  | 233.10708 | Invalid mass | No results   | No results | --         | --                                      | 2.26580906 | 0.00422351 | 1.349932 | up   |
| Com_5028_neg  | Guanosine-3',5'-cyclic monophosphate                            | C10 H12 N5 O7 P  | 345.0479  | 2.439  | 344.04062 | No results   | Full match   | Full match | cpd:C00942 | Nucleosides, nucleotides, and analogues | 0.22786393 | 0.00443759 | 1.183266 | down |
| Com_630_pos   | LPE 16:0                                                        | C21 H44 N O7 P   | 453.28512 | 9.107  | 454.29236 | No results   | Full match   | Full match | --         | Lipids and lipid-like molecules         | 0.09649968 | 0.00463734 | 1.249134 | down |
| Com_659_pos   | Kanosamine                                                      | C6 H13 N O5      | 179.08059 | 4.841  | 180.08786 | Invalid mass | No results   | No results | cpd:C12212 | Organic oxygen compounds                | 9.28622579 | 0.00473564 | 1.326366 | up   |
| Com_2739_pos  | EPK                                                             | C16 H28 N4 O6    | 372.20045 | 5.307  | 373.20772 | Full match   | No results   | No results | --         | --                                      | 0.09196003 | 0.00476041 | 1.332525 | down |
| Com_7643_neg  | Fmoc-L-Isoleucine                                               | C21 H23 N O4     | 353.16397 | 6.304  | 352.1567  | No results   | No results   | Full match | --         | Organic acids and derivatives           | 6.33697439 | 0.00521279 | 1.434141 | up   |
| Com_6599_neg  | Glycocholic acid                                                | C26 H43 N O6     | 465.30971 | 6.655  | 464.30243 | Full match   | No results   | Full match | cpd:C01921 | Lipids and lipid-like molecules         | 3.648299   | 0.00524548 | 1.330487 | up   |
| Com_502_pos   | 3-(4-nitrophenyl)[1,2,3]triazolo[1,5-a]quinazolin-5-amine       | C15 H10 N6 O2    | 306.08233 | 5.988  | 307.08961 | Invalid mass | No results   | No results | --         | --                                      | 3.03573738 | 0.0054293  | 1.358659 | up   |
| Com_652_neg   | LPE 18:2                                                        | C23 H44 N O7 P   | 477.28629 | 9.059  | 476.27901 | No results   | Full match   | Full match | --         | Lipids and lipid-like molecules         | 0.08681814 | 0.00549636 | 1.403278 | down |
| Com_19_neg    | LPG 18:1                                                        | C24 H47 O9 P     | 510.29631 | 9.734  | 509.28903 | No results   | Full match   | Full match | --         | Lipids and lipid-like molecules         | 0.01985627 | 0.00596528 | 1.481316 | down |
| Com_5269_pos  | Pyridoxamine                                                    | C8 H12 N2 O2     | 168.08995 | 5.94   | 207.05315 | No results   | No results   | Full match | cpd:C00534 | Organoheterocyclic compounds            | 2.57997964 | 0.0064355  | 1.02803  | up   |
| Com_9307_neg  | LPG 16:2                                                        | C22 H41 O9 P     | 480.24989 | 8.208  | 479.24261 | No results   | Full match   | No results | --         | Lipids and lipid-like molecules         | 0.37057203 | 0.00687889 | 1.294349 | down |

|               |                                                    |                   |           |        |           |              |              |            |            |                                         |            |            |          |      |
|---------------|----------------------------------------------------|-------------------|-----------|--------|-----------|--------------|--------------|------------|------------|-----------------------------------------|------------|------------|----------|------|
| Com_9375_neg  | Cystine                                            | C6 H12 N2 O4 S2   | 240.02394 | 1.252  | 239.01666 | No results   | No results   | Full match | cpd:C01420 | Organic acids and derivatives           | 3.12183846 | 0.00715345 | 1.264181 | up   |
| Com_2126_neg  | Lysope 18:1                                        | C23 H46 N O7 P    | 479.30205 | 9.754  | 478.29477 | No results   | No results   | Full match | --         | Lipids and lipid-like molecules         | 0.0734734  | 0.00739252 | 1.435946 | down |
| Com_1151_pos  | Oleoyl ethanolamide                                | C20 H39 N O2      | 307.28682 | 9.347  | 308.2941  | Invalid mass | No results   | No results | cpd:C20792 | Organic nitrogen compounds              | 0.05628138 | 0.00842634 | 1.391984 | down |
| Com_2184_pos  | Epigallocatechin                                   | C15 H14 O7        | 612.15163 | 2.382  | 307.08309 | No results   | Invalid mass | No match   | cpd:C12136 | Phenylpropanoids and polyketides        | 4.02835457 | 0.00852208 | 1.219451 | up   |
| Com_259_pos   | 1H-indol-3-yl(pyridin-2-yl)methanol                | C14 H12 N2 O      | 246.07907 | 5.582  | 247.08634 | Invalid mass | No results   | No results | --         | --                                      | 2.22288446 | 0.00886183 | 1.365043 | up   |
| Com_4204_neg  | LPE 13:0                                           | C18 H38 N O7 P    | 411.2392  | 7.565  | 410.23192 | No results   | Full match   | Full match | --         | Lipids and lipid-like molecules         | 2.76391785 | 0.0089686  | 1.247192 | up   |
| Com_8441_pos  | Stearoyl Ethanolamide                              | C20 H41 N O2      | 327.3131  | 7.082  | 328.32037 | Full match   | No results   | No results | --         | Organic nitrogen compounds              | 2.57645022 | 0.00898503 | 1.333689 | up   |
| Com_7529_pos  | L-Cystine                                          | C6 H12 N2 O4 S2   | 240.02364 | 1.218  | 241.03092 | Full match   | Full match   | Full match | cpd:C00491 | Organic acids and derivatives           | 2.50021007 | 0.0093063  | 1.179362 | up   |
| Com_3163_pos  | Asp-Phe                                            | C13 H16 N2 O5     | 280.10473 | 5.435  | 263.10138 | No results   | No results   | Full match | --         | Organic acids and derivatives           | 0.43415879 | 0.01197657 | 1.344832 | down |
| Com_397_neg   | Syringic acid                                      | C9 H10 O5         | 198.05249 | 4.951  | 179.03464 | No results   | No results   | Full match | cpd:C10833 | Benzenoids                              | 0.45364264 | 0.01227217 | 1.171745 | down |
| Com_9324_pos  | RMH                                                | C17 H30 N8 O4 S   | 482.21327 | 5.955  | 465.2099  | Invalid mass | No results   | No results | --         | --                                      | 3.2554784  | 0.01386934 | 1.185122 | up   |
| Com_57_neg    | Indole-3-lactic acid                               | C11 H11 N O3      | 205.07374 | 5.536  | 204.06646 | Full match   | Full match   | Full match | cpd:C02043 | Organoheterocyclic compounds            | 0.22863047 | 0.0159924  | 1.072153 | down |
| Com_299_neg   | Pimelic acid                                       | C7 H12 O4         | 160.07301 | 5.387  | 159.06574 | Full match   | Full match   | Full match | cpd:C02656 | Lipids and lipid-like molecules         | 2.79996245 | 0.01642731 | 1.20647  | up   |
| Com_439_pos   | Indole-3-propionic acid                            | C11 H11 N O2      | 189.07785 | 5.155  | 190.08513 | No results   | Invalid mass | No results | --         | Organoheterocyclic compounds            | 2.16320727 | 0.01701736 | 1.273199 | up   |
| Com_9603_neg  | LPG O-13:1                                         | C19 H39 O8 P      | 426.23918 | 7.077  | 425.2319  | No results   | Full match   | No results | --         | --                                      | 4.41366533 | 0.01764389 | 1.268396 | up   |
| Com_11335_neg | Prostaglandin B2                                   | C20 H30 O4        | 334.21284 | 7.057  | 333.20597 | No results   | No results   | Full match | cpd:C05954 | Lipids and lipid-like molecules         | 2.3050742  | 0.01834798 | 1.158599 | up   |
| Com_2708_neg  | LPG 18:2                                           | C24 H45 O9 P      | 508.28087 | 8.966  | 507.2736  | No results   | Full match   | No results | --         | Lipids and lipid-like molecules         | 0.09782554 | 0.01884808 | 1.220949 | down |
| Com_13022_neg | Biopterin                                          | C9 H11 N5 O3      | 237.08502 | 1.431  | 236.07774 | No results   | No results   | Full match | cpd:C06313 | Organoheterocyclic compounds            | 0.20145396 | 0.02029819 | 1.235795 | down |
| Com_1769_neg  | Royal jelly acid                                   | C10 H18 O3        | 186.12575 | 5.669  | 231.12396 | No results   | No results   | Full match | --         | Organic acids and derivatives           | 3.77385113 | 0.02071738 | 1.101698 | up   |
| Com_9009_pos  | S-(Methyl)Glutathione                              | C11 H19 N3 O6 S   | 321.09935 | 2.412  | 322.10662 | No results   | No results   | Full match | --         | Organic acids and derivatives           | 2.04109836 | 0.02090532 | 1.196271 | up   |
| Com_1326_neg  | Adenosine diphosphate                              | C15 H23 N5 O14 P2 | 559.07302 | 1.425  | 558.06571 | Full match   | No results   | Full match | cpd:C00301 | Nucleosides, nucleotides, and analogues | 2.49928452 | 0.02233471 | 1.08623  | up   |
| Com_7711_pos  | L-Methionine Methyl Ester                          | C6 H13 N O2 S     | 163.0665  | 2.094  | 164.07377 | No results   | No results   | Full match | --         | --                                      | 6.59253111 | 0.02293794 | 1.169866 | up   |
| Com_6210_neg  | Elaidic acid                                       | C18 H34 O2        | 282.25606 | 10.286 | 281.24878 | Full match   | No results   | No results | cpd:C01712 | Lipids and lipid-like molecules         | 0.30294083 | 0.02650063 | 1.231615 | down |
| Com_6457_pos  | N1-cyclooctyl-4-hydroxy-1-piperidinecarbothioamide | C14 H26 N2 O S    | 292.15694 | 6.101  | 293.16421 | Invalid mass | No results   | No results | --         | --                                      | 4.4945157  | 0.02686286 | 1.069863 | up   |
| Com_500_pos   | Lysopg 18:1                                        | C24 H47 O9 P      | 510.29557 | 9.74   | 533.28482 | No results   | No results   | Full match | --         | Lipids and lipid-like molecules         | 0.03256733 | 0.02805345 | 1.22331  | down |
| Com_3578_neg  | LPE 18:0                                           | C23 H48 N O7 P    | 481.31785 | 10.22  | 480.31057 | No results   | Full match   | Full match | --         | Lipids and lipid-like molecules         | 0.07398494 | 0.03325163 | 1.199306 | down |
| Com_4673_pos  | LPC 16:0-SN1                                       | C24 H50 N O7 P    | 495.33188 | 9.425  | 496.33915 | No results   | Full match   | Full match | --         | --                                      | 0.25918159 | 0.03492747 | 1.19356  | down |
| Com_700_pos   | Trityl alcohol                                     | C24 H29 N3 O      | 357.22011 | 5.991  | 358.22739 | Invalid mass | No results   | No results | --         | Benzenoids                              | 3.35128565 | 0.03493231 | 1.139374 | up   |
| Com_982_pos   | N1-[6-(2-fluorophenoxy)-3-pyridyl]-2-              | C15 H13 F N2 O2   | 272.09458 | 5.937  | 273.1018  | Invalid mass | No results   | No results | --         | --                                      | 2.51925237 | 0.04106935 | 1.147309 | up   |
| Com_822_neg   | Oleoyl-L- $\alpha$ -                               | C21 H41 O7 P      | 436.25958 | 10.099 | 435.2523  | Full match   | Full match   | No results | --         | Lipids and lipid-like molecules         | 0.02391071 | 0.04316279 | 1.171293 | down |
| Com_9089_neg  | LPE 20:4                                           | C25 H44 N O7 P    | 501.28674 | 8.704  | 500.27946 | No results   | Full match   | No results | --         | Lipids and lipid-like molecules         | 0.19823519 | 0.04441938 | 1.112752 | down |
| Com_4470_pos  | Artemisin                                          | C15 H22 O5        | 282.14397 | 6.017  | 283.15123 | Invalid mass | No results   | No results | cpd:C09538 | Lipids and lipid-like molecules         | 2.07610779 | 0.04553945 | 1.085053 | up   |
| Com_4270_pos  | 8-Isoprostaglandin F1 $\beta$                      | C20 H36 O5        | 373.28242 | 6.501  | 374.2897  | Invalid mass | No results   | No results | --         | Lipids and lipid-like molecules         | 2.68217733 | 0.04744619 | 1.000216 | up   |

Table S8: DEMs in XDR vs. MDR strains.

| Compound ID  | Name                                                                 | Formula         | Molecular Weight | RT [min] | m/z       | mzCloud Results | mzVault Results | MassList Results | KEGG ID    | ClassyFire functional classification    | FC XDR/MDR | P-value XDR/MDR | VIP     | Regulate |
|--------------|----------------------------------------------------------------------|-----------------|------------------|----------|-----------|-----------------|-----------------|------------------|------------|-----------------------------------------|------------|-----------------|---------|----------|
| Com_1787_pos | Enrofloxacin                                                         | C19 H22 F N3 O3 | 381.14639        | 6.255    | 382.1537  | Invalid mass    | No results      | No results       | --         | Organoheterocyclic compounds            | 0.01813495 | 5.2836E-16      | 2.01951 | down     |
| Com_3_neg    | 2-Hydroxycaproic acid                                                | C6 H12 O3       | 132.07784        | 5.592    | 131.07055 | Invalid mass    | Invalid mass    | No results       | --         | Lipids and lipid-like molecules         | 0.01611625 | 5.5479E-13      | 1.72836 | down     |
| Com_205_pos  | 2-(1,3-dimethyl-1H-pyrazol-5-yl)-1H-isoindole-1,3(2H)-dione          | C13 H11 N3 O2   | 241.0849         | 5.474    | 242.09217 | Full match      | No results      | No results       | --         | --                                      | 0.09784852 | 9.9133E-13      | 1.70495 | down     |
| Com_2481_neg | L-Homocystine                                                        | C8 H16 N2 O4 S2 | 268.05382        | 5.638    | 267.04655 | No results      | No results      | Full match       | cpd:C01817 | Organic acids and derivatives           | 0.11168941 | 9.9674E-13      | 1.64672 | down     |
| Com_212_neg  | Phenylacetaldehyde                                                   | C8 H8 O         | 120.0569         | 5.602    | 119.04941 | Invalid mass    | No results      | No results       | cpd:C00601 | Benzenoids                              | 0.07725626 | 8.3479E-12      | 1.79887 | down     |
| Com_5036_neg | Tyrosylalanine                                                       | C12 H16 N2 O4   | 252.11124        | 5.021    | 251.10394 | Full match      | No results      | No results       | --         | Organic acids and derivatives           | 0.12119203 | 8.5109E-11      | 1.60507 | down     |
| Com_6163_pos | 6-(Dimethylamino)purine                                              | C7 H9 N5        | 163.08578        | 5.16     | 164.09266 | No results      | No results      | Full match       | --         | Organoheterocyclic compounds            | 0.11504954 | 9.3636E-11      | 1.97935 | down     |
| Com_119_neg  | 2-Hydroxyvaleric acid                                                | C5 H10 O3       | 118.0622         | 5.255    | 117.05492 | Invalid mass    | Invalid mass    | No results       | --         | Lipids and lipid-like molecules         | 0.02056054 | 2.2077E-10      | 1.70342 | down     |
| Com_155_neg  | Mycophenolic acid                                                    | C17 H20 O6      | 320.12368        | 5.598    | 319.1164  | Invalid mass    | No results      | No results       | cpd:C20380 | Organoheterocyclic compounds            | 0.0021008  | 3.6167E-10      | 1.75558 | down     |
| Com_848_neg  | o-Toluic Acid                                                        | C8 H8 O2        | 136.05199        | 5.157    | 135.04444 | No results      | No results      | Full match       | cpd:C07215 | --                                      | 0.19220074 | 5.9613E-10      | 1.88164 | down     |
| Com_4063_neg | Estrone                                                              | C18 H22 O2      | 540.32908        | 5.477    | 539.32177 | Invalid mass    | No results      | No results       | cpd:C00468 | Lipids and lipid-like molecules         | 0.09816108 | 9.3659E-10      | 1.85046 | down     |
| Com_2287_pos | (3R)-8-hydroxy-3-(4-hydroxyphenyl)-3,4-dihydro-1H-2-benzopyran-1-one | C15 H12 O4      | 128.03542        | 5.181    | 257.078   | Invalid mass    | No results      | No results       | --         | --                                      | 3.58952048 | 1.6851E-09      | 1.45947 | up       |
| Com_2286_pos | 4-phenyl-6-(2-thienyl)-2,3,4,5-tetrahydropyridazin-3-one             | C14 H12 N2 O S  | 256.07069        | 5.177    | 257.07796 | Invalid mass    | No results      | No results       | --         | --                                      | 3.59634912 | 1.8962E-09      | 1.46109 | up       |
| Com_3886_neg | 2-Hydroxyestradiol                                                   | C18 H24 O3      | 288.16888        | 5.511    | 287.1616  | Invalid mass    | No results      | No results       | cpd:C05301 | Lipids and lipid-like molecules         | 0.13438836 | 2.2276E-09      | 1.82577 | down     |
| Com_281_neg  | Xanthosine                                                           | C10 H12 N4 O6   | 284.07586        | 4.751    | 283.06859 | Full match      | Full match      | Full match       | cpd:C01762 | Nucleosides, nucleotides, and analogues | 0.02084134 | 2.5449E-09      | 1.65279 | down     |
| Com_4269_pos | Stanozolol                                                           | C21 H32 N2 O    | 328.24687        | 6.108    | 329.25415 | Invalid mass    | No results      | No results       | cpd:C07311 | Lipids and lipid-like molecules         | 0.06879534 | 3.7387E-09      | 1.85018 | down     |
| Com_5002_neg | Pseudouridine                                                        | C9 H12 N2 O6    | 244.0696         | 2.027    | 243.06232 | Full match      | No results      | Full match       | cpd:C02067 | Nucleosides, nucleotides, and analogues | 5.55761512 | 4.5952E-09      | 1.95523 | up       |
| Com_6128_pos | LysoPE 18:2                                                          | C23 H44 N O7 P  | 477.28537        | 7.481    | 478.29264 | No results      | No results      | Full match       | --         | --                                      | 0.22887014 | 6.6151E-09      | 1.5212  | down     |
| Com_743_neg  | Gamma-Glu-Leu                                                        | C11 H20 N2 O5   | 260.13743        | 5.445    | 259.13015 | No results      | No results      | Full match       | --         | Organic acids and derivatives           | 0.43205883 | 6.9946E-09      | 1.8704  | down     |
| Com_1697_neg | 2-Methylbutyroylcarnitine                                            | C12 H23 N O4    | 245.16283        | 6.152    | 244.15556 | No results      | No results      | Full match       | --         | Lipids and lipid-like molecules         | 0.03727195 | 8.1402E-09      | 1.89294 | down     |
| Com_543_pos  | indoline-2-carboxylic acid                                           | C9 H9 N O2      | 163.06324        | 5.3      | 164.07055 | Full match      | No results      | Full match       | --         | --                                      | 6.71902998 | 8.3372E-09      | 1.86614 | up       |
| Com_284_neg  | 2-Hydroxy-4-methylthiobutanoic acid                                  | C5 H10 O3 S     | 150.03448        | 5.202    | 149.02721 | Full match      | No results      | No results       | --         | Lipids and lipid-like molecules         | 0.00484736 | 8.5319E-09      | 1.79438 | down     |
| Com_9_neg    | 3-Phenyllactic acid                                                  | C9 H10 O3       | 166.06238        | 5.599    | 165.0551  | Full match      | Full match      | Full match       | cpd:C01479 | Phenylpropanoids and polyketides        | 0.05281641 | 1.7661E-08      | 1.81013 | down     |
| Com_7662_pos | JNJ-1661010                                                          | C19 H19 N5 O S  | 365.13202        | 4.599    | 366.13929 | No results      | No results      | Full match       | --         | Organoheterocyclic compounds            | 0.06227275 | 1.9328E-08      | 1.89937 | down     |
| Com_562_pos  | 3-((5-Phenylloxazol-2-yl)amino)benzotrile                            | C16 H11 N3 O    | 261.08989        | 5.916    | 262.09717 | Full match      | No results      | No results       | --         | Organoheterocyclic compounds            | 0.28156104 | 2.1333E-08      | 1.48422 | down     |
| Com_5106_pos | 2'-O-Methyladenosine                                                 | C11 H15 N5 O4   | 264.08522        | 4.891    | 282.11941 | Invalid mass    | Invalid mass    | No results       | --         | Nucleosides, nucleotides, and analogues | 0.08651871 | 2.1429E-08      | 1.82763 | down     |
| Com_8621_pos | Proscillaridin                                                       | C30 H42 O8      | 530.29522        | 6.33     | 531.3025  | Invalid mass    | No results      | No results       | --         | Lipids and lipid-like molecules         | 0.14552106 | 3.2341E-08      | 1.79863 | down     |
| Com_208_neg  | Pantetheine                                                          | C11 H22 N2 O4 S | 278.13032        | 5.27     | 277.12299 | No results      | No results      | Full match       | cpd:C00831 | Organic acids and derivatives           | 3.43766947 | 5.8563E-08      | 1.35874 | up       |
| Com_7478_pos | 2-OHE1-6-N3Ade                                                       | C23 H25 N5 O3   | 419.20378        | 4.976    | 420.21106 | Invalid mass    | No results      | No results       | --         | --                                      | 4.55989588 | 6.2814E-08      | 1.76861 | up       |
| Com_2170_neg | LPE 18:3                                                             | C23 H42 N O7 P  | 475.27059        | 8.221    | 474.26332 | No results      | Full match      | No results       | --         | Lipids and lipid-like molecules         | 0.15997617 | 7.6816E-08      | 1.43449 | down     |
| Com_614_pos  | 2-[2-(2-pyridyloxy)ethoxy]pyridine                                   | C12 H12 N2 O2   | 198.07917        | 5.515    | 199.08645 | Invalid mass    | No results      | No results       | --         | --                                      | 0.45387797 | 8.9112E-08      | 1.90382 | down     |
| Com_613_pos  | N-(1-methyl-3-phenyl-1H-pyrazol-5-yl)-N'-(2-thienyl)urea             | C15 H14 N4 O S  | 298.09269        | 5.486    | 299.09997 | Invalid mass    | No results      | No results       | --         | --                                      | 2.61426781 | 9.772E-08       | 1.43407 | up       |
| Com_4532_neg | Lauric acid ethyl ester                                              | C14 H28 O2      | 228.2088         | 8.167    | 227.20152 | Full match      | No results      | Full match       | --         | Lipids and lipid-like molecules         | 0.14843458 | 1.1218E-07      | 1.91324 | down     |
| Com_6551_pos | MAG (18:3)                                                           | C21 H36 O4      | 352.26078        | 7.269    | 353.26806 | No results      | No results      | Full match       | --         | Lipids and lipid-like molecules         | 0.19210664 | 1.2979E-07      | 1.57904 | down     |
| Com_165_neg  | trans-Cinnamic acid                                                  | C9 H8 O2        | 148.05177        | 5.603    | 147.0445  | Full match      | Full match      | No results       | cpd:C00423 | Phenylpropanoids and polyketides        | 0.06121641 | 1.3765E-07      | 1.79558 | down     |

|               |                                                                                               |                 |           |       |           |              |              |            |            |                                         |            |            |         |      |
|---------------|-----------------------------------------------------------------------------------------------|-----------------|-----------|-------|-----------|--------------|--------------|------------|------------|-----------------------------------------|------------|------------|---------|------|
| Com_318_neg   | Boc-beta-cyano-L-alanine 2-[(3S)-1-(Benzylsulfonyl)-3-pyrrolidinyl]-1-methyl-1H-benzimidazole | C9 H14 N2 O4    | 214.0957  | 5.327 | 427.18413 | No results   | No results   | Full match | --         | Organic acids and derivatives           | 3.26523051 | 1.6245E-07 | 1.78827 | up   |
| Com_1773_pos  | N-Acetyl-D-tryptophan                                                                         | C19 H21 N3 O2 S | 377.11998 | 5.001 | 378.12726 | Invalid mass | No results   | No results | --         | Organoheterocyclic compounds            | 4.02218441 | 1.7534E-07 | 1.94075 | up   |
| Com_188_neg   | 5'-S-Methyl-5'-thioadenosine                                                                  | C13 H14 N2 O3   | 246.10091 | 5.128 | 291.09912 | No results   | No results   | Full match | cpd:C03137 | Organic acids and derivatives           | 3.70043301 | 2.0311E-07 | 1.52308 | up   |
| Com_69_pos    | PC O-16:1                                                                                     | C11 H15 N5 O3 S | 297.08939 | 5.126 | 298.09667 | Full match   | Full match   | Full match | cpd:C00170 | Nucleosides, nucleotides, and analogues | 4.46109181 | 2.2032E-07 | 1.72666 | up   |
| Com_1685_pos  | N-Acetylvaline                                                                                | C7 H13 N O3     | 159.08905 | 5.278 | 158.08177 | No results   | No results   | Full match | --         | --                                      | 0.15335158 | 2.3297E-07 | 1.22011 | down |
| Com_1700_neg  | Prostaglandin A2                                                                              | C20 H30 O4      | 370.18568 | 5.385 | 369.1784  | Invalid mass | No results   | No results | cpd:C05953 | Organic acids and derivatives           | 0.2354735  | 2.8766E-07 | 1.54495 | down |
| Com_976_neg   | LPE 17:1                                                                                      | C22 H44 N O7 P  | 465.28514 | 8.991 | 466.29242 | No results   | Full match   | No results | --         | Lipids and lipid-like molecules         | 3.64484071 | 3.1912E-07 | 1.70167 | up   |
| Com_1796_pos  | Glutathione                                                                                   | C10 H17 N3 O6 S | 307.08426 | 5.533 | 306.07699 | No results   | No results   | Full match | cpd:C00051 | Lipids and lipid-like molecules         | 0.0992861  | 3.9261E-07 | 1.55853 | down |
| Com_2043_neg  | LPC 16:1                                                                                      | C24 H48 N O7 P  | 539.32316 | 8.471 | 538.31589 | No results   | Invalid mass | No results | cpd:C04230 | Organic acids and derivatives           | 0.39403439 | 4.0735E-07 | 1.94144 | down |
| Com_1424_neg  | DL-4-Hydroxyphenyllactic acid                                                                 | C9 H10 O4       | 182.05753 | 5.158 | 181.05026 | Full match   | No results   | Full match | --         | Lipids and lipid-like molecules         | 0.19915286 | 4.0902E-07 | 1.19363 | down |
| Com_35_neg    | 2'-Deoxyinosine                                                                               | C10 H12 N4 O4   | 252.08587 | 4.055 | 251.07859 | Full match   | Full match   | Full match | cpd:C05512 | Phenylpropanoids and polyketides        | 0.16433436 | 4.8371E-07 | 1.93227 | down |
| Com_1334_neg  | Obscuroliide A1                                                                               | C15 H17 N O5    | 323.13799 | 5.049 | 324.14519 | Invalid mass | No results   | No results | --         | Nucleosides, nucleotides, and analogues | 0.33053217 | 5.6245E-07 | 1.29614 | down |
| Com_1348_pos  | Capric acid                                                                                   | C10 H20 O2      | 172.14601 | 5.855 | 195.13514 | No results   | No results   | Full match | cpd:C01571 | Benzenoids                              | 0.35770559 | 6.3404E-07 | 1.65033 | down |
| Com_2819_pos  | P-Aminohippuric Acid                                                                          | C9 H10 N2 O3    | 194.06887 | 4.966 | 406.17123 | No results   | No results   | Full match | --         | Lipids and lipid-like molecules         | 0.12548467 | 6.4956E-07 | 1.98016 | down |
| Com_10641_pos | 2,3,4-Trihydroxybenzoic acid                                                                  | C7 H6 O5        | 170.02136 | 5.196 | 171.02863 | No results   | No results   | Full match | --         | Benzenoids                              | 0.18059347 | 7.2204E-07 | 1.78305 | down |
| Com_5665_pos  | Prostaglandin E3                                                                              | C20 H30 O5      | 386.18642 | 6.88  | 431.1846  | Invalid mass | No results   | No results | cpd:C06439 | Phenylpropanoids and polyketides        | 0.13835082 | 7.3435E-07 | 1.78978 | down |
| Com_206_neg   | 17-AAG                                                                                        | C31 H43 N3 O8   | 567.29161 | 5.562 | 566.28431 | Invalid mass | No results   | No results | --         | Lipids and lipid-like molecules         | 2.02430156 | 7.7242E-07 | 1.32727 | up   |
| Com_13_neg    | LPE 14:0                                                                                      | C19 H40 N O7 P  | 425.25379 | 8.172 | 426.26104 | No results   | Full match   | Full match | --         | --                                      | 2.02430156 | 7.7242E-07 | 1.32727 | up   |
| Com_1574_pos  | 2-Thio-acetyl MAGE                                                                            | C21 H42 O3 S    | 356.27785 | 6.606 | 357.28513 | Invalid mass | No results   | No results | --         | Lipids and lipid-like molecules         | 0.11665739 | 1.2012E-06 | 1.93118 | down |
| Com_5311_pos  | D-Fructose 6-phosphate                                                                        | C6 H13 O9 P     | 260.02863 | 5.491 | 261.03592 | No results   | No results   | Full match | cpd:C00085 | Organic acids and derivatives           | 0.26495347 | 1.2808E-06 | 1.60537 | down |
| Com_3902_pos  | Physostigmine                                                                                 | C15 H21 N3 O2   | 275.16312 | 4.987 | 276.17037 | Full match   | No results   | No results | cpd:C06535 | --                                      | 0.162317   | 1.2859E-06 | 1.78104 | down |
| Com_1353_pos  | p-Mentha-1,3,8-triene                                                                         | C10 H14         | 134.10929 | 5.785 | 135.1166  | No results   | No results   | Full match | --         | Organoheterocyclic compounds            | 0.41533641 | 1.2978E-06 | 1.6296  | down |
| Com_5621_pos  | LPE 18:4                                                                                      | C23 H40 N O7 P  | 473.25482 | 7.961 | 472.24754 | No results   | Full match   | No results | --         | Lipids and lipid-like molecules         | 0.38111432 | 1.4258E-06 | 1.87631 | down |
| Com_4900_neg  | Glu-Glu                                                                                       | C10 H16 N2 O7   | 276.09627 | 1.446 | 275.08899 | No results   | No results   | Full match | cpd:C01425 | Lipids and lipid-like molecules         | 16.0069497 | 1.8097E-06 | 1.94282 | up   |
| Com_7352_neg  | Guanosine                                                                                     | C10 H13 N5 O5   | 283.09192 | 3.682 | 282.08463 | Full match   | Full match   | Full match | cpd:C00387 | Organic acids and derivatives           | 3.62578431 | 1.954E-06  | 1.62228 | up   |
| Com_1037_neg  | PE 9:0_9:0                                                                                    | C23 H46 N O8 P  | 495.29606 | 7.705 | 496.30328 | No results   | Full match   | No results | --         | Nucleosides, nucleotides, and analogues | 0.05766831 | 1.9828E-06 | 1.91384 | down |
| Com_2791_pos  | 4-ethoxy-7,9-dimethylpyrido[3',2':4,5]thieno[3,2-d]pyrimidine                                 | C13 H13 N3 O S  | 259.08178 | 5.624 | 260.08906 | Invalid mass | No results   | No results | --         | --                                      | 0.1988358  | 2.3056E-06 | 1.49073 | down |
| Com_1556_pos  | N6-Isopentenyladenosine                                                                       | C15 H21 N5 O4   | 335.15882 | 5.736 | 336.16609 | No results   | Full match   | No results | cpd:C16427 | --                                      | 0.31999697 | 2.6088E-06 | 1.45543 | down |
| Com_1915_pos  | Desthiobiotin                                                                                 | C10 H18 N2 O3   | 214.13148 | 3.746 | 215.13875 | Full match   | No results   | No results | cpd:C01909 | Nucleosides, nucleotides, and analogues | 0.29215541 | 2.8317E-06 | 1.87742 | down |
| Com_4346_pos  | N-(4-fluorophenyl)-N'-(2-piperidinophenyl)urea                                                | C18 H20 F N3 O  | 335.14538 | 5.329 | 336.15266 | Invalid mass | No results   | No results | --         | Organoheterocyclic compounds            | 0.22932447 | 3.2423E-06 | 1.52276 | down |
| Com_2821_pos  | 2-{1-[2-(1-benzothiophen-5-ylamino)-2-oxoethyl]cyclohexyl}acetic acid                         | C18 H21 N O3 S  | 331.12057 | 5.178 | 330.11329 | Invalid mass | No results   | No results | --         | --                                      | 5.41508383 | 3.5477E-06 | 1.77221 | up   |
| Com_221_neg   | 2,6-Dihydroxypurine                                                                           | C5 H4 N4 O2     | 152.03335 | 4.751 | 153.04062 | No results   | No results   | Full match | cpd:C00385 | --                                      | 5.58299657 | 3.7992E-06 | 1.5156  | up   |
| Com_1563_pos  | 5-Methylcytidine                                                                              | C10 H15 N3 O5   | 211.09585 | 1.872 | 256.09419 | No results   | Invalid mass | No results | --         | Organoheterocyclic compounds            | 0.02498322 | 4.1235E-06 | 1.74282 | down |
| Com_9270_neg  | N(6)-OH-Me-Adenosine                                                                          | C11 H15 N5 O5   | 297.1071  | 3.954 | 298.11438 | Full match   | No results   | Full match | --         | Nucleosides, nucleotides, and analogues | 5.63017214 | 4.2946E-06 | 1.55615 | up   |
| Com_3280_pos  | 8,15-Dihete                                                                                   | C20 H32 O4      | 336.23058 | 6.632 | 335.22331 | No results   | No results   | Full match | --         | Nucleosides, nucleotides, and analogues | 7.58103923 | 4.8417E-06 | 1.88504 | up   |
| Com_12510_neg | N2-Methylguanosine                                                                            | C11 H15 N5 O5   | 297.10734 | 4.819 | 296.10006 | Full match   | Full match   | Full match | --         | --                                      | 0.24634997 | 5.1492E-06 | 1.81387 | down |
| Com_4051_neg  | 17(S)-HpDHA                                                                                   | C22 H32 O4      | 396.20128 | 5.41  | 395.19398 | Invalid mass | No results   | No results | --         | Nucleosides, nucleotides, and analogues | 0.20116617 | 5.228E-06  | 1.88014 | down |
| Com_50_neg    | Oxohongdenafil                                                                                | C25 H32 N6 O4   | 458.27272 | 5.336 | 459.28067 | Invalid mass | No results   | No results | --         | Lipids and lipid-like molecules         | 2.39144946 | 7.2299E-06 | 1.6802  | up   |
| Com_3168_pos  | Radicinin                                                                                     | C12 H12 O5      | 236.07045 | 5.72  | 473.14819 | Invalid mass | No results   | No results | --         | Organic oxygen compounds                | 0.23886034 | 7.2823E-06 | 1.61633 | down |
| Com_2749_pos  | DI-Indole-3-lactic acid                                                                       | C11 H11 N O3    | 205.07356 | 5.882 | 204.06628 | No results   | No results   | Full match | --         | Organic oxygen compounds                | 4.76342935 | 7.9854E-06 | 1.67071 | up   |
| Com_1238_neg  |                                                                                               |                 |           |       |           |              |              |            |            | Organoheterocyclic compounds            | 0.19801359 | 8.5668E-06 | 1.84023 | down |

|               |                                                                                                 |                    |           |       |           |              |              |            |            |                                         |            |            |         |      |
|---------------|-------------------------------------------------------------------------------------------------|--------------------|-----------|-------|-----------|--------------|--------------|------------|------------|-----------------------------------------|------------|------------|---------|------|
| Com_7326_neg  | LPE 20:5                                                                                        | C25 H42 N O7 P     | 499.27085 | 8.215 | 498.26358 | No results   | Full match   | No results | --         | Lipids and lipid-like molecules         | 4.20823938 | 8.7369E-06 | 1.68172 | up   |
| Com_636_neg   | 2-Deoxyuridine                                                                                  | C9 H12 N2 O5       | 228.0746  | 2.009 | 227.06733 | No results   | No results   | Full match | cpd:C00526 | Nucleosides, nucleotides, and analogues | 6.44444881 | 9.1547E-06 | 1.93345 | up   |
| Com_6187_pos  | 6-anilino-1,3-dimethyl-1,2,3,4-tetrahydropyrimidine-2,4-dione                                   | C12 H13 N3 O2      | 231.10397 | 4.022 | 232.11124 | Invalid mass | No results   | No results | --         | --                                      | 0.05206626 | 9.2763E-06 | 1.80054 | down |
| Com_5849_neg  | (+/-)12(13)-DiHOME                                                                              | C18 H34 O4         | 296.2354  | 7.254 | 295.22812 | Invalid mass | No results   | No match   | cpd:C14829 | Lipids and lipid-like molecules         | 0.13987538 | 1.3677E-05 | 1.593   | down |
| Com_8893_pos  | HMH                                                                                             | C17 H25 N7 O4 S    | 445.15318 | 5.806 | 446.16045 | Invalid mass | No results   | No results | --         | --                                      | 0.39582373 | 1.3939E-05 | 1.73013 | down |
| Com_571_pos   | Acetylcarnitine                                                                                 | C9 H17 N O4        | 203.11575 | 5.622 | 226.10483 | No results   | No results   | Full match | cpd:C02571 | Lipids and lipid-like molecules         | 0.32078989 | 1.3965E-05 | 1.63494 | down |
| Com_8209_pos  | Vitamin B2                                                                                      | C17 H20 N4 O6      | 376.1382  | 4.9   | 377.14548 | No results   | No results   | Full match | cpd:C00255 | Organoheterocyclic compounds            | 0.25877718 | 1.4163E-05 | 1.72385 | down |
| Com_5772_pos  | 7,8-Dihydrofolate                                                                               | C19 H21 N7 O6      | 443.15703 | 5.755 | 444.16431 | No results   | No results   | Full match | cpd:C00415 | --                                      | 6.48855289 | 1.456E-05  | 1.66401 | up   |
| Com_4550_neg  | 6-phospho-D-glucono-1,5-lactone                                                                 | C6 H11 O9 P        | 258.01324 | 5.076 | 257.00597 | No results   | No results   | Full match | cpd:C01236 | --                                      | 0.45323711 | 1.5454E-05 | 1.60316 | down |
| Com_6810_pos  | 6-styryl-3-phenyl-2,5-dihydro-1,2,4-triazin-5-one                                               | C17 H13 N3 O       | 275.10555 | 7.731 | 276.11284 | Full match   | No results   | No results | --         | --                                      | 3.82790764 | 1.7639E-05 | 1.73344 | up   |
| Com_6484_neg  | 11-Dehydro thromboxane B2                                                                       | C20 H32 O6         | 404.19692 | 6.502 | 403.18964 | Invalid mass | No results   | No results | cpd:C05964 | Lipids and lipid-like molecules         | 2.2957898  | 1.7665E-05 | 1.3305  | up   |
| Com_993_neg   | 1-Methylguanosine                                                                               | C11 H15 N5 O5      | 297.1076  | 3.708 | 296.10032 | No results   | No results   | Full match | cpd:C04545 | Nucleosides, nucleotides, and analogues | 4.01959663 | 1.7827E-05 | 1.62243 | up   |
| Com_3056_pos  | Virginiamycin                                                                                   | C28 H35 N3 O7      | 507.23154 | 5.143 | 508.23882 | Invalid mass | No results   | No results | cpd:C11299 | Phenylpropanoids and polyketides        | 0.29366044 | 1.8065E-05 | 1.54938 | down |
| Com_7360_pos  | 10-Nitrolinoleate                                                                               | C18 H31 N O4       | 307.21193 | 7.529 | 308.21921 | Invalid mass | No results   | No results | cpd:C13800 | Lipids and lipid-like molecules         | 2.43307122 | 1.9249E-05 | 1.24331 | up   |
| Com_2240_pos  | ethyl 2-amino-8H-indeno[2,1-b]thiophene-3-carboxylate                                           | C14 H13 N O2 S     | 259.06645 | 5.212 | 260.07373 | Full match   | No results   | No results | --         | --                                      | 0.1247327  | 1.9963E-05 | 1.55746 | down |
| Com_9961_neg  | myricetin 3-O-beta-D-galactopyranoside                                                          | C21 H20 O13        | 480.08997 | 2.146 | 479.08269 | Full match   | No results   | No results | --         | --                                      | 0.31626494 | 2.0159E-05 | 1.1706  | down |
| Com_82_pos    | Isoquinoline                                                                                    | C9 H7 N            | 129.0578  | 5.864 | 130.06507 | Full match   | No results   | No results | cpd:C06323 | Organoheterocyclic compounds            | 4.90225504 | 2.1166E-05 | 1.79968 | up   |
| Com_13462_neg | dCMP                                                                                            | C9 H14 N3 O7 P     | 307.05824 | 3.686 | 306.05096 | No results   | No results   | Full match | cpd:C00239 | Nucleosides, nucleotides, and analogues | 0.04876032 | 2.1937E-05 | 1.68735 | down |
| Com_4731_pos  | PE 18:0                                                                                         | C23 H46 N O8 P     | 517.27809 | 7.697 | 518.28535 | No results   | Invalid mass | No results | cpd:C00350 | Lipids and lipid-like molecules         | 0.19384444 | 2.2764E-05 | 1.56539 | down |
| Com_2687_pos  | Mitragynine                                                                                     | C23 H30 N2 O4      | 398.2278  | 5.246 | 399.23508 | Invalid mass | No results   | No results | cpd:C09226 | Alkaloids and derivatives               | 2.91246975 | 2.7472E-05 | 1.85333 | up   |
| Com_1993_neg  | 2-[(3S)-1-(Cyclohexylmethyl)-3-pyrrolidinyl]-5-fluoro-1H-benzimidazole                          | C18 H24 F N3       | 301.20057 | 5.34  | 300.19329 | Invalid mass | No results   | No results | --         | Organoheterocyclic compounds            | 0.08335125 | 2.764E-05  | 1.64725 | down |
| Com_8047_pos  | ATP                                                                                             | C10 H16 N5 O13 P3  | 506.99597 | 4.783 | 508.00325 | No results   | No results   | Full match | cpd:C00002 | Nucleosides, nucleotides, and analogues | 2.1414112  | 3.5475E-05 | 1.57537 | up   |
| Com_5076_neg  | Propionyl-L-carnitine                                                                           | C10 H19 N O4       | 217.13137 | 5.797 | 216.12409 | No results   | No results   | Full match | --         | Lipids and lipid-like molecules         | 0.39002881 | 3.8215E-05 | 1.5374  | down |
| Com_85_pos    | Hypoxanthine                                                                                    | C5 H4 N4 O         | 136.03843 | 3.678 | 137.04571 | Full match   | Full match   | Full match | cpd:C00262 | Organoheterocyclic compounds            | 0.01772402 | 4.0005E-05 | 1.90553 | down |
| Com_285_neg   | 5-(tert-butyl)-2-methyl-N-(5-methyl-3-isoxazolyl)-3-furamide                                    | C14 H18 N2 O3      | 262.13205 | 5.23  | 261.12477 | Full match   | No results   | Full match | --         | --                                      | 0.31603192 | 4.1957E-05 | 1.29769 | down |
| Com_8258_neg  | S-Lactoylglutathione                                                                            | C13 H21 N3 O8 S    | 379.10492 | 4.807 | 378.09764 | No results   | No results   | Full match | cpd:C03451 | Organic acids and derivatives           | 2.28021771 | 4.2658E-05 | 1.75453 | up   |
| Com_2224_pos  | Gibberellic acid                                                                                | C19 H22 O6         | 368.11908 | 5.131 | 369.12672 | Invalid mass | No results   | No results | cpd:C01699 | Lipids and lipid-like molecules         | 2.24786659 | 4.4971E-05 | 1.71378 | up   |
| Com_4118_neg  | 2-(acetylthio)-4-(methylthio)butanoic acid                                                      | C7 H13 N O3 S      | 209.06838 | 5.167 | 208.06109 | Invalid mass | Invalid mass | No results | --         | --                                      | 0.47055664 | 4.8267E-05 | 1.86348 | down |
| Com_970_neg   | 2-(1-naphthyl)-N-(6-quinoxaliny)acetamide                                                       | C20 H15 N3 O       | 313.12186 | 5.6   | 312.11458 | Full match   | No results   | No results | --         | --                                      | 0.2742953  | 4.9397E-05 | 1.86199 | down |
| Com_1330_pos  | Noroxycodone-d3                                                                                 | C17 H16 [2]H3 N O4 | 304.14925 | 5.172 | 305.15653 | Full match   | No results   | No results | --         | --                                      | 0.48308946 | 5.0641E-05 | 1.91557 | down |
| Com_6356_pos  | 5-hydroxy-6,7-dimethoxy-2-phenyl-4H-chromen-4-yl-5,7-dimethyl-2-phenylpyrazolo[1,5-a]pyrimidine | C17 H14 O5         | 336.04019 | 6.469 | 337.04747 | Invalid mass | No results   | No results | --         | --                                      | 4.39834422 | 5.6167E-05 | 1.6508  | up   |
| Com_1750_pos  | phenylpyrazolo[1,5-a]pyrimidine                                                                 | C14 H13 N3         | 245.09008 | 6.256 | 246.09718 | Invalid mass | No results   | No results | --         | --                                      | 0.12448862 | 5.6204E-05 | 1.29879 | down |

|              |                                                                       |                    |           |       |           |              |              |            |            |                                         |            |            |         |      |
|--------------|-----------------------------------------------------------------------|--------------------|-----------|-------|-----------|--------------|--------------|------------|------------|-----------------------------------------|------------|------------|---------|------|
| Com_7289_pos | (2E)-6-hydroxy-2-methyl-6-(4-methylphenyl)hept-2-enoic acid           | C15 H20 O3         | 270.11849 | 6.235 | 271.12576 | Invalid mass | No results   | No results | --         | --                                      | 0.27736087 | 5.6843E-05 | 1.65968 | down |
| Com_7973_pos | 1-(4-chlorophenyl)-4-hydroxy-6-isopropyl-3-phenylpyridin-2(1H)-one    | C20 H18 Cl N O2    | 339.10045 | 6.109 | 340.10773 | Invalid mass | No results   | No results | --         | --                                      | 5.15293243 | 6.16E-05   | 1.82924 | up   |
| Com_315_neg  | N-lactoyl-phenylalanine                                               | C12 H15 N O4       | 237.10021 | 5.62  | 236.09293 | No results   | No results   | Full match | --         | Organic acids and derivatives           | 0.3593795  | 6.1912E-05 | 1.34611 | down |
| Com_1049_neg | Esculin                                                               | C15 H16 O9         | 340.08592 | 5.114 | 339.07866 | Invalid mass | No results   | No results | cpd:C09264 | Phenylpropanoids and polyketides        | 3.24049748 | 6.4981E-05 | 1.32665 | up   |
| Com_1449_pos | 1-[(3S)-3-(1,3-Benzoxazol-2-yl)-1-pyrrolidinyl]-3-methoxy-1-propanone | C15 H18 N2 O3      | 274.13471 | 5.294 | 275.142   | Invalid mass | No results   | No results | --         | Organoheterocyclic compounds            | 2.17684106 | 6.5557E-05 | 1.4187  | up   |
| Com_1523_neg | Mestranol                                                             | C21 H26 O2         | 310.18174 | 8.222 | 309.17447 | No results   | Invalid mass | No results | cpd:C07618 | Lipids and lipid-like molecules         | 2.11847621 | 6.5799E-05 | 1.5134  | up   |
| Com_3158_neg | LPG 14:1                                                              | C20 H39 O9 P       | 454.23382 | 7.623 | 453.22654 | No results   | Full match   | No results | --         | Lipids and lipid-like molecules         | 0.33632672 | 6.5998E-05 | 1.60054 | down |
| Com_600_pos  | Meperidine-d4                                                         | C15 H17 [2]H4 N O2 | 251.18564 | 6.281 | 252.19292 | Invalid mass | No results   | No results | --         | --                                      | 0.30637162 | 6.6732E-05 | 1.31577 | down |
| Com_3486_neg | 16 $\alpha$ -Hydroxyestrone                                           | C18 H22 O3         | 304.16372 | 5.443 | 303.15645 | Invalid mass | No results   | No results | cpd:C05300 | Lipids and lipid-like molecules         | 0.31983863 | 7.0668E-05 | 1.42918 | down |
| Com_1591_neg | Asp-glu                                                               | C9 H14 N2 O7       | 262.0793  | 5.165 | 261.07202 | No results   | No results   | Full match | --         | Organic acids and derivatives           | 4.6367508  | 7.2559E-05 | 1.38356 | up   |
| Com_973_pos  | TQH                                                                   | C15 H24 N6 O6      | 384.16905 | 5.961 | 385.17633 | Invalid mass | No results   | No results | --         | --                                      | 6.01123809 | 7.3869E-05 | 1.744   | up   |
| Com_9258_pos | 4-acetyl-4-(ethoxycarbonyl)valylproline                               | C12 H18 O7         | 296.08746 | 7.747 | 297.09469 | Invalid mass | No results   | No results | --         | --                                      | 4.57516223 | 8.0023E-05 | 1.79208 | up   |
| Com_937_pos  | Valylproline                                                          | C10 H18 N2 O3      | 214.13154 | 5.213 | 215.13882 | Full match   | No results   | No results | --         | Organic acids and derivatives           | 3.7293967  | 8.0995E-05 | 1.78659 | up   |
| Com_4789_neg | Feruloyl Putrescine                                                   | C14 H20 N2 O3      | 264.14769 | 5.304 | 263.14046 | No results   | No results   | Full match | cpd:C10497 | Phenylpropanoids and polyketides        | 0.21929122 | 8.4596E-05 | 1.69917 | down |
| Com_1944_pos | 5-Hydroxytryptophol                                                   | C10 H11 N O2       | 177.07893 | 5.484 | 178.08623 | No results   | No results   | Full match | --         | Organoheterocyclic compounds            | 2.8638789  | 8.7439E-05 | 1.62737 | up   |
| Com_130_neg  | 3-[(methoxycarbonyl)amino]-2,2,3-trimethylbutanoic acid               | C9 H17 N O4        | 203.11558 | 5.622 | 202.1083  | Full match   | No results   | Full match | --         | --                                      | 0.40826892 | 9.6872E-05 | 1.56491 | down |
| Com_1141_pos | DL-Lysine                                                             | C6 H14 N2 O2       | 146.10533 | 1.14  | 147.11256 | Full match   | Full match   | Full match | cpd:C16440 | Organic acids and derivatives           | 6.04118038 | 9.9282E-05 | 1.24994 | up   |
| Com_8310_neg | Deoxycytidine                                                         | C9 H13 N3 O4       | 227.09039 | 3.359 | 226.08307 | No results   | No results   | Full match | cpd:C00881 | Nucleosides, nucleotides, and analogues | 15.4229488 | 0.0001114  | 1.86405 | up   |
| Com_4547_pos | 5-[4-(tert-butyl)phenyl]-1,3,4-oxadiazole-2-thiol                     | C12 H14 N2 O S     | 234.07956 | 5.727 | 257.06907 | Invalid mass | No results   | No results | --         | --                                      | 2.22589209 | 0.00011378 | 1.56633 | up   |
| Com_333_pos  | Inosine                                                               | C10 H12 N4 O5      | 268.08053 | 3.68  | 269.08784 | Full match   | Full match   | Full match | cpd:C00294 | Nucleosides, nucleotides, and analogues | 0.01270456 | 0.00012175 | 1.90711 | down |
| Com_1238_pos | EPH                                                                   | C16 H23 N5 O6      | 381.1663  | 5.428 | 382.17357 | Full match   | No results   | No results | --         | --                                      | 0.11808429 | 0.00013204 | 1.62588 | down |
| Com_3292_pos | 1-(4-hydroxyphenyl)propane-1,2-diol                                   | C9 H12 O3          | 190.0586  | 1.347 | 191.06587 | Invalid mass | No results   | No match   | --         | --                                      | 7.40264912 | 0.00013324 | 1.37318 | up   |
| Com_1756_neg | D-Xylonic Acid                                                        | C5 H10 O6          | 166.04737 | 5.175 | 377.09293 | No results   | No results   | Full match | --         | Organic oxygen compounds                | 0.08703201 | 0.00013991 | 1.66523 | down |
| Com_2180_pos | 5-Methyluridine                                                       | C10 H14 N2 O6      | 258.085   | 4.842 | 259.09221 | No results   | No results   | Full match | --         | Nucleosides, nucleotides, and analogues | 2.82411705 | 0.00016202 | 1.50141 | up   |
| Com_7813_pos | 3-(5,7-dimethoxy-4-oxo-4H-chromen-2-yl)propanoic acid                 | C14 H14 O6         | 261.05277 | 5.807 | 279.08686 | Invalid mass | No results   | No results | --         | --                                      | 0.2338851  | 0.00016454 | 1.59333 | down |
| Com_335_pos  | 6-Methylquinoline                                                     | C10 H9 N           | 161.08399 | 5.321 | 144.0807  | Invalid mass | No results   | No results | --         | Organoheterocyclic compounds            | 0.4550803  | 0.00020213 | 1.71056 | down |
| Com_1374_neg | 4-Methyl-2-Oxopentanoic Acid                                          | C6 H10 O3          | 130.06239 | 5.196 | 175.0607  | No results   | No results   | Full match | --         | --                                      | 2.25306367 | 0.00021136 | 1.27003 | up   |
| Com_1578_neg | Azelaic acid                                                          | C9 H16 O4          | 188.10461 | 5.417 | 187.09734 | Full match   | No results   | Full match | cpd:C08261 | Lipids and lipid-like molecules         | 0.23105413 | 0.00023162 | 1.90363 | down |
| Com_3764_pos | N-acetyl-L-ornithine                                                  | C7 H14 N2 O3       | 174.10089 | 5.467 | 366.23589 | No results   | No results   | Full match | cpd:C00437 | Organic acids and derivatives           | 0.2240987  | 0.00025543 | 1.32667 | down |
| Com_520_pos  | 8-Hydroxyquinoline                                                    | C9 H7 N O          | 145.05262 | 5.777 | 146.05992 | Full match   | Full match   | No results | cpd:C19434 | Organoheterocyclic compounds            | 4.73680357 | 0.00025743 | 1.74335 | up   |
| Com_1245_pos | Acetylcysteine                                                        | C5 H9 N O3 S       | 163.02992 | 1.5   | 146.02663 | No results   | No results   | Full match | cpd:C06809 | Organic acids and derivatives           | 0.24615672 | 0.00028328 | 1.32588 | down |
| Com_2501_neg | 3-Hydroxydecanoic acid                                                | C10 H20 O3         | 142.13542 | 6.773 | 187.13364 | Invalid mass | Invalid mass | No results | --         | Organic acids and derivatives           | 0.44846984 | 0.00029033 | 1.66566 | down |
| Com_2502_neg | 10-Hydroxydecanoic acid                                               | C10 H20 O3         | 188.14098 | 6.778 | 187.13362 | No results   | No results   | Full match | cpd:C02774 | Organic acids and derivatives           | 0.44846984 | 0.00029033 | 1.66566 | down |
| Com_228_neg  | Cysteinylglycine                                                      | C5 H10 N2 O3 S     | 178.04086 | 5.225 | 177.03358 | Full match   | No results   | Full match | --         | Organic acids and derivatives           | 0.08619222 | 0.00031519 | 1.52287 | down |
| Com_7190_neg | 8-Aminooctanoic acid                                                  | C8 H17 N O2        | 159.12545 | 5.618 | 158.11819 | No results   | No results   | Full match | --         | Organic acids and derivatives           | 0.33573068 | 0.00034612 | 1.489   | down |
| Com_2559_pos | (1R,2R)-trans-N-Boc-1,2-cyclohexanediamine                            | C11 H22 N2 O2      | 214.16797 | 5.739 | 215.17525 | No results   | No results   | Full match | --         | Organic nitrogen compounds              | 0.09299612 | 0.00038738 | 1.8508  | down |
| Com_3169_neg | 6-Hydroxymelatonin                                                    | C13 H16 N2 O3      | 248.11623 | 5.142 | 247.10896 | No results   | No results   | Full match | cpd:C05643 | Organoheterocyclic compounds            | 3.16010156 | 0.00042968 | 1.44598 | up   |

|               |                                                                         |                   |           |        |           |              |              |            |            |                                         |            |            |         |      |
|---------------|-------------------------------------------------------------------------|-------------------|-----------|--------|-----------|--------------|--------------|------------|------------|-----------------------------------------|------------|------------|---------|------|
| Com_176_pos   | DL-Norvaline                                                            | C5 H11 N O2       | 117.07901 | 1.3    | 118.08629 | No results   | No results   | Full match | --         | Organic acids and derivatives           | 4.65803528 | 0.00046211 | 1.57025 | up   |
| Com_2814_neg  | Prostaglandin F3α                                                       | C20 H32 O5        | 398.23407 | 8.57   | 397.2268  | Invalid mass | No results   | No results | cpd:C06476 | Lipids and lipid-like molecules         | 2.3382522  | 0.00051806 | 1.48939 | up   |
| Com_1971_neg  | Thromboxane B1                                                          | C20 H36 O6        | 408.22819 | 8.898  | 407.22091 | Invalid mass | No match     | No results | --         | Lipids and lipid-like molecules         | 5.75753925 | 0.00059881 | 1.292   | up   |
| Com_4929_neg  | LPE 10:0                                                                | C15 H32 N O7 P    | 369.19205 | 6.565  | 368.18476 | No results   | Full match   | No results | cpd:C04230 | Lipids and lipid-like molecules         | 0.27853661 | 0.00063079 | 1.34662 | down |
| Com_3465_pos  | Vatalanib dihydrochloride                                               | C20 H15 Cl N4     | 324.11761 | 5.633  | 347.1068  | Invalid mass | No results   | No results | --         | --                                      | 4.18798733 | 0.00065444 | 1.01521 | up   |
| Com_11030_pos | Methyl EudesMate                                                        | C11 H14 O5        | 226.08386 | 4.997  | 227.09114 | No results   | No results   | Full match | --         | Benzenoids                              | 0.28907638 | 0.0006672  | 1.66685 | down |
| Com_2500_neg  | 2-(1-{2-[(3-furylmethyl)amino]-2-oxoethyl}cyclohexyl)acetic acid        | C15 H21 N O4      | 279.14744 | 5.731  | 278.14016 | Full match   | No results   | No results | --         | --                                      | 0.49048545 | 0.00073001 | 1.63178 | down |
| Com_909_neg   | Leu-Pro                                                                 | C11 H20 N2 O3     | 228.14708 | 5.151  | 227.13981 | No results   | No results   | Full match | --         | Organic acids and derivatives           | 0.19678395 | 0.00074784 | 1.64268 | down |
| Com_1249_pos  | LPE 14:1                                                                | C19 H38 N O7 P    | 423.23826 | 7.633  | 424.24548 | No results   | Full match   | No results | --         | Lipids and lipid-like molecules         | 0.39386053 | 0.00075009 | 1.14797 | down |
| Com_292_pos   | Proline-hydroxyproline                                                  | C10 H16 N2 O4     | 228.1108  | 5.163  | 229.11808 | No results   | Full match   | No results | --         | Organic acids and derivatives           | 3.45417233 | 0.00093267 | 1.36874 | up   |
| Com_3641_neg  | LPA 12:0                                                                | C15 H31 O7 P      | 354.18121 | 7.575  | 353.17393 | No results   | Full match   | No results | cpd:C00681 | Lipids and lipid-like molecules         | 22.2629971 | 0.00098799 | 1.71931 | up   |
| Com_4127_neg  | Rutarin                                                                 | C20 H24 O10       | 470.14787 | 5.079  | 469.1406  | Invalid mass | No results   | No results | cpd:C09309 | Phenylpropanoids and polyketides        | 2.40512819 | 0.00104349 | 1.74082 | up   |
| Com_12308_neg | IDP                                                                     | C10 H14 N4 O11 P2 | 428.01449 | 3.688  | 427.00721 | No results   | No results   | Full match | cpd:C00104 | Nucleosides, nucleotides, and analogues | 0.11415571 | 0.00116325 | 1.5761  | down |
| Com_845_pos   | JWH 250 N-pentanoic acid metabolite                                     | C22 H23 N O4      | 365.15825 | 4.875  | 366.16553 | Invalid mass | No results   | No results | --         | Organoheterocyclic compounds            | 0.32109139 | 0.00119564 | 1.33663 | down |
| Com_1651_neg  | Pentadecanoic Acid                                                      | C15 H30 O2        | 288.23048 | 7.095  | 287.2232  | Invalid mass | No results   | No results | cpd:C16537 | Lipids and lipid-like molecules         | 0.4473743  | 0.00120356 | 1.67102 | down |
| Com_958_pos   | Methionine sulfoxide                                                    | C5 H11 N O3 S     | 165.04575 | 1.945  | 148.04245 | No results   | No results   | Full match | cpd:C02989 | Organic acids and derivatives           | 2.89649302 | 0.00133211 | 1.21643 | up   |
| Com_4002_neg  | LPG 14:0                                                                | C20 H41 O9 P      | 456.24958 | 8.211  | 455.2423  | No results   | Full match   | No results | --         | Lipids and lipid-like molecules         | 0.2293166  | 0.00136212 | 1.56094 | down |
| Com_181_neg   | Sucrose                                                                 | C12 H22 O11       | 342.11685 | 1.356  | 387.11507 | Full match   | Full match   | Full match | cpd:C00089 | Organic oxygen compounds                | 3.61810423 | 0.00157016 | 1.32591 | up   |
| Com_1082_pos  | L-cysteine                                                              | C3 H7 N O2 S      | 121.01977 | 1.32   | 122.02705 | No results   | No results   | Full match | cpd:C00097 | Organic acids and derivatives           | 2.72079196 | 0.00187034 | 1.50027 | up   |
| Com_161_neg   | Porphobilinogen                                                         | C10 H14 N2 O4     | 226.09528 | 4.923  | 225.08801 | Full match   | No results   | Full match | cpd:C00931 | Organic nitrogen compounds              | 0.41934663 | 0.00236629 | 1.68464 | down |
| Com_2453_pos  | 6-(7-methyloctyl)-1H,3H,4H,6H-furo[3,4-c]furan-1-one                    | C15 H24 O3        | 252.17016 | 6.76   | 253.17742 | Invalid mass | No results   | No results | --         | --                                      | 0.35157781 | 0.00282607 | 1.34729 | down |
| Com_1824_pos  | α-Lactose                                                               | C12 H22 O11       | 359.14233 | 1.312  | 360.14961 | Invalid mass | Invalid mass | No results | cpd:C00243 | Organic oxygen compounds                | 4.28981011 | 0.00289157 | 1.13175 | up   |
| Com_1081_pos  | D-Cysteine                                                              | C3 H7 N O2 S      | 103.99324 | 1.334  | 122.02706 | Invalid mass | Invalid mass | No results | cpd:C00793 | Organic acids and derivatives           | 2.79224689 | 0.00295679 | 1.4126  | up   |
| Com_775_pos   | D-(+)-Maltose                                                           | C12 H22 O11       | 364.09778 | 1.324  | 365.10506 | Invalid mass | No results   | No results | cpd:C01971 | Organic oxygen compounds                | 3.15569973 | 0.00298162 | 1.12993 | up   |
| Com_9125_pos  | Deoxyinosine                                                            | C10 H12 N4 O4     | 252.0855  | 4.021  | 275.07481 | No results   | No results   | Full match | cpd:C05512 | Nucleosides, nucleotides, and analogues | 0.25389869 | 0.00298798 | 1.28579 | down |
| Com_10469_neg | N-Acetyl-L-phenylalanine                                                | C11 H13 N O3      | 225.09982 | 5.571  | 224.0927  | Invalid mass | Invalid mass | No results | cpd:C03519 | Organic acids and derivatives           | 0.46220857 | 0.00356417 | 1.30343 | down |
| Com_57_neg    | Indole-3-lactic acid                                                    | C11 H11 N O3      | 205.07374 | 5.536  | 204.06646 | Full match   | Full match   | Full match | cpd:C02043 | Organoheterocyclic compounds            | 0.10501777 | 0.00365724 | 1.67504 | down |
| Com_5307_pos  | Kinetin                                                                 | C10 H9 N5 O       | 215.08068 | 4.886  | 469.12496 | No results   | No results   | Full match | cpd:C08272 | Organoheterocyclic compounds            | 0.26819646 | 0.0041962  | 1.46115 | down |
| Com_8594_neg  | Morphine-3-glucuronide                                                  | C23 H27 N O9      | 461.16877 | 6.446  | 460.16149 | Full match   | No results   | No results | cpd:C16643 | Alkaloids and derivatives               | 0.4212662  | 0.00469579 | 1.31964 | down |
| Com_9900_neg  | LPA 14:0                                                                | C17 H35 O7 P      | 382.21216 | 8.621  | 381.20489 | No results   | Full match   | No results | cpd:C00681 | Lipids and lipid-like molecules         | 3.24268168 | 0.00479534 | 1.10094 | up   |
| Com_1811_neg  | Uric acid                                                               | C5 H4 N4 O3       | 168.02788 | 1.825  | 167.0206  | Full match   | Full match   | Full match | cpd:C00366 | Organoheterocyclic compounds            | 3.55286789 | 0.00492578 | 1.14185 | up   |
| Com_1972_neg  | LPE 8:0                                                                 | C13 H28 N O7 P    | 341.16082 | 6.011  | 340.15354 | No results   | Full match   | No results | --         | Lipids and lipid-like molecules         | 0.45632275 | 0.00494887 | 1.34429 | down |
| Com_4204_neg  | LPE 13:0                                                                | C18 H38 N O7 P    | 411.2392  | 7.565  | 410.23192 | No results   | Full match   | Full match | --         | Lipids and lipid-like molecules         | 3.07063829 | 0.00570138 | 1.50683 | up   |
| Com_1769_neg  | Royal jelly acid                                                        | C10 H18 O3        | 186.12575 | 5.669  | 231.12396 | No results   | No results   | Full match | --         | Organic acids and derivatives           | 4.04381804 | 0.00609882 | 1.14288 | up   |
| Com_6145_pos  | 2-[[{(4-phenyl-1H-pyrazol-5-yl)amino]methylene}-1H-indene-1,3(2H)-dione | C19 H13 N3 O2     | 315.10007 | 6.294  | 316.10756 | Full match   | No results   | No results | --         | --                                      | 2.65918867 | 0.00750483 | 1.09562 | up   |
| Com_83_neg    | Gallic acid                                                             | C7 H6 O5          | 124.01545 | 0.454  | 169.01366 | Invalid mass | Invalid mass | No results | cpd:C01424 | Benzenoids                              | 5.18161427 | 0.00764051 | 1.39304 | up   |
| Com_7417_pos  | Deoxyribose 5-Phosphate                                                 | C5 H11 O7 P       | 214.02398 | 1.368  | 237.01321 | No results   | No results   | Full match | --         | --                                      | 2.20210379 | 0.00850005 | 1.06277 | up   |
| Com_4804_pos  | UR-144 N-(2-hydroxypentyl) metabolite                                   | C21 H29 N O2      | 155.09448 | 5.341  | 173.12836 | Invalid mass | No results   | No results | --         | Organoheterocyclic compounds            | 2.01061766 | 0.00930809 | 1.03375 | up   |
| Com_6095_pos  | 3-(4-pyridylmethylidene)chroman-4-one                                   | C15 H11 N O2      | 237.08218 | 6      | 238.08949 | Invalid mass | No results   | No results | --         | --                                      | 0.33547631 | 0.00954698 | 1.06252 | down |
| Com_14668_neg | Nicotinuric Acid                                                        | C8 H8 N2 O3       | 180.0531  | 10.247 | 179.04582 | No results   | No results   | Full match | cpd:C05380 | Organic acids and derivatives           | 2.41711872 | 0.01164131 | 1.33701 | up   |
| Com_3377_pos  | R-1 Methanandamide phosphate                                            | C23 H40 N O5 P    | 882.52264 | 4.991  | 442.26859 | Invalid mass | No results   | No results | --         | Organic acids and derivatives           | 0.34007988 | 0.01226055 | 1.03644 | down |
| Com_9324_pos  | HMR                                                                     | C17 H30 N8 O4 S   | 482.21327 | 5.955  | 465.2099  | Invalid mass | No results   | No results | --         | --                                      | 3.23766853 | 0.01545004 | 1.24251 | up   |

|              |                      |                     |           |       |           |              |            |            |            |                                  |            |            |         |      |
|--------------|----------------------|---------------------|-----------|-------|-----------|--------------|------------|------------|------------|----------------------------------|------------|------------|---------|------|
| Com_659_pos  | 3-Amino-3-deoxy-D-   | C6 H13 N O5         | 179.08059 | 4.841 | 180.08786 | Invalid mass | No results | No results | cpd:C12212 | Organic oxygen compounds         | 5.68801122 | 0.01624991 | 1.16383 | up   |
| Com_95_neg   | Perillic acid        | C10 H14 O2          | 166.09891 | 6.151 | 165.09162 | Full match   | No results | Full match | cpd:C11924 | Lipids and lipid-like molecules  | 0.10994493 | 0.01667212 | 1.26061 | down |
| Com_9603_neg | LPG O-13:1           | C19 H39 O8 P        | 426.23918 | 7.077 | 425.2319  | No results   | Full match | No results | --         | --                               | 4.27574624 | 0.02011391 | 1.33892 | up   |
| Com_3772_pos | Delta-Tridecalactone | C13 H24 O2          | 212.17735 | 6.358 | 235.16655 | No results   | No results | Full match | --         | Organoheterocyclic compounds     | 0.45461939 | 0.02211146 | 1.36179 | down |
| Com_5269_pos | Pyridoxamine         | C8 H12 N2 O2        | 168.08995 | 5.94  | 207.05315 | No results   | No results | Full match | cpd:C00534 | Organoheterocyclic compounds     | 2.47970679 | 0.02232011 | 1.27256 | up   |
| Com_5287_neg | Methyldopa           | C10 H13 N O4        | 211.08429 | 5.418 | 210.07697 | No results   | No results | Full match | cpd:C07194 | Phenylpropanoids and polyketides | 0.48763928 | 0.03599247 | 1.1178  | down |
| Com_2639_neg | Butyryl-coenzyme A   | C25 H42 N7 O17 P3 S | 838.15329 | 4.689 | 418.06928 | Invalid mass | No results | No results | cpd:C00136 | Lipids and lipid-like molecules  | 0.16230081 | 0.03612033 | 1.11277 | down |
